# Supplementary material for: Cp*Co(iii)-catalyzed thiocarbamate-directed C–H aminocarbonylation, amination, and cascade annulation of pyrroles
Source: Royal Society of Chemistry journal article supplement (doi:10.1039/d2cc03992c), 2022-01-01

## Supporting Information

### **Cp\*Co(III)-Catalyzed Thiocarbamate Directed C–H Aminocarbonylation, Amination and Cascade Annulation of Pyrroles**

Shuvendu Saha and Modhu Sudan Maji\*

Department of Chemistry, Indian Institute of Technology Kharagpur, Kharagpur-721302  
India

[msm@chem.iitkgp.ac.in](mailto:msm@chem.iitkgp.ac.in)

| <b>Table of Contents</b>                                           | <b>Page Number</b> |
|--------------------------------------------------------------------|--------------------|
| <b>1. General Remarks</b>                                          | <b>S1</b>          |
| <b>2. General Procedure I (GP I):</b>                              | <b>S2</b>          |
| <b>3. Experimental Details and Characterization Data for 1</b>     | <b>S2-S5</b>       |
| <b>4. Optimization Table for C–H Aminocarbonylation</b>            | <b>S5</b>          |
| <b>5. General Procedure II (GP II):</b>                            | <b>S6</b>          |
| <b>6. Experimental Details and Characterization Data for 3, 4</b>  | <b>S6-S16</b>      |
| <b>7. Optimization Table for C–H Amidation</b>                     | <b>S17</b>         |
| <b>8. General Procedure III (GP III):</b>                          | <b>S18</b>         |
| <b>9. Experimental Details and Characterization Data for 6</b>     | <b>S18-S25</b>     |
| <b>10. Gram scale Synthesis and Removal of Directing group</b>     | <b>S26-S27</b>     |
| <b>11. Experimental Details and Characterization Data for 9-11</b> | <b>S27-S28</b>     |
| <b>12. Mechanistic Studies</b>                                     | <b>S29-S36</b>     |
| <b>13. Single Crystal X-ray Diffraction</b>                        | <b>S36-S38</b>     |
| <b>14. Computational Studies</b>                                   | <b>S38-S53</b>     |
| <b>15. References</b>                                              | <b>S54</b>         |
| <b>16. <sup>1</sup>H and <sup>13</sup>C NMR Spectra</b>            | <b>S55-S110</b>    |

## Experimental Section:

**General:** All reactions involving air or moisture sensitive reagents were carried out in flame dried glassware under nitrogen/argon atmosphere. 1,1,2,2-Tetrachloroethane was obtained from SRL India and used as received. Other solvents were obtained from Merck India and dried according to the standard literature procedure. Reactions were monitored by thin layer chromatography (TLC) using Merck silica gel 60 F254 pre-coated plates (0.25 mm), and visualized under UV light or by dipping into KMnO<sub>4</sub> or DNP solution. Silica gel (particle size 100-200 mesh) was purchased from SRL India for performing column chromatography by using mixture of hexanes and ethylacetate as eluent. The <sup>1</sup>H NMR spectroscopic data were recorded with a Bruker 400 or 500 MHz instruments. Proton decoupled <sup>13</sup>C NMR spectra, <sup>13</sup>C{<sup>1</sup>H}, were similarly recorded by using a broadband decoupled mode. Proton and carbon NMR chemical shifts ( $\delta$ ) are reported in parts per million (ppm) relative to residual proton or carbon signals in CDCl<sub>3</sub> ( $\delta$  = 7.26, 77.16) or DMSO-*d*<sub>6</sub> ( $\delta$ = 2.50, 39.52). Coupling constants (*J*) are reported in Hertz (Hz) and refer to apparent multiplicities. The following abbreviations are used for the multiplicities: s: singlet, d: doublet, t: triplet, q: quartet, dd: doublet of doublets, m: multiplet, br: broad. Infrared (IR) spectra were recorded by Perkin Elmer FTIR-ATR spectrometer, and reported in terms of wave number (cm<sup>-1</sup>). High resolution mass spectra (HRMS) were recorded in ESI (+Ve) method using a time-of-flight (TOF) mass analyzer.

## General Procedure for the Preparation of Pyrrolyl Thiocarbamates (GP I):<sup>1</sup>

In an oven-dried 25 mL round bottom flask, pyrrole (1.0 equiv) was taken and dissolved in anhydrous THF (2.5 mL/mmol). The resulting solution was cooled down to 0 °C and sodium hydride (1.2 equiv, 60% in mineral oil) was added in small portions. After hydrogen evolution was ceased, dimethylthiocarbamoyl chloride (1.2 equiv) was added to the solution and resulting mixture was stirred at the room temperature for 6 h. On complete consumption of starting material as indicated by TLC, the reaction mixture was quenched by adding saturated aq. NH<sub>4</sub>Cl solution. The aqueous layer was extracted with ethylacetate (2 x 10 mL), the combined organic layers were dried over Na<sub>2</sub>SO<sub>4</sub>, and evaporated under reduced pressure. The crude residue was purified by silica gel column chromatography using 2-5% ethylacetate in hexane as eluent to afford the products **1**.

### *N,N*-Dimethyl-3-(naphthalen-1-yl)-1*H*-pyrrole-1-carbothioamide (**1b**):

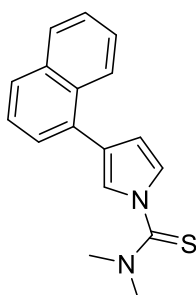

The titled compound **1b** was synthesized according to the **GP I** by using 3-(naphthalen-1-yl)-1*H*-pyrrole (2.0 mmol, 386 mg) and isolated as white solid after column chromatography on silica gel by using 2% ethylacetate in hexane as eluent (512 mg, 91%). <sup>1</sup>H NMR (500 MHz, CDCl<sub>3</sub>): δ (ppm) 8.31-8.29 (m, 1H), 7.90-7.89 (m, 1H), 7.81 (d, *J* = 8.0 Hz, 1H), 7.52-7.47 (m, 4H), 7.32-7.29 (m, 1H), 7.23-7.20 (m, 1H), 6.57 (d, *J* = 1.0 Hz, 1H), 3.41 (s, 6H).

<sup>13</sup>C NMR (126 MHz, CDCl<sub>3</sub>): δ (ppm) 183.5, 134.0, 133.1, 131.8, 128.4, 127.4, 126.7, 126.1, 126.0, 125.8, 125.6, 122.5, 120.8, 113.2, 44.0. FTIR: ν<sub>max</sub> (neat)/ cm<sup>-1</sup> = 2922, 1592, 1485, 1389, 1325, 1259, 1123, 1069, 937, 785. HRMS (ESI): calculated for C<sub>17</sub>H<sub>17</sub>N<sub>2</sub>S ([M+H]<sup>+</sup>): 281.1107; found 281.1085.

### 3-(Furan-2-yl)-*N,N*-dimethyl-1*H*-pyrrole-1-carbothioamide (**1c**):

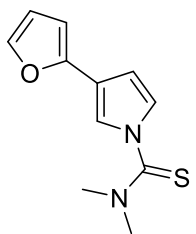

The titled compound **1c** was synthesized according to the **GP I** by using 3-(furan-2-yl)-1*H*-pyrrole (1.0 mmol, 133 mg) and isolated as yellow liquid after column chromatography on silica gel by using 2% ethylacetate in hexane as eluent (143 mg, 65%). <sup>1</sup>H NMR (500 MHz, CDCl<sub>3</sub>): δ (ppm) 7.39-7.35 (m, 1H), 7.30-7.27 (m, 1H), 7.10-7.03 (m, 1H), 6.45 (d, *J* = 1.0 Hz, 1H),

6.40-6.37 (m, 1H), 6.36-6.32 (m, 1H), 3.35 (s, 6H). <sup>13</sup>C NMR (126 MHz, CDCl<sub>3</sub>): δ (ppm) 183.2, 149.9, 140.8, 123.1, 118.3, 117.5, 111.3, 108.6, 104.0, 44.0. FTIR: ν<sub>max</sub> (neat)/ cm<sup>-1</sup> = 2925, 1515, 1387, 1328, 1248, 1146, 1086, 1005, 941, 781. HRMS (ESI): calculated for C<sub>11</sub>H<sub>13</sub>N<sub>2</sub>OS ([M+H]<sup>+</sup>): 221.0743; found 221.0747.

### *N,N*-Dimethyl-3-(thiophen-2-yl)-1*H*-pyrrole-1-carbothioamide (**1d**):

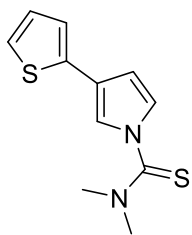

The titled compound **1d** was synthesized according to the **GP I** by using 3-(thiophen-2-yl)-1*H*-pyrrole (2.0 mmol, 298 mg) and isolated as yellow liquid after column chromatography on silica gel by using 5% ethylacetate in hexane as eluent (436 mg, 92%). **<sup>1</sup>H NMR** (500 MHz, CDCl<sub>3</sub>): δ (ppm) 7.27 (t, *J* = 1.8 Hz, 1H), 7.14 (d, *J* = 5.0 Hz, 1H), 7.09 (d, *J* = 3.5 Hz, 1H), 7.06 (t, *J* = 2.5 Hz, 1H), 7.00 (dd, *J* = 5.0, 3.5 Hz, 1H), 6.46 (dd, *J* = 3.0, 1.5 Hz, 1H), 3.37 (s, 6H). **<sup>13</sup>C NMR** (126 MHz, CDCl<sub>3</sub>): δ (ppm) 183.2, 137.7, 127.7, 123.1, 123.0, 122.5, 121.3, 118.1, 110.1, 44.0. **FTIR**:  $\nu_{\max}$  (neat)/ cm<sup>-1</sup> = 2932, 1515, 1391, 1324, 1258, 1146, 1077, 941, 839, 777. **HRMS (ESI)**: calculated for C<sub>11</sub>H<sub>12</sub>N<sub>2</sub>NaS<sub>2</sub> ([**M**+**Na**]<sup>+</sup>): 259.0334; found 259.0340.

### 3-Benzyl-*N,N*-dimethyl-1*H*-pyrrole-1-carbothioamide (**1e**):

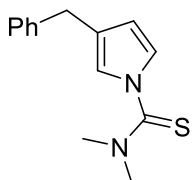

The titled compound **1e** was synthesized according to the **GP I** by using 3-benzyl-1*H*-pyrrole (2.0 mmol, 314 mg) and isolated as yellow sticky liquid after column chromatography on silica gel by using 5% ethylacetate in hexane as eluent (414 mg, 85%). **<sup>1</sup>H NMR** (400 MHz, CDCl<sub>3</sub>): δ (ppm) 7.39-7.28 (m, 5H), 7.11-7.04 (m, 1H), 6.91-6.83 (m, 1H), 6.19-6.12 (m, 1H), 3.87 (s, 2H), 3.40 (s, 6H). **<sup>13</sup>C NMR** (101 MHz, CDCl<sub>3</sub>): δ (ppm) 183.7, 141.0, 128.8, 128.4, 126.08, 126.05, 122.7, 119.9, 112.2, 43.9, 33.4. **FTIR**:  $\nu_{\max}$  (neat)/ cm<sup>-1</sup> = 2932, 1515, 1382, 1323, 1142, 1067, 938, 852, 777. **HRMS (ESI)**: calculated for C<sub>14</sub>H<sub>17</sub>N<sub>2</sub>S ([**M**+**H**]<sup>+</sup>): 245.1107; found 245.1109.

### 3-(2,6-Dimethylhept-5-en-1-yl)-*N,N*-dimethyl-1*H*-pyrrole-1-carbothioamide (**1f**):

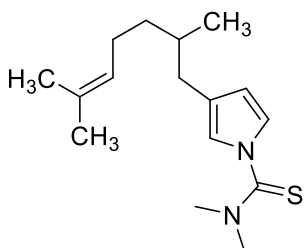

The titled compound **1f** was synthesized according to the **GP I** by using 3-(2,6-dimethylhept-5-en-1-yl)-1*H*-pyrrole (2.0 mmol, 383 mg) and isolated as yellow liquid after column chromatography on silica gel by using 5% ethylacetate in hexane as eluent (484 mg, 87%). **<sup>1</sup>H NMR** (400 MHz, CDCl<sub>3</sub>): δ (ppm) 6.99 (t, *J* = 2.0 Hz, 1H), 6.82-6.76 (m, 1H), 6.09-6.02 (m, 1H), 5.08 (t, *J* = 6.8 Hz, 1H), 3.33 (s, 6H), 2.41 (dd, *J* = 14.2, 5.8 Hz, 1H), 2.20 (dd, *J* = 14.0, 8.0 Hz, 1H), 2.08-1.90 (m, 2H), 1.67 (s, 3H), 1.64-1.61 (m, 1H), 1.59 (s, 3H), 1.43-1.33 (m, 1H), 1.19-1.10 (m, 1H), 0.87 (d, *J* = 6.4 Hz, 3H). **<sup>13</sup>C NMR** (101 MHz, CDCl<sub>3</sub>): δ (ppm) 183.8, 131.2, 125.8, 124.9, 122.2, 119.9, 112.7, 43.9, 36.8, 34.4, 33.6, 25.8, 25.7, 19.6, 17.8. **FTIR**:  $\nu_{\max}$  (neat)/ cm<sup>-1</sup> = 2912, 1514, 1381, 1326, 1146, 1062, 940, 853, 774. **HRMS (ESI)**: calculated for C<sub>16</sub>H<sub>27</sub>N<sub>2</sub>S ([**M**+**H**]<sup>+</sup>): 279.1889; found 279.1884.

### ***N,N*-Diethyl-1*H*-pyrrole-1-carbothioamide (1g):**

In an oven-dried 25 mL round bottom flask, pyrrole (134 mg, 2.0 mmol, 1.0 equiv) was taken and dissolved in 5 mL of anhydrous THF. The resulting solution was cooled down to 0 °C and sodium hydride (96 mg, 2.4 mmol, 1.2 equiv, 60% in mineral oil) was added in small portions. After hydrogen evolution was ceased, diethylcarbamoyl chloride (0.30 mL, 2.4 mmol, 1.2 equiv) was added to the solution and resulting mixture was stirred at the room temperature for 6 h. On complete consumption of starting material as indicated by TLC, the reaction mixture was quenched by adding saturated aq. NH<sub>4</sub>Cl solution. The aqueous layer was extracted with ethylacetate (2 x 10 mL), the combined organic layers were dried over Na<sub>2</sub>SO<sub>4</sub>, and evaporated under reduced pressure. The crude residue was purified by silica gel column chromatography using hexane-ethylacetate as eluent. Next, in an oven-dried 10 mL Schlenk tube, the isolated carbonate compound and Lawesson reagent (1.2 g, 3.0 mmol, 1.5 equiv) were taken, and dissolved in 4 mL of anhydrous toluene. The resulting mixture was allowed to stir in a preheated oil bath at 120 °C until complete consumption of the starting material (monitored by TLC). The mixture was cooled down to room temperature and solvent was evaporated under *vacuo*. The product **1g** (311 mg, 1.7 mmol, 85%) was isolated as a yellow liquid after column chromatography on silica gel by using 3% ethylacetate in hexane as eluent. <sup>1</sup>H NMR (400 MHz, CDCl<sub>3</sub>): δ (ppm) 6.98 (t, *J* = 2.0 Hz, 2H), 6.23 (t, *J* = 2.0 Hz, 2H), 3.75 (q, *J* = 7.1 Hz, 4H), 1.30 (t, *J* = 7.2 Hz, 6H). <sup>13</sup>C NMR (101 MHz, CDCl<sub>3</sub>): δ (ppm) 183.3, 121.7, 110.8, 47.4, 12.7. HRMS (ESI): calculated for C<sub>9</sub>H<sub>15</sub>N<sub>2</sub>S ([M+H]<sup>+</sup>): 183.0950; found 183.0946.

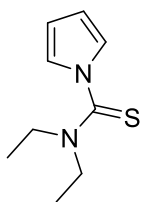

### ***N,N*-Diisopropyl-1*H*-pyrrole-1-carbothioamide (1h):**

In an oven-dried 25 mL round bottom flask, pyrrole (134 mg, 2.0 mmol, 1.0 equiv) was taken and dissolved in 5 mL of anhydrous THF. The resulting solution was cooled down to 0 °C and sodium hydride (96 mg, 2.4 mmol, 1.2 equiv, 60% in mineral oil) was added in small portions. After hydrogen evolution was ceased, diisopropylcarbamoyl chloride (393 mg, 2.4 mmol, 1.2 equiv) was added to the solution and resulting mixture was stirred at the room temperature for 6 h. On complete consumption of starting material as indicated by TLC, the reaction mixture was quenched by adding saturated aq. NH<sub>4</sub>Cl solution. The aqueous layer was extracted with ethylacetate (2 x 10 mL), the combined organic layers were dried over Na<sub>2</sub>SO<sub>4</sub>, and evaporated under reduced pressure. The crude residue was purified by silica gel column chromatography using hexane-ethylacetate as eluent. Next, in an oven-dried 10 mL Schlenk tube, the isolated carbonate

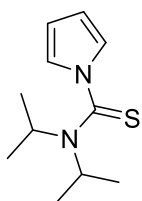

compound and Lawesson reagent (1.2 g, 3.0 mmol, 1.5 equiv) were taken, and dissolved in 4 mL of anhydrous toluene. The resulting mixture was allowed to stir in a preheated oil bath at 120 °C until complete consumption of the starting material (monitored by TLC). The mixture was cooled down to room temperature and solvent was evaporated under *vacuo*. The product **1h** (317 mg, 1.5 mmol, 75%) was isolated as a yellow liquid after column chromatography on silica gel by using 3% ethylacetate in hexane as eluent. <sup>1</sup>H NMR (400 MHz, CDCl<sub>3</sub>): δ (ppm) 6.93 (t, *J* = 2.2 Hz, 2H), 6.21 (t, *J* = 2.2 Hz, 2H), 4.14 (sept, *J* = 6.7 Hz, 2H), 1.45 (d, *J* = 6.8 Hz, 12H). <sup>13</sup>C NMR (101 MHz, CDCl<sub>3</sub>): δ (ppm) 182.5, 121.6, 110.3, 53.4, 20.8. HRMS (ESI): calculated for C<sub>11</sub>H<sub>19</sub>N<sub>2</sub>S ([M+H]<sup>+</sup>): 211.1263; found 211.1266.

**Table S1. Optimization Table for C–H Aminocarbonylation<sup>a,b</sup>**

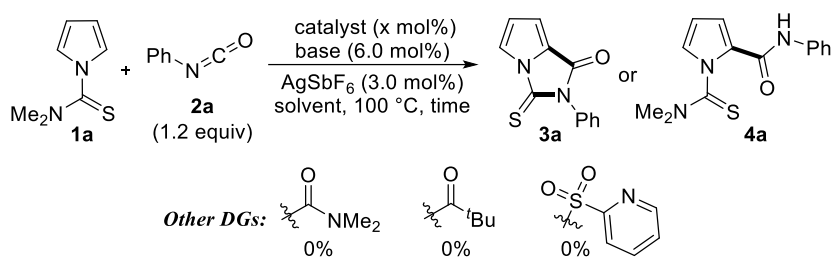

| entry | catalyst (mol %)                                            | base (mol %) | solvent                          | time (h) | yield <b>4a/3a</b> (%) |
|-------|-------------------------------------------------------------|--------------|----------------------------------|----------|------------------------|
| 1     | Cp*Co(CO)I <sub>2</sub> (1.5)                               | NaOAc (6)    | DCE                              | 26       | 50/<5                  |
| 2     | Cp*Co(CO)I <sub>2</sub> (1.5)                               | NaOAc (6)    | C <sub>6</sub> H <sub>5</sub> Cl | 26       | 73/0                   |
| 3     | Cp*Co(CO)I <sub>2</sub> (1.5)                               | NaOAc (6)    | CHCl <sub>3</sub>                | 26       | 20/0                   |
| 4     | Cp*Co(CO)I <sub>2</sub> (1.5)                               | NaOAc (6)    | TFE                              | 26       | 0/0                    |
| 5     | Cp*Co(CO)I <sub>2</sub> (1.5)                               | NaOAc (6)    | THF                              | 26       | 61/<5                  |
| 6     | Cp*Co(CO)I <sub>2</sub> (1.5)                               | NaOAc (6)    | toluene                          | 26       | 43/<5                  |
| 7     | Cp*Co(CO)I <sub>2</sub> (1.5)                               | NaOAc (6)    | TCE                              | 26       | 88/0                   |
| 8     | Cp*Co(CO)I <sub>2</sub> (1.0)                               | NaOAc (6)    | TCE                              | 48       | 55/10                  |
| 9     | Cp*Co(CO)I <sub>2</sub> (1.5)                               | KOAc (6)     | TCE                              | 26       | 45/<5                  |
| 10    | Cp*Co(CO)I <sub>2</sub> (1.5)                               | NaOPiv (6)   | TCE                              | 26       | 82/0                   |
| 11    | [Cp*CoCl <sub>2</sub> ] <sub>2</sub> (0.75)                 | NaOAc (6)    | TCE                              | 26       | 46/0                   |
| 12    | [Cp*RhCl <sub>2</sub> ] <sub>2</sub> (0.75)                 | NaOAc (6)    | TCE                              | 26       | <5/0                   |
| 13    | [Cp*IrCl <sub>2</sub> ] <sub>2</sub> (0.75)                 | NaOAc (6)    | TCE                              | 26       | 0/0                    |
| 14    | [Ru( <i>p</i> -cymene)Cl <sub>2</sub> ] <sub>2</sub> (0.75) | NaOAc (6)    | TCE                              | 26       | 0/0                    |
| 15    | Cp*Co(CO)I <sub>2</sub> (1.5)                               | NaOAc (6)    | TCE                              | 36       | 0/87                   |

<sup>a</sup>Reaction conditions: **1a** (0.20 mmol), **2a** (0.24 mmol), cat. (0.75-1.5 mol %), base (6.0 mol %), AgSbF<sub>6</sub> (3.0 mol %), solvent (1.5 mL), 100 °C, time. <sup>b</sup>Isolated yield.

The optimization study was initiated on the substrate **1a** by employing 1.5 mol % of Cp\*Co(CO)I<sub>2</sub> as catalyst, 3.0 mol % of AgSbF<sub>6</sub> as additive, 6.0 mol % of NaOAc as base, and phenyl isocyanate **2a** as aminocarbonylating agent in 1.5 mL of DCE solvent. To our delight in our first attempt aminocarbonylated product **4a** was isolated in 50%

yield along with a trace amount of cyclized product **3a** (Table 1, entry 1). At first, screening of both polar and non-polar solvents led to the identification of 1,1,2,2-tetrachloroethane (TCE) as the optimal solvent to provide **4a** exclusively in 88% yield (entries 2-7). Upon decreasing the catalyst loading yield of **4a** was reduced to 55%, and formation of **3a** was also observed (entry 8). Changing the base has a detrimental effect on yield (entries 9-10). Employment of other congeners of cobalt-catalyst and Ru(II)-based catalyst found to be ineffective (entries 11-14). To our elation, exclusive formation of **3a** was observed by extending the reaction time to 36 h (87% yield). Furthermore, other directing groups, viz, carbamate, pivaloyl, and sulfonyl-pyridine failed to provide any product under the optimized conditions.

### General Procedure II (GP II):

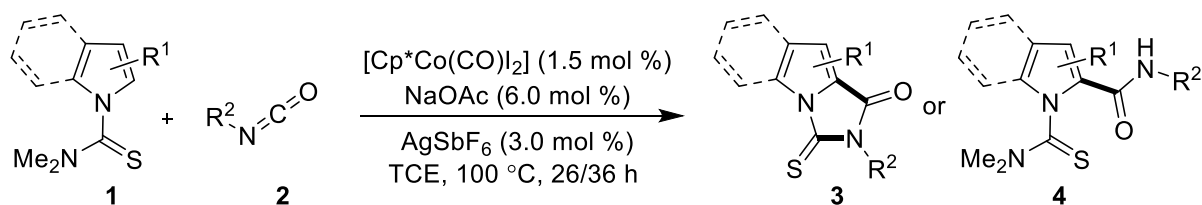

The pyrrolyl/indolyl thiocarbamates **1** (0.20 mmol, 1.0 equiv) was taken in a 15.0 mL screw capped sealed tube. Then catalyst Cp\*Co(CO)<sub>2</sub> (1.4 mg, 0.003 mmol, 1.5 mol %), NaOAc (1.0 mg, 0.012 mmol, 6.0 mol %), and AgSbF<sub>6</sub> (2.1 mg, 0.006 mmol, 3.0 mol %) were added successively to the reaction mixture. After that, the isocyanate **2** (0.24 mmol, 1.2 equiv) followed by 1.5 mL of 1,1,2,2-tetrachloroethane were added to the reaction mixture and allowed to stir in a preheated oil bath at 100 °C. In general, to get the product **3** reaction was conducted over 36 h and for product **4** reaction time is 26 h. On completion of the reaction as indicated by TLC, the crude residue was diluted with ethylacetate, and carefully transferred to a round bottom flask. After evaporating the solvent in *vacuo*, the crude product **3/4** was purified by silica gel column chromatography by using 1-22% ethylacetate in hexane as eluent.

### 2-Phenyl-3-thioxo-2,3-dihydro-1H-pyrrolo[1,2-*c*]imidazol-1-one (**3a**):

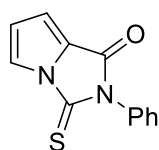

The titled compound **3a** was synthesized according to the **GP II** by using *N,N*-dimethyl-1*H*-pyrrole-1-carbothioamide (30.8 mg, 0.20 mmol, 1.0 equiv) and isocyanatobenzene (28.6 mg, 0.24 mmol, 1.2 equiv). The product **3a** (39.9 mg, 0.17 mmol, 87%) was isolated as a yellow solid after column chromatography on silica gel by using 2% ethylacetate in hexane as eluent. <sup>1</sup>H NMR (400 MHz, CDCl<sub>3</sub>): δ (ppm) 7.55-7.46 (m, 4H), 7.38 (d, *J* = 7.6 Hz, 2H), 6.88 (d, *J* = 2.8 Hz, 1H), 6.49 (t, *J* = 3.2 Hz,

1H). <sup>13</sup>C NMR (101 MHz, CDCl<sub>3</sub>): δ (ppm) 174.4, 158.2, 132.5, 129.42, 129.35, 128.5, 122.9, 120.2, 117.9, 114.6. FTIR: ν<sub>max</sub> (neat)/ cm<sup>-1</sup> = 1755, 1557, 1501, 1421, 1342, 1236, 1143, 1046, 828, 725. HRMS (ESI): calculated for C<sub>12</sub>H<sub>9</sub>N<sub>2</sub>OS ([M+H]<sup>+</sup>): 229.0430; found 229.0431.

### 2-(4-Bromophenyl)-3-thioxo-2,3-dihydro-1H-pyrrolo[1,2-c]imidazol-1-one (3b):

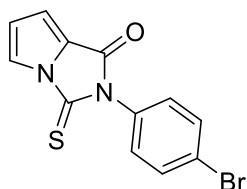

The titled compound **3b** was synthesized according to the **GP II** by using *N,N*-dimethyl-1*H*-pyrrole-1-carbothioamide (30.8 mg, 0.20 mmol, 1.0 equiv) and 1-bromo-4-isocyanatobenzene (47.5 mg, 0.24 mmol, 1.2 equiv). The product **3b** (40 mg, 0.13 mmol, 65%) was isolated as a yellow solid after column chromatography on silica gel by using 3% ethylacetate in hexane as eluent. Here reaction was conducted over 24 h. <sup>1</sup>H NMR (500 MHz, CDCl<sub>3</sub>): δ (ppm) 7.63 (d, *J* = 8.5 Hz, 2H), 7.48 (d, *J* = 2.5 Hz, 1H), 7.25 (d, *J* = 9.0 Hz, 2H), 6.87 (d, *J* = 3.0 Hz, 1H), 6.47 (t, *J* = 3.0 Hz, 1H). <sup>13</sup>C NMR (126 MHz, CDCl<sub>3</sub>): δ (ppm) 173.9, 157.8, 132.6, 131.5, 130.0, 123.5, 122.8, 120.3, 118.1, 114.8. FTIR: ν<sub>max</sub> (neat)/ cm<sup>-1</sup> = 1760, 1556, 1492, 1413, 1339, 1235, 1133, 1037, 815, 745. HRMS (ESI): calculated for C<sub>12</sub>H<sub>8</sub>BrN<sub>2</sub>OS ([M+H]<sup>+</sup>): 306.9535; found 306.9538.

### Ethyl 4-(1-oxo-3-thioxo-1H-pyrrolo[1,2-c]imidazol-2(3H)-yl)benzoate (3c):

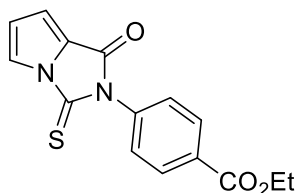

The titled compound **3c** was synthesized according to the **GP II** by using *N,N*-dimethyl-1*H*-pyrrole-1-carbothioamide (30.8 mg, 0.20 mmol, 1.0 equiv) and ethyl 4-isocyanatobenzoate (45.9 mg, 0.24 mmol, 1.2 equiv). The product **3c** (45 mg, 0.15 mmol, 75%) was isolated as a yellow solid after column chromatography on silica gel by using 5% ethylacetate in hexane as eluent. Here reaction was conducted over 24 h. <sup>1</sup>H NMR (500 MHz, CDCl<sub>3</sub>): δ (ppm) 8.20 (d, *J* = 8.0 Hz, 2H), 7.54-7.52 (m, 1H), 7.49 (d, *J* = 7.5 Hz, 2H), 6.92-6.89 (m, 1H), 6.53-6.48 (m, 1H), 4.41 (q, *J* = 7.0 Hz, 2H), 1.41 (t, *J* = 7.0 Hz, 3H). <sup>13</sup>C NMR (101 MHz, CDCl<sub>3</sub>): δ (ppm) 173.7, 165.8, 157.7, 136.3, 131.2, 130.6, 128.4, 122.8, 120.3, 118.1, 114.9, 61.5, 14.5. FTIR: ν<sub>max</sub> (neat)/ cm<sup>-1</sup> = 1754, 1708, 1608, 1556, 1509, 1424, 1336, 1280, 1106, 1049, 819, 743. HRMS (ESI): calculated for C<sub>15</sub>H<sub>12</sub>N<sub>2</sub>NaO<sub>3</sub>S ([M+Na]<sup>+</sup>): 323.0461; found 323.0463.

### 2-(Naphthalen-2-yl)-3-thioxo-2,3-dihydro-1H-pyrrolo[1,2-c]imidazol-1-one (3d):

The titled compound **3d** was synthesized according to the **GP II** by using *N,N*-dimethyl-1*H*-pyrrole-1-carbothioamide (30.8 mg, 0.20 mmol, 1.0 equiv) and 2-isocyanatonaphthalene (40.6 mg, 0.24 mmol, 1.2 equiv). The product **3d** (47.5 mg, 0.17 mmol, 85%) was isolated as a yellow solid after column chromatography on silica gel by using 3% ethylacetate in hexane as eluent.



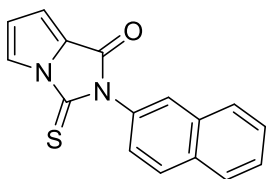

**<sup>1</sup>H NMR** (500 MHz, CDCl<sub>3</sub>): δ (ppm) 7.98 (d, *J* = 9.0 Hz, 1H), 7.92-7.89 (m, 3H), 7.59-7.55 (m, 2H), 7.53 (d, *J* = 2.5 Hz, 1H), 7.47 (dd, *J* = 8.5, 2.0 Hz, 1H), 6.91 (d, *J* = 3.5 Hz, 1H), 6.50 (t, *J* = 3.3 Hz, 1H). **<sup>13</sup>C NMR** (126 MHz, CDCl<sub>3</sub>): δ (ppm) 174.5, 158.3, 133.33, 133.30, 129.9, 129.3, 128.4, 128.0, 127.9, 127.4, 126.9, 125.5, 123.1, 120.2, 117.9, 114.6. **FTIR**: ν<sub>max</sub> (neat)/ cm<sup>-1</sup> = 1748, 1556, 1421, 1325, 1127, 1041, 824, 781, 741. **HRMS (ESI)**: calculated for C<sub>16</sub>H<sub>10</sub>N<sub>2</sub>NaOS ([M+Na]<sup>+</sup>): 301.0406; found 301.0401.

**(*E*)-2-Styryl-3-thioxo-2,3-dihydro-1*H*-pyrrolo[1,2-*c*]imidazol-1-one (3e):**

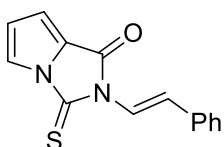

The titled compound **3e** was synthesized according to the **GP II** by using *N,N*-dimethyl-1*H*-pyrrole-1-carbothioamide (30.8 mg, 0.20 mmol, 1.0 equiv) and (*E*)-(2-isocyanatovinyl)benzene (34.8 mg, 0.24 mmol, 1.2 equiv). The product **3e** (41.3 mg, 0.16 mmol, 81%) was isolated as a yellow sticky solid after column chromatography on silica gel by using 1.5% ethylacetate in hexane as eluent. **<sup>1</sup>H NMR** (500 MHz, CDCl<sub>3</sub>): δ (ppm) 7.60 (d, *J* = 15.0 Hz, 1H), 7.45-7.42 (m, 4H), 7.34 (t, *J* = 7.8 Hz, 2H), 7.26 (d, *J* = 8.3 Hz, 1H), 6.84 (d, *J* = 3.5 Hz, 1H), 6.43 (t, *J* = 3.3 Hz, 1H). **<sup>13</sup>C NMR** (126 MHz, CDCl<sub>3</sub>): δ (ppm) 172.3, 157.3, 135.6, 128.9, 128.1, 126.6, 122.8, 120.2, 119.9, 118.1, 114.9. **FTIR**: ν<sub>max</sub> (neat)/ cm<sup>-1</sup> = 2923, 1747, 1557, 1419, 1347, 1235, 1130, 1008, 949, 884, 740. **HRMS (ESI)**: calculated for C<sub>14</sub>H<sub>11</sub>N<sub>2</sub>OS ([M+H]<sup>+</sup>): 255.0587; found 255.0584.

**2,6-Diphenyl-3-thioxo-2,3-dihydro-1*H*-pyrrolo[1,2-*c*]imidazol-1-one (3f):**

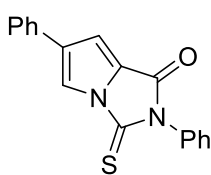

The titled compound **3f** was synthesized according to the **GP II** by using *N,N*-dimethyl-3-phenyl-1*H*-pyrrole-1-carbothioamide (46.0 mg, 0.20 mmol, 1.0 equiv) and isocyanatobenzene (28.6 mg, 0.24 mmol, 1.2 equiv). The product **3f** (39.6 mg, 0.13 mmol, 65%) was isolated as a yellow solid after column chromatography on silica gel by using 3% ethylacetate in hexane as eluent. **<sup>1</sup>H NMR** (400 MHz, CDCl<sub>3</sub>): δ (ppm) 7.76 (s, 1H), 7.57 (d, *J* = 7.6 Hz, 2H), 7.54 (d, *J* = 7.6 Hz, 2H), 7.49 (t, *J* = 7.4 Hz, 1H), 7.46-7.39 (m, 4H), 7.35 (t, *J* = 7.4 Hz, 1H), 7.18 (s, 1H). **<sup>13</sup>C NMR** (101 MHz, CDCl<sub>3</sub>): δ (ppm) 174.1, 158.3, 134.1, 132.53, 132.48, 129.5, 129.4, 129.2, 128.5, 128.1, 125.9, 123.5, 115.6, 112.4. **FTIR**: ν<sub>max</sub> (neat)/ cm<sup>-1</sup> = 1740, 1567, 1451, 1366, 1284, 1177, 1095, 1022, 826, 755. **HRMS (ESI)**: calculated for C<sub>18</sub>H<sub>13</sub>N<sub>2</sub>OS ([M+H]<sup>+</sup>): 305.0743; found 305.0734.

### 6-(Naphthalen-1-yl)-2-phenyl-3-thioxo-2,3-dihydro-1H-pyrrolo[1,2-c]imidazol-1-one

(3g):

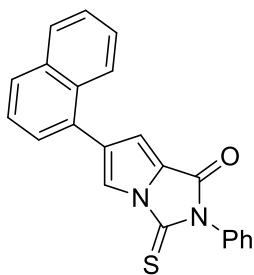

The titled compound **3g** was synthesized according to the **GP II** by using *N,N*-dimethyl-3-(naphthalen-1-yl)-1*H*-pyrrole-1-carbothioamide (56.1 mg, 0.20 mmol, 1.0 equiv) and isocyanatobenzene (28.6 mg, 0.24 mmol, 1.2 equiv). The product **3g** (50.3 mg, 0.14 mmol, 71%) was isolated as a yellow solid after column chromatography on silica gel by using 5% ethylacetate in hexane as eluent. **<sup>1</sup>H NMR** (500 MHz, CDCl<sub>3</sub>): δ (ppm) 8.15-8.13 (m, 1H), 7.95-7.93 (m, 1H), 7.90 (t, *J* = 4.8 Hz, 1H), 7.72 (s, 1H), 7.58-7.51 (m, 7H), 7.44 (d, *J* = 7.5 Hz, 2H), 7.16 (s, 1H). **<sup>13</sup>C NMR** (126 MHz, CDCl<sub>3</sub>): δ (ppm) 174.3, 158.4, 134.1, 132.8, 132.7, 131.5, 131.0, 129.5, 129.4, 128.9, 128.8, 128.5, 127.2, 126.9, 126.4, 125.6, 125.3, 123.0, 118.5, 115.9. **FTIR**: ν<sub>max</sub> (neat)/ cm<sup>-1</sup> = 1748, 1570, 1496, 1380, 1284, 1079, 998, 919, 790, 727. **HRMS (ESI)**: calculated for C<sub>22</sub>H<sub>15</sub>N<sub>2</sub>OS ([**M+H**]<sup>+</sup>): 355.0900; found 355.0907.

### 6-Benzyl-2-phenyl-3-thioxo-2,3-dihydro-1H-pyrrolo[1,2-c]imidazol-1-one (3h):

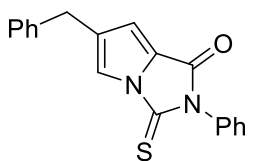

The titled compound **3h** was synthesized according to the **GP II** by using 3-benzyl-*N,N*-dimethyl-1*H*-pyrrole-1-carbothioamide (48.9 mg, 0.20 mmol, 1.0 equiv) and isocyanatobenzene (28.6 mg, 0.24 mmol, 1.2 equiv). The product **3h** (43.4 mg, 0.14 mmol, 68%) was isolated as a yellow solid after column chromatography on silica gel by using 2% ethylacetate in hexane as eluent. Here reaction was conducted over 48 h. **<sup>1</sup>H NMR** (500 MHz, CDCl<sub>3</sub>): δ (ppm) 7.50 (t, *J* = 7.3 Hz, 2H), 7.44 (t, *J* = 7.3 Hz, 1H), 7.35-7.33 (m, 3H), 7.31 (s, 1H), 7.25-7.23 (m, 4H), 6.69 (s, 1H), 3.85 (s, 2H). **<sup>13</sup>C NMR** (126 MHz, CDCl<sub>3</sub>): δ (ppm) 174.3, 158.2, 139.4, 133.6, 132.6, 129.3, 128.9, 128.7, 128.5, 126.8, 123.1, 117.9, 115.2, 33.5. **FTIR**: ν<sub>max</sub> (neat)/ cm<sup>-1</sup> = 1738, 1495, 1389, 1345, 1273, 1122, 1071, 786, 730. **HRMS (ESI)**: calculated for C<sub>19</sub>H<sub>15</sub>N<sub>2</sub>OS ([**M+H**]<sup>+</sup>): 319.0900; found 319.0897.

### 6-Ethyl-2-phenyl-3-thioxo-2,3-dihydro-1H-pyrrolo[1,2-c]imidazol-1-one (3i):

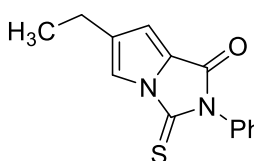

The titled compound **3i** was synthesized according to the **GP II** by using 3-ethyl-*N,N*-dimethyl-1*H*-pyrrole-1-carbothioamide (36.5 mg, 0.20 mmol, 1.0 equiv) and isocyanatobenzene (28.6 mg, 0.24 mmol, 1.2 equiv). The product **3i** (45 mg, 0.18 mmol, 88%) was isolated as a yellow solid after column chromatography on silica gel by using 2% ethylacetate in hexane as eluent. **<sup>1</sup>H NMR** (400 MHz, CDCl<sub>3</sub>): δ (ppm) 7.52 (t, *J* = 7.2 Hz, 2H), 7.46 (t, *J* = 7.2 Hz, 1H),

7.37 (d,  $J = 7.2$  Hz, 2H), 7.29 (s, 1H), 6.75 (s, 1H), 2.55 (q,  $J = 7.5$  Hz, 2H), 1.25 (t,  $J = 7.6$  Hz, 3H).  $^{13}\text{C}$  NMR (101 MHz,  $\text{CDCl}_3$ ):  $\delta$  (ppm) 174.4, 158.4, 136.3, 132.7, 129.3, 128.5, 122.9, 117.0, 115.0, 20.4, 14.5. FTIR:  $\nu_{\text{max}}$  (neat)/  $\text{cm}^{-1} = 2963, 1749, 1589, 1496, 1345, 1129, 1070, 834, 726$ . HRMS (ESI): calculated for  $\text{C}_{14}\text{H}_{12}\text{N}_2\text{NaOS}$  ( $[\text{M}+\text{Na}]^+$ ): 279.0563; found 279.0571.

**6-(2,6-Dimethylhept-5-en-1-yl)-2-phenyl-3-thioxo-2,3-dihydro-1H-pyrrolo[1,2-c]imidazol-1-one (3j):**

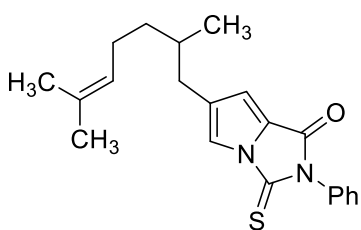

The titled compound **3j** was synthesized according to the **GP II** by using 3-(2,6-dimethylhept-5-en-1-yl)-*N,N*-dimethyl-1*H*-pyrrole-1-carbothioamide (55.7 mg, 0.20 mmol, 1.0 equiv) and isocyanatobenzene (28.6 mg, 0.24 mmol, 1.2 equiv). The product **3j** (50.3 mg, 0.14 mmol, 71%) was isolated as a yellow

liquid after column chromatography on silica gel by using 1% ethylacetate in hexane as eluent.

$^1\text{H}$  NMR (500 MHz,  $\text{CDCl}_3$ ):  $\delta$  (ppm) 7.52 (t,  $J = 7.5$  Hz, 2H), 7.46 (t,  $J = 7.5$  Hz, 1H), 7.38 (d,  $J = 7.5$  Hz, 2H), 7.27 (s, 1H), 6.71 (s, 1H), 5.11 (t,  $J = 7.0$  Hz, 1H), 2.52 (dd,  $J = 14.5, 6.0$  Hz, 1H), 2.33 (dd,  $J = 14.3, 7.8$  Hz, 1H), 2.12-2.05 (m, 1H), 2.04-1.96 (m, 1H), 1.75-1.72 (m, 1H), 1.71 (s, 3H), 1.63 (s, 3H), 1.46-1.39 (m, 1H), 1.27-1.18 (m, 1H), 0.95 (d,  $J = 6.5$  Hz, 3H).  $^{13}\text{C}$  NMR (126 MHz,  $\text{CDCl}_3$ ):  $\delta$  (ppm) 174.4, 158.3, 133.3, 132.7, 131.7, 129.29, 129.27, 128.5, 124.6, 122.8, 118.1, 115.8, 36.6, 34.6, 33.7, 25.8, 25.7, 19.5, 17.8. FTIR:  $\nu_{\text{max}}$  (neat)/  $\text{cm}^{-1} = 2913, 1746, 1575, 1489, 1392, 1337, 1270, 1125, 1075, 986, 874, 724$ . HRMS (ESI): calculated for  $\text{C}_{21}\text{H}_{25}\text{N}_2\text{OS}$  ( $[\text{M}+\text{H}]^+$ ): 353.1682; found 353.1684.

**7-Methyl-2,6-diphenyl-3-thioxo-2,3-dihydro-1H-pyrrolo[1,2-c]imidazol-1-one (3k):**

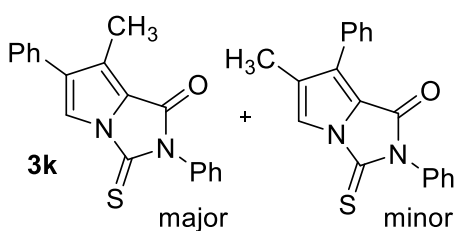

The titled compound **3k** was synthesized according to the **GP II** by using *N,N*,3-trimethyl-4-phenyl-1*H*-pyrrole-1-carbothioamide (48.9 mg, 0.20 mmol, 1.0 equiv) and isocyanatobenzene (28.6 mg, 0.24 mmol, 1.2 equiv). The product **3k** (45.9 mg, 0.14 mmol, 72%, as

an inseparable mixture of regioisomer in 7.1:1 ratio) was isolated as a yellow solid after column chromatography on silica gel by using 1.5% ethylacetate in hexane as eluent.  $^1\text{H}$  NMR (500 MHz,  $\text{CDCl}_3$ ):  $\delta$  (ppm) 7.55 (s, 1H), 7.53 (d,  $J = 8.0$  Hz, 2H), 7.49-7.44 (m, 5H), 7.41-7.38 (m, 3H), 2.44 (s, 3H) (**Major Isomer**).  $^{13}\text{C}$  NMR (126 MHz,  $\text{CDCl}_3$ ):  $\delta$  (ppm) 173.8, 158.7, 134.8, 132.77, 132.76, 129.30, 129.25, 129.0, 128.5, 128.2, 128.0, 127.6, 121.0, 117.2, 11.3 (**Major**

**Isomer**). **FTIR**:  $\nu_{\max}$  (neat)/  $\text{cm}^{-1}$  = 1736, 1594, 1498, 1393, 1279, 1192, 1022, 735. **HRMS (ESI)**: calculated for  $\text{C}_{19}\text{H}_{15}\text{N}_2\text{OS}$  ( $[\text{M}+\text{H}]^+$ ): 319.0900; found 319.0907.

### 6,7-Dimethyl-2-phenyl-3-thioxo-2,3-dihydro-1H-pyrrolo[1,2-c]imidazol-1-one (3l):

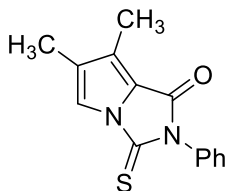

The titled compound **3l** was synthesized according to the **GP II** by using *N,N*,3,4-tetramethyl-1*H*-pyrrole-1-carbothioamide (36.5 mg, 0.20 mmol, 1.0 equiv) and isocyanatobenzene (28.6 mg, 0.24 mmol, 1.2 equiv). The product **3l** (40.2 mg, 0.16 mmol, 78%) was isolated as a yellow solid after column chromatography on silica gel by using 1.5% ethylacetate in hexane as eluent. **<sup>1</sup>H NMR** (500 MHz,  $\text{CDCl}_3$ ):  $\delta$  (ppm) 7.50 (t,  $J = 7.5$  Hz, 2H), 7.44 (t,  $J = 7.3$  Hz, 1H), 7.36 (d,  $J = 7.5$  Hz, 2H), 7.23 (s, 1H), 2.25 (s, 3H), 2.07 (d,  $J = 0.5$  Hz, 3H). **<sup>13</sup>C NMR** (126 MHz,  $\text{CDCl}_3$ ):  $\delta$  (ppm) 173.9, 158.6, 132.9, 129.5, 129.4, 129.2, 129.1, 128.6, 120.4, 117.8, 10.3, 10.1. **FTIR**:  $\nu_{\max}$  (neat)/  $\text{cm}^{-1}$  = 3130, 1744, 1594, 1498, 1415, 1365, 1273, 1215, 1117, 1019, 793, 742. **HRMS (ESI)**: calculated for  $\text{C}_{14}\text{H}_{12}\text{N}_2\text{NaOS}$  ( $[\text{M}+\text{Na}]^+$ ): 279.0563; found 279.0557.

### 2-Phenyl-3-thioxo-2,3-dihydro-1H-imidazo[1,5-a]indol-1-one (3m):

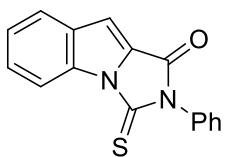

The titled compound **3m** was synthesized according to the **GP II** by using *N,N*-dimethyl-1*H*-indole-1-carbothioamide (40.9 mg, 0.20 mmol, 1.0 equiv) and isocyanatobenzene (28.6 mg, 0.24 mmol, 1.2 equiv). The product **3m** (30.1 mg, 0.11 mmol, 54%) was isolated as a yellow solid after column chromatography on silica gel by using 3% ethylacetate in hexane as eluent. Here 3.0 mol % of  $\text{Cp}^*\text{Co}(\text{CO})\text{I}_2$ , 6.0 mol %  $\text{AgSbF}_6$ , 12.0 mol %  $\text{NaOAc}$  were used and reaction was conducted over 48 h. **<sup>1</sup>H NMR** (500 MHz,  $\text{CDCl}_3$ ):  $\delta$  (ppm) 8.48 (d,  $J = 8.5$  Hz, 1H), 7.75 (d,  $J = 8.0$  Hz, 1H), 7.59-7.54 (m, 3H), 7.50 (t,  $J = 7.5$  Hz, 1H), 7.43-7.41 (m, 2H), 7.37 (t,  $J = 8.0$  Hz, 1H), 7.21 (s, 1H). **<sup>13</sup>C NMR** (126 MHz,  $\text{CDCl}_3$ ):  $\delta$  (ppm) 173.2, 158.8, 134.4, 132.8, 132.5, 130.0, 129.6, 129.4, 128.8, 128.1, 125.3, 124.7, 114.8, 109.7. **FTIR**:  $\nu_{\max}$  (neat)/  $\text{cm}^{-1}$  = 2922, 1732, 1568, 1492, 1439, 1386, 1323, 1255, 1145, 1080, 961, 825, 729. **HRMS (ESI)**: calculated for  $\text{C}_{16}\text{H}_{11}\text{N}_2\text{OS}$  ( $[\text{M}+\text{H}]^+$ ): 279.0587; found 279.0586.

### Ethyl 4-(1-oxo-3-thioxo-1H-imidazo[1,5-a]indol-2(3H)-yl)benzoate (3n):

The titled compound **3n** was synthesized according to the **GP II** by using *N,N*-dimethyl-1*H*-indole-1-carbothioamide (40.9 mg, 0.20 mmol, 1.0 equiv) and ethyl 4-isocyanatobenzoate (46 mg, 0.24 mmol, 1.2 equiv). The product **3n** (44.2 mg, 0.13 mmol, 63%) was isolated as a yellow solid after column chromatography on silica gel by using 8% ethylacetate in hexane as eluent.

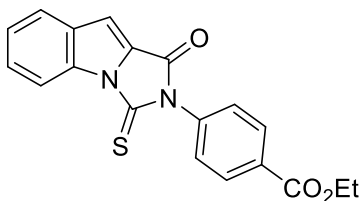

**<sup>1</sup>H NMR** (500 MHz, CDCl<sub>3</sub>): δ (ppm) 8.47 (d, *J* = 8.5 Hz, 1H), 8.22 (d, *J* = 9.0 Hz, 2H), 7.75 (d, *J* = 8.0 Hz, 1H), 7.58 (t, *J* = 8.3 Hz, 1H), 7.52 (d, *J* = 8.5 Hz, 2H), 7.37 (t, *J* = 8.0 Hz, 1H), 7.22 (s, 1H), 4.42 (q, *J* = 7.2 Hz, 2H), 1.42 (t, *J* = 7.0 Hz, 3H).

**<sup>13</sup>C NMR** (126 MHz, CDCl<sub>3</sub>): δ (ppm) 172.4, 165.8, 158.3,

136.2, 134.4, 132.8, 131.4, 130.6, 130.1, 128.7, 127.9, 125.4, 124.8, 114.8, 110.0, 61.5, 14.5.

**FTIR:**  $\nu_{\max}$  (neat)/ cm<sup>-1</sup> = 1746, 1722, 1608, 1563, 1404, 1325, 1277, 1126, 1080, 1026, 960, 828, 745. **HRMS (ESI):** calculated for C<sub>19</sub>H<sub>15</sub>N<sub>2</sub>O<sub>3</sub>S ([M+H]<sup>+</sup>): 351.0798; found 351.0806.

### 1-(Dimethylcarbamothioyl)-*N*-phenyl-1*H*-pyrrole-2-carboxamide (**4a**):

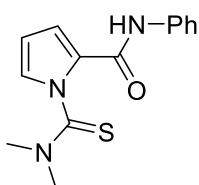

The titled compound **4a** was synthesized according to the **GP II** by using *N,N*-dimethyl-1*H*-pyrrole-1-carbothioamide (30.8 mg, 0.20 mmol, 1.0 equiv) and isocyanatobenzene (28.6 mg, 0.24 mmol, 1.2 equiv). The product **4a** (48.2 mg, 0.18 mmol, 88%) was isolated as a white solid after column

chromatography on silica gel by using 15% ethylacetate in hexane as eluent. **<sup>1</sup>H NMR** (400 MHz, CDCl<sub>3</sub>): δ (ppm) 7.75 (s, 1H), 7.55 (d, *J* = 7.6 Hz, 2H), 7.32 (t, *J* = 7.8 Hz, 2H), 7.10 (t, *J* = 7.4 Hz, 1H), 6.97 (dd, *J* = 2.8, 1.6 Hz, 1H), 6.79 (dd, *J* = 3.8, 1.4 Hz, 1H), 6.30 (t, *J* = 3.2 Hz, 1H), 3.56 (s, 3H), 2.98 (s, 3H). **<sup>13</sup>C NMR** (126 MHz, CDCl<sub>3</sub>): δ (ppm) 182.3, 158.2, 137.9, 129.2, 126.8, 125.8, 124.5, 120.2, 113.6, 110.3, 44.3, 42.0. **FTIR:**  $\nu_{\max}$  (neat)/ cm<sup>-1</sup> = 3291, 2924, 1720, 1596, 1535, 1440, 1389, 1243, 1117, 975, 746. **HRMS (ESI):** calculated for C<sub>14</sub>H<sub>15</sub>N<sub>3</sub>NaOS ([M+Na]<sup>+</sup>): 296.0828; found 296.0828.

### *N*-(4-Bromophenyl)-1-(dimethylcarbamothioyl)-1*H*-pyrrole-2-carboxamide (**4b**):

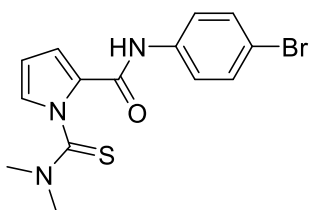

The titled compound **4b** was synthesized according to the **GP II** by using *N,N*-dimethyl-1*H*-pyrrole-1-carbothioamide (30.8 mg, 0.20 mmol, 1.0 equiv) and 1-bromo-4-isocyanatobenzene (47.5 mg, 0.24 mmol, 1.2 equiv). The product **4b** (55.8 mg, 0.16 mmol, 79%) was isolated as a white solid after column chromatography on silica gel

by using 16% ethylacetate in hexane as eluent. Here reaction was conducted over 8 h. **<sup>1</sup>H NMR** (500 MHz, CDCl<sub>3</sub>): δ (ppm) 8.01 (s, 1H), 7.46 (d, *J* = 9.0 Hz, 2H), 7.38 (d, *J* = 9.0 Hz, 2H), 6.85 (dd, *J* = 2.8, 1.8 Hz, 1H), 6.81 (dd, *J* = 3.5, 1.5 Hz, 1H), 6.21 (dd, *J* = 3.5, 3.0 Hz, 1H), 3.55 (s, 3H), 2.93 (s, 3H). **<sup>13</sup>C NMR** (126 MHz, CDCl<sub>3</sub>): δ (ppm) 182.3, 158.1, 137.2, 131.9, 126.3, 125.7, 121.8, 116.8, 114.0, 110.4, 44.2, 42.0. **FTIR:**  $\nu_{\max}$  (neat)/ cm<sup>-1</sup> = 3305, 1765, 1659, 1590, 1534, 1440, 1390, 1297, 1234, 1162, 1090, 904, 824, 722. **HRMS (ESI):** calculated for C<sub>14</sub>H<sub>15</sub>BrN<sub>3</sub>OS ([M+H]<sup>+</sup>): 352.0114; found 352.0108.

#### Ethyl 4-(1-(dimethylcarbamothioyl)-1H-pyrrole-2-carboxamido)benzoate (**4c**):

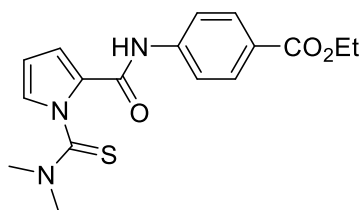

The titled compound **4c** was synthesized according to the **GP II** by using *N,N*-dimethyl-1*H*-pyrrole-1-carbothioamide (30.8 mg, 0.20 mmol, 1.0 equiv) and ethyl 4-isocyanatobenzoate (46 mg, 0.24 mmol, 1.2 equiv). The product **4c** (49.8 mg, 0.14 mmol, 72%) was isolated as a white solid after column chromatography on silica gel by using 22% ethylacetate in hexane as eluent. Here reaction was conducted over 6 h. **<sup>1</sup>H NMR** (500 MHz, CDCl<sub>3</sub>): δ (ppm) 8.27 (s, 1H), 7.95 (d, *J* = 8.5 Hz, 2H), 7.65 (d, *J* = 8.5 Hz, 2H), 6.87 (d, *J* = 3.5 Hz, 1H), 6.85-6.80 (m, 1H), 6.20 (t, *J* = 3.3 Hz, 1H), 4.33 (q, *J* = 7.0 Hz, 2H), 3.56 (s, 3H), 2.93 (s, 3H), 1.36 (t, *J* = 7.3 Hz, 3H). **<sup>13</sup>C NMR** (126 MHz, CDCl<sub>3</sub>): δ (ppm) 182.3, 166.3, 158.1, 142.4, 130.7, 126.2, 125.9, 125.7, 119.2, 114.4, 110.4, 60.9, 44.2, 42.0, 14.4. **FTIR**:  $\nu_{\max}$  (neat)/ cm<sup>-1</sup> = 3270, 1709, 1663, 1593, 1520, 1439, 1393, 1350, 1271, 1167, 1096, 854, 733. **HRMS (ESI)**: calculated for C<sub>17</sub>H<sub>19</sub>N<sub>3</sub>NaO<sub>3</sub>S ([**M**+**Na**]<sup>+</sup>): 368.1039; found 368.1039.

#### *N*-(4-(*tert*-Butyl)phenyl)-1-(dimethylcarbamothioyl)-1H-pyrrole-2-carboxamide (**4d**):

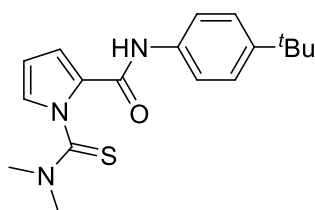

The titled compound **4d** was synthesized according to the **GP II** by using *N,N*-dimethyl-1*H*-pyrrole-1-carbothioamide (30.8 mg, 0.20 mmol, 1.0 equiv) and 1-(*tert*-butyl)-4-isocyanatobenzene (42 mg, 0.24 mmol, 1.2 equiv). The product **4d** (43 mg, 0.13 mmol, 65%) was isolated as a white solid after column chromatography on silica gel by using 13% ethylacetate in hexane as eluent. **<sup>1</sup>H NMR** (500 MHz, CDCl<sub>3</sub>): δ (ppm) 7.78 (s, 1H), 7.46 (d, *J* = 9.0 Hz, 2H), 7.33 (d, *J* = 8.5 Hz, 2H), 7.00-6.93 (m, 1H), 6.78 (dd, *J* = 3.5, 1.5 Hz, 1H), 6.27 (t, *J* = 3.3 Hz, 1H), 3.54 (s, 3H), 2.95 (s, 3H), 1.29 (s, 9H). **<sup>13</sup>C NMR** (126 MHz, CDCl<sub>3</sub>): δ (ppm) 182.3, 158.2, 147.5, 135.2, 127.0, 126.0, 125.7, 120.2, 113.5, 110.2, 44.2, 41.9, 34.5, 31.5. **FTIR**:  $\nu_{\max}$  (neat)/ cm<sup>-1</sup> = 3279, 2963, 1653, 1594, 1520, 1441, 1392, 1297, 1245, 1155, 1086, 979, 832, 733. **HRMS (ESI)**: calculated for C<sub>18</sub>H<sub>23</sub>N<sub>3</sub>NaOS ([**M**+**Na**]<sup>+</sup>): 352.1454; found 352.1442.

#### 1-(Dimethylcarbamothioyl)-*N*-hexyl-1H-pyrrole-2-carboxamide (**4e**):

The titled compound **4e** was synthesized according to the **GP II** by using *N,N*-dimethyl-1*H*-pyrrole-1-carbothioamide (30.8 mg, 0.20 mmol, 1.0 equiv) and 1-isocyanatohexane (30.5 mg, 0.24 mmol, 1.2 equiv). The product **4e** (29 mg, 0.10 mmol, 51%) was isolated as a white solid after column chromatography on silica gel by using 15% ethylacetate in hexane as eluent. Here 3.0 mol % of Cp\*Co(CO)I<sub>2</sub>, 6.0 mol % AgSbF<sub>6</sub>, 12.0 mol % NaOAc were used and reaction

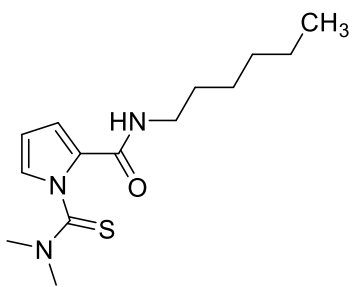

was conducted over 30 h.  $^1\text{H NMR}$  (400 MHz,  $\text{CDCl}_3$ ):  $\delta$  (ppm) 6.93-6.88 (m, 1H), 6.60-6.56 (m, 1H), 6.26-6.20 (m, 1H), 5.93 (s, 1H), 3.56 (s, 3H), 3.38-3.32 (m, 2H), 2.95 (s, 3H), 1.56-1.51 (m, 2H), 1.37-1.25 (m, 6H), 0.91-0.84 (m, 3H).  $^{13}\text{C NMR}$  (126 MHz,  $\text{CDCl}_3$ ):  $\delta$  (ppm) 182.7, 160.4, 127.1, 124.8, 112.4, 110.0, 44.2, 41.9, 39.7, 31.6, 29.9, 26.8, 22.7, 14.1. **FTIR**:  $\nu_{\text{max}}$  (neat)/ $\text{cm}^{-1}$  = 3321, 2927, 1633, 1544, 1439, 1392, 1287, 1152, 1088, 968, 728. **HRMS (ESI)**: calculated for  $\text{C}_{14}\text{H}_{23}\text{N}_3\text{NaOS}$  ( $[\text{M}+\text{Na}]^+$ ): 304.1454; found 304.1459.

#### 1-(Dimethylcarbamothioyl)-*N*-(3-phenylpropyl)-1*H*-pyrrole-2-carboxamide (**4f**):

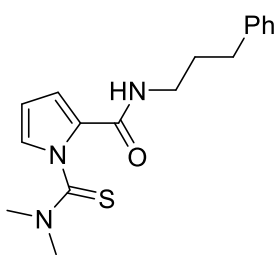

The titled compound **4f** was synthesized according to the **GP II** by using *N,N*-dimethyl-1*H*-pyrrole-1-carbothioamide (30.8 mg, 0.20 mmol, 1.0 equiv) and (3-isocyanatopropyl)benzene (38.7 mg, 0.24 mmol, 1.2 equiv). The product **4f** (31.2 mg, 0.10 mmol, 49%) was isolated as a yellow sticky solid after column chromatography on silica gel by using 30% ethylacetate in hexane as eluent. Here 3.0 mol % of  $\text{Cp}^*\text{Co}(\text{CO})\text{I}_2$ , 6.0 mol %  $\text{AgSbF}_6$ , 12.0 mol %  $\text{NaOAc}$  were used and reaction was conducted over 30 h.  $^1\text{H NMR}$  (400 MHz,  $\text{CDCl}_3$ ):  $\delta$  (ppm) 7.28 (t,  $J = 7.6$  Hz, 2H), 7.21-7.18 (m, 3H), 6.89-6.88 (m, 1H), 6.48 (dd,  $J = 3.8, 1.4$  Hz, 1H), 6.21 (t,  $J = 3.2$  Hz, 1H), 6.03-5.94 (m, 1H), 3.55 (s, 3H), 3.39 (q,  $J = 6.7$  Hz, 2H), 2.93 (s, 3H), 2.68 (t,  $J = 7.8$  Hz, 2H), 1.89 (quint,  $J = 7.4$  Hz, 2H).  $^{13}\text{C NMR}$  (101 MHz,  $\text{CDCl}_3$ ):  $\delta$  (ppm) 182.6, 160.3, 141.5, 128.6, 128.5, 126.8, 126.2, 124.8, 112.5, 110.0, 44.2, 41.9, 39.4, 33.6, 31.4. **HRMS (ESI)**: calculated for  $\text{C}_{17}\text{H}_{22}\text{N}_3\text{OS}$  ( $[\text{M}+\text{H}]^+$ ): 316.1478; found 316.1481.

#### 1-(Dimethylcarbamothioyl)-*N*,4-diphenyl-1*H*-pyrrole-2-carboxamide (**4g**):

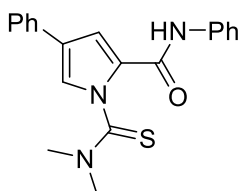

The titled compound **4g** was synthesized according to the **GP II** by using *N,N*-dimethyl-3-phenyl-1*H*-pyrrole-1-carbothioamide (46 mg, 0.20 mmol, 1.0 equiv) and isocyanatobenzene (28.6 mg, 0.24 mmol, 1.2 equiv). The product **4g** (45.6 mg, 0.13 mmol, 65%) was isolated as a white solid after column chromatography on silica gel by using 15% ethylacetate in hexane as eluent. Here reaction was conducted over 30 h.  $^1\text{H NMR}$  (500 MHz,  $\text{CDCl}_3$ ):  $\delta$  (ppm) 7.95 (s, 1H), 7.59 (d,  $J = 8.0$  Hz, 2H), 7.50 (d,  $J = 8.0$  Hz, 2H), 7.39 (t,  $J = 7.8$  Hz, 2H), 7.34 (t,  $J = 7.8$  Hz, 2H), 7.29-7.26 (m, 2H), 7.15-7.12 (m, 2H), 3.61 (s, 3H), 3.07 (s, 3H).  $^{13}\text{C NMR}$  (126 MHz,  $\text{CDCl}_3$ ):  $\delta$  (ppm) 182.0, 158.1, 137.9, 133.5, 129.2, 129.0, 127.6, 127.0, 126.5, 125.5, 124.5, 122.0, 120.3, 111.3, 44.3, 42.2. **FTIR**:  $\nu_{\text{max}}$  (neat)/ $\text{cm}^{-1}$  = 3243, 3117, 1662, 1596, 1536, 1391,

1314, 1249, 988, 819, 751. **HRMS (ESI)**: calculated for C<sub>20</sub>H<sub>19</sub>N<sub>3</sub>NaOS ([M+Na]<sup>+</sup>): 372.1141; found 372.1144.

#### 1-(Dimethylcarbamothioyl)-4-(furan-2-yl)-*N*-phenyl-1*H*-pyrrole-2-carboxamide (**4h**):

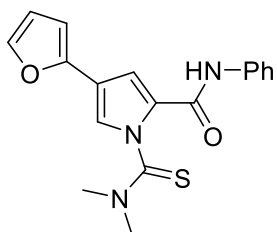

The titled compound **4h** was synthesized according to the **GP II** by using 3-(furan-2-yl)-*N,N*-dimethyl-1*H*-pyrrole-1-carbothioamide (44 mg, 0.20 mmol, 1.0 equiv) and isocyanatobenzene (28.6 mg, 0.24 mmol, 1.2 equiv). The product **4h** (41.7 mg, 0.12 mmol, 61%) was isolated as a white solid after column chromatography on silica gel by using 15% ethylacetate in hexane as eluent. **<sup>1</sup>H NMR** (500 MHz, CDCl<sub>3</sub>): δ (ppm) 7.86 (s, 1H), 7.54 (d, *J* = 8.0 Hz, 2H), 7.39-7.34 (m, 1H), 7.31 (t, *J* = 7.5 Hz, 2H), 7.23-7.17 (m, 1H), 7.11 (t, *J* = 7.3 Hz, 1H), 7.02-6.97 (m, 1H), 6.45-6.39 (m, 1H), 6.37 (d, *J* = 3.0 Hz, 1H), 3.56 (s, 3H), 3.04 (s, 3H). **<sup>13</sup>C NMR** (126 MHz, CDCl<sub>3</sub>): δ (ppm) 181.6, 158.0, 148.9, 141.2, 137.7, 129.2, 127.4, 124.6, 121.3, 120.3, 117.7, 111.4, 110.1, 104.3, 44.3, 42.2. **FTIR**: ν<sub>max</sub> (neat)/cm<sup>-1</sup> = 3297, 2924, 1647, 1596, 1531, 1442, 1380, 1314, 1249, 1154, 954, 753. **HRMS (ESI)**: calculated for C<sub>18</sub>H<sub>18</sub>N<sub>3</sub>O<sub>2</sub>S ([M+H]<sup>+</sup>): 340.1114; found 340.1109.

#### 4-Benzyl-1-(dimethylcarbamothioyl)-*N*-phenyl-1*H*-pyrrole-2-carboxamide (**4i**):

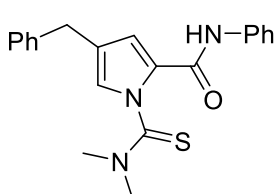

The titled compound **4i** was synthesized according to the **GP II** by using 3-benzyl-*N,N*-dimethyl-1*H*-pyrrole-1-carbothioamide (49 mg, 0.20 mmol, 1.0 equiv) and isocyanatobenzene (28.6 mg, 0.24 mmol, 1.2 equiv). The product **4i** (55.5 mg, 0.15 mmol, 76%) was isolated as a white solid after column chromatography on silica gel by using 12% ethylacetate in hexane as eluent. **<sup>1</sup>H NMR** (500 MHz, CDCl<sub>3</sub>): δ (ppm) 7.69 (s, 1H), 7.52 (d, *J* = 8.0 Hz, 2H), 7.32-7.28 (m, 4H), 7.24-7.22 (m, 3H), 7.09 (t, *J* = 7.5 Hz, 1H), 6.77 (s, 1H), 6.59 (s, 1H), 3.81 (s, 2H), 3.53 (s, 3H), 2.98 (s, 3H). **<sup>13</sup>C NMR** (126 MHz, CDCl<sub>3</sub>): δ (ppm) 182.3, 158.1, 140.6, 137.9, 129.1, 128.8, 128.7, 126.9, 126.4, 125.3, 124.4, 124.0, 120.2, 114.0, 44.2, 42.0, 33.1. **FTIR**: ν<sub>max</sub> (neat)/cm<sup>-1</sup> = 3232, 2926, 1744, 1640, 1599, 1524, 1453, 1390, 1318, 1275, 1147, 973, 754. **HRMS (ESI)**: calculated for C<sub>21</sub>H<sub>21</sub>N<sub>3</sub>NaOS ([M+Na]<sup>+</sup>): 386.1298; found 386.1287.

#### 1-(Dimethylcarbamothioyl)-5-methyl-*N*-phenyl-1*H*-pyrrole-2-carboxamide (**4j**):

The titled compound **4j** was synthesized according to the **GP II** by using *N,N*,2-trimethyl-1*H*-pyrrole-1-carbothioamide (33.7 mg, 0.20 mmol, 1.0 equiv) and isocyanatobenzene (28.6 mg, 0.24 mmol, 1.2 equiv). The product **4j** (24.3 mg, 0.08 mmol, 42%) was isolated as a white solid after column chromatography on silica gel by using 12% ethylacetate in hexane as eluent. Here 3.0 mol % of Cp\*Co(CO)I<sub>2</sub>, 6.0 mol % AgSbF<sub>6</sub>, 12.0 mol % NaOAc were used and reaction



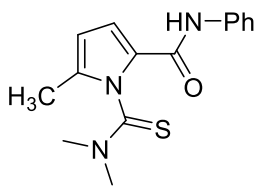

was conducted over 36 h. **<sup>1</sup>H NMR** (400 MHz, CDCl<sub>3</sub>): δ (ppm) 7.78 (s, 1H), 7.52 (d, *J* = 8.0 Hz, 2H), 7.30 (t, *J* = 7.8 Hz, 2H), 7.07 (t, *J* = 7.4 Hz, 1H), 6.73 (d, *J* = 3.6 Hz, 1H), 5.99 (d, *J* = 3.6 Hz, 1H), 3.59 (s, 3H), 2.98 (s, 3H), 2.20 (s, 3H). **<sup>13</sup>C NMR** (101 MHz, CDCl<sub>3</sub>): δ (ppm) 182.1, 158.4, 138.0, 133.4, 129.1, 126.1, 124.1, 120.3, 113.5, 109.0, 43.9, 41.9, 12.0. **FTIR**:  $\nu_{\max}$  (neat)/ cm<sup>-1</sup> = 3268, 1648, 1596, 1523, 1393, 1304, 1249, 1156, 989, 747. **HRMS (ESI)**: calculated for C<sub>15</sub>H<sub>17</sub>N<sub>3</sub>NaOS ([M+Na]<sup>+</sup>): 310.0985; found 310.0971.

### 1-(Dimethylcarbamothioyl)-*N*-phenyl-1*H*-indole-2-carboxamide (**4k**):

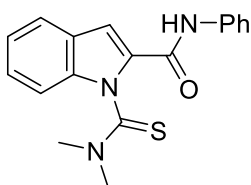

The titled compound **4k** was synthesized according to the **GP II** by using *N,N*-dimethyl-1*H*-indole-1-carbothioamide (41.0 mg, 0.20 mmol, 1.0 equiv) and isocyanatobenzene (28.6 mg, 0.24 mmol, 1.2 equiv). The product **4k** (49.0 mg, 0.15 mmol, 76%) was isolated as a white solid after column chromatography on silica gel by using 15% ethylacetate in hexane as eluent. Here 3.0 mol % of Cp\*Co(CO)I<sub>2</sub>, 6.0 mol % AgSbF<sub>6</sub>, 12.0 mol % NaOAc were used. **<sup>1</sup>H NMR** (400 MHz, CDCl<sub>3</sub>): δ (ppm) 8.10 (s, 1H), 7.64 (d, *J* = 8.0 Hz, 1H), 7.59 (d, *J* = 7.6 Hz, 2H), 7.39-7.32 (m, 3H), 7.29-7.25 (m, 1H), 7.22 (t, *J* = 7.8 Hz, 1H), 7.15-7.13 (m, 2H), 3.68 (s, 3H), 3.14 (s, 3H). **<sup>13</sup>C NMR** (101 MHz, CDCl<sub>3</sub>): δ (ppm) 181.8, 159.2, 137.6, 136.9, 133.4, 129.2, 127.0, 126.2, 124.8, 122.6, 122.5, 120.3, 111.2, 108.2, 44.1, 42.4. **FTIR**:  $\nu_{\max}$  (neat)/ cm<sup>-1</sup> = 3301, 2924, 1651, 1597, 1532, 1442, 1376, 1312, 1243, 1145, 984, 815, 740. **HRMS (ESI)**: calculated for C<sub>18</sub>H<sub>17</sub>N<sub>3</sub>NaOS ([M+Na]<sup>+</sup>): 346.0985; found 346.0985.

**Table S2. Optimization Table for C–H Amidation<sup>a,b</sup>**

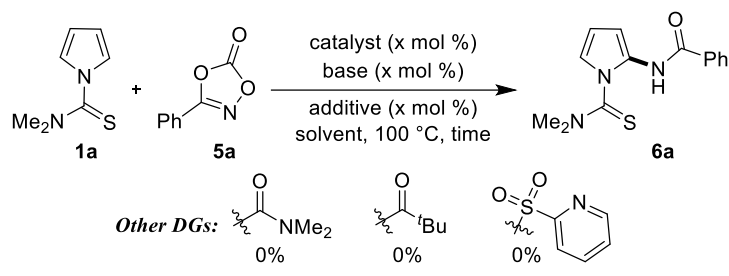

| entry          | catalyst (mol %)                            | base (mol %)             | additive (mol %)               | solvent                                       | time (h)  | yield <b>6a</b> (%)   |
|----------------|---------------------------------------------|--------------------------|--------------------------------|-----------------------------------------------|-----------|-----------------------|
| 1 <sup>c</sup> | Cp*Co(CO)I <sub>2</sub> (5.0)               | NaOAc(30)                | AgSbF <sub>6</sub> (15)        | DCE                                           | 18        | 51                    |
| 2              | Cp*Co(CO)I <sub>2</sub> (5.0)               | NaOAc(30)                | AgSbF <sub>6</sub> (15)        | DCE                                           | 18        | 63                    |
| 3              | Cp*Co(CO)I <sub>2</sub> (1.0)               | NaOAc(10)                | AgSbF <sub>6</sub> (5.0)       | DCE                                           | 18        | 52                    |
| 4              | Cp*Co(CO)I <sub>2</sub> (0.5)               | NaOAc(5)                 | AgSbF <sub>6</sub> (2.5)       | DCE                                           | 18        | 68                    |
| 5              | 0                                           | NaOAc(5)                 | AgSbF <sub>6</sub> (2.5)       | DCE                                           | 18        | 0                     |
| 6              | Cp*Co(CO)I <sub>2</sub> (0.5)               | 0                        | AgSbF <sub>6</sub> (2.5)       | DCE                                           | 18        | 0                     |
| 7              | Cp*Co(CO)I <sub>2</sub> (0.5)               | NaOAc(5)                 | 0                              | DCE                                           | 18        | 0                     |
| 8              | Cp*Co(CO)I <sub>2</sub> (0.5)               | NaOAc(5)                 | AgSbF <sub>6</sub> (2.5)       | DCE                                           | 24        | 73                    |
| 9              | Cp*Co(CO)I <sub>2</sub> (0.5)               | NaOAc(5)                 | AgSbF <sub>6</sub> (2.5)       | CHCl <sub>3</sub>                             | 24        | 66                    |
| 10             | Cp*Co(CO)I <sub>2</sub> (0.5)               | NaOAc(5)                 | AgSbF <sub>6</sub> (2.5)       | C <sub>6</sub> H <sub>5</sub> Cl              | 24        | 63                    |
| 11             | Cp*Co(CO)I <sub>2</sub> (0.5)               | NaOAc(5)                 | AgSbF <sub>6</sub> (2.5)       | C <sub>6</sub> H <sub>5</sub> CF <sub>3</sub> | 24        | 70                    |
| 12             | Cp*Co(CO)I <sub>2</sub> (0.5)               | NaOAc(5)                 | AgSbF <sub>6</sub> (2.5)       | THF                                           | 24        | 0                     |
| <b>13</b>      | <b>Cp*Co(CO)I<sub>2</sub> (0.5)</b>         | <b>NaOAc(5)</b>          | <b>AgSbF<sub>6</sub> (2.5)</b> | <b>TCE</b>                                    | <b>24</b> | <b>95<sup>d</sup></b> |
| 14             | Cp*Co(CO)I <sub>2</sub> (0.5)               | KOAc(5)                  | AgSbF <sub>6</sub> (2.5)       | TCE                                           | 24        | 81                    |
| 15             | Cp*Co(CO)I <sub>2</sub> (0.5)               | Cu(OAc) <sub>2</sub> (5) | AgSbF <sub>6</sub> (2.5)       | TCE                                           | 24        | 0                     |
| 16             | Cp*Co(CO)I <sub>2</sub> (0.5)               | AgOAc(5)                 | AgSbF <sub>6</sub> (2.5)       | TCE                                           | 24        | 0                     |
| 17             | Cp*Co(CO)I <sub>2</sub> (0.5)               | NaOBz(5)                 | AgSbF <sub>6</sub> (2.5)       | TCE                                           | 24        | 91                    |
| 18             | Cp*Co(CO)I <sub>2</sub> (0.5)               | NaOPiv(5)                | AgSbF <sub>6</sub> (2.5)       | TCE                                           | 24        | 90                    |
| 19             | Cp*Co(CO)I <sub>2</sub> (0.5)               | NaOAc(5)                 | AgOTf(5.0)                     | TCE                                           | 24        | 80                    |
| 20             | Cp*Co(CO)I <sub>2</sub> (0.5)               | NaOAc(5)                 | AgBF <sub>4</sub> (5.0)        | TCE                                           | 24        | 67                    |
| 21             | Cp*Co(CO)I <sub>2</sub> (0.5)               | NaOAc(5)                 | AgSbF <sub>6</sub> (2.5)       | TFE                                           | 24        | <5                    |
| <b>22</b>      | <b>Cp*Co(CO)I<sub>2</sub> (0.3)</b>         | <b>NaOAc(3)</b>          | <b>AgSbF<sub>6</sub> (1.5)</b> | <b>TCE</b>                                    | <b>31</b> | <b>75<sup>e</sup></b> |
| 23             | [Cp*CoCl <sub>2</sub> ] <sub>2</sub> (0.25) | NaOAc(5)                 | AgSbF <sub>6</sub> (2.5)       | TCE                                           | 24        | 0                     |
| 24             | [Cp*RhCl <sub>2</sub> ] <sub>2</sub> (0.25) | NaOAc(5)                 | AgSbF <sub>6</sub> (2.5)       | TCE                                           | 24        | 0                     |
| 25             | [Cp*IrCl <sub>2</sub> ] <sub>2</sub> (0.25) | NaOAc(5)                 | AgSbF <sub>6</sub> (2.5)       | TCE                                           | 24        | 0                     |
| 26             | CoI <sub>2</sub> (0.5)                      | NaOAc(5)                 | AgSbF <sub>6</sub> (2.5)       | TCE                                           | 24        | 0                     |

<sup>a</sup>Reaction conditions: **1a** (0.20 mmol), **5a** (0.30 mmol), cat. (0.25–5.0 mol %), additive (1.5–15 mol %), base (3.0–30 mol %), solvent (1.5 mL), 100 °C, time. <sup>b</sup>Isolated yield. <sup>c</sup>Reaction was performed at 90 °C. <sup>d</sup>Average yield of four reactions conducted separately. <sup>e</sup>Average yield of three reactions conducted separately.

### General Procedure III (GP III):

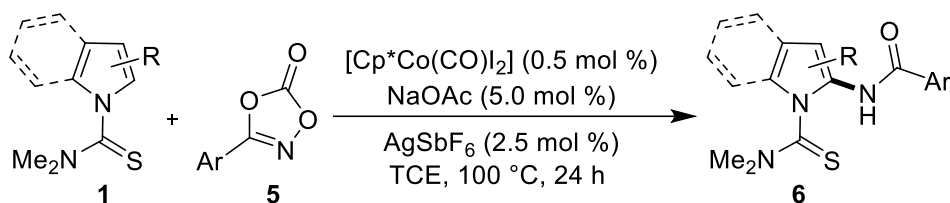

The pyrrolyl/indolyl thiocarbamates **1** (0.20 mmol, 1.0 equiv) was taken in a 15.0 mL screw capped sealed tube. Then catalyst Cp\*Co(CO)I<sub>2</sub> (0.5 mg, 0.001 mmol, 0.5 mol %), NaOAc (0.8 mg, 0.010 mmol, 5.0 mol %), and AgSbF<sub>6</sub> (1.7 mg, 0.005 mmol, 2.5 mol %) were added successively to the reaction mixture. After that, the dioxazolone **5** (0.30 mmol, 1.5 equiv) followed by 1.5 mL of 1,1,2,2-tetrachloroethane were added to the reaction mixture, and the resulting mixture was allowed to stir in a preheated oil bath at 100 °C for 24 h. On completion of the reaction as indicated by TLC, the crude residue was diluted with ethylacetate, and carefully transferred to a round bottom flask. After evaporating the solvent under *vacuo*, the crude product **6** was purified by silica gel column chromatography by using 12-22% ethylacetate in hexane as eluent.

#### *N*-(1-(Dimethylcarbamothioyl)-1*H*-pyrrol-2-yl)benzamide (**6a**):

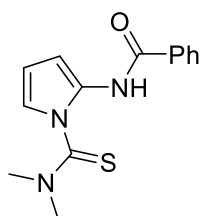

The titled compound **6a** was synthesized according to the **GP III** by using *N,N*-dimethyl-1*H*-pyrrole-1-carbothioamide (30.8 mg, 0.20 mmol, 1.0 equiv) and 3-phenyl-1,4,2-dioxazol-5-one (49 mg, 0.30 mmol, 1.5 equiv). The product **6a** (52.2 mg, 0.19 mmol, 95%) was isolated as a white solid after column chromatography on silica gel by using 22% ethylacetate in hexane as eluent. <sup>1</sup>H NMR (400 MHz, CDCl<sub>3</sub>): δ (ppm) 9.87 (s, 1H), 7.90 (d, *J* = 8.0 Hz, 2H), 7.55-7.45 (m, 3H), 6.65-6.64 (m, 1H), 6.49 (dd, *J* = 3.0, 1.4 Hz, 1H), 6.24 (t, *J* = 3.4 Hz, 1H), 3.37 (s, 6H). <sup>13</sup>C NMR (101 MHz, CDCl<sub>3</sub>): δ (ppm) 181.4, 164.2, 134.0, 132.1, 128.9, 127.8, 127.3, 116.4, 109.8, 103.8, 44.0. FTIR: ν<sub>max</sub> (neat)/ cm<sup>-1</sup> = 3257, 1665, 1576, 1504, 1387, 1273, 1141, 1083, 797. HRMS (ESI): calculated for C<sub>14</sub>H<sub>16</sub>N<sub>3</sub>OS ([M+H]<sup>+</sup>): 274.1009; found 274.1014.

#### *N*-(1-(Dimethylcarbamothioyl)-1*H*-pyrrol-2-yl)-4-methylbenzamide (**6b**):

The titled compound **6b** was synthesized according to the **GP III** by using *N,N*-dimethyl-1*H*-pyrrole-1-carbothioamide (30.8 mg, 0.20 mmol, 1.0 equiv) and 3-(*p*-tolyl)-1,4,2-dioxazol-5-one (53 mg, 0.30 mmol, 1.5 equiv). The product **6b** (55.8 mg, 0.19 mmol, 97%) was isolated as a white solid after column chromatography on silica gel by using 20% ethylacetate in hexane

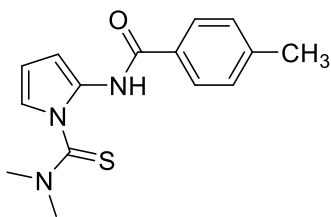

as eluent. **<sup>1</sup>H NMR** (500 MHz, CDCl<sub>3</sub>): δ (ppm) 9.75 (s, 1H), 7.79 (d, *J* = 8.0 Hz, 2H), 7.27 (d, *J* = 7.5 Hz, 2H), 6.63-6.62 (m, 1H), 6.48 (dd, *J* = 3.3, 1.8 Hz, 1H), 6.23 (t, *J* = 3.5 Hz, 1H), 3.37 (s, 6H), 2.41 (s, 3H). **<sup>13</sup>C NMR** (126 MHz, CDCl<sub>3</sub>): δ (ppm) 181.6, 164.3, 142.6, 131.3, 129.6, 127.9, 127.3, 116.3, 109.8, 103.7, 43.9, 21.6. **FTIR**:  $\nu_{\max}$  (neat)/ cm<sup>-1</sup> = 3253, 2921, 1663, 1492, 1392, 1305, 1148, 1079, 889, 713. **HRMS (ESI)**: calculated for C<sub>15</sub>H<sub>17</sub>N<sub>3</sub>NaOS ([M+Na]<sup>+</sup>): 310.0985; found 310.0990.

#### 4-Bromo-*N*-(1-(dimethylcarbamothioyl)-1*H*-pyrrol-2-yl)benzamide (**6c**):

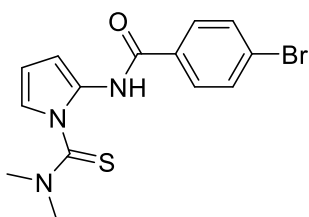

The titled compound **6c** was synthesized according to the **GP III** by using *N,N*-dimethyl-1*H*-pyrrole-1-carbothioamide (30.8 mg, 0.20 mmol, 1.0 equiv) and 3-(4-bromophenyl)-1,4,2-dioxazol-5-one (72.6 mg, 0.30 mmol, 1.5 equiv). The product **6c** (62 mg, 0.18 mmol, 88%) was isolated as a yellowish sticky solid after column chromatography on silica gel by using 20% ethylacetate in hexane as eluent. **<sup>1</sup>H NMR** (500 MHz, CDCl<sub>3</sub>): δ (ppm) 9.87 (s, 1H), 7.77 (d, *J* = 8.0 Hz, 2H), 7.61 (d, *J* = 8.5 Hz, 2H), 6.66-6.62 (m, 1H), 6.49 (dd, *J* = 3.0, 1.5 Hz, 1H), 6.24 (t, *J* = 3.5 Hz, 1H), 3.38 (s, 6H). **<sup>13</sup>C NMR** (126 MHz, CDCl<sub>3</sub>): δ (ppm) 181.4, 163.3, 132.9, 132.1, 128.9, 127.7, 126.8, 116.6, 109.8, 103.9, 44.0. **FTIR**:  $\nu_{\max}$  (neat)/ cm<sup>-1</sup> = 3281, 2924, 1861, 1673, 1518, 1388, 1300, 1146, 1009, 842, 735. **HRMS (ESI)**: calculated for C<sub>14</sub>H<sub>14</sub>BrN<sub>3</sub>NaOS ([M+Na]<sup>+</sup>): 375.9913; found 375.9919.

#### 3-Chloro-*N*-(1-(dimethylcarbamothioyl)-1*H*-pyrrol-2-yl)benzamide (**6d**):

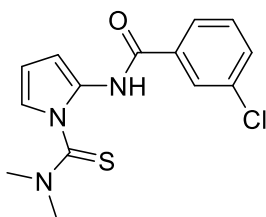

The titled compound **6d** was synthesized according to the **GP III** by using *N,N*-dimethyl-1*H*-pyrrole-1-carbothioamide (30.8 mg, 0.20 mmol, 1.0 equiv) and 3-(3-chlorophenyl)-1,4,2-dioxazol-5-one (59.3 mg, 0.30 mmol, 1.5 equiv). The product **6d** (56.2 mg, 0.18 mmol, 91%) was isolated as a yellowish sticky solid after column chromatography on silica gel by using 20% ethylacetate in hexane as eluent. **<sup>1</sup>H NMR** (500 MHz, CDCl<sub>3</sub>): δ (ppm) 9.86 (s, 1H), 7.94-7.91 (m, 1H), 7.74 (d, *J* = 8.0 Hz, 1H), 7.50 (dd, *J* = 8.3, 0.8 Hz, 1H), 7.41 (t, *J* = 8.0 Hz, 1H), 6.64-6.63 (m, 1H), 6.50 (dd, *J* = 3.3, 1.8 Hz, 1H), 6.25 (t, *J* = 3.5 Hz, 1H), 3.38 (s, 6H). **<sup>13</sup>C NMR** (126 MHz, CDCl<sub>3</sub>): δ (ppm) 181.5, 163.0, 135.9, 135.2, 132.1, 130.2, 128.0, 127.6, 125.1, 116.7, 109.8, 104.1, 44.0. **FTIR**:  $\nu_{\max}$  (neat)/ cm<sup>-1</sup> = 3275, 2930, 1671, 1515, 1388, 1299, 1148, 1081, 990, 794. **HRMS (ESI)**: calculated for C<sub>14</sub>H<sub>15</sub>ClN<sub>3</sub>OS ([M+H]<sup>+</sup>): 308.0619; found 308.0605.

### ***N*-1-(Dimethylcarbamothioyl)-1*H*-pyrrol-2-yl)-[1,1'-biphenyl]-2-carboxamide (6e):**

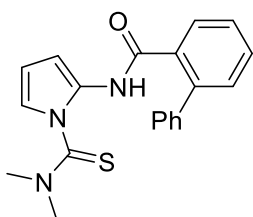

The titled compound **6e** was synthesized according to the **GP III** by using *N,N*-dimethyl-1*H*-pyrrole-1-carbothioamide (30.8 mg, 0.20 mmol, 1.0 equiv) and 3-([1,1'-biphenyl]-2-yl)-1,4,2-dioxazol-5-one (71.8 mg, 0.30 mmol, 1.5 equiv). The product **6e** (53.3 mg, 0.15 mmol, 76%) was isolated as a yellowish sticky solid after column chromatography on silica gel by using 20% ethylacetate in hexane as eluent. **<sup>1</sup>H NMR** (500 MHz, CDCl<sub>3</sub>): δ (ppm) 8.46 (s, 1H), 7.77 (d, *J* = 7.5 Hz, 1H), 7.51 (t, *J* = 7.5 Hz, 1H), 7.46-7.42 (m, 3H), 7.41-7.37 (m, 3H), 7.32 (t, *J* = 7.3 Hz, 1H), 6.50-6.44 (m, 1H), 6.36-6.29 (m, 1H), 6.17-6.11 (m, 1H), 3.17 (s, 6H). **<sup>13</sup>C NMR** (126 MHz, CDCl<sub>3</sub>): δ (ppm) 180.7, 166.7, 140.2, 139.7, 135.5, 130.7, 130.6, 129.4, 129.3, 128.5, 127.8, 127.5, 127.0, 116.2, 109.5, 103.3, 43.6. **FTIR**: ν<sub>max</sub> (neat)/ cm<sup>-1</sup> = 3301, 2925, 1669, 1516, 1389, 1302, 1147, 1081, 879, 741. **HRMS (ESI)**: calculated for C<sub>20</sub>H<sub>19</sub>N<sub>3</sub>NaOS ([M+Na]<sup>+</sup>): 372.1141; found 372.1147.

### ***N*-1-(Dimethylcarbamothioyl)-1*H*-pyrrol-2-yl)-2-naphthamide (6f):**

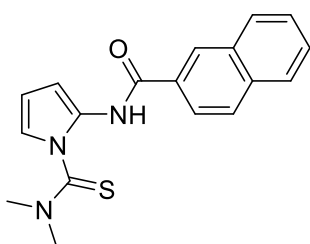

The titled compound **6f** was synthesized according to the **GP III** by using *N,N*-dimethyl-1*H*-pyrrole-1-carbothioamide (30.8 mg, 0.20 mmol, 1.0 equiv) and 3-(naphthalen-2-yl)-1,4,2-dioxazol-5-one (64.0 mg, 0.30 mmol, 1.5 equiv). The product **6f** (57 mg, 0.18 mmol, 88%) was isolated as a yellowish sticky solid after column chromatography on silica gel by using 20% ethylacetate in hexane as eluent. **<sup>1</sup>H NMR** (500 MHz, CDCl<sub>3</sub>): δ (ppm) 9.99 (s, 1H), 8.44 (s, 1H), 7.97-7.91 (m, 3H), 7.87 (d, *J* = 8.0 Hz, 1H), 7.58-7.53 (m, 2H), 6.72-6.65 (m, 1H), 6.54-6.45 (m, 1H), 6.29-6.24 (m, 1H), 3.37 (s, 6H). **<sup>13</sup>C NMR** (126 MHz, CDCl<sub>3</sub>): δ (ppm) 181.5, 164.4, 135.1, 132.8, 131.2, 129.3, 128.8, 128.2, 128.0, 127.9, 127.8, 126.9, 123.6, 116.5, 109.8, 103.8, 44.0. **FTIR**: ν<sub>max</sub> (neat)/ cm<sup>-1</sup> = 3281, 2931, 1665, 1517, 1389, 1299, 1146, 1081, 864, 760. **HRMS (ESI)**: calculated for C<sub>18</sub>H<sub>18</sub>N<sub>3</sub>OS ([M+H]<sup>+</sup>): 324.1165; found 324.1152.

### ***N*-1-(Dimethylcarbamothioyl)-1*H*-pyrrol-2-yl)thiophene-2-carboxamide (6g):**

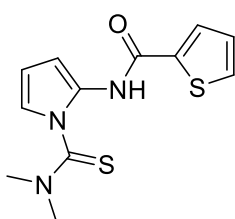

The titled compound **6g** was synthesized according to the **GP III** by using *N,N*-dimethyl-1*H*-pyrrole-1-carbothioamide (30.8 mg, 0.20 mmol, 1.0 equiv) and 3-(thiophen-2-yl)-1,4,2-dioxazol-5-one (50.7 mg, 0.30 mmol, 1.5 equiv). The product **6g** (51.5 mg, 0.18 mmol, 92%) was isolated as a white solid after column chromatography on silica gel by using 20% ethylacetate in hexane as eluent. **<sup>1</sup>H NMR** (500 MHz, CDCl<sub>3</sub>): δ (ppm) 9.73 (s, 1H), 7.60 (dd,

$J = 3.5, 1.0$  Hz, 1H), 7.52 (dd,  $J = 5.0, 1.0$  Hz, 1H), 7.10 (dd,  $J = 4.8, 3.8$  Hz, 1H), 6.57 (dd,  $J = 3.3, 1.3$  Hz, 1H), 6.48 (dd,  $J = 3.3, 1.8$  Hz, 1H), 6.22 (t,  $J = 3.5$  Hz, 1H), 3.36 (s, 6H).  $^{13}\text{C}$  NMR (126 MHz,  $\text{CDCl}_3$ ):  $\delta$  (ppm) 181.4, 158.9, 139.0, 131.0, 128.6, 127.9, 127.3, 116.5, 109.8, 104.0, 44.0. FTIR:  $\nu_{\text{max}}$  (neat)/  $\text{cm}^{-1} = 3228, 3102, 2924, 1655, 1495, 1415, 1276, 1144, 716$ . HRMS (ESI): calculated for  $\text{C}_{12}\text{H}_{14}\text{N}_3\text{OS}_2$  ( $[\text{M}+\text{H}]^+$ ): 280.0573; found 280.0561.

***N*-(1-(Dimethylcarbamothioyl)-1*H*-pyrrol-2-yl)cinnamamide (6h):**

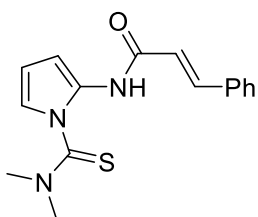

The titled compound **6h** was synthesized according to the **GP III** by using *N,N*-dimethyl-1*H*-pyrrole-1-carbothioamide (30.8 mg, 0.20 mmol, 1.0 equiv) and (*E*)-3-styryl-1,4,2-dioxazol-5-one (56.8 mg, 0.30 mmol, 1.5 equiv). The product **6h** (58 mg, 0.19 mmol, 97%) was isolated as a yellowish sticky solid after column chromatography on silica gel by using 22% ethylacetate in hexane as eluent.  $^1\text{H}$  NMR (500 MHz,  $\text{CDCl}_3$ ):  $\delta$  (ppm) 9.07 (s, 1H), 7.69 (d,  $J = 15.5$  Hz, 1H), 7.59-7.47 (m, 2H), 7.42-7.31 (m, 3H), 6.61-6.56 (m, 1H), 6.50 (d,  $J = 16.0$  Hz, 1H), 6.48-6.44 (m, 1H), 6.22 (t,  $J = 3.3$  Hz, 1H), 3.36 (s, 6H).  $^{13}\text{C}$  NMR (126 MHz,  $\text{CDCl}_3$ ):  $\delta$  (ppm) 181.4, 163.2, 142.3, 134.8, 130.1, 129.0, 128.1, 127.4, 120.7, 116.5, 109.7, 104.2, 43.8. FTIR:  $\nu_{\text{max}}$  (neat)/  $\text{cm}^{-1} = 3255, 2924, 2853, 1666, 1625, 1519, 1390, 1301, 1148, 976, 763$ . HRMS (ESI): calculated for  $\text{C}_{16}\text{H}_{17}\text{N}_3\text{NaOS}$  ( $[\text{M}+\text{Na}]^+$ ): 322.0985; found 322.0990.

***N*-(1-(Dimethylcarbamothioyl)-1*H*-pyrrol-2-yl)-3-phenylpropanamide (6i):**

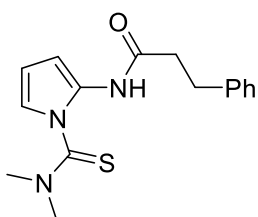

The titled compound **6i** was synthesized according to the **GP III** by using *N,N*-dimethyl-1*H*-pyrrole-1-carbothioamide (30.8 mg, 0.20 mmol, 1.0 equiv) and 3-phenethyl-1,4,2-dioxazol-5-one (57.4 mg, 0.30 mmol, 1.5 equiv). The product **6i** (50.7 mg, 0.17 mmol, 84%) was isolated as a yellowish sticky solid after column chromatography on silica gel by using 22% ethylacetate in hexane as eluent.  $^1\text{H}$  NMR (500 MHz,  $\text{CDCl}_3$ ):  $\delta$  (ppm) 8.48 (s, 1H), 7.30-7.27 (m, 2H), 7.23-7.18 (m, 3H), 6.46-6.41 (m, 1H), 6.40-6.34 (m, 1H), 6.20-6.13 (m, 1H), 3.29 (s, 6H), 3.02 (t,  $J = 7.8$  Hz, 2H), 2.64 (t,  $J = 7.8$  Hz, 2H).  $^{13}\text{C}$  NMR (126 MHz,  $\text{CDCl}_3$ ):  $\delta$  (ppm) 181.2, 170.2, 140.7, 128.6, 128.5, 126.6, 126.3, 116.6, 109.4, 104.5, 43.7, 38.7, 31.4. FTIR:  $\nu_{\text{max}}$  (neat)/  $\text{cm}^{-1} = 3275, 2931, 1671, 1518, 1390, 1301, 1146, 1080, 974, 860$ . HRMS (ESI): calculated for  $\text{C}_{16}\text{H}_{19}\text{N}_3\text{NaOS}$  ( $[\text{M}+\text{Na}]^+$ ): 324.1141; found 324.1147.

***N*-(1-(Dimethylcarbamothioyl)-4-phenyl-1*H*-pyrrol-2-yl)benzamide (6j):**

The titled compound **6j** was synthesized according to the **GP III** by using *N,N*-dimethyl-3-phenyl-1*H*-pyrrole-1-carbothioamide (46 mg, 0.20 mmol, 1.0 equiv) and 3-phenyl-1,4,2-

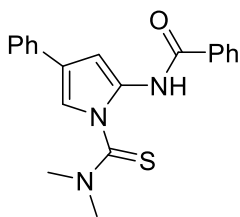

dioxazol-5-one (49 mg, 0.30 mmol, 1.5 equiv). The product **6j** (47 mg, 0.13 mmol, 67%) was isolated as a white solid after column chromatography on silica gel by using 12% ethylacetate in hexane as eluent. **<sup>1</sup>H NMR** (500 MHz, CDCl<sub>3</sub>): δ (ppm) 10.00 (s, 1H), 7.93 (d, *J* = 7.5 Hz, 2H), 7.56-7.53 (m, 3H), 7.49 (t, *J* = 7.5 Hz, 2H), 7.36 (t, *J* = 7.8 Hz, 2H), 7.26-7.23 (m, 1H), 7.05 (d, *J* = 1.5 Hz, 1H), 6.79 (d, *J* = 1.5 Hz, 1H), 3.42 (s, 6H). **<sup>13</sup>C NMR** (126 MHz, CDCl<sub>3</sub>): δ (ppm) 181.2, 164.2, 134.1, 134.0, 132.2, 129.0, 128.9, 127.4, 126.9, 125.7, 125.6, 112.2, 102.2, 44.0. **FTIR**:  $\nu_{\max}$  (neat)/ cm<sup>-1</sup> = 3194, 2924, 1664, 1530, 1454, 1389, 1321, 1275, 1145, 907. **HRMS (ESI)**: calculated for C<sub>20</sub>H<sub>19</sub>N<sub>3</sub>NaOS ([M+Na]<sup>+</sup>): 372.1141; found 372.1147.

#### ***N*-1-(Dimethylcarbamothioyl)-4-(furan-2-yl)-1*H*-pyrrol-2-yl)benzamide (6k):**

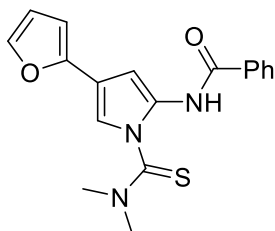

The titled compound **6k** was synthesized according to the **GP III** by using 3-(furan-2-yl)-*N,N*-dimethyl-1*H*-pyrrole-1-carbothioamide (44.1 mg, 0.20 mmol, 1.0 equiv) and 3-phenyl-1,4,2-dioxazol-5-one (49 mg, 0.30 mmol, 1.5 equiv). The product **6k** (28 mg, 0.08 mmol, 41%) was isolated as a yellowish sticky solid after column chromatography on silica gel by using 15% ethylacetate in hexane as eluent. **<sup>1</sup>H NMR** (400 MHz, CDCl<sub>3</sub>): δ (ppm) 10.09 (s, 1H), 7.92 (d, *J* = 7.6 Hz, 2H), 7.55 (d, *J* = 7.2 Hz, 1H), 7.49 (d, *J* = 7.4 Hz, 2H), 7.37-7.33 (m, 1H), 6.95-6.91 (m, 1H), 6.80-6.76 (m, 1H), 6.44-6.39 (m, 2H), 3.42 (s, 6H). **<sup>13</sup>C NMR** (101 MHz, CDCl<sub>3</sub>): δ (ppm) 180.9, 164.1, 149.6, 141.0, 133.8, 132.2, 130.3, 129.0, 127.4, 116.8, 111.6, 111.5, 104.9, 100.8, 44.1. **FTIR**:  $\nu_{\max}$  (neat)/ cm<sup>-1</sup> = 3287, 2925, 1665, 1523, 1393, 1320, 1268, 1153, 798, 709. **HRMS (ESI)**: calculated for C<sub>18</sub>H<sub>18</sub>N<sub>3</sub>O<sub>2</sub>S ([M+H]<sup>+</sup>): 340.1114; found 340.1118.

#### ***N*-1-(Dimethylcarbamothioyl)-4-(thiophen-2-yl)-1*H*-pyrrol-2-yl)benzamide (6l):**

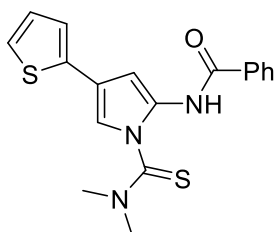

The titled compound **6l** was synthesized according to the **GP III** by using *N,N*-dimethyl-3-(thiophen-2-yl)-1*H*-pyrrole-1-carbothioamide (47.3 mg, 0.20 mmol, 1.0 equiv) and 3-phenyl-1,4,2-dioxazol-5-one (49 mg, 0.30 mmol, 1.5 equiv). The product **6l** (45 mg, 0.13 mmol, 63%) was isolated as a yellowish sticky solid after column chromatography on silica gel by using 15% ethylacetate in hexane as eluent. **<sup>1</sup>H NMR** (500 MHz, CDCl<sub>3</sub>): δ (ppm) 10.02 (s, 1H), 7.92 (d, *J* = 7.5 Hz, 2H), 7.55 (t, *J* = 7.3 Hz, 1H), 7.49 (t, *J* = 7.5 Hz, 2H), 7.15 (d, *J* = 5.0 Hz, 1H), 7.13 (d, *J* = 3.5 Hz, 1H), 7.01 (t, *J* = 4.3 Hz, 1H), 6.99-6.94 (m, 1H), 6.74-6.69 (m, 1H), 3.41 (s, 6H). **<sup>13</sup>C NMR** (126 MHz, CDCl<sub>3</sub>): δ (ppm)

180.9, 164.1, 137.3, 133.9, 132.2, 128.9, 127.8, 127.4, 123.2, 123.0, 119.9, 112.0, 102.4, 44.0. **FTIR:**  $\nu_{\max}$  (neat)/  $\text{cm}^{-1}$  = 3281, 2928, 1670, 1515, 1389, 1316, 1265, 1141, 840, 793. **HRMS (ESI):** calculated for  $\text{C}_{18}\text{H}_{17}\text{N}_3\text{NaOS}_2$  ( $[\text{M}+\text{Na}]^+$ ): 378.0705; found 378.0695.

***N*-(4-Benzyl-1-(dimethylcarbamothioyl)-1*H*-pyrrol-2-yl)benzamide (6m):**

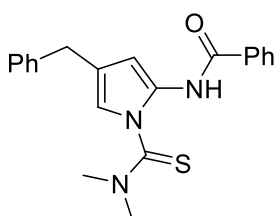

The titled compound **6m** was synthesized according to the **GP III** by using 3-benzyl-*N,N*-dimethyl-1*H*-pyrrole-1-carbothioamide (49 mg, 0.20 mmol, 1.0 equiv) and 3-phenyl-1,4,2-dioxazol-5-one (49 mg, 0.30 mmol, 1.5 equiv). The product **6m** (47.4 mg, 0.13 mmol, 65%) was isolated as a yellowish sticky solid after column chromatography on silica gel by using 12% ethylacetate in hexane as eluent. **<sup>1</sup>H NMR** (500 MHz,  $\text{CDCl}_3$ ):  $\delta$  (ppm) 10.01 (s, 1H), 7.85 (d,  $J = 8.0$  Hz, 2H), 7.47 (t,  $J = 7.5$  Hz, 1H), 7.41 (t,  $J = 7.5$  Hz, 2H), 7.26-7.20 (m, 4H), 7.16 (t,  $J = 7.0$  Hz, 1H), 6.58-6.51 (m, 1H), 6.14-6.07 (m, 1H), 3.75 (s, 2H), 3.28 (s, 6H). **<sup>13</sup>C NMR** (126 MHz,  $\text{CDCl}_3$ ):  $\delta$  (ppm) 181.5, 164.0, 140.6, 134.0, 132.0, 128.90, 128.85, 128.5, 128.3, 127.3, 126.2, 124.9, 114.1, 104.8, 43.9, 33.6. **FTIR:**  $\nu_{\max}$  (neat)/  $\text{cm}^{-1}$  = 3287, 2928, 1672, 1516, 1387, 1318, 1264, 1148, 986, 794, 732. **HRMS (ESI):** calculated for  $\text{C}_{21}\text{H}_{22}\text{N}_3\text{OS}$  ( $[\text{M}+\text{H}]^+$ ): 364.1478; found 364.1468.

***N*-(1-(Dimethylcarbamothioyl)-4-ethyl-1*H*-pyrrol-2-yl)benzamide (6n):**

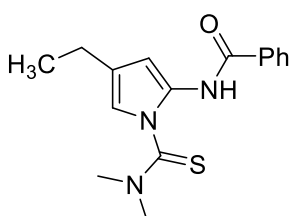

The titled compound **6n** was synthesized according to the **GP III** by using 3-ethyl-*N,N*-dimethyl-1*H*-pyrrole-1-carbothioamide (36.5 mg, 0.20 mmol, 1.0 equiv) and 3-phenyl-1,4,2-dioxazol-5-one (49 mg, 0.30 mmol, 1.5 equiv). The product **6n** (32 mg, 0.11 mmol, 53%) was isolated as a yellow liquid after column chromatography on silica gel by using 12% ethylacetate in hexane as eluent. **<sup>1</sup>H NMR** (500 MHz,  $\text{CDCl}_3$ ):  $\delta$  (ppm) 10.07 (s, 1H), 7.90 (d,  $J = 7.0$  Hz, 2H), 7.52 (t,  $J = 7.5$  Hz, 1H), 7.46 (d,  $J = 7.5$  Hz, 2H), 6.59 (d,  $J = 1.5$  Hz, 1H), 6.25 (d,  $J = 1.0$  Hz, 1H), 3.37 (s, 6H), 2.47 (d,  $J = 7.5$  Hz, 2H), 1.19 (t,  $J = 7.5$  Hz, 3H). **<sup>13</sup>C NMR** (101 MHz,  $\text{CDCl}_3$ ):  $\delta$  (ppm) 181.5, 163.9, 134.0, 132.0, 128.9, 128.1, 127.5, 127.3, 112.7, 104.4, 44.0, 20.2, 14.4. **FTIR:**  $\nu_{\max}$  (neat)/  $\text{cm}^{-1}$  = 3295, 2929, 1666, 1522, 1390, 1306, 1152, 1069, 801, 708. **HRMS (ESI):** calculated for  $\text{C}_{16}\text{H}_{20}\text{N}_3\text{OS}$  ( $[\text{M}+\text{H}]^+$ ): 302.1322; found 302.1314.

***N*-(1-(Dimethylcarbamothioyl)-4-(2,6-dimethylhept-5-en-1-yl)-1*H*-pyrrol-2-yl)benzamide (6o):**

The titled compound **6o** was synthesized according to the **GP III** by using 3-(2,6-dimethylhept-5-en-1-yl)-*N,N*-dimethyl-1*H*-pyrrole-1-carbothioamide (55.7 mg, 0.20 mmol, 1.0 equiv) and



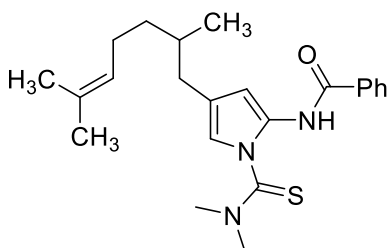

3-phenyl-1,4,2-dioxazol-5-one (49 mg, 0.30 mmol, 1.5 equiv). The product **6o** (55.8 mg, 0.14 mmol, 70%) was isolated as a yellow liquid after column chromatography on silica gel by using 13% ethylacetate in hexane as eluent. **<sup>1</sup>H NMR** (500 MHz, CDCl<sub>3</sub>): δ (ppm) 10.12 (s, 1H), 7.90 (d, *J* = 7.0 Hz, 2H), 7.52 (t, *J* = 7.3 Hz, 1H), 7.46 (t, *J* = 7.5 Hz, 2H), 6.57 (s, 1H), 6.23 (s, 1H), 5.10 (t, *J* = 7.0 Hz, 1H), 3.36 (s, 6H), 2.45 (dd, *J* = 14.3, 5.8 Hz, 1H), 2.21 (dd, *J* = 14.3, 8.0 Hz, 1H), 2.08-2.01 (m, 1H), 1.99-1.94 (m, 1H), 1.73-1.70 (m, 1H), 1.68 (s, 3H), 1.61 (s, 3H), 1.45-1.38 (m, 1H), 1.22-1.15 (m, 1H), 0.90 (d, *J* = 6.5 Hz, 3H). **<sup>13</sup>C NMR** (126 MHz, CDCl<sub>3</sub>): δ (ppm) 181.7, 163.9, 134.2, 131.9, 131.3, 128.9, 128.1, 127.3, 125.0, 124.3, 114.0, 105.1, 44.0, 37.0, 34.7, 33.5, 25.83, 25.79, 19.7, 17.8. **FTIR**:  $\nu_{\text{max}}$  (neat)/ cm<sup>-1</sup> = 3284, 2914, 1670, 1515, 1387, 1315, 1133, 987, 752, 704. **HRMS (ESI)**: calculated for C<sub>23</sub>H<sub>32</sub>N<sub>3</sub>OS ([M+H]<sup>+</sup>): 398.2261; found 398.2265.

#### ***N*-(1-(Dimethylcarbamothioyl)-5-methyl-1*H*-pyrrol-2-yl)benzamide (6p):**

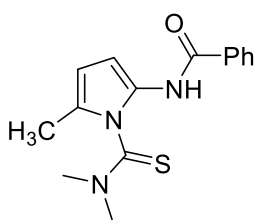

The titled compound **6p** was synthesized according to the **GP III** by using *N,N*,2-trimethyl-1*H*-pyrrole-1-carbothioamide (33.7 mg, 0.20 mmol, 1.0 equiv) and 3-phenyl-1,4,2-dioxazol-5-one (49 mg, 0.30 mmol, 1.5 equiv). The product **6p** (20.3 mg, 0.07 mmol, 35%) was isolated as a white solid after column chromatography on silica gel by using 15% ethylacetate in hexane as eluent. Here 2.0 mol % of Cp\*Co(CO)I<sub>2</sub> was used and reaction was conducted over 48 h. **<sup>1</sup>H NMR** (500 MHz, CDCl<sub>3</sub>): δ (ppm) 8.44 (s, 1H), 7.85 (d, *J* = 7.5 Hz, 2H), 7.54 (t, *J* = 7.3 Hz, 1H), 7.47 (t, *J* = 7.5 Hz, 2H), 6.32 (d, *J* = 3.0 Hz, 1H), 5.96 (d, *J* = 3.0 Hz, 1H), 3.50 (s, 3H), 3.05 (s, 3H), 2.16 (s, 3H). **<sup>13</sup>C NMR** (126 MHz, CDCl<sub>3</sub>): δ (ppm) 181.2, 165.7, 134.1, 132.1, 128.9, 127.4, 124.4, 124.3, 107.9, 104.3, 43.7, 42.3, 12.3. **FTIR**:  $\nu_{\text{max}}$  (neat)/ cm<sup>-1</sup> = 3233, 2924, 1669, 1585, 1528, 1471, 1377, 1307, 1152, 968, 724. **HRMS (ESI)**: calculated for C<sub>15</sub>H<sub>17</sub>N<sub>3</sub>NaOS ([M+Na]<sup>+</sup>): 310.0985; found 310.0990.

#### ***N*-(1-(Dimethylcarbamothioyl)-1*H*-indol-2-yl)benzamide (6q):**

The titled compound **6q** was synthesized according to the **GP III** by using *N,N*-dimethyl-1*H*-indole-1-carbothioamide (40.9 mg, 0.20 mmol, 1.0 equiv) and 3-phenyl-1,4,2-dioxazol-5-one (49 mg, 0.30 mmol, 1.5 equiv). The product **6q** (51.9 mg, 0.16 mmol, 80%) was isolated as a white solid after column chromatography on silica gel by using 22% ethylacetate in hexane as

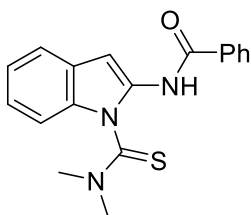

eluent. Here 1.0 mol % of Cp\*Co(CO)I<sub>2</sub> was used. **<sup>1</sup>H NMR** (400 MHz, CDCl<sub>3</sub>): δ (ppm) 10.17 (s, 1H), 7.98-7.96 (m, 2H), 7.59-7.55 (m, 2H), 7.52-7.49 (m, 2H), 7.24-7.17 (m, 2H), 7.16 (s, 1H), 6.97 (d, *J* = 8.8 Hz, 1H), 3.63 (s, 3H), 3.08 (s, 3H). **<sup>13</sup>C NMR** (101 MHz, CDCl<sub>3</sub>): δ (ppm) 180.0, 164.1, 133.7, 132.9, 132.4, 131.5, 129.0, 128.1, 127.4, 122.8, 122.5, 121.1, 110.7, 97.1, 43.7. **FTIR**: ν<sub>max</sub> (neat)/ cm<sup>-1</sup> = 3223, 2926, 1673, 1590, 1526, 1465, 1395, 1310, 1151, 1020, 856. **HRMS (ESI)**: calculated for C<sub>18</sub>H<sub>17</sub>N<sub>3</sub>NaOS ([M+Na]<sup>+</sup>): 346.0985; found 346.0992.

#### ***N*-(1-(Diethylcarbamothioyl)-1*H*-pyrrol-2-yl)benzamide (6r):**

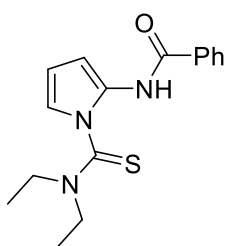

The titled compound **6r** was synthesized according to the **GP III** by using *N,N*-diethyl-1*H*-pyrrole-1-carbothioamide (36.5 mg, 0.20 mmol, 1.0 equiv) and 3-phenyl-1,4,2-dioxazol-5-one (49 mg, 0.30 mmol, 1.5 equiv). The product **6r** (34 mg, 0.11 mmol, 56%) was isolated as a white solid after column chromatography on silica gel by using 15% ethylacetate in hexane as eluent. **<sup>1</sup>H NMR** (400 MHz, CDCl<sub>3</sub>): δ (ppm) 9.47 (s, 1H), 7.89 (d, *J* = 7.2 Hz, 2H), 7.54 (t, *J* = 7.2 Hz, 1H), 7.47 (t, *J* = 7.2 Hz, 2H), 6.60-6.59 (m, 1H), 6.48 (dd, *J* = 3.2, 1.6 Hz, 1H), 6.24 (t, *J* = 3.4 Hz, 1H), 3.87-3.69 (m, 4H), 1.28 (t, *J* = 7.0 Hz, 6H). **<sup>13</sup>C NMR** (101 MHz, CDCl<sub>3</sub>): δ (ppm) 180.7, 164.5, 133.9, 132.1, 128.9, 127.3, 127.1, 116.0, 109.6, 103.9, 47.7, 13.3. **HRMS (ESI)**: calculated for C<sub>16</sub>H<sub>20</sub>N<sub>3</sub>OS ([M+H]<sup>+</sup>): 302.1322; found 302.1323.

#### ***N*-(1-(Diisopropylcarbamothioyl)-1*H*-pyrrol-2-yl)benzamide (6s):**

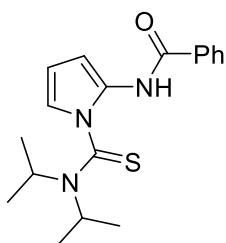

The titled compound **6s** was synthesized according to the **GP III** by using *N,N*-diisopropyl-1*H*-pyrrole-1-carbothioamide (42.1 mg, 0.20 mmol, 1.0 equiv) and 3-phenyl-1,4,2-dioxazol-5-one (49 mg, 0.30 mmol, 1.5 equiv). The product **6s** (20.5 mg, 0.06 mmol, 31%, as an inseparable mixture of rotamer in 3.3:1 ratio) was isolated as a yellow sticky solid after column chromatography on silica gel by using 10% ethylacetate in hexane as eluent. **<sup>1</sup>H NMR** (400 MHz, CDCl<sub>3</sub>): δ (ppm) 9.15 (s, 1H), 7.88 (d, *J* = 7.2 Hz, 2H), 7.54-7.53 (m, 1H), 7.48 (t, *J* = 7.2 Hz, 2H), 6.56-6.54 (m, 1H), 6.46 (dd, *J* = 3.0, 1.8 Hz, 1H), 6.22 (t, *J* = 3.4 Hz, 1H), 4.25-4.11 (m, 2H), 1.52-1.43 (m, 6H), 1.37 (d, *J* = 6.8 Hz, 6H) (**Major Isomer**). **<sup>13</sup>C NMR** (101 MHz, CDCl<sub>3</sub>): δ (ppm) 179.8, 164.4, 133.9, 132.0, 128.8, 127.2, 126.5, 116.2, 109.0, 103.8, 53.8, 21.0, 20.7 (**Major Isomer**). **HRMS (ESI)**: calculated for C<sub>18</sub>H<sub>24</sub>N<sub>3</sub>OS ([M+H]<sup>+</sup>): 330.1635; found 330.1635.

### Gram-Scale Synthesis:

The pyrrolyl thiocarbamate **1a** (463 mg, 3.0 mmol, 1.0 equiv) was taken in a 30.0 mL screw capped sealed tube. Then catalyst Cp\*Co(CO)I<sub>2</sub> (21.4 mg, 0.045 mmol, 1.5 mol %), NaOAc (14.8 mg, 0.18 mmol, 6.0 mol %), and AgSbF<sub>6</sub> (30.9 mg, 0.09 mmol, 3.0 mol %) were added successively to the reaction mixture. After that, phenyl isocyanate **2a** (631 mg, 3.6 mmol, 1.2 equiv), 5.0 mL of 1,1,2,2-tetrachloroethane were added to the reaction mixture and allowed to stir in a preheated oil bath at 100 °C for 26 h (to get **4a**) or 36 h (to get **3a**). On complete consumption of all the starting material as indicated by TLC, solvent was evaporated under *vacuo*. Ethylacetate was subsequently added to the black crude residue and filtered over a pad of celite. The filtrate was collected and solvent was evaporated under reduced pressure. The cyclic amide **3a** (2.49 mmol, 0.57 g, 83%) was isolated as a yellow solid, and for a second reaction, acyclic amide **4a** (2.43 mmol, 0.67 g, 81%) was isolated as a white solid after column chromatography on silica gel by using ethylacetate in hexane as eluent.

### Removal of Directing Group:

#### *N*-Phenyl-1*H*-pyrrole-2-carboxamide (**7**):<sup>2</sup>

In an oven-dried 100 mL round bottom flask, **4a** (41.0 mg, 0.15 mmol, 1.0 equiv) and 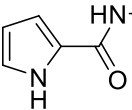 NiCl<sub>2</sub>·6H<sub>2</sub>O (285 mg, 1.20 mmol, 8.0 equiv) were taken, and dissolved in 40 mL of MeOH-THF (1:1 v/v). The resulting solution was cooled down to 0 °C and NaBH<sub>4</sub> (85 mg, 2.25 mmol, 15.0 equiv) was added slowly in portions.

The reaction mixture was stirred at the same temperature for 2 h. On complete consumption of all the starting material as indicated by TLC, solvent was evaporated under *vacuo*. Ethylacetate was subsequently added to the black crude residue and filtered over a pad of celite. The filtrate was collected and solvent was evaporated under reduced pressure. The product **7** (20.2 mg, 0.11 mmol, 72%) was isolated as a white solid after column chromatography on silica gel by using 10% ethylacetate in hexane as eluent. <sup>1</sup>H NMR (500 MHz, CDCl<sub>3</sub>): δ (ppm) 9.96 (br s, 1H), 7.68 (s, 1H), 7.61 (d, *J* = 7.5 Hz, 2H), 7.36 (t, *J* = 7.8 Hz, 2H), 7.13 (t, *J* = 7.5 Hz, 1H), 7.01-6.95 (m, 1H), 6.77-6.71 (m, 1H), 6.30-6.28 (m, 1H). <sup>13</sup>C NMR (101 MHz, CDCl<sub>3</sub>): δ (ppm) 159.3, 137.9, 129.2, 126.1, 124.4, 122.7, 120.2, 110.2, 109.8. FTIR: ν<sub>max</sub> (neat)/ cm<sup>-1</sup> = 3318, 1633, 1524, 1442, 1332, 1238, 1122, 1045, 732. HRMS (ESI): calculated for C<sub>11</sub>H<sub>11</sub>N<sub>2</sub>O ([M+H]<sup>+</sup>): 187.0866; found 187.0862.

### ***N*-(1*H*-Pyrrol-2-yl)benzamide (8):<sup>1</sup>**

**Method a:** In an oven-dried 25 mL round bottom flask, **6a** (54.7 mg, 0.20 mmol, 1.0 equiv) was taken and dissolved in 5 mL of anhydrous THF. The resulting solution was cooled down to 0 °C and lithium aluminium hydride (22.8 mg, 0.60 mmol, 3.0 equiv) was added in portions. Then the reaction mixture was stirred at the same temperature for 45 minutes. On complete consumption of all the starting material as indicated by TLC, the reaction mixture was quenched by adding saturated aq. NH<sub>4</sub>Cl solution. The aqueous layer was extracted with ethylacetate (2 x 10 mL), the combined organic layers were dried over Na<sub>2</sub>SO<sub>4</sub> and evaporated under reduced pressure. The product **8** (34.4 mg, 0.18 mmol, 92%) was isolated as a white solid after column chromatography on silica gel by using 10% ethylacetate in hexane as eluent.

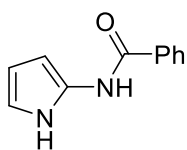

**Method b:** To a stirred solution of **6a** (109 mg, 0.4 mmol, 1.0 equiv) in MeOH (5.0 mL) was added NaOH (112 mg, 2.8 mmol, 7.0 equiv). The resulting mixture was refluxed until complete consumption of the starting material (monitored by TLC). The mixture was cooled to room temperature and then quenched by dropwise addition of 6 N HCl. After evaporation of MeOH under *vacuo*, the aqueous layer was extracted with ethylacetate (2 x 10 mL), dried over Na<sub>2</sub>SO<sub>4</sub>, and evaporated under reduced pressure. The product **8** (65 mg, 0.35 mmol, 87%) was isolated as a white solid after column chromatography on silica gel by using 10% ethylacetate in hexane as eluent. <sup>1</sup>H NMR (500 MHz, DMSO-*d*<sub>6</sub>): δ (ppm) 10.72 (br s, 1H), 10.54 (s, 1H), 7.96 (d, *J* = 7.5 Hz, 2H), 7.58 (t, *J* = 7.0 Hz, 1H), 7.52 (t, *J* = 7.5 Hz, 2H), 6.49 (d, *J* = 2.0 Hz, 1H), 5.95 (d, *J* = 3.0 Hz, 1H), 5.91-5.84 (m, 1H). <sup>13</sup>C NMR (126 MHz, DMSO-*d*<sub>6</sub>): δ (ppm) 163.8, 134.1, 131.4, 128.4, 127.9, 127.3, 112.7, 106.3, 96.2. FTIR: ν<sub>max</sub> (neat)/ cm<sup>-1</sup> = 3416, 3298, 1593, 1523, 1431, 1298, 1079, 1024, 899, 787. HRMS (ESI): calculated for C<sub>11</sub>H<sub>11</sub>N<sub>2</sub>O ([M+H]<sup>+</sup>): 187.0866; found 187.0870.

### **2-Benzamido-*N,N*-dimethyl-1*H*-pyrrole-1-carboxamide (9):<sup>2</sup>**

In an oven-dried 25 mL round bottom flask, **6a** (82.0 mg, 0.30 mmol, 1.0 equiv) and Ag<sub>2</sub>CO<sub>3</sub> (166 mg, 0.60 mmol, 2.0 equiv) were taken, and 5 mL of anhydrous dichloromethane was added. The reaction mixture was stirred at rt for 10 h. On complete consumption of all the starting material as indicated by TLC, dichloromethane was subsequently added to the black crude residue and filtered over a pad of celite. The filtrate was collected and solvent was evaporated under *vacuo*. The product **9** (73.5 mg, 0.29 mmol, 95%) was isolated as a white solid after column chromatography on silica gel by using 25% ethylacetate in hexane as eluent.

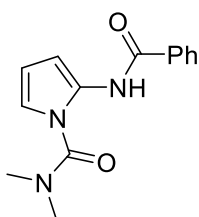

**<sup>1</sup>H NMR** (400 MHz, CDCl<sub>3</sub>): δ (ppm) 10.13 (s, 1H), 7.89 (d, *J* = 7.6 Hz, 2H), 7.51 (t, *J* = 7.2 Hz, 1H), 7.46 (t, *J* = 7.4 Hz, 2H), 6.74-6.66 (m, 1H), 6.63-6.56 (m, 1H), 6.24-6.16 (m, 1H), 3.10 (s, 6H). **<sup>13</sup>C NMR** (101 MHz, CDCl<sub>3</sub>): δ (ppm) 163.5, 155.7, 133.9, 131.9, 129.8, 128.8, 127.1, 115.1, 110.1, 100.9, 39.0. **FTIR**: ν<sub>max</sub> (neat)/ cm<sup>-1</sup> = 3336, 1669, 1523, 1488, 1384, 1266, 1104, 1052, 876, 800, 715. **HRMS (ESI)**: calculated for C<sub>14</sub>H<sub>15</sub>N<sub>3</sub>NaO<sub>2</sub> ([M+Na]<sup>+</sup>): 280.1056; found 280.1046.

### 2-Phenyl-1*H*-pyrrolo[1,2-*c*]imidazole-1,3(2*H*)-dithione (10):<sup>2</sup>

In an oven-dried 10 mL Schlenk tube, **3a** (45.7 mg, 0.20 mmol, 1.0 equiv) and Lawesson reagent (323.6 mg, 0.80 mmol, 4.0 equiv) were taken, and dissolved in 3 mL of anhydrous toluene. The resulting mixture was allowed to stir in a preheated oil bath at 120 °C until complete consumption of the starting material (monitored by TLC). The mixture was cooled down to room temperature and solvent was evaporated under *vacuo*. The product **10** (40.2 mg, 0.16 mmol, 82%) was isolated as a reddish solid after column chromatography on silica gel by using 2% ethylacetate in hexane as eluent. **<sup>1</sup>H NMR** (500 MHz, CDCl<sub>3</sub>): δ (ppm) 7.57-7.51 (m, 3H), 7.37 (dd, *J* = 3.0, 1.0 Hz, 1H), 7.34-7.32 (m, 2H), 6.99 (dd, *J* = 3.5, 0.5 Hz, 1H), 6.45 (t, *J* = 3.3 Hz, 1H). **<sup>13</sup>C NMR** (126 MHz, CDCl<sub>3</sub>): δ (ppm) 182.9, 174.0, 134.9, 134.8, 129.9, 129.5, 129.3, 118.4, 114.1. **FTIR**: ν<sub>max</sub> (neat)/ cm<sup>-1</sup> = 1553, 1496, 1417, 1332, 1285, 1230, 1119, 1041, 918. **HRMS (ESI)**: calculated for C<sub>12</sub>H<sub>9</sub>N<sub>2</sub>S<sub>2</sub> ([M+H]<sup>+</sup>): 245.0202; found 245.0205.

### 2-Phenyl-1*H*-pyrrolo[1,2-*c*]imidazole-1,3(2*H*)-dione (11):

In an oven-dried 10 mL screw capped sealed tube, **4a** (54.7 mg, 0.20 mmol, 1.0 equiv) and Cp\*Co(CO)I<sub>2</sub> (1.4 mg, 0.003 mmol, 1.5 mol %) were taken, and dissolved in 1.5 mL of TCE. The resulting mixture was allowed to stir in a preheated oil bath at 100 °C for 48 h. On complete consumption of all the starting material as indicated by TLC, the mixture was cooled down to room temperature and solvent was evaporated under *vacuo*. The product **11** (10.7 mg, 0.05 mmol, 25%) was isolated as a white solid after column chromatography on silica gel by using 4% ethylacetate in hexane as eluent. In second fraction, **3a** was also isolated in 61% yield. **<sup>1</sup>H NMR** (400 MHz, CDCl<sub>3</sub>): δ (ppm) 7.51 (t, *J* = 7.6 Hz, 2H), 7.44-7.40 (m, 3H), 7.37 (d, *J* = 1.6 Hz, 1H), 6.91 (d, *J* = 2.8 Hz, 1H), 6.55-6.51 (m, 1H). **<sup>13</sup>C NMR** (101 MHz, CDCl<sub>3</sub>): δ (ppm) 157.5, 147.9, 131.1, 129.4, 128.6, 126.5, 125.0, 119.5, 118.1, 114.5. **FTIR**: ν<sub>max</sub> (neat)/ cm<sup>-1</sup> = 2922, 1800, 1715, 1562, 1491, 1416, 1372, 1276, 1141, 1093, 815, 737. **HRMS (ESI)**: calculated for C<sub>12</sub>H<sub>9</sub>N<sub>2</sub>O<sub>2</sub> ([M+H]<sup>+</sup>): 213.0659; found 213.0653.

## Mechanistic Studies:

### Competition experiment:

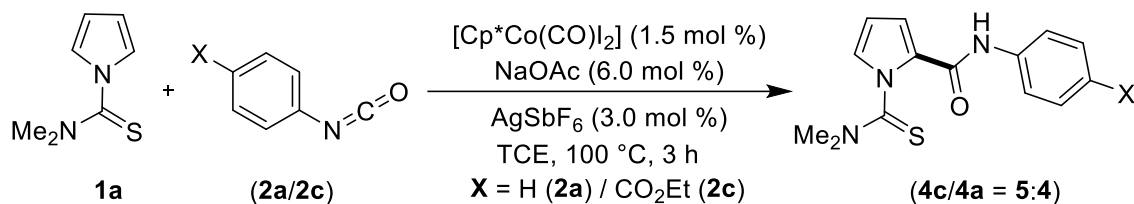

The pyrrolyl thiocarbamate **1a** (0.20 mmol, 1.0 equiv) was taken in a 15.0 mL screw capped sealed tube. Then catalyst Cp\*Co(CO)I<sub>2</sub> (1.4 mg, 0.003 mmol, 1.5 mol %), NaOAc (1.0 mg, 0.012 mmol, 6.0 mol %), and AgSbF<sub>6</sub> (2.1 mg, 0.006 mmol, 3.0 mol %) were added successively to the reaction mixture. After that, **2a** (0.24 mmol, 1.2 equiv), **2c** (0.24 mmol, 1.2 equiv) and 1.5 mL of 1,1,2,2-tetrachloroethane were added to the reaction mixture, and allowed to stir in a preheated oil bath at 100 °C for 12 h. Then the crude residue was diluted with ethylacetate, and carefully transferred to a round bottom flask. After evaporating the solvent under *vacuo*, the crude product flash through a silica gel column by using hexane-ethylacetate as eluent. The ratio of **4c:4a** = 5:4 is being calculated by <sup>1</sup>H NMR analysis (Figure S1).

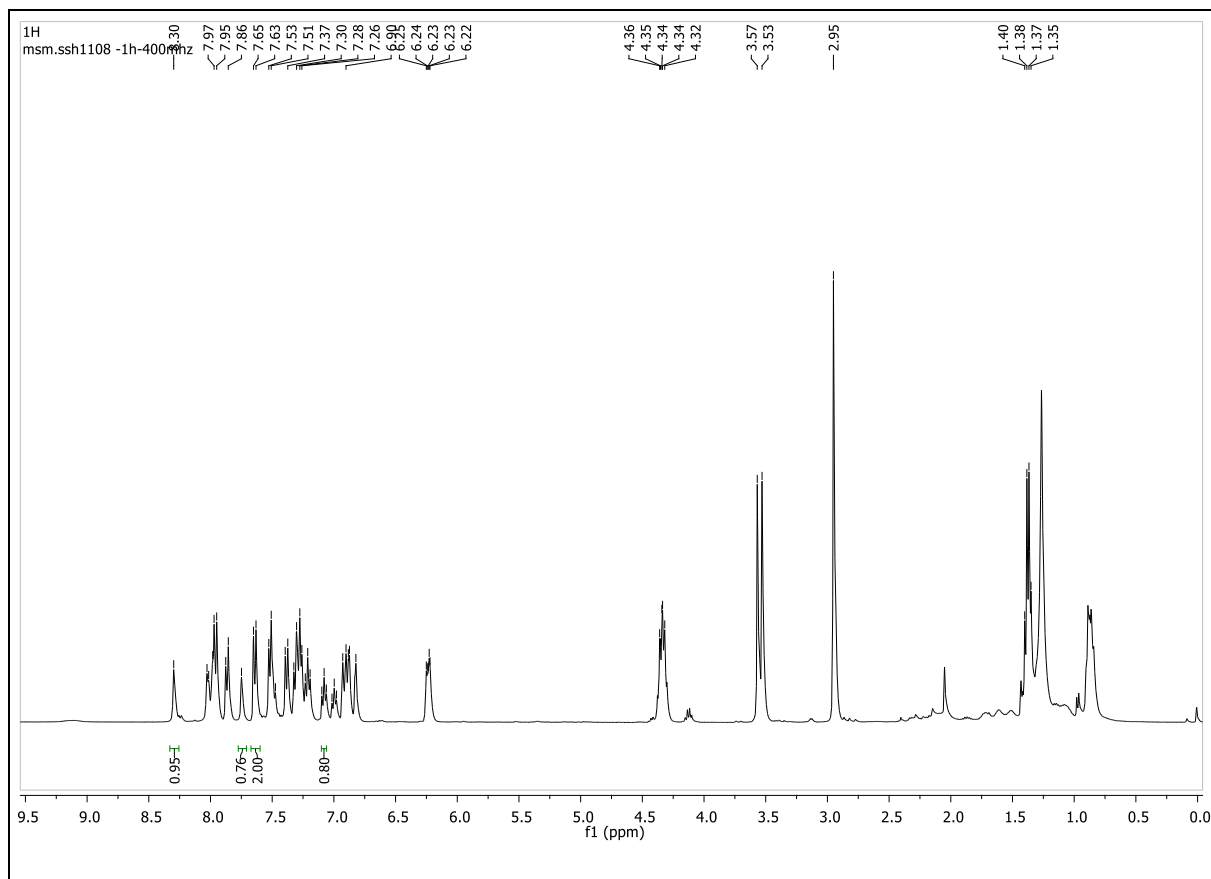

**Figure S1:** <sup>1</sup>H NMR spectra of competition experiment between isocyanates **2a** and **2c**.

## Deuterium labelling experiments using deuterated solvent as a co-solvent:

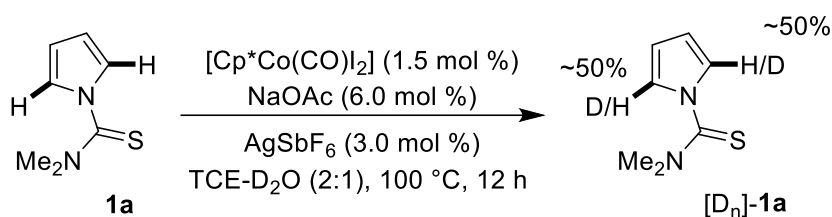

The pyrrolyl thiocarbamate **1a** (0.20 mmol, 1.0 equiv) was taken in a 15.0 mL screw capped sealed tube. Then catalyst Cp\*Co(CO)I<sub>2</sub> (1.4 mg, 0.003 mmol, 1.5 mol %), NaOAc (1.0 mg, 0.012 mmol, 6.0 mol %), and AgSbF<sub>6</sub> (2.1 mg, 0.006 mmol, 3.0 mol %) were added successively to the reaction mixture. After that, TCE and deuterated solvent were added (total volume 1.5 mL) while maintaining the required ratio and allowed to stir in a preheated oil bath at 100 °C for 12 h. Purification by silica gel column chromatography using hexane-ethylacetate as eluent provided mixture of **1a** and [D<sub>n</sub>]-**1a**. The D-incorporation in [D<sub>n</sub>]-**1a** was estimated by <sup>1</sup>H-NMR spectroscopy (Figure S2).

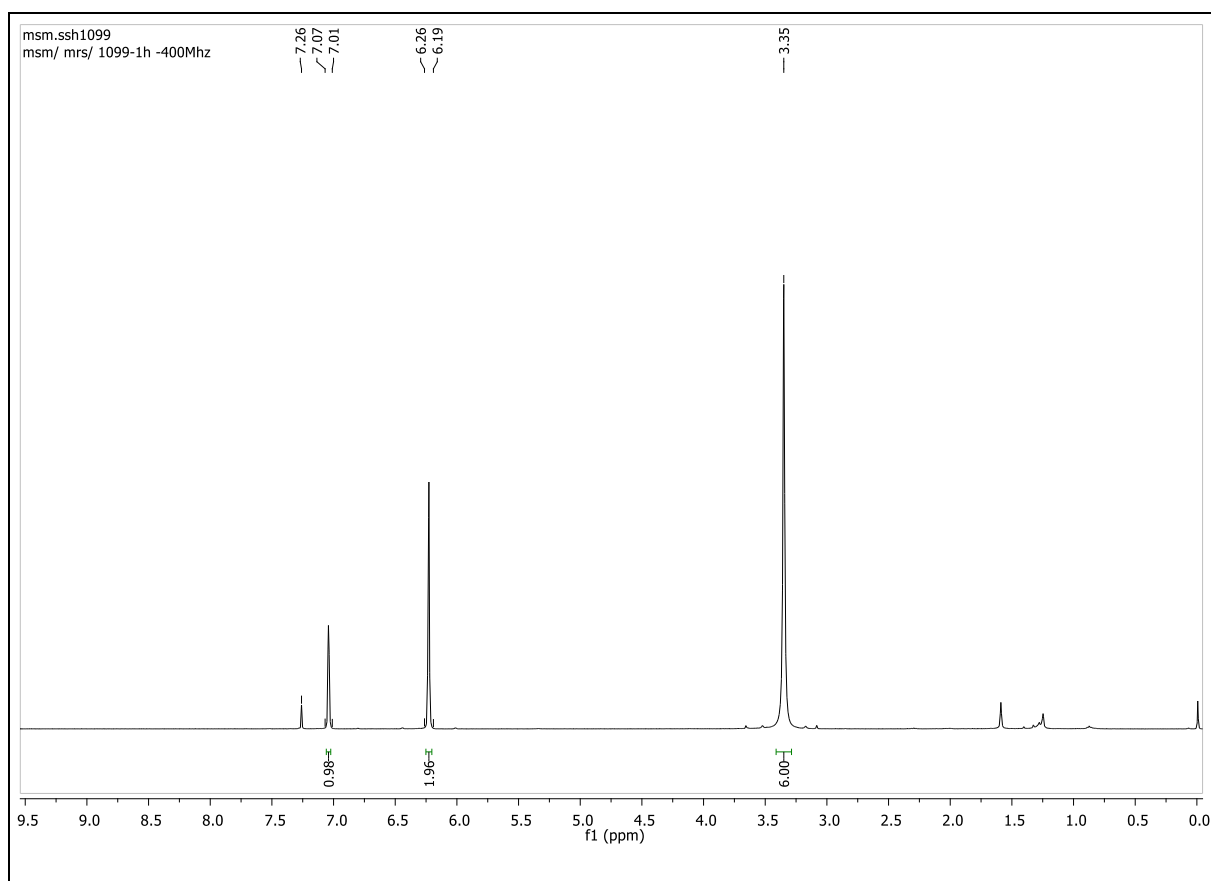

**Figure S2:** <sup>1</sup>H NMR spectra of deuterium labelling experiment.

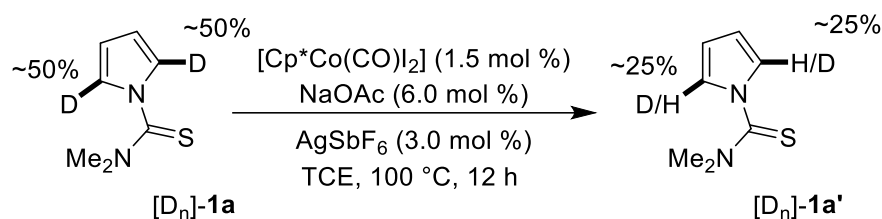

The pyrrolyl thiocarbamate  $[D_n]-1a$  (0.20 mmol, 1.0 equiv) was taken in a 15.0 mL screw capped sealed tube. Then catalyst  $\text{Cp}^*\text{Co}(\text{CO})\text{I}_2$  (1.4 mg, 0.003 mmol, 1.5 mol %), NaOAc (1.0 mg, 0.012 mmol, 6.0 mol %), and  $\text{AgSbF}_6$  (2.1 mg, 0.006 mmol, 3.0 mol %) were added successively to the reaction mixture. After that, 1.5 mL of TCE was added to the reaction mixture and allowed to stir in a preheated oil bath at 100 °C for 12 h. Purification by silica gel column chromatography using hexane-ethylacetate as eluent provided mixture of **1a** and  $[D_n]-1a'$ . The D-incorporation in  $[D_n]-1a'$  was estimated by  $^1\text{H-NMR}$  spectroscopy (Figure S3).

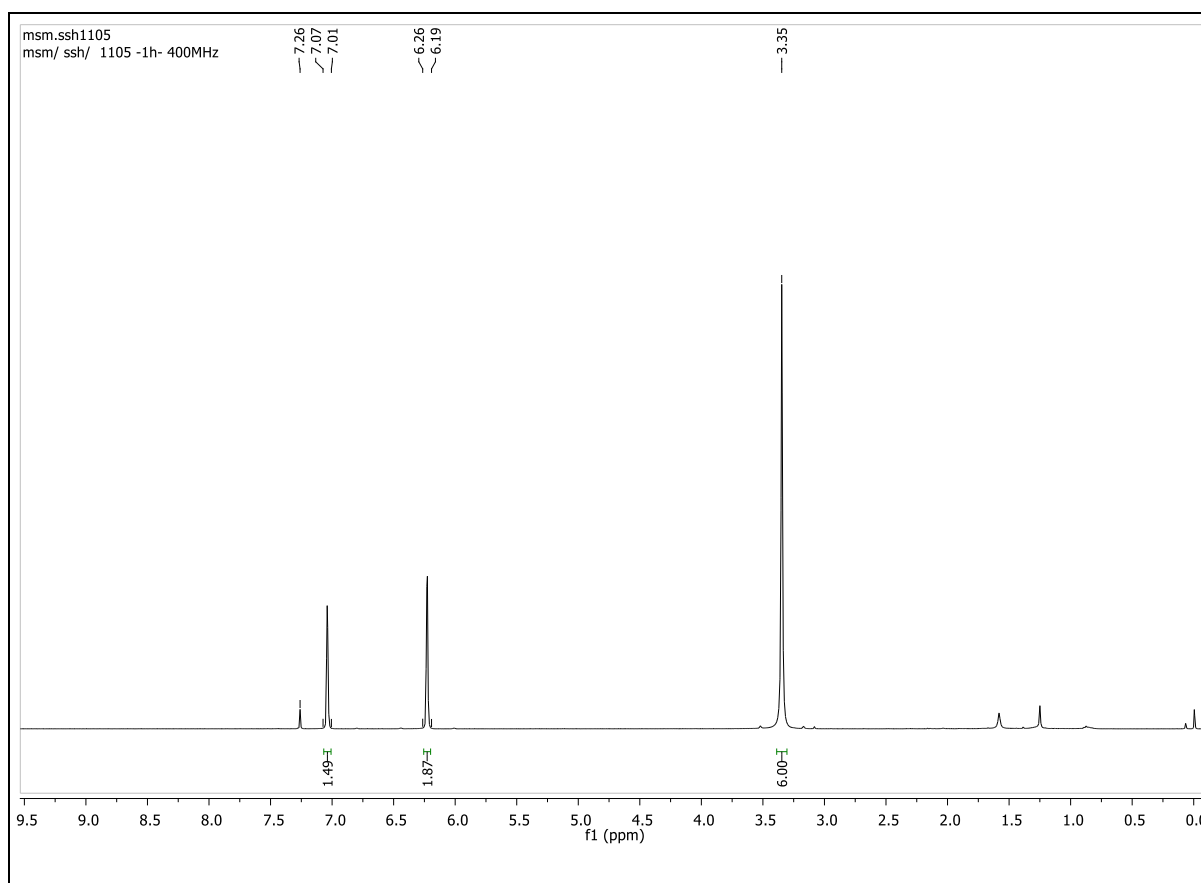

**Figure S3:**  $^1\text{H}$  NMR spectra of deuterium labelling experiment.



### Determination of $k_H/k_D$ from intermolecular competition experiment:

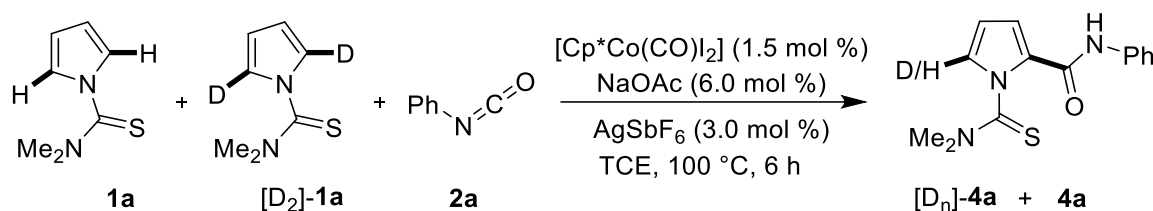

The pyrrolyl thiocarbamate **1a** (0.20 mmol, 1.0 equiv) and deuterio-pyrrolyl thiocarbamate **[D<sub>2</sub>]-1a** (0.20 mmol, 1.0 equiv) were taken in a 15.0 mL screw capped sealed tube. Then catalyst  $\text{Cp}^*\text{Co}(\text{CO})\text{I}_2$  (1.4 mg, 0.003 mmol, 1.5 mol %), NaOAc (1.0 mg, 0.012 mmol, 6.0 mol %), and  $\text{AgSbF}_6$  (2.1 mg, 0.006 mmol, 3.0 mol %) were added successively to the reaction mixture. After that, phenyl isocyanate **2a** (0.24 mmol, 1.2 equiv) and 1.5 mL of TCE were added to the reaction mixture and allowed to stir in a preheated oil bath at 100 °C for 6 h. Purification by silica gel column chromatography using hexane-ethylacetate as eluent, provided the mixture of **4a** and **[D<sub>n</sub>]-4a**. The ratio of **4a**:**[D<sub>n</sub>]-4a** was determined by <sup>1</sup>H NMR analysis to obtain a  $k_H/k_D$  value of approximately 1.5 (Figure S4).

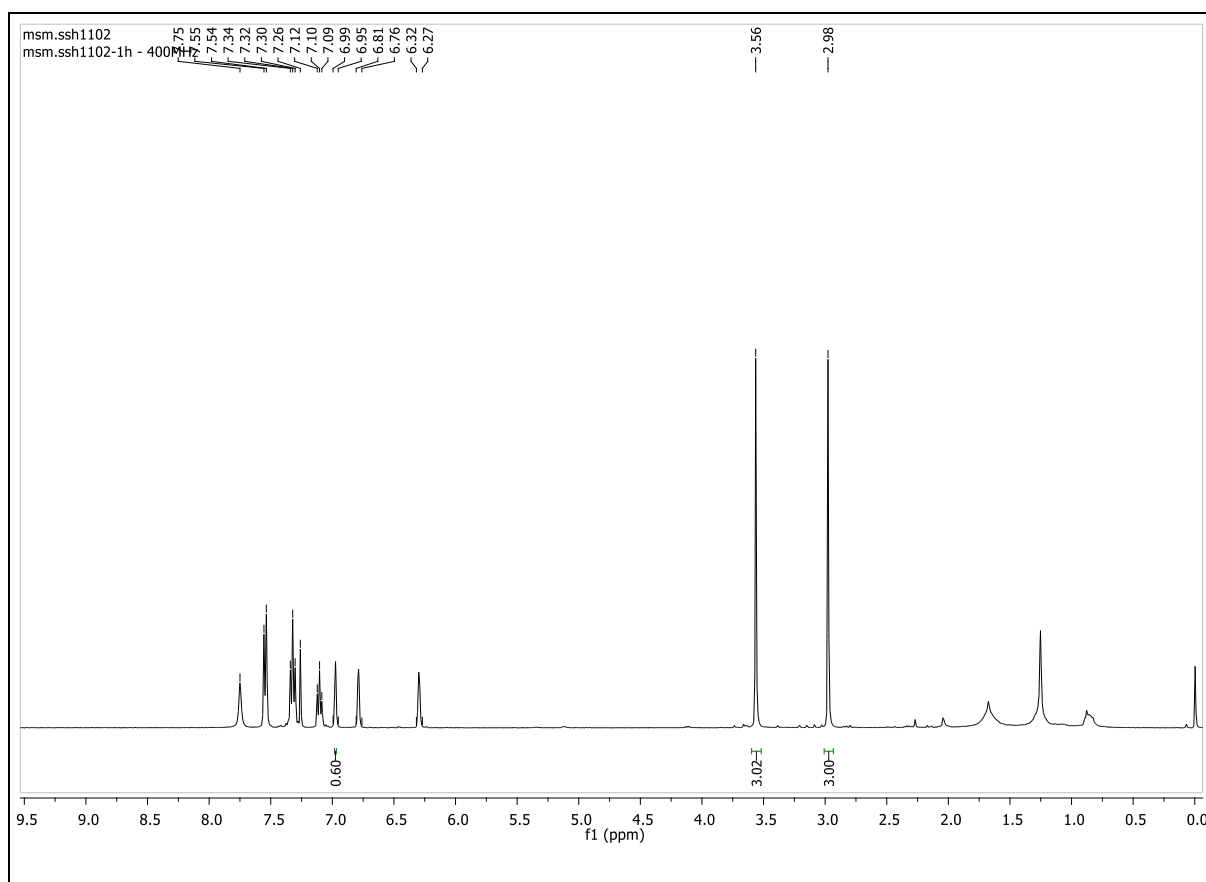

**Figure S4:** <sup>1</sup>H NMR spectra for determination of  $k_H/k_D$  value by intermolecular competition experiment.

### Determination of $k_H/k_D$ from parallel experiments:

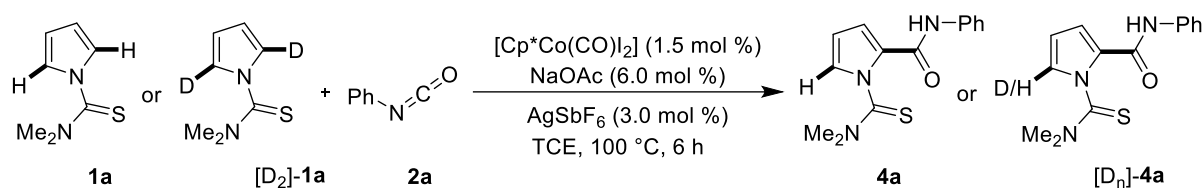

The pyrrolyl thiocarbamate **1a** (0.20 mmol, 1.0 equiv) and deuterio-pyrrolyl thiocarbamate **[D<sub>2</sub>]-1a** (0.20 mmol, 1.0 equiv) were taken separately in a 15.0 mL screw capped sealed tube. Then catalyst  $\text{Cp}^*\text{Co}(\text{CO})\text{I}_2$  (1.4 mg, 0.003 mmol, 1.5 mol %), NaOAc (1.0 mg, 0.012 mmol, 6.0 mol %), and  $\text{AgSbF}_6$  (2.1 mg, 0.006 mmol, 3.0 mol %) were added successively to both the reaction mixture. After that, phenyl isocyanate **2a** (0.24 mmol, 1.2 equiv) and 1.5 mL of TCE were added to each reaction mixture and allowed to stir in a preheated oil bath at 100 °C for 6 h. Finally, both the reaction mixtures were mixed together and purified by silica gel column chromatography using hexane-ethylacetate as eluent. The ratio of **4a**:**[D<sub>n</sub>]-4a** was determined by <sup>1</sup>H NMR analysis to obtain a  $k_H/k_D$  value of approximately 1.6 (Figure S5).

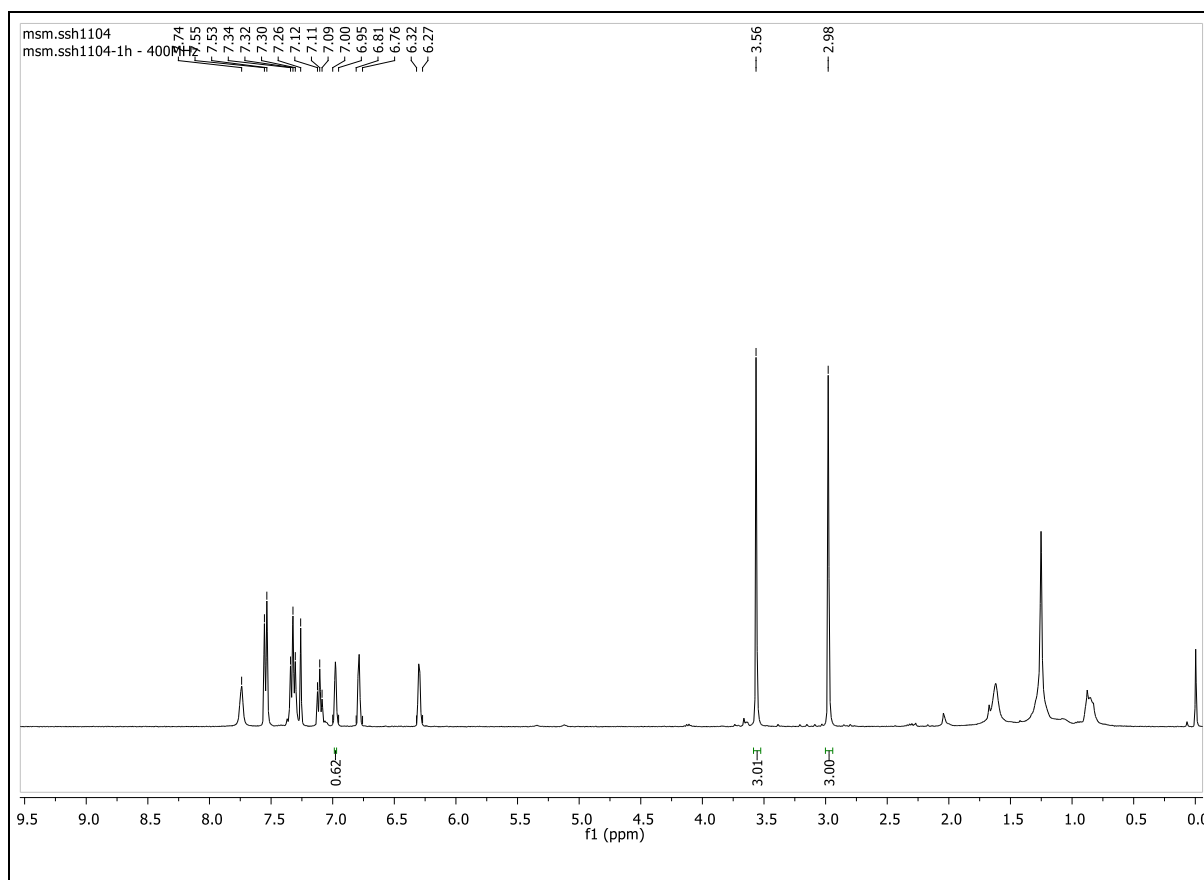

**Figure S5:** <sup>1</sup>H NMR spectra for determination of  $k_H/k_D$  value from parallel experiments.

### Control experiments for the cyclization step:

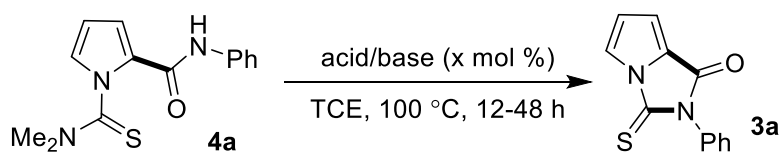

In an oven-dried 10 mL screw capped sealed tube, **4a** (54.7 mg, 0.20 mmol, 1.0 equiv) and acid/base (x mol %) were taken, and dissolved in 1.5 mL of TCE. The resulting mixture was allowed to stir in a preheated oil bath at 100 °C for 12-48 h. Next, progress of the reaction was monitored by TLC, the mixture was cooled down to room temperature and solvent was evaporated under *vacuo*. The product **3a** was isolated as a yellow solid after column chromatography on silica gel by using 2% ethylacetate in hexane as eluent.

| entry | acid/base (mol %)             | time (h) | yield <b>3a</b> (%) |
|-------|-------------------------------|----------|---------------------|
| 1     | na                            | 12       | 0                   |
| 2     | NaOAc(6.0)                    | 12       | 95                  |
| 3     | Et <sub>3</sub> N (6.0)       | 12       | 46                  |
| 4     | AgSbF <sub>6</sub> (3.0)      | 12       | 81                  |
| 5     | Sc(OTf) <sub>3</sub> (3.0)    | 12       | 15                  |
| 6     | Cp*Co(CO)I <sub>2</sub> (1.5) | 48       | 61                  |

### Detection of complex **C** in HRMS:

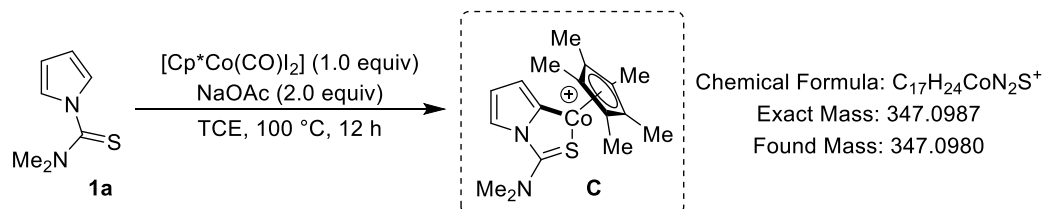

The pyrrolyl thiocarbamate **1a** (0.20 mmol, 1.0 equiv) was taken in a 15.0 mL screw capped sealed tube. Then catalyst Cp\*Co(CO)I<sub>2</sub> (95.2 mg, 0.20 mmol, 1.0 equiv) and NaOAc (164.1 mg, 0.04 mmol, 2.0 equiv) were added successively to the reaction mixture. After that, 1.5 mL of TCE was added to the reaction mixture and allowed to stir in a preheated oil bath at 100 °C for 12 h. Then, the reaction was cooled to room temperature, and the crude mixture was analyzed by HRMS, which was in complete agreement with the molecular formula related to species **C**.

# Target Screening Report

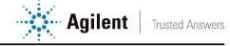

## Sample Information

|                       |              |                           |                                                                        |
|-----------------------|--------------|---------------------------|------------------------------------------------------------------------|
| <b>Name</b>           | MSM_SSH_1116 | <b>Data File Path</b>     | D:\MassHunter\Data\AUG2022\04-08-2022\MSM_SSH_1116_POS_01.d            |
| <b>Sample ID</b>      |              | <b>Acq. Time (Local)</b>  | 8/4/2022 12:10:14 PM (UTC+05:30)                                       |
| <b>Instrument</b>     | IITKGP       | <b>Method Path (Acq)</b>  | D:\MassHunter\Methods\TRAINING\MS SCAN POS_ORGANOMETALLICS_03.m        |
| <b>MS Type</b>        | QTOF         | <b>Version (Acq SW)</b>   | 6200 series TOF/6500 series Q-TOF B.09.00 (B9044.1 SP1)                |
| <b>Inj. Vol. (ul)</b> | 2            | <b>IRM Status</b>         | Success                                                                |
| <b>Position</b>       | P1-D9        | <b>Method Path (DA)</b>   | D:\MassHunter\Methods\TARGETED ANALYSIS ORGANOMETALLICS REPORTING_01.m |
| <b>Plate Pos.</b>     |              | <b>Target Source Path</b> |                                                                        |
| <b>Operator</b>       |              | <b>Result Summary</b>     | 1 qualified (1 targets)                                                |

## Compound Summary

| Cpd | Name | Formula         | CAS | RT    | Mass     | Mass (Tgt) | Diff (Tgt, ppm) | Score | Algorithm |
|-----|------|-----------------|-----|-------|----------|------------|-----------------|-------|-----------|
| 1   |      | C17 H24 Co N2 S |     | 0.264 | 347.0986 | 347.0992   | -1.90           | 97.25 | FBF       |

## Compound Details

### Cpd. 1: C17 H24 Co N2 S

| Name        | Formula           | RT          | RI          | Mass       | Diff (Tgt, ppm) | CAS        | ID Source | Score | Algorithm |
|-------------|-------------------|-------------|-------------|------------|-----------------|------------|-----------|-------|-----------|
|             | C17 H24 Co N2 S   | 0.264       |             | 347.0986   | -1.90           |            | FBF       | 97.25 | FBF       |
| Species     | m/z               | Score (Tgt) | Score (Lib) | Score (DB) | Score (MFG)     | Score (RT) |           |       |           |
| M+ (M+NH4)+ | 347.0980 365.1293 | 97.25       |             |            |                 |            |           |       |           |

### Compound Chromatograms (overlaid)

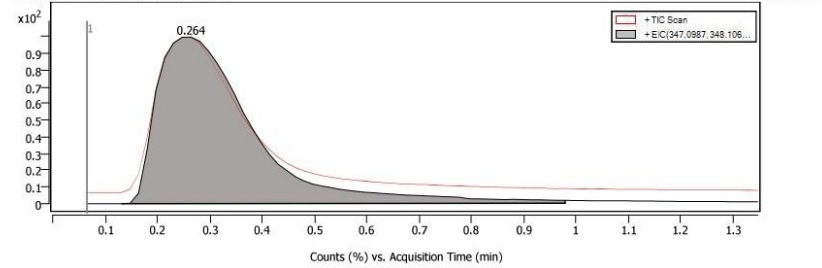

### Compound Spectra (overlaid)

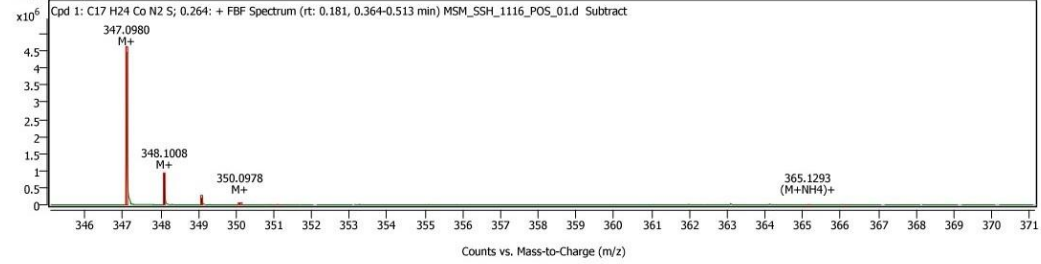

### Compound ID Table

| Name | Formula         | Species     | RT    | RT Diff | Mass     | CAS | ID Source | Score | Score (Lib) | Score (Tgt) |
|------|-----------------|-------------|-------|---------|----------|-----|-----------|-------|-------------|-------------|
|      | C17 H24 Co N2 S | M+ (M+NH4)+ | 0.264 |         | 347.0986 |     | FBF       | 97.25 |             | 97.25       |

MassHunter Qual 10.0  
(End of Report)

## User Spectrum Plot Report

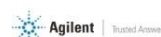

|                |                        |              |                    |                   |                                  |
|----------------|------------------------|--------------|--------------------|-------------------|----------------------------------|
| Name           | MSM_SSH_1116           | Rack Pos.    | Instrument         | IITKGP            | Operator                         |
| Inj. Vol. (ul) | 2                      | Plate Pos.   | IRM Status         | Success           |                                  |
| Data File      | MSM_SSH_1116_POS_0_1.d | Method (Acq) | Comment            | Acq. Time (Local) | 8/4/2022 12:10:14 PM (UTC+05:30) |
|                |                        | MS SCAN      | POS_ORGANOMETALLIC |                   |                                  |
|                |                        | S_03.m       |                    |                   |                                  |

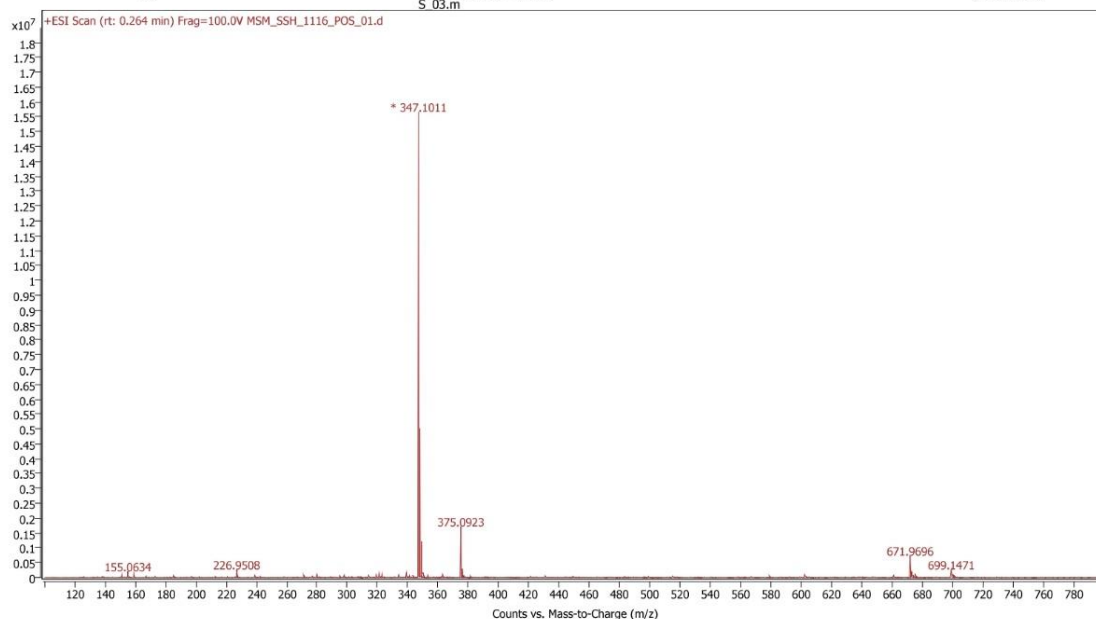

Page 1 of 2

Generated at 12:42 PM on 8/4/2022

### Single Crystal X-ray Diffraction:

Single crystals of **6a** and **4a** were grown by slow evaporation of their saturated ethylacetate solution. Single crystal X-ray data were collected at 150 K on a Bruker SMART APEX II CCD diffractometer using graphite-monochromated Mo-K $\alpha$  radiation (0.71073 Å). The data collection was evaluated by using the Crystal Clear-SM Expert software. The data were collected by the standard  $\omega$ -scan technique. The structure was solved by direct method using SHELXS-97 and refined by full matrix least-squares with SHELXL-2018, refining on  $F^2$ .<sup>3</sup> All data were corrected for Lorentz and polarization effects and all non-hydrogen atoms were refined anisotropically. The remaining hydrogen atoms were placed in geometrically constrained positions and refined with isotropic temperature factors, generally  $1.2U_{eq}$  of their parent atoms. Hydrogen atoms were included in the refinement process as per the riding model. Supplementary crystallographic data for the compounds mentioned in the paper may be obtained free of charge from the Crystallographic Data Center ([www.ccdc.cam.ac.uk/data\\_request/cif](http://www.ccdc.cam.ac.uk/data_request/cif)) using CCDC numbers 2131973 (**6a**), 2131974 (**4a**). The alert B in the checkCIF of **4a** was developed due to the weakly diffracting nature of the crystal.

**Table S3. Selected Crystallographic Parameters**

| complex                                                  | <b>4a</b>                                         | <b>6a</b>                                         |
|----------------------------------------------------------|---------------------------------------------------|---------------------------------------------------|
| CCDC                                                     | <b>2131974</b>                                    | <b>2131973</b>                                    |
| empirical formula                                        | C <sub>14</sub> H <sub>15</sub> N <sub>3</sub> OS | C <sub>14</sub> H <sub>15</sub> N <sub>3</sub> OS |
| formula weight                                           | 273.35                                            | 273.35                                            |
| crystal system                                           | Triclinic                                         | Triclinic                                         |
| space group                                              | P-1                                               | P-1                                               |
| <i>a</i> (Å)                                             | 9.1959(7)                                         | 9.831(4)                                          |
| <i>b</i> (Å)                                             | 9.4051(6)                                         | 9.988(7)                                          |
| <i>c</i> (Å)                                             | 17.0462(15)                                       | 14.908(7)                                         |
| $\alpha$ (deg)                                           | 81.503(6)                                         | 91.97(2)                                          |
| $\beta$ (deg)                                            | 82.539(7)                                         | 97.090(12)                                        |
| $\gamma$ (deg)                                           | 82.743(6)                                         | 103.993(18)                                       |
| <i>V</i> (Å <sup>3</sup> )                               | 1437.12(19)                                       | 1406.3(13)                                        |
| <i>Z</i>                                                 | 4                                                 | 4                                                 |
| $\mu$ (mm <sup>-1</sup> )                                | 0.221                                             | 0.226                                             |
| $\rho_{\text{calcd}}$ (g cm <sup>-3</sup> )              | 1.263                                             | 1.291                                             |
| <i>T</i> (K)                                             | 150(2)                                            | 150(2)                                            |
| <i>F</i> (000)                                           | 576                                               | 576                                               |
| $\theta$ range (deg)                                     | 2.187 to 27.248                                   | 2.396 to 26.666                                   |
| data/restraints /parameters                              | 12300/0/348                                       | 5968/0/343                                        |
| $R_1, wR_2 [I > 2\sigma(I)]$                             | 0.0679, 0.1571                                    | 0.0473, 0.1285                                    |
| $R_1, wR_2$ (all data)                                   | 0.2145, 0.2289                                    | 0.0653, 0.1451                                    |
| <i>GOF</i> on $F^2$                                      | 0.934                                             | 1.049                                             |
| largest difference in peak and hole (e Å <sup>-3</sup> ) | 0.204, -0.209                                     | 0.389, -0.291                                     |

**Table S4. Selected Experimental Bond Lengths (Å)**

| Bond lengths | <b>4a</b> | Bond lengths | <b>6a</b> |
|--------------|-----------|--------------|-----------|
| C1-N1        | 1.403(3)  | C1-N1        | 1.388(3)  |
| C1-C5        | 1.450(3)  | C1-N2        | 1.395(3)  |
| C5-N2        | 1.354(3)  | C5-N2        | 1.362(3)  |
| C5-O1        | 1.232(2)  | C5-O1        | 1.225(3)  |
| C12-N1       | 1.441(3)  | C12-N1       | 1.418(3)  |
| C12-S1       | 1.645(3)  | C12-S1       | 1.661(2)  |
| C12-N3       | 1.323(3)  | C12-N3       | 1.326(3)  |
| C4-N1        | 1.362(3)  | C4-N1        | 1.384(3)  |
| C1-C2        | 1.380(3)  | C1-C2        | 1.358(3)  |
| C2-C3        | 1.401(3)  | C2-C3        | 1.409(4)  |
| C3-C4        | 1.364(4)  | C3-C4        | 1.351(4)  |

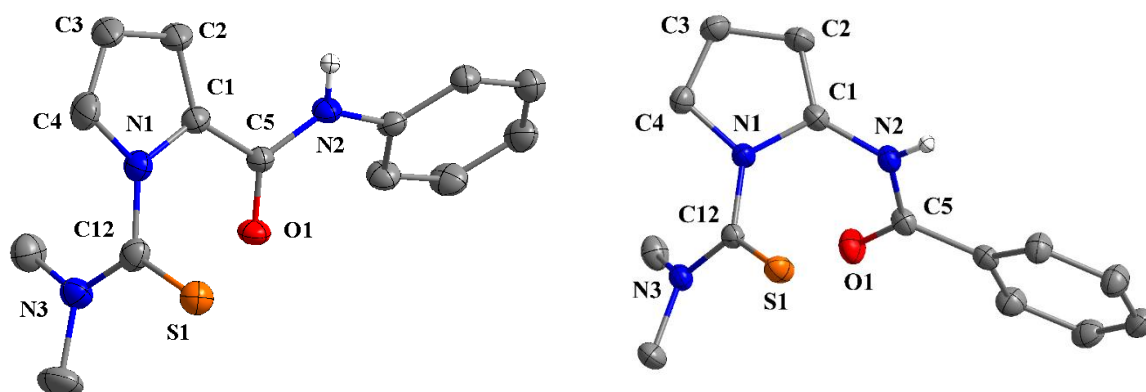**Figure S6.** Perspective views at 25% probability level of **4a** and **6a**. Hydrogen atoms (except the N-H) are omitted for clarity.**Computational Studies:**

All the calculations were performed with the Gaussian 16, Revision B.01 program package.<sup>4</sup> Geometry optimization and frequency analysis were conducted using B3LYP function.<sup>5</sup> During geometry optimization we used TZVP basis set for non-metal atoms and the SDD basis set for cobalt. In all cases, ultrafine integral grid was employed. To refine the computed energy, single point calculations were performed using the B3LYP functional with the Def2-TZVP basis set for non-metal atoms and the SDD basis set for cobalt with considering the Grimme's D3 (BJ-damping) dispersion effect. The SMD solvent model<sup>6</sup> was used to simulate the implicit solvent effect (due to similar dielectric constant we have used 1,1,2-

trichloroethane instead of our experimentally used solvent 1,1,2,2-tetrachloroethane). Transition state optimizations were performed starting from infinitely separated substrates. Single imaginary frequency for the transition states (TSs) and real frequencies for local minima were obtained. The connectivity of each TS was validated through a relaxed potential energy surface scan for the corresponding reaction coordinate, and was found to be the highest-energy point that connected the relevant reactant and product. The geometries were optimized without any symmetry constraints. The zero-point vibrational energies (ZPVE), thermal corrections were obtained by using the temperature 373.15 K and 1 atm pressure. Unless otherwise specified, the  $\Delta G$  was used throughout the text. All calculated structures were visualized with ChemCraft.<sup>7</sup>

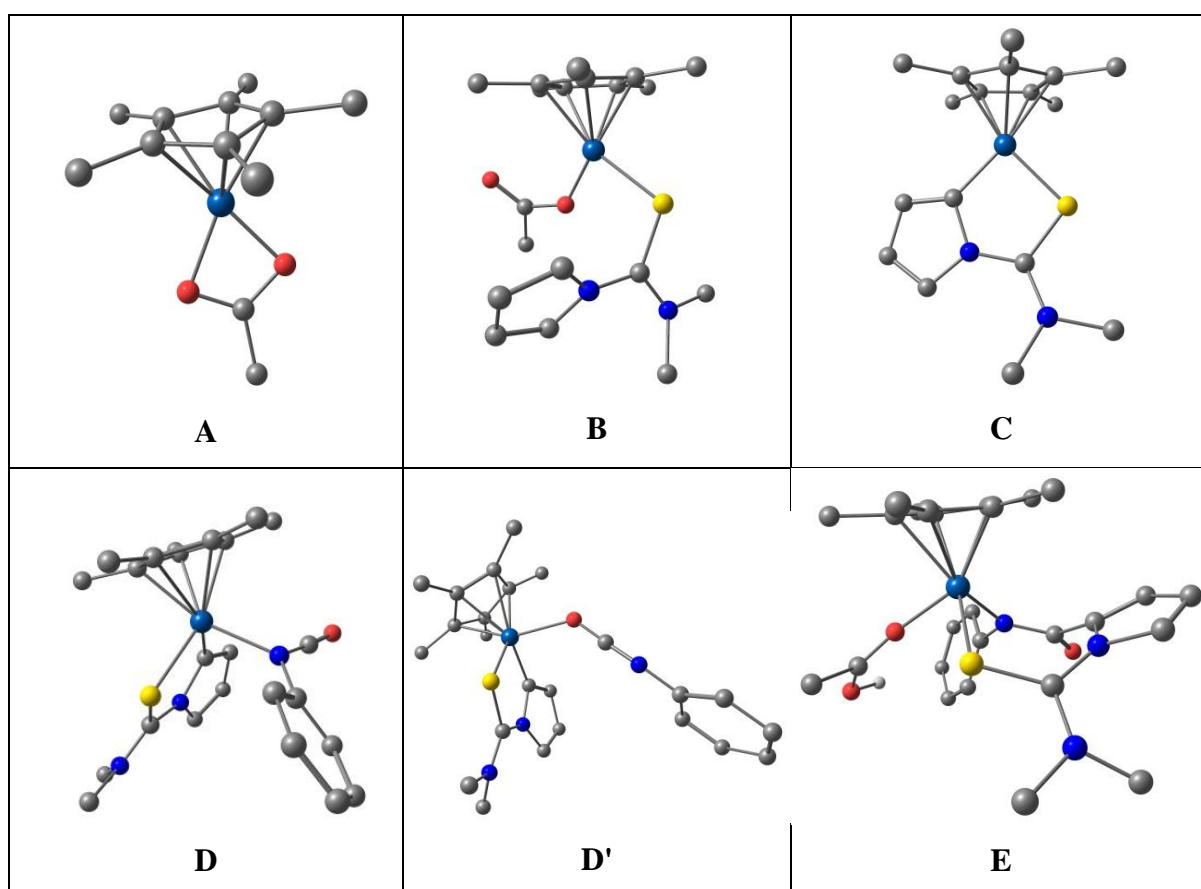



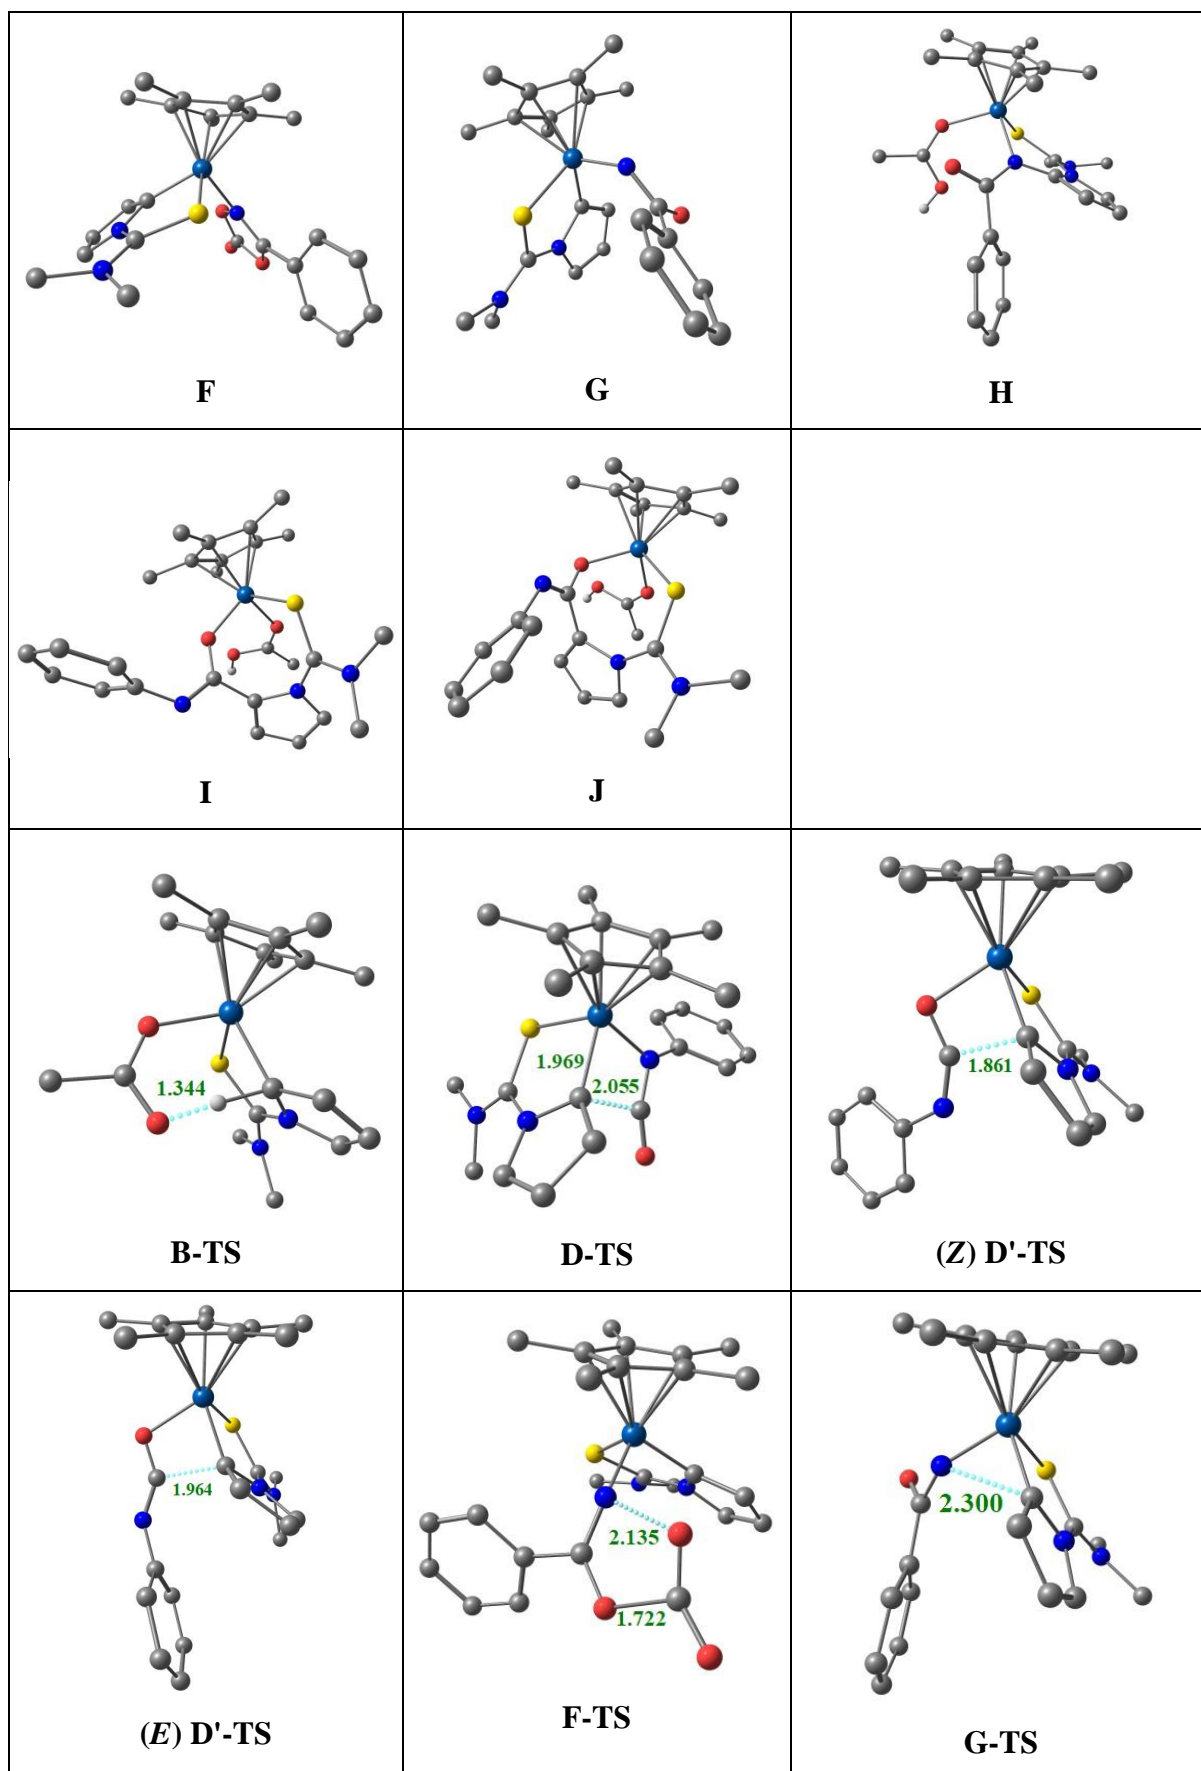

**Figure S7.** DFT optimized structures. Hydrogen atoms are removed for clarity.

**Table S5.** Electronic and Gibbs free energies (in Hartree) at the at B3LYP(SMD)/Def2-TZVP/SDD//B3LYP/TZVP/SDD level of theory (Substrate is **1a**).

| Structures            | <i>E</i>     | <i>G</i>     | Structures       | <i>E</i>     | <i>G</i>     |
|-----------------------|--------------|--------------|------------------|--------------|--------------|
| <b>CO<sub>2</sub></b> | -188.657331  | -188.688910  | <b>F</b>         | -1904.086925 | -1904.229991 |
| <b>AcOH</b>           | -229.133340  | -229.176376  | <b>G</b>         | -1715.421784 | -1715.560058 |
| <b>1a</b>             | -780.477221  | -780.540688  | <b>H</b>         | -1944.643375 | -1944.796129 |
| <b>2a</b>             | -399.803920  | -399.858622  | <b>I</b>         | -1944.634086 | -1944.788515 |
| <b>5a</b>             | -588.388910  | -588.449822  | <b>J</b>         | -1944.630074 | -1944.787704 |
| <b>A</b>              | -764.312618  | -764.405933  | <b>B-TS</b>      | -1544.823784 | -1544.949327 |
| <b>B</b>              | -1544.820162 | -1544.952278 | <b>D-TS</b>      | -1715.484643 | -1715.618908 |
| <b>C</b>              | -1315.672132 | -1315.782421 | <b>(Z) D'-TS</b> | -1715.460538 | -1715.594062 |
| <b>D</b>              | -1715.492516 | -1715.630095 | <b>(E) D'-TS</b> | -1715.471595 | -1715.606005 |
| <b>D'</b>             | -1715.486681 | -1715.629715 | <b>F-TS</b>      | -1904.056098 | -1904.200931 |
| <b>E</b>              | -1944.644009 | -1944.798107 | <b>G-TS</b>      | -1715.418419 | -1715.554620 |

*G* = Sum of electronic and thermal free energies.

**Table S6.** Cartesian coordinates (Å) of the optimized structures of all intermediates and transition states involved in the C–H amidation of pyrrole at B3LYP/TZVP/SDD level of theory.

|                       |              |              |               |              |               |               |               |
|-----------------------|--------------|--------------|---------------|--------------|---------------|---------------|---------------|
| <b>CO<sub>2</sub></b> |              |              | H             | -7.167725000 | -6.496622000  | -12.015411000 |               |
| C                     | -8.657806000 | 0.707085000  | -4.943568000  | H            | -4.575626000  | -6.787336000  | -12.712614000 |
| O                     | -8.232219000 | 1.779047000  | -4.815109000  | S            | -7.577553000  | -4.736445000  | -8.162450000  |
| O                     | -9.083393000 | -0.364876000 | -5.072028000  | N            | -8.654616000  | -4.618142000  | -10.614218000 |
| <b>AcOH</b>           |              |              | C             | -8.587638000 | -4.069982000  | -11.973030000 |               |
| O                     | -5.446721000 | -5.792465000 | -9.011001000  | H            | -9.083933000  | -4.733860000  | -12.684607000 |
| C                     | -4.334769000 | -6.562618000 | -9.140134000  | H            | -7.558493000  | -3.927571000  | -12.282951000 |
| O                     | -3.222815000 | -6.108175000 | -9.057569000  | H            | -9.097877000  | -3.102686000  | -11.988373000 |
| C                     | -4.687035000 | -8.002135000 | -9.390197000  | C            | -9.975051000  | -4.526946000  | -10.000930000 |
| H                     | -5.291468000 | -8.385477000 | -8.566524000  | H            | -10.061827000 | -5.254313000  | -9.198200000  |
| H                     | -5.283967000 | -8.086134000 | -10.299793000 | H            | -10.722812000 | -4.729685000  | -10.768436000 |
| H                     | -3.776777000 | -8.587025000 | -9.487316000  | H            | -10.150258000 | -3.532544000  | -9.579168000  |
| H                     | -5.146988000 | -4.883540000 | -8.852450000  | H            | -4.964176000  | -4.089535000  | -9.338189000  |
| <b>1a</b>             |              |              | <b>2a</b>     |              |               |               |               |
| C                     | -7.566551000 | -4.818836000 | -9.830768000  | C            | -8.244533000  | -9.574833000  | -7.821869000  |
| C                     | -4.221517000 | -5.345795000 | -11.025270000 | C            | -8.158885000  | -8.446254000  | -7.012503000  |
| C                     | -5.106876000 | -4.752366000 | -10.172351000 | C            | -7.231554000  | -9.841569000  | -8.738885000  |
| N                     | -6.386633000 | -5.145127000 | -10.534069000 | H            | -8.942048000  | -8.230749000  | -6.296316000  |
| C                     | -6.290852000 | -6.022191000 | -11.612347000 | H            | -7.289420000  | -10.717571000 | -9.373104000  |
| C                     | -4.970420000 | -6.159919000 | -11.929810000 | C            | -7.071654000  | -7.587470000  | -7.114616000  |
| H                     | -3.151416000 | -5.219357000 | -11.006999000 | C            | -6.139827000  | -8.990688000  | -8.850255000  |
|                       |              |              |               | H            | -6.994231000  | -6.707052000  | -6.490702000  |

|   |              |               |              |
|---|--------------|---------------|--------------|
| H | -5.351780000 | -9.198170000  | -9.563641000 |
| C | -6.058398000 | -7.857855000  | -8.034742000 |
| H | -9.093237000 | -10.241786000 | -7.739528000 |
| N | -4.980037000 | -6.975983000  | -8.113003000 |
| C | -3.947205000 | -6.782120000  | -8.689960000 |
| O | -2.926414000 | -6.495440000  | -9.186915000 |

**5a**

|   |               |              |              |
|---|---------------|--------------|--------------|
| C | -9.622337000  | -7.151444000 | -7.266909000 |
| C | -9.091775000  | -5.983751000 | -6.720618000 |
| C | -8.820824000  | -7.986998000 | -8.037133000 |
| H | -9.715588000  | -5.333108000 | -6.121027000 |
| H | -9.230870000  | -8.894209000 | -8.462249000 |
| C | -7.765175000  | -5.649946000 | -6.941738000 |
| C | -7.489365000  | -7.662119000 | -8.265278000 |
| H | -7.346412000  | -4.745261000 | -6.521085000 |
| H | -6.863831000  | -8.310325000 | -8.863973000 |
| C | -6.957509000  | -6.491157000 | -7.717333000 |
| H | -10.659688000 | -7.407622000 | -7.091022000 |
| C | -5.562772000  | -6.140729000 | -7.950011000 |
| N | -4.949643000  | -5.101612000 | -7.508121000 |
| O | -3.623968000  | -5.227382000 | -8.011639000 |
| O | -4.780839000  | -6.961023000 | -8.706183000 |
| C | -3.529587000  | -6.366641000 | -8.742786000 |
| O | -2.577355000  | -6.785873000 | -9.306777000 |

**A**

|    |              |              |              |
|----|--------------|--------------|--------------|
| Co | -5.477637000 | -4.221522000 | -8.093594000 |
| C  | -5.827346000 | -2.464898000 | -7.038095000 |
| C  | -5.199075000 | -3.498936000 | -6.239440000 |
| C  | -3.899171000 | -3.790240000 | -6.811440000 |
| C  | -3.773660000 | -3.021803000 | -7.987349000 |
| C  | -4.974084000 | -2.196808000 | -8.128514000 |
| C  | -7.169638000 | -1.873205000 | -6.768625000 |
| H  | -7.888112000 | -2.630736000 | -6.455590000 |
| H  | -7.574012000 | -1.365495000 | -7.641526000 |
| H  | -7.090651000 | -1.139515000 | -5.960827000 |
| C  | -5.754901000 | -4.094745000 | -4.994693000 |
| H  | -5.391357000 | -5.107885000 | -4.829598000 |
| H  | -6.843802000 | -4.107620000 | -4.999206000 |
| H  | -5.438827000 | -3.490351000 | -4.136683000 |
| C  | -2.930785000 | -4.787386000 | -6.270703000 |
| H  | -2.185470000 | -5.073984000 | -7.009400000 |
| H  | -3.433345000 | -5.692402000 | -5.929558000 |
| H  | -2.404615000 | -4.358586000 | -5.412594000 |
| C  | -2.637690000 | -3.032343000 | -8.952802000 |

|   |              |              |               |
|---|--------------|--------------|---------------|
| H | -2.980811000 | -2.976545000 | -9.986570000  |
| H | -2.016899000 | -3.919204000 | -8.844964000  |
| H | -2.002906000 | -2.157251000 | -8.779270000  |
| C | -5.223788000 | -1.255060000 | -9.256979000  |
| H | -6.276049000 | -0.993987000 | -9.347322000  |
| H | -4.888017000 | -1.663816000 | -10.210733000 |
| H | -4.663097000 | -0.329359000 | -9.091006000  |
| O | -7.200801000 | -4.905013000 | -8.617461000  |
| C | -6.670795000 | -6.066369000 | -8.731911000  |
| O | -5.432131000 | -6.121748000 | -8.407239000  |
| C | -7.433935000 | -7.254146000 | -9.185213000  |
| H | -7.864781000 | -7.741229000 | -8.305175000  |
| H | -8.249488000 | -6.954346000 | -9.840694000  |
| H | -6.772540000 | -7.965640000 | -9.676286000  |

**B**

|    |              |              |              |
|----|--------------|--------------|--------------|
| Co | 0.920306000  | -0.191459000 | -0.126030000 |
| C  | 2.343004000  | -1.564530000 | 0.571033000  |
| C  | 2.748516000  | -0.975852000 | -0.668961000 |
| C  | 2.903039000  | 0.446973000  | -0.475590000 |
| C  | 2.535970000  | 0.738836000  | 0.863483000  |
| C  | 2.162716000  | -0.504442000 | 1.505015000  |
| C  | -2.289919000 | -0.926517000 | -0.020737000 |
| C  | 2.182588000  | -3.026045000 | 0.839047000  |
| H  | 1.846288000  | -3.571809000 | -0.041749000 |
| H  | 1.477689000  | -3.220313000 | 1.645627000  |
| H  | 3.147744000  | -3.447150000 | 1.135875000  |
| C  | 3.020520000  | -1.706325000 | -1.939936000 |
| H  | 2.768975000  | -1.105970000 | -2.813506000 |
| H  | 2.474272000  | -2.646509000 | -1.996237000 |
| H  | 4.088313000  | -1.941438000 | -2.004066000 |
| C  | 3.434948000  | 1.400184000  | -1.491425000 |
| H  | 3.105326000  | 2.416803000  | -1.297768000 |
| H  | 3.127298000  | 1.130192000  | -2.501665000 |
| H  | 4.529412000  | 1.375117000  | -1.467288000 |
| C  | 2.563044000  | 2.068874000  | 1.532505000  |
| H  | 1.772073000  | 2.161462000  | 2.276380000  |
| H  | 2.446749000  | 2.876912000  | 0.817163000  |
| H  | 3.518968000  | 2.184523000  | 2.055442000  |
| C  | 1.746204000  | -0.640781000 | 2.930948000  |
| H  | 1.176590000  | -1.552187000 | 3.103862000  |
| H  | 1.150160000  | 0.209687000  | 3.260059000  |
| H  | 2.634658000  | -0.679596000 | 3.569639000  |
| C  | -2.468357000 | 1.606151000  | 2.478998000  |
| C  | -2.048190000 | 0.384789000  | 2.058672000  |

N -2.551041000 0.173603000 0.768486000  
 C -3.276555000 1.313726000 0.391111000  
 C -3.229586000 2.200009000 1.418709000  
 H -2.275122000 2.038881000 3.446812000  
 H -3.697177000 1.398040000 -0.594191000  
 H -3.674391000 3.181717000 1.420209000  
 S -0.756334000 -1.732548000 0.064046000  
 N -3.263497000 -1.403959000 -0.785903000  
 C -4.697272000 -1.171102000 -0.533421000  
 H -5.126636000 -0.538213000 -1.310908000  
 H -4.847270000 -0.708967000 0.435906000  
 H -5.198026000 -2.139440000 -0.554237000  
 C -3.002430000 -2.372002000 -1.860183000  
 H -1.997425000 -2.236498000 -2.245981000  
 H -3.730087000 -2.199634000 -2.652104000  
 H -3.111973000 -3.392919000 -1.489571000  
 O -0.188786000 0.934193000 -1.069923000  
 C 0.008266000 2.200573000 -1.423321000  
 O 0.821022000 2.939065000 -0.903576000  
 C -0.915534000 2.657855000 -2.532221000  
 H -0.914098000 1.942308000 -3.355256000  
 H -1.936404000 2.719621000 -2.150236000  
 H -0.611757000 3.639819000 -2.886232000  
 H -1.493557000 -0.390359000 2.554332000  
**C**  
 Co -5.587935000 -3.911288000 -8.220358000  
 C -5.672261000 -2.714571000 -6.469565000  
 C -4.980518000 -3.916920000 -6.206231000  
 C -3.832021000 -3.991772000 -7.096879000  
 C -3.825747000 -2.828849000 -7.905181000  
 C -5.000880000 -2.063725000 -7.565750000  
 C -7.733732000 -4.847494000 -10.133238000  
 C -6.882267000 -2.196429000 -5.758969000  
 H -7.454194000 -2.996175000 -5.290286000  
 H -7.548410000 -1.656492000 -6.431146000  
 H -6.580897000 -1.502317000 -4.969141000  
 C -5.327802000 -4.951996000 -5.187893000  
 H -5.184383000 -5.962036000 -5.573378000  
 H -6.357819000 -4.861373000 -4.848142000  
 H -4.678884000 -4.845138000 -4.312796000  
 C -2.819417000 -5.088988000 -7.078307000  
 H -2.203587000 -5.092372000 -7.975292000  
 H -3.286729000 -6.069670000 -6.985647000  
 H -2.152958000 -4.964082000 -6.219015000

C -2.779383000 -2.406916000 -8.884520000  
 H -3.213169000 -1.980843000 -9.788339000  
 H -2.134558000 -3.233804000 -9.175156000  
 H -2.142318000 -1.641712000 -8.430917000  
 C -5.392782000 -0.763753000 -8.182787000  
 H -6.467903000 -0.597565000 -8.132425000  
 H -5.083308000 -0.701887000 -9.225362000  
 H -4.907771000 0.059630000 -7.647163000  
 C -4.280702000 -5.048982000 -10.712616000  
 C -5.347236000 -4.621646000 -9.961096000  
 N -6.501860000 -5.033795000 -10.690318000  
 C -6.105130000 -5.747810000 -11.839183000  
 C -4.749399000 -5.756415000 -11.866582000  
 H -3.243312000 -4.901109000 -10.463158000  
 H -6.805300000 -6.219164000 -12.500784000  
 H -4.144964000 -6.232997000 -12.621817000  
 S -7.738699000 -4.312327000 -8.467027000  
 N -8.871275000 -5.013427000 -10.795495000  
 C -8.991462000 -5.021871000 -12.261531000  
 H -9.064936000 -6.039999000 -12.648248000  
 H -8.150681000 -4.509231000 -12.718989000  
 H -9.904472000 -4.487482000 -12.519281000  
 C -10.161330000 -5.011899000 -10.086746000  
 H -10.042667000 -5.399611000 -9.079925000  
 H -10.846923000 -5.655075000 -10.635578000  
 H -10.571654000 -4.001041000 -10.040772000

**D**

Co -5.368457000 -4.544713000 -8.346869000  
 C -5.987910000 -3.456124000 -6.557351000  
 C -4.935952000 -4.313458000 -6.197888000  
 C -3.781612000 -3.988005000 -7.017229000  
 C -4.122460000 -2.877377000 -7.832971000  
 C -5.511242000 -2.597414000 -7.628104000  
 C -7.150605000 -4.446417000 -10.841048000  
 C -7.340709000 -3.360977000 -5.927138000  
 H -7.592959000 -4.253442000 -5.356129000  
 H -8.124380000 -3.199870000 -6.667684000  
 H -7.368149000 -2.512924000 -5.236336000  
 C -4.927104000 -5.332683000 -5.104007000  
 H -4.502212000 -6.283392000 -5.428145000  
 H -5.923934000 -5.524588000 -4.711684000  
 H -4.313230000 -4.973735000 -4.272634000  
 C -2.412791000 -4.567348000 -6.840737000  
 H -1.830396000 -4.539003000 -7.760931000

|           |               |               |               |   |               |               |               |
|-----------|---------------|---------------|---------------|---|---------------|---------------|---------------|
| H         | -2.443083000  | -5.599717000  | -6.493820000  | C | -5.625619000  | -2.238335000  | -6.680724000  |
| H         | -1.860459000  | -3.994364000  | -6.089045000  | C | -4.905673000  | -3.186260000  | -5.937924000  |
| C         | -3.186264000  | -2.071857000  | -8.670797000  | C | -3.795211000  | -3.656248000  | -6.753463000  |
| H         | -3.670326000  | -1.667462000  | -9.557235000  | C | -3.823009000  | -2.956475000  | -7.982936000  |
| H         | -2.320802000  | -2.647445000  | -8.991951000  | C | -5.013327000  | -2.148609000  | -7.994929000  |
| H         | -2.818592000  | -1.229037000  | -8.076204000  | C | -7.700100000  | -4.543660000  | -9.962006000  |
| C         | -6.265200000  | -1.451118000  | -8.220572000  | C | -6.796754000  | -1.431356000  | -6.221227000  |
| H         | -7.332221000  | -1.658786000  | -8.282330000  | H | -7.312518000  | -1.898433000  | -5.383353000  |
| H         | -5.907705000  | -1.209333000  | -9.220991000  | H | -7.521182000  | -1.274268000  | -7.019725000  |
| H         | -6.135794000  | -0.557685000  | -7.601132000  | H | -6.456172000  | -0.445495000  | -5.890271000  |
| C         | -3.644489000  | -4.596871000  | -10.859678000 | C | -5.174021000  | -3.635795000  | -4.538610000  |
| C         | -4.828688000  | -4.468154000  | -10.192897000 | H | -5.068860000  | -4.716157000  | -4.438545000  |
| N         | -5.835034000  | -4.449253000  | -11.202264000 | H | -6.174113000  | -3.361360000  | -4.207145000  |
| C         | -5.233682000  | -4.617890000  | -12.469109000 | H | -4.458833000  | -3.172541000  | -3.852215000  |
| C         | -3.897060000  | -4.700943000  | -12.271242000 | C | -2.756777000  | -4.625855000  | -6.290419000  |
| H         | -2.667124000  | -4.645112000  | -10.408578000 | H | -2.172941000  | -5.023538000  | -7.119089000  |
| H         | -5.803846000  | -4.707917000  | -13.372333000 | H | -3.203112000  | -5.464944000  | -5.756305000  |
| H         | -3.160005000  | -4.839767000  | -13.046420000 | H | -2.060815000  | -4.134702000  | -5.603280000  |
| S         | -7.482739000  | -4.670142000  | -9.156991000  | C | -2.782505000  | -2.979532000  | -9.052955000  |
| N         | -8.142433000  | -4.271961000  | -11.716391000 | H | -3.214205000  | -2.882303000  | -10.047047000 |
| C         | -8.002931000  | -3.582750000  | -13.008046000 | H | -2.188618000  | -3.891109000  | -9.030861000  |
| H         | -8.002617000  | -4.289668000  | -13.839931000 | H | -2.098252000  | -2.138497000  | -8.901612000  |
| H         | -7.097331000  | -2.985138000  | -13.031523000 | C | -5.404233000  | -1.188149000  | -9.071186000  |
| H         | -8.857634000  | -2.916404000  | -13.121281000 | H | -6.480496000  | -1.021285000  | -9.089266000  |
| C         | -9.532116000  | -4.530564000  | -11.318272000 | H | -5.098708000  | -1.542581000  | -10.055121000 |
| H         | -9.578172000  | -5.366954000  | -10.626452000 | H | -4.922712000  | -0.218749000  | -8.906661000  |
| H         | -10.098533000 | -4.781127000  | -12.213557000 | C | -4.430664000  | -5.811351000  | -10.000766000 |
| H         | -9.974649000  | -3.649343000  | -10.847262000 | C | -5.394008000  | -5.014335000  | -9.452032000  |
| C         | -8.129788000  | -9.620584000  | -7.767865000  | N | -6.509188000  | -5.099294000  | -10.335575000 |
| C         | -8.120674000  | -8.478006000  | -6.974313000  | C | -6.206809000  | -5.985705000  | -11.392741000 |
| C         | -7.155908000  | -9.787856000  | -8.746812000  | C | -4.937370000  | -6.419041000  | -11.201567000 |
| H         | -8.876417000  | -8.340784000  | -6.211458000  | H | -3.447818000  | -5.978638000  | -9.591147000  |
| H         | -7.156907000  | -10.671491000 | -9.372020000  | H | -6.921614000  | -6.255331000  | -12.144984000 |
| C         | -7.142999000  | -7.505762000  | -7.150875000  | H | -4.413318000  | -7.109045000  | -11.844426000 |
| C         | -6.176126000  | -8.819767000  | -8.934439000  | S | -7.794963000  | -3.956530000  | -8.331955000  |
| H         | -7.133692000  | -6.617436000  | -6.537039000  | N | -8.738077000  | -4.438195000  | -10.791342000 |
| H         | -5.428617000  | -8.946806000  | -9.708623000  | C | -8.633434000  | -4.429031000  | -12.257929000 |
| C         | -6.170390000  | -7.685547000  | -8.125970000  | H | -8.967346000  | -5.375490000  | -12.687512000 |
| H         | -8.891562000  | -10.375799000 | -7.624845000  | H | -7.615290000  | -4.220544000  | -12.570684000 |
| N         | -5.146313000  | -6.677361000  | -8.293961000  | H | -9.278386000  | -3.633793000  | -12.630728000 |
| C         | -3.998295000  | -6.957407000  | -8.639326000  | C | -10.060808000 | -4.059116000  | -10.277548000 |
| O         | -2.901533000  | -7.162935000  | -8.938494000  | H | -10.215068000 | -4.473912000  | -9.285530000  |
| <b>D'</b> |               |               |               | H | -10.813655000 | -4.464274000  | -10.951478000 |
| Co        | -5.606177000  | -4.107446000  | -7.775544000  | H | -10.164544000 | -2.972378000  | -10.232322000 |
|           |               |               |               | C | -8.069728000  | -11.705012000 | -8.667539000  |

C -8.731950000 -11.137768000 -7.582850000  
 C -7.033683000 -11.013561000 -9.289711000  
 H -9.536639000 -11.673560000 -7.096202000  
 H -6.516254000 -11.453740000 -10.132517000  
 C -8.364985000 -9.882472000 -7.115316000  
 C -6.653109000 -9.758357000 -8.834034000  
 H -8.869763000 -9.431027000 -6.271740000  
 H -5.850882000 -9.210558000 -9.310663000  
 C -7.322687000 -9.201433000 -7.743041000  
 H -8.358621000 -12.684407000 -9.026275000  
 N -6.953293000 -7.946116000 -7.268109000  
 C -6.371231000 -6.958659000 -7.027676000  
 O -5.824655000 -5.941067000 -6.722372000

**E**

Co -7.827177000 -3.878020000 -8.764249000  
 C -7.280533000 -2.108393000 -7.587046000  
 C -7.919137000 -3.047977000 -6.761334000  
 C -7.141145000 -4.272250000 -6.805949000  
 C -5.997380000 -4.037986000 -7.631249000  
 C -6.111853000 -2.727748000 -8.173081000  
 C -7.671908000 -0.685029000 -7.802931000  
 H -8.719297000 -0.501782000 -7.569198000  
 H -7.476973000 -0.360449000 -8.824346000  
 H -7.076702000 -0.044983000 -7.143589000  
 C -9.107237000 -2.814346000 -5.885203000  
 H -9.749188000 -3.692321000 -5.828476000  
 H -9.712007000 -1.976369000 -6.230113000  
 H -8.777152000 -2.581048000 -4.868245000  
 C -7.354931000 -5.439500000 -5.902359000  
 H -6.918640000 -6.352741000 -6.298201000  
 H -8.411985000 -5.618366000 -5.712642000  
 H -6.881412000 -5.236441000 -4.935692000  
 C -4.863118000 -4.983498000 -7.835829000  
 H -4.392829000 -4.858167000 -8.808561000  
 H -5.180267000 -6.019622000 -7.744489000  
 H -4.101782000 -4.800038000 -7.070587000  
 C -5.114430000 -1.999804000 -9.015393000  
 H -5.562544000 -1.593545000 -9.923124000  
 H -4.287458000 -2.641758000 -9.308765000  
 H -4.694661000 -1.161877000 -8.451108000  
 C -10.009258000 -6.461980000 -8.623236000  
 S -9.955452000 -4.750835000 -8.714338000  
 N -11.166461000 -7.103282000 -8.788421000  
 C -12.433718000 -6.368810000 -8.852565000

H -12.578691000 -5.934110000 -9.844377000  
 H -13.241520000 -7.067407000 -8.645471000  
 H -12.446377000 -5.572261000 -8.112354000  
 C -11.265010000 -8.524254000 -9.173327000  
 H -10.286741000 -8.932066000 -9.399927000  
 H -11.891923000 -8.582551000 -10.063884000  
 C -6.913985000 -8.242847000 -8.317105000  
 C -7.623903000 -7.228115000 -8.900208000  
 N -8.899984000 -7.235181000 -8.308024000  
 C -8.936834000 -8.247789000 -7.337620000  
 C -7.722600000 -8.859186000 -7.319262000  
 H -5.922616000 -8.537649000 -8.619333000  
 H -9.814460000 -8.391355000 -6.732142000  
 H -7.434184000 -9.660219000 -6.658126000  
 H -11.727759000 -9.106691000 -8.376108000  
 C -7.207128000 -6.488589000 -10.140439000  
 O -6.785428000 -7.185828000 -11.062454000  
 N -7.264252000 -5.135577000 -10.172477000  
 C -6.954449000 -4.585782000 -11.461002000  
 C -5.696617000 -4.059448000 -11.742599000  
 C -7.922870000 -4.579980000 -12.470014000  
 H -4.921815000 -4.110831000 -10.991279000  
 H -8.889181000 -5.028142000 -12.273717000  
 C -5.418518000 -3.500202000 -12.986878000  
 C -7.647954000 -4.026549000 -13.716313000  
 H -4.431639000 -3.102055000 -13.188488000  
 H -8.402269000 -4.049555000 -14.494092000  
 C -6.394677000 -3.470413000 -13.975974000  
 H -6.177110000 -3.044958000 -14.947315000  
 O -8.481401000 -2.576169000 -10.208572000  
 C -9.389852000 -1.958646000 -10.753121000  
 O -9.342077000 -1.688455000 -12.046140000  
 H -8.590713000 -2.166557000 -12.456346000  
 C -10.619386000 -1.426867000 -10.087015000  
 H -10.694774000 -0.352896000 -10.265189000  
 H -11.500716000 -1.889243000 -10.534165000  
 H -10.599553000 -1.629791000 -9.020944000

**F**

Co -5.441918000 -4.694042000 -8.423001000  
 C -6.100593000 -3.638920000 -6.624915000  
 C -5.027518000 -4.479509000 -6.280699000  
 C -3.879021000 -4.103720000 -7.085208000  
 C -4.248495000 -2.982123000 -7.875541000  
 C -5.641173000 -2.740938000 -7.667264000

|   |               |               |               |          |               |              |              |
|---|---------------|---------------|---------------|----------|---------------|--------------|--------------|
| C | -7.144923000  | -4.366201000  | -10.956956000 | C        | -7.575244000  | -9.359801000 | -8.780139000 |
| C | -7.456925000  | -3.588472000  | -5.996459000  | H        | -7.413581000  | -6.585878000 | -6.814750000 |
| H | -7.669860000  | -4.478373000  | -5.405319000  | H        | -6.967824000  | -9.946569000 | -9.455723000 |
| H | -8.246985000  | -3.473818000  | -6.739571000  | C        | -7.049208000  | -8.204185000 | -8.185841000 |
| H | -7.520654000  | -2.729686000  | -5.321599000  | H        | -10.664064000 | -9.311882000 | -7.389020000 |
| C | -5.003799000  | -5.528244000  | -5.214855000  | C        | -5.670745000  | -7.840995000 | -8.469121000 |
| H | -4.464178000  | -6.421649000  | -5.530392000  | N        | -5.079310000  | -6.686448000 | -8.430744000 |
| H | -6.003796000  | -5.826823000  | -4.904276000  | O        | -3.706326000  | -6.956603000 | -8.703613000 |
| H | -4.490270000  | -5.143071000  | -4.328893000  | O        | -4.822155000  | -8.840845000 | -8.807328000 |
| C | -2.494515000  | -4.646234000  | -6.921790000  | C        | -3.564577000  | -8.282941000 | -8.972307000 |
| H | -1.917539000  | -4.576310000  | -7.842704000  | O        | -2.576393000  | -8.850060000 | -9.269763000 |
| H | -2.496160000  | -5.689028000  | -6.610408000  |          |               |              |              |
| H | -1.959907000  | -4.075660000  | -6.155480000  | <b>G</b> |               |              |              |
| C | -3.330538000  | -2.142687000  | -8.699945000  | Co       | -0.870107000  | -0.506396000 | 0.000792000  |
| H | -3.834144000  | -1.704567000  | -9.559303000  | C        | -2.004271000  | -1.494365000 | -1.593560000 |
| H | -2.474393000  | -2.706111000  | -9.064170000  | C        | -1.951897000  | -2.372496000 | -0.478901000 |
| H | -2.949840000  | -1.322979000  | -8.081700000  | C        | -2.547934000  | -1.700523000 | 0.635198000  |
| C | -6.424722000  | -1.599696000  | -8.231335000  | C        | -3.063481000  | -0.431370000 | 0.170610000  |
| H | -7.483700000  | -1.839789000  | -8.314349000  | C        | -2.710403000  | -0.294078000 | -1.189993000 |
| H | -6.062888000  | -1.312280000  | -9.218153000  | C        | 0.341872000   | 2.283382000  | -0.476414000 |
| H | -6.332737000  | -0.723310000  | -7.581806000  | C        | -1.544513000  | -1.786974000 | -2.983550000 |
| C | -3.659653000  | -4.720767000  | -10.896182000 | H        | -0.780647000  | -2.562087000 | -3.006653000 |
| C | -4.850435000  | -4.559091000  | -10.253130000 | H        | -1.147299000  | -0.898842000 | -3.475092000 |
| N | -5.822015000  | -4.378331000  | -11.280994000 | H        | -2.389618000  | -2.137211000 | -3.584777000 |
| C | -5.192981000  | -4.474253000  | -12.543729000 | C        | -1.367153000  | -3.741597000 | -0.425349000 |
| C | -3.873181000  | -4.674001000  | -12.317467000 | H        | -0.611833000  | -3.806013000 | 0.360256000  |
| H | -2.708221000  | -4.895504000  | -10.422055000 | H        | -0.903621000  | -4.025869000 | -1.368068000 |
| H | -5.739305000  | -4.442942000  | -13.465542000 | H        | -2.147143000  | -4.473819000 | -0.200944000 |
| H | -3.123085000  | -4.798065000  | -13.082749000 | C        | -2.756455000  | -2.296122000 | 1.986905000  |
| S | -7.536886000  | -4.779894000  | -9.319754000  | H        | -2.906352000  | -1.534727000 | 2.750115000  |
| N | -8.101075000  | -4.052336000  | -11.833147000 | H        | -1.914307000  | -2.919197000 | 2.284340000  |
| C | -7.889286000  | -3.232052000  | -13.034974000 | H        | -3.651114000  | -2.927804000 | 1.976379000  |
| H | -7.900439000  | -3.841190000  | -13.940822000 | C        | -3.939164000  | 0.486233000  | 0.953870000  |
| H | -6.953154000  | -2.686902000  | -12.970023000 | H        | -3.886378000  | 1.510901000  | 0.590574000  |
| H | -8.705097000  | -2.511754000  | -13.092567000 | H        | -3.684922000  | 0.492041000  | 2.011328000  |
| C | -9.511904000  | -4.296125000  | -11.510019000 | H        | -4.978054000  | 0.152697000  | 0.862004000  |
| H | -9.613187000  | -5.198184000  | -10.913193000 | C        | -3.118851000  | 0.815085000  | -2.102059000 |
| H | -10.054787000 | -4.427893000  | -12.444520000 | H        | -2.375032000  | 1.000008000  | -2.875514000 |
| H | -9.939228000  | -3.452836000  | -10.961839000 | H        | -3.283575000  | 1.744919000  | -1.558992000 |
| C | -9.652142000  | -9.000343000  | -7.615040000  | H        | -4.058214000  | 0.556657000  | -2.601119000 |
| C | -9.124990000  | -7.861464000  | -7.010539000  | C        | -0.960247000  | 1.097087000  | 2.551846000  |
| C | -8.877215000  | -9.746247000  | -8.498657000  | C        | -0.740908000  | 0.973651000  | 1.218085000  |
| H | -9.724165000  | -7.292514000  | -6.311539000  | N        | -0.148296000  | 2.193578000  | 0.787261000  |
| H | -9.284083000  | -10.635473000 | -8.962068000  | C        | 0.006307000   | 3.044022000  | 1.908185000  |
| C | -7.828939000  | -7.460395000  | -7.293244000  | C        | -0.495307000  | 2.387938000  | 2.980028000  |

|          |              |              |              |   |               |              |               |
|----------|--------------|--------------|--------------|---|---------------|--------------|---------------|
| H        | -1.341773000 | 0.329515000  | 3.202950000  | H | -3.757872000  | -3.547730000 | -6.320556000  |
| H        | 0.488718000  | 3.998560000  | 1.846543000  | H | -3.280628000  | -2.075654000 | -7.161865000  |
| H        | -0.509764000 | 2.767048000  | 3.989588000  | C | -5.289908000  | -2.055426000 | -9.939970000  |
| S        | 0.293277000  | 0.818282000  | -1.410147000 | H | -5.986972000  | -2.231011000 | -10.758175000 |
| N        | 0.831275000  | 3.403040000  | -1.004516000 | H | -4.457893000  | -2.750168000 | -10.035920000 |
| C        | 0.514862000  | 4.757539000  | -0.526347000 | H | -4.898467000  | -1.039510000 | -10.055740000 |
| H        | 1.326798000  | 5.166032000  | 0.078078000  | C | -8.325417000  | -1.326681000 | -9.291383000  |
| H        | -0.409135000 | 4.759198000  | 0.043442000  | H | -9.351019000  | -1.518772000 | -8.977298000  |
| H        | 0.379855000  | 5.392705000  | -1.400743000 | H | -8.193784000  | -1.733429000 | -10.293362000 |
| C        | 1.570154000  | 3.362577000  | -2.274372000 | H | -8.203960000  | -0.240777000 | -9.357906000  |
| H        | 2.135105000  | 2.437718000  | -2.355063000 | C | -9.929871000  | -4.867416000 | -8.954770000  |
| H        | 2.266390000  | 4.199096000  | -2.286391000 | S | -9.047987000  | -4.765420000 | -7.479161000  |
| H        | 0.889680000  | 3.448535000  | -3.124855000 | N | -6.956868000  | -4.808769000 | -9.542229000  |
| C        | 5.372230000  | -1.475581000 | -0.664533000 | N | -11.263155000 | -5.105979000 | -8.860103000  |
| C        | 4.219301000  | -1.851613000 | -1.349780000 | C | -11.795325000 | -5.724228000 | -7.639965000  |
| C        | 5.288197000  | -1.009150000 | 0.645499000  | H | -11.924628000 | -4.994229000 | -6.835761000  |
| H        | 4.289618000  | -2.227015000 | -2.362892000 | H | -12.764062000 | -6.155753000 | -7.889012000  |
| H        | 6.186578000  | -0.724562000 | 1.178366000  | H | -11.137088000 | -6.517815000 | -7.297646000  |
| C        | 2.981392000  | -1.755588000 | -0.728453000 | C | -12.287450000 | -4.333277000 | -9.589780000  |
| C        | 4.053453000  | -0.918070000 | 1.272965000  | H | -11.846722000 | -3.498465000 | -10.124806000 |
| H        | 2.086727000  | -2.063604000 | -1.254856000 | H | -12.983139000 | -3.929219000 | -8.852702000  |
| H        | 3.970866000  | -0.570834000 | 2.294830000  | C | -5.836770000  | -5.539735000 | -9.867109000  |
| C        | 2.893668000  | -1.286436000 | 0.585208000  | O | -4.775270000  | -5.374416000 | -9.263653000  |
| H        | 6.337529000  | -1.554410000 | -1.149019000 | C | -4.766808000  | -7.914159000 | -12.604963000 |
| C        | 1.599169000  | -1.180050000 | 1.296812000  | C | -4.784163000  | -6.864311000 | -11.694288000 |
| N        | 0.421676000  | -1.423635000 | 0.665339000  | C | -5.863197000  | -8.764581000 | -12.710733000 |
| O        | 1.481083000  | -0.980170000 | 2.508646000  | H | -3.922641000  | -6.218453000 | -11.585012000 |
| <b>H</b> |              |              |              | H | -5.846707000  | -9.588256000 | -13.413511000 |
| Co       | -6.989022000 | -3.885019000 | -7.837915000 | C | -6.978936000  | -8.557531000 | -11.903835000 |
| C        | -7.518944000 | -2.003955000 | -6.895241000 | H | -7.828920000  | -9.225337000 | -11.973053000 |
| C        | -6.311606000 | -2.464581000 | -6.336876000 | C | -7.006854000  | -7.493319000 | -11.010650000 |
| C        | -5.335456000 | -2.581918000 | -7.404664000 | H | -7.877601000  | -7.340606000 | -10.386139000 |
| C        | -5.953220000 | -2.179677000 | -8.610563000 | H | -3.893795000  | -8.074721000 | -13.225246000 |
| C        | -7.335556000 | -1.895990000 | -8.326504000 | C | -5.910922000  | -6.632813000 | -10.902191000 |
| C        | -8.763584000 | -1.645207000 | -6.153359000 | C | -7.821164000  | -4.399516000 | -11.820929000 |
| H        | -8.856094000 | -2.192357000 | -5.216279000 | C | -7.938257000  | -4.595417000 | -10.473457000 |
| H        | -9.658586000 | -1.835607000 | -6.742937000 | N | -9.350786000  | -4.712210000 | -10.186058000 |
| H        | -8.746236000 | -0.577472000 | -5.912809000 | C | -10.022951000 | -4.697705000 | -11.437088000 |
| C        | -6.031735000 | -2.732025000 | -4.894531000 | C | -9.113913000  | -4.495028000 | -12.415920000 |
| H        | -5.483391000 | -3.664661000 | -4.764761000 | H | -6.885576000  | -4.289769000 | -12.341711000 |
| H        | -6.945798000 | -2.791270000 | -4.305932000 | H | -11.079705000 | -4.833131000 | -11.515911000 |
| H        | -5.419078000 | -1.928373000 | -4.475439000 | H | -9.340866000  | -4.427440000 | -13.467583000 |
| C        | -3.905579000 | -2.971723000 | -7.232551000 | H | -12.848971000 | -4.962155000 | -10.282992000 |
| H        | -3.560240000 | -3.572213000 | -8.071792000 | O | -6.092182000  | -5.356926000 | -6.727945000  |
|          |              |              |              | C | -5.857349000  | -6.550128000 | -6.833630000  |



O -6.624718000 -7.306932000 -7.614805000  
H -6.296593000 -8.215910000 -7.662974000  
C -4.713366000 -7.207916000 -6.122077000  
H -4.355890000 -6.568141000 -5.320440000  
H -4.991570000 -8.183380000 -5.720214000  
H -3.904575000 -7.345693000 -6.845395000

**I**

Co -6.155603000 -3.421197000 -7.884827000  
C -6.932031000 -1.888980000 -6.593455000  
C -6.130763000 -2.762948000 -5.824240000  
C -4.819046000 -2.790790000 -6.414993000  
C -4.790657000 -1.802020000 -7.466326000  
C -6.101946000 -1.300557000 -7.630149000  
C -5.177069000 -5.409463000 -10.453905000  
C -8.352461000 -1.515937000 -6.322139000  
H -8.899051000 -2.320450000 -5.835398000  
H -8.882066000 -1.239836000 -7.233627000  
H -8.380009000 -0.643589000 -5.661355000  
C -6.550121000 -3.589613000 -4.661493000  
H -6.475701000 -4.651627000 -4.908258000  
H -7.572455000 -3.374527000 -4.356551000  
H -5.892825000 -3.398731000 -3.809682000  
C -3.662566000 -3.573586000 -5.887093000  
H -2.884172000 -3.704688000 -6.637697000  
H -3.979776000 -4.561139000 -5.553126000  
H -3.214630000 -3.056933000 -5.032188000  
C -3.575238000 -1.363243000 -8.212395000  
H -3.810597000 -0.997495000 -9.210718000  
H -2.835327000 -2.157048000 -8.301447000  
H -3.104535000 -0.542386000 -7.661872000  
C -6.546325000 -0.257007000 -8.603461000  
H -7.546857000 -0.461395000 -8.984560000  
H -5.873419000 -0.187084000 -9.456716000  
H -6.573925000 0.725249000 -8.121922000  
C -8.200800000 -7.091432000 -9.533647000  
C -7.037607000 -6.480604000 -9.157665000  
N -6.431787000 -5.995514000 -10.325388000  
C -7.255310000 -6.298649000 -11.417859000  
C -8.346928000 -6.960971000 -10.949009000  
H -8.861199000 -7.609066000 -8.857627000  
H -6.982732000 -5.987556000 -12.410770000  
H -9.165580000 -7.322719000 -11.550491000  
S -4.640406000 -4.113532000 -9.478577000  
N -4.389315000 -5.884414000 -11.422385000

C -4.481628000 -7.261854000 -11.941939000  
H -4.741175000 -7.255048000 -13.001052000  
H -5.218063000 -7.835092000 -11.390849000  
H -3.503475000 -7.729323000 -11.820490000  
C -3.175576000 -5.169317000 -11.827512000  
H -3.361542000 -4.098324000 -11.853636000  
H -2.896013000 -5.513832000 -12.821145000  
H -2.356026000 -5.369900000 -11.133276000  
C -4.733229000 -7.760803000 -3.262983000  
C -6.101968000 -7.733943000 -3.515060000  
C -3.843901000 -7.671542000 -4.329932000  
H -6.805130000 -7.820042000 -2.695122000  
H -2.776134000 -7.710387000 -4.149210000  
C -6.578879000 -7.611010000 -4.815388000  
C -4.314022000 -7.548579000 -5.633139000  
H -7.644256000 -7.611993000 -5.010910000  
H -3.621530000 -7.504604000 -6.464934000  
C -5.688718000 -7.508376000 -5.890204000  
H -4.364924000 -7.868482000 -2.250725000  
N -6.163287000 -7.470441000 -7.216170000  
C -6.466634000 -6.362614000 -7.781764000  
O -6.423982000 -5.182980000 -7.213697000  
O -7.744482000 -3.385264000 -9.155337000  
C -8.911890000 -3.733408000 -9.047138000  
O -9.357326000 -4.188905000 -7.880106000  
H -10.279975000 -4.475358000 -7.937018000  
C -9.885629000 -3.632696000 -10.183622000  
H -9.391887000 -3.221005000 -11.058465000  
H -10.274584000 -4.623685000 -10.425225000  
H -10.725981000 -2.993227000 -9.902264000

**J**

Co -6.299185000 -3.800877000 -8.053090000  
C -7.293429000 -2.430761000 -6.744460000  
C -6.410362000 -3.231403000 -5.983395000  
C -5.087207000 -3.070740000 -6.529718000  
C -5.155362000 -2.044894000 -7.539625000  
C -6.516995000 -1.705345000 -7.732249000  
C -4.915481000 -5.508340000 -10.754260000  
C -8.759875000 -2.262771000 -6.519316000  
H -9.204910000 -3.144697000 -6.064366000  
H -9.290413000 -2.048079000 -7.446633000  
H -8.931242000 -1.414861000 -5.848505000  
C -6.753271000 -4.147688000 -4.862179000  
H -6.517372000 -5.176718000 -5.141080000

H -7.806831000 -4.090478000 -4.595697000  
H -6.163885000 -3.890924000 -3.978258000  
C -3.863443000 -3.748254000 -6.006180000  
H -3.006956000 -3.599304000 -6.661644000  
H -4.028331000 -4.822196000 -5.907661000  
H -3.601105000 -3.349943000 -5.021208000  
C -3.987376000 -1.426613000 -8.231598000  
H -4.241685000 -1.054140000 -9.222761000  
H -3.150204000 -2.115776000 -8.326639000  
H -3.642519000 -0.574342000 -7.637236000  
C -7.061098000 -0.687534000 -8.682270000  
H -8.025203000 -0.992786000 -9.089012000  
H -6.386706000 -0.515401000 -9.519796000  
H -7.208455000 0.269998000 -8.173369000  
C -7.369511000 -7.851646000 -9.623465000  
C -6.344653000 -6.991750000 -9.349996000  
N -5.907349000 -6.463781000 -10.568993000  
C -6.689498000 -7.004039000 -11.600359000  
C -7.588431000 -7.854994000 -11.037310000  
H -7.892476000 -8.442800000 -8.889796000  
H -6.542382000 -6.697913000 -12.620515000  
H -8.325029000 -8.431387000 -11.574139000  
S -4.737227000 -4.127202000 -9.756058000  
N -4.086837000 -5.695452000 -11.784442000  
C -3.777927000 -7.023947000 -12.346749000  
H -4.115907000 -7.089788000 -13.381687000  
H -4.238042000 -7.809100000 -11.758365000  
H -2.695629000 -7.153128000 -12.318145000  
C -3.192259000 -4.627909000 -12.240123000  
H -3.701416000 -3.668235000 -12.200168000  
H -2.904136000 -4.844570000 -13.267020000  
H -2.295625000 -4.579885000 -11.617668000  
C -2.516398000 -10.340517000 -9.133180000  
C -3.820273000 -10.536727000 -8.689237000  
C -1.951771000 -9.070367000 -9.046383000  
H -4.262717000 -11.524797000 -8.729532000  
H -0.927777000 -8.910411000 -9.362910000  
C -4.562217000 -9.476338000 -8.180178000  
C -2.682794000 -8.008732000 -8.527173000  
H -5.565677000 -9.643309000 -7.810931000  
H -2.235048000 -7.027946000 -8.423035000  
C -4.007247000 -8.193130000 -8.106932000  
H -1.939853000 -11.170694000 -9.520763000  
N -4.687425000 -7.104613000 -7.534701000  
C -5.732411000 -6.577708000 -8.044463000

O -6.380874000 -5.607672000 -7.441241000  
O -7.869880000 -4.009246000 -9.340197000  
C -8.938970000 -4.597837000 -9.264276000  
O -9.345169000 -5.082785000 -8.095404000  
H -10.185675000 -5.554865000 -8.177949000  
C -9.827782000 -4.790397000 -10.457629000  
H -9.766513000 -5.834727000 -10.773902000  
H -10.867811000 -4.560927000 -10.218239000  
H -9.489966000 -4.159213000 -11.274417000

### B-TS

Co -5.372377000 -4.126903000 -7.944069000  
C -5.840753000 -2.593333000 -6.491697000  
C -4.968782000 -3.594502000 -5.949896000  
C -3.734341000 -3.537189000 -6.685560000  
C -3.879772000 -2.588791000 -7.726976000  
C -5.206017000 -2.017655000 -7.626699000  
C -7.977174000 -4.568963000 -9.554405000  
C -7.160908000 -2.186934000 -5.926571000  
H -7.662085000 -3.006854000 -5.415104000  
H -7.833382000 -1.797978000 -6.689188000  
H -7.000415000 -1.391230000 -5.191698000  
C -5.216797000 -4.446475000 -4.747113000  
H -6.280399000 -4.554359000 -4.537993000  
H -4.750927000 -4.004017000 -3.861229000  
H -4.797422000 -5.443594000 -4.879235000  
C -2.518411000 -4.343726000 -6.381176000  
H -2.778276000 -5.375354000 -6.147940000  
H -2.008510000 -3.921988000 -5.509363000  
H -1.811200000 -4.345451000 -7.208980000  
C -2.791205000 -2.138494000 -8.648370000  
H -3.179978000 -1.573783000 -9.492548000  
H -2.204191000 -2.972813000 -9.033275000  
H -2.102734000 -1.482830000 -8.106477000  
C -5.735346000 -0.880005000 -8.439876000  
H -6.823451000 -0.895454000 -8.496636000  
H -5.347972000 -0.892104000 -9.456815000  
H -5.446477000 0.073162000 -7.986267000  
C -4.983781000 -3.330459000 -10.988916000  
C -5.628472000 -4.083665000 -10.014656000  
N -7.013373000 -3.987313000 -10.357961000  
C -7.171961000 -3.165021000 -11.455261000  
C -5.930992000 -2.754894000 -11.867104000  
H -3.913174000 -3.244292000 -11.081407000  
H -8.142158000 -2.906663000 -11.841125000

|   |               |              |               |
|---|---------------|--------------|---------------|
| H | -5.734072000  | -2.113039000 | -12.710910000 |
| S | -7.536874000  | -4.877952000 | -7.927595000  |
| N | -9.172093000  | -4.889952000 | -10.046092000 |
| C | -9.435822000  | -5.164604000 | -11.469107000 |
| H | -8.508411000  | -5.248079000 | -12.025884000 |
| H | -10.064780000 | -4.388113000 | -11.907752000 |
| H | -9.963134000  | -6.116450000 | -11.532360000 |
| C | -10.254114000 | -5.296897000 | -9.140492000  |
| H | -10.174861000 | -6.358653000 | -8.895251000  |
| H | -11.202985000 | -5.112561000 | -9.640660000  |
| H | -10.213751000 | -4.716026000 | -8.222739000  |
| O | -4.724359000  | -5.959120000 | -7.728570000  |
| C | -4.626852000  | -6.826759000 | -8.654293000  |
| O | -4.915475000  | -6.594923000 | -9.859101000  |
| C | -4.121244000  | -8.196830000 | -8.285674000  |
| H | -3.126877000  | -8.332457000 | -8.716171000  |
| H | -4.069622000  | -8.319738000 | -7.207014000  |
| H | -4.770187000  | -8.955062000 | -8.723544000  |
| H | -5.241594000  | -5.292659000 | -9.919500000  |

**D-TS**

|    |              |              |              |
|----|--------------|--------------|--------------|
| Co | -7.270181000 | -3.903429000 | -8.196655000 |
| C  | -7.425274000 | -2.183585000 | -6.929905000 |
| C  | -7.876827000 | -3.365251000 | -6.215563000 |
| C  | -6.789189000 | -4.266258000 | -6.118945000 |
| C  | -5.676045000 | -3.693376000 | -6.822814000 |
| C  | -6.063978000 | -2.376896000 | -7.258100000 |
| C  | -8.228338000 | -0.937177000 | -7.132874000 |
| H  | -9.277007000 | -1.154634000 | -7.337360000 |
| H  | -7.842059000 | -0.335594000 | -7.954433000 |
| H  | -8.197467000 | -0.318389000 | -6.230784000 |
| C  | -9.207797000 | -3.522082000 | -5.553802000 |
| H  | -9.498429000 | -4.568481000 | -5.466935000 |
| H  | -9.996097000 | -2.996916000 | -6.090462000 |
| H  | -9.166061000 | -3.107856000 | -4.541273000 |
| C  | -6.789650000 | -5.540919000 | -5.338923000 |
| H  | -7.747464000 | -6.056783000 | -5.395671000 |
| H  | -6.599159000 | -5.318860000 | -4.284262000 |
| H  | -6.016204000 | -6.229452000 | -5.671609000 |
| C  | -4.289232000 | -4.248019000 | -6.906772000 |
| H  | -3.829923000 | -4.046522000 | -7.874928000 |
| H  | -4.269274000 | -5.323965000 | -6.740471000 |
| H  | -3.650310000 | -3.792557000 | -6.143887000 |
| C  | -5.147266000 | -1.381660000 | -7.888174000 |
| H  | -5.682276000 | -0.636576000 | -8.472934000 |

|   |               |              |               |
|---|---------------|--------------|---------------|
| H | -4.410650000  | -1.853320000 | -8.536650000  |
| H | -4.599410000  | -0.854695000 | -7.100222000  |
| C | -9.582082000  | -5.463198000 | -9.527394000  |
| S | -9.413829000  | -3.827725000 | -9.025667000  |
| N | -10.633733000 | -5.882434000 | -10.229625000 |
| C | -11.813747000 | -5.017984000 | -10.363722000 |
| H | -11.675787000 | -4.296197000 | -11.172344000 |
| H | -12.671707000 | -5.649636000 | -10.585832000 |
| H | -11.995689000 | -4.483015000 | -9.435546000  |
| C | -10.614773000 | -7.030259000 | -11.152965000 |
| H | -9.596138000  | -7.331571000 | -11.375900000 |
| H | -11.087636000 | -6.713645000 | -12.082091000 |
| C | -6.540833000  | -6.906424000 | -8.425044000  |
| C | -7.301708000  | -5.792497000 | -8.751281000  |
| N | -8.552160000  | -6.322063000 | -9.192315000  |
| C | -8.526449000  | -7.703870000 | -9.106850000  |
| C | -7.293726000  | -8.081899000 | -8.643839000  |
| H | -5.515271000  | -6.873279000 | -8.095261000  |
| H | -9.380288000  | -8.312752000 | -9.339590000  |
| H | -6.978069000  | -9.099138000 | -8.475562000  |
| H | -11.176550000 | -7.874093000 | -10.748394000 |
| C | -6.475066000  | -4.964815000 | -10.441241000 |
| O | -6.328241000  | -5.739930000 | -11.314712000 |
| N | -6.449623000  | -3.772164000 | -9.986750000  |
| C | -6.060189000  | -2.689370000 | -10.853879000 |
| C | -4.842247000  | -2.729445000 | -11.529846000 |
| C | -6.909666000  | -1.595847000 | -10.999868000 |
| H | -4.185358000  | -3.582627000 | -11.415340000 |
| H | -7.860928000  | -1.583407000 | -10.484786000 |
| C | -4.480397000  | -1.671892000 | -12.357446000 |
| C | -6.536557000  | -0.540449000 | -11.824817000 |
| H | -3.535658000  | -1.707090000 | -12.885010000 |
| H | -7.201072000  | 0.306313000  | -11.943276000 |
| C | -5.322293000  | -0.574225000 | -12.504028000 |
| H | -5.036090000  | 0.247858000  | -13.147227000 |

**(Z) D'-TS**

|    |              |              |              |
|----|--------------|--------------|--------------|
| Co | -5.404771000 | -3.943654000 | -7.691771000 |
| C  | -5.669386000 | -2.128911000 | -6.593604000 |
| C  | -4.730750000 | -2.947212000 | -5.933927000 |
| C  | -3.633537000 | -3.200299000 | -6.844863000 |
| C  | -3.880086000 | -2.465759000 | -8.044310000 |
| C  | -5.162561000 | -1.859886000 | -7.931037000 |
| C  | -7.354478000 | -4.824367000 | -9.938245000 |
| C  | -6.931637000 | -1.565668000 | -6.022822000 |

|   |               |               |               |
|---|---------------|---------------|---------------|
| H | -7.309953000  | -2.166423000  | -5.197090000  |
| H | -7.719363000  | -1.486488000  | -6.771982000  |
| H | -6.747014000  | -0.557423000  | -5.639650000  |
| C | -4.824665000  | -3.505064000  | -4.552105000  |
| H | -4.614139000  | -4.575304000  | -4.542678000  |
| H | -5.809718000  | -3.349871000  | -4.116050000  |
| H | -4.091937000  | -3.018476000  | -3.901794000  |
| C | -2.406966000  | -3.980370000  | -6.496209000  |
| H | -1.817543000  | -4.230825000  | -7.377395000  |
| H | -2.658123000  | -4.906895000  | -5.978835000  |
| H | -1.762371000  | -3.398090000  | -5.830817000  |
| C | -2.949830000  | -2.321070000  | -9.204392000  |
| H | -3.482957000  | -2.245771000  | -10.151338000 |
| H | -2.246723000  | -3.148898000  | -9.275069000  |
| H | -2.362956000  | -1.404947000  | -9.086022000  |
| C | -5.795460000  | -0.940642000  | -8.926064000  |
| H | -6.882843000  | -0.996518000  | -8.893869000  |
| H | -5.476182000  | -1.163873000  | -9.943810000  |
| H | -5.512845000  | 0.095475000   | -8.714725000  |
| C | -3.902760000  | -5.659387000  | -9.776695000  |
| C | -5.071000000  | -5.138099000  | -9.206126000  |
| N | -6.066668000  | -5.250855000  | -10.234739000 |
| C | -5.519124000  | -5.932484000  | -11.299351000 |
| C | -4.186355000  | -6.165241000  | -11.051697000 |
| H | -2.962394000  | -5.746188000  | -9.255849000  |
| H | -6.081128000  | -6.221645000  | -12.164641000 |
| H | -3.513585000  | -6.679588000  | -11.718866000 |
| S | -7.570638000  | -4.077009000  | -8.398251000  |
| N | -8.384638000  | -4.970106000  | -10.770240000 |
| C | -8.286737000  | -5.258308000  | -12.208991000 |
| H | -8.228584000  | -6.331332000  | -12.401414000 |
| H | -7.436439000  | -4.745451000  | -12.652389000 |
| H | -9.185511000  | -4.874785000  | -12.684023000 |
| C | -9.743411000  | -4.665846000  | -10.287559000 |
| H | -9.866987000  | -5.018737000  | -9.267179000  |
| H | -10.452195000 | -5.182904000  | -10.929316000 |
| H | -9.935947000  | -3.591237000  | -10.320416000 |
| C | -7.444791000  | -10.856447000 | -6.441193000  |
| C | -7.213612000  | -9.697626000  | -5.705454000  |
| C | -7.119064000  | -10.890061000 | -7.794007000  |
| H | -7.461786000  | -9.667115000  | -4.651686000  |
| H | -7.291540000  | -11.789432000 | -8.371925000  |
| C | -6.661518000  | -8.574585000  | -6.310026000  |
| C | -6.568842000  | -9.772522000  | -8.407921000  |
| H | -6.479194000  | -7.679004000  | -5.731391000  |

|   |              |               |              |
|---|--------------|---------------|--------------|
| H | -6.305513000 | -9.786378000  | -9.457667000 |
| C | -6.335217000 | -8.609581000  | -7.670684000 |
| H | -7.872653000 | -11.727930000 | -5.962358000 |
| N | -5.770693000 | -7.512030000  | -8.361831000 |
| C | -5.472147000 | -6.405667000  | -7.903430000 |
| O | -5.372560000 | -5.724132000  | -6.849010000 |

**(E) D'-TS**

|    |              |              |               |
|----|--------------|--------------|---------------|
| Co | -5.925368000 | -4.059056000 | -7.957290000  |
| C  | -5.487468000 | -2.426412000 | -6.660058000  |
| C  | -4.976841000 | -3.617823000 | -6.101379000  |
| C  | -4.038884000 | -4.190219000 | -7.039883000  |
| C  | -3.914376000 | -3.284872000 | -8.141629000  |
| C  | -4.847794000 | -2.232339000 | -7.952872000  |
| C  | -8.027261000 | -3.910449000 | -10.209391000 |
| C  | -6.443066000 | -1.471690000 | -6.018827000  |
| H  | -7.085443000 | -1.964269000 | -5.290400000  |
| H  | -7.080461000 | -0.977930000 | -6.751959000  |
| H  | -5.887532000 | -0.688933000 | -5.493239000  |
| C  | -5.351012000 | -4.237969000 | -4.796191000  |
| H  | -5.638276000 | -5.282937000 | -4.922411000  |
| H  | -6.178290000 | -3.716030000 | -4.319446000  |
| H  | -4.498365000 | -4.208450000 | -4.111867000  |
| C  | -3.234381000 | -5.425285000 | -6.789696000  |
| H  | -2.808887000 | -5.829545000 | -7.707498000  |
| H  | -3.836296000 | -6.204336000 | -6.321209000  |
| H  | -2.400867000 | -5.207018000 | -6.114977000  |
| C  | -2.937482000 | -3.380865000 | -9.267491000  |
| H  | -3.365280000 | -3.052631000 | -10.213980000 |
| H  | -2.556060000 | -4.391304000 | -9.397850000  |
| H  | -2.080705000 | -2.734148000 | -9.053705000  |
| C  | -5.009726000 | -1.032726000 | -8.830146000  |
| H  | -6.022057000 | -0.633455000 | -8.788660000  |
| H  | -4.778843000 | -1.258960000 | -9.870751000  |
| H  | -4.328814000 | -0.238310000 | -8.508355000  |
| C  | -5.024792000 | -5.786052000 | -10.366213000 |
| C  | -6.029093000 | -5.173043000 | -9.620686000  |
| N  | -6.961123000 | -4.702403000 | -10.596601000 |
| C  | -6.479189000 | -4.969054000 | -11.868943000 |
| C  | -5.296338000 | -5.644743000 | -11.747604000 |
| H  | -4.164901000 | -6.279966000 | -9.944352000  |
| H  | -6.991071000 | -4.644169000 | -12.756330000 |
| H  | -4.693616000 | -5.997832000 | -12.568782000 |
| S  | -7.931378000 | -3.194121000 | -8.652685000  |
| N  | -9.080771000 | -3.744737000 | -11.006302000 |

|   |               |               |               |
|---|---------------|---------------|---------------|
| C | -9.474152000  | -4.682932000  | -12.070348000 |
| H | -8.940599000  | -5.623456000  | -11.975431000 |
| H | -9.300923000  | -4.252152000  | -13.058264000 |
| H | -10.540635000 | -4.879513000  | -11.961791000 |
| C | -10.096261000 | -2.734859000  | -10.679726000 |
| H | -10.819772000 | -3.131177000  | -9.963427000  |
| H | -10.610531000 | -2.461524000  | -11.599054000 |
| H | -9.625060000  | -1.851580000  | -10.256930000 |
| C | -7.453165000  | -9.812429000  | -12.090291000 |
| C | -8.606602000  | -9.144540000  | -11.680526000 |
| C | -6.281777000  | -9.680423000  | -11.352464000 |
| H | -9.529496000  | -9.271540000  | -12.232890000 |
| H | -5.391351000  | -10.221251000 | -11.647911000 |
| C | -8.587072000  | -8.337179000  | -10.552692000 |
| C | -6.248631000  | -8.871679000  | -10.222536000 |
| H | -9.485586000  | -7.843881000  | -10.204176000 |
| H | -5.350641000  | -8.798395000  | -9.623782000  |
| C | -7.397976000  | -8.174925000  | -9.829432000  |
| H | -7.476981000  | -10.451732000 | -12.963334000 |
| N | -7.397303000  | -7.388509000  | -8.689529000  |
| C | -6.876967000  | -6.350098000  | -8.296787000  |
| O | -6.727033000  | -5.694007000  | -7.248676000  |

### F-TS

|   |              |              |              |
|---|--------------|--------------|--------------|
| C | -1.523375000 | -0.761638000 | -1.806899000 |
| C | -1.947514000 | -1.625009000 | -0.761261000 |
| C | -0.930753000 | -2.623369000 | -0.582844000 |
| C | -0.242583000 | -1.221385000 | -2.291038000 |
| C | 0.104343000  | -2.381921000 | -1.555370000 |
| C | -1.019372000 | -3.823814000 | 0.296885000  |
| H | -1.374902000 | -4.674569000 | -0.294711000 |
| H | -0.051697000 | -4.088740000 | 0.717553000  |
| H | -1.725137000 | -3.677804000 | 1.111718000  |
| C | -3.275896000 | -1.595840000 | -0.079702000 |
| H | -3.978703000 | -2.237365000 | -0.620334000 |
| H | -3.211890000 | -1.956763000 | 0.944593000  |
| H | -3.698955000 | -0.592421000 | -0.058319000 |
| C | -2.328778000 | 0.331664000  | -2.422342000 |
| H | -2.928694000 | -0.086624000 | -3.237752000 |
| H | -3.015975000 | 0.785667000  | -1.710455000 |
| H | -1.703761000 | 1.117171000  | -2.843073000 |
| C | 0.487667000  | -0.639005000 | -3.458188000 |
| H | 0.509299000  | 0.451033000  | -3.426236000 |
| H | 1.513251000  | -0.998659000 | -3.515078000 |
| H | -0.009253000 | -0.924733000 | -4.390378000 |

|    |              |              |              |
|----|--------------|--------------|--------------|
| C  | 1.302711000  | -3.246461000 | -1.748843000 |
| H  | 1.019195000  | -4.137423000 | -2.317920000 |
| H  | 2.089913000  | -2.738303000 | -2.302484000 |
| H  | 1.712100000  | -3.575409000 | -0.795027000 |
| Co | -0.073686000 | -0.710882000 | -0.157310000 |
| C  | 2.690253000  | -0.404644000 | 0.873958000  |
| C  | 2.556255000  | -2.313085000 | 2.482245000  |
| O  | 3.016104000  | -2.625195000 | 3.517736000  |
| O  | 3.274377000  | -0.854626000 | 1.913336000  |
| O  | 1.753254000  | -2.620270000 | 1.604412000  |
| N  | 1.614858000  | -0.910252000 | 0.334372000  |
| C  | 3.317161000  | 0.764596000  | 0.184997000  |
| C  | 3.884991000  | 1.763280000  | 0.981435000  |
| C  | 3.390829000  | 0.845539000  | -1.206354000 |
| C  | 4.513093000  | 2.843993000  | 0.377754000  |
| H  | 3.849542000  | 1.675816000  | 2.058852000  |
| C  | 4.031264000  | 1.925678000  | -1.800531000 |
| H  | 2.981787000  | 0.052164000  | -1.815710000 |
| C  | 4.585793000  | 2.928212000  | -1.010851000 |
| H  | 4.962706000  | 3.613235000  | 0.992726000  |
| H  | 4.110675000  | 1.978206000  | -2.878937000 |
| H  | 5.089156000  | 3.766479000  | -1.475797000 |
| C  | -0.917851000 | 1.929485000  | 1.201319000  |
| C  | -0.888715000 | -1.229613000 | 2.715765000  |
| C  | -0.758479000 | -0.427563000 | 1.625926000  |
| N  | -1.121819000 | 0.883613000  | 2.045091000  |
| C  | -1.441865000 | 0.852394000  | 3.423464000  |
| C  | -1.312564000 | -0.430025000 | 3.834201000  |
| H  | -0.657216000 | -2.279394000 | 2.755591000  |
| H  | -1.677825000 | 1.735627000  | 3.982145000  |
| H  | -1.473011000 | -0.779589000 | 4.841890000  |
| S  | -0.095307000 | 1.553039000  | -0.281381000 |
| N  | -1.308945000 | 3.175898000  | 1.459418000  |
| C  | -2.374180000 | 3.536511000  | 2.407776000  |
| H  | -1.961851000 | 3.905715000  | 3.348554000  |
| H  | -3.026362000 | 2.689412000  | 2.595872000  |
| H  | -2.965198000 | 4.330454000  | 1.953163000  |
| C  | -0.837439000 | 4.288468000  | 0.622949000  |
| H  | 0.177548000  | 4.103266000  | 0.281619000  |
| H  | -0.842990000 | 5.192414000  | 1.229240000  |
| H  | -1.490383000 | 4.430951000  | -0.241380000 |

### G-TS

|   |             |              |              |
|---|-------------|--------------|--------------|
| C | 2.942023000 | -3.158397000 | -7.855293000 |
| C | 1.893723000 | -3.826144000 | -7.175527000 |

|    |              |              |              |   |             |              |              |
|----|--------------|--------------|--------------|---|-------------|--------------|--------------|
| C  | 2.304668000  | -5.189944000 | -6.946453000 | C | 6.713347000 | -4.479050000 | -1.942245000 |
| C  | 4.010252000  | -4.109141000 | -8.069313000 | C | 4.562982000 | -5.187605000 | -0.318018000 |
| C  | 3.590625000  | -5.370331000 | -7.544093000 | H | 3.518113000 | -5.624148000 | -2.141987000 |
| C  | 1.491552000  | -6.272388000 | -6.314092000 | C | 6.829070000 | -4.391352000 | -0.562470000 |
| H  | 1.091039000  | -6.942265000 | -7.080631000 | H | 7.549858000 | -4.235918000 | -2.584842000 |
| H  | 2.093789000  | -6.876230000 | -5.634319000 | C | 5.754853000 | -4.747080000 | 0.250516000  |
| H  | 0.644518000  | -5.872478000 | -5.759122000 | H | 3.738310000 | -5.486368000 | 0.316646000  |
| C  | 0.556510000  | -3.250608000 | -6.843692000 | H | 7.759927000 | -4.061787000 | -0.118658000 |
| H  | -0.135530000 | -3.443325000 | -7.669568000 | H | 5.851835000 | -4.693460000 | 1.327747000  |
| H  | 0.129247000  | -3.693739000 | -5.946359000 | C | 4.484182000 | -1.436928000 | -4.331324000 |
| H  | 0.601453000  | -2.172627000 | -6.698027000 | S | 5.195163000 | -2.210961000 | -5.701410000 |
| C  | 2.913562000  | -1.755184000 | -8.368640000 | N | 4.955438000 | -0.272173000 | -3.886995000 |
| H  | 2.549632000  | -1.744376000 | -9.400660000 | C | 4.190666000 | 0.699717000  | -3.089903000 |
| H  | 2.249972000  | -1.121846000 | -7.781080000 | H | 3.122937000 | 0.564778000  | -3.233529000 |
| H  | 3.903387000  | -1.301113000 | -8.364566000 | H | 4.455148000 | 1.694830000  | -3.443235000 |
| C  | 5.271929000  | -3.854787000 | -8.828375000 | H | 4.439392000 | 0.632521000  | -2.029084000 |
| H  | 5.590777000  | -2.815729000 | -8.753472000 | C | 6.236391000 | 0.238419000  | -4.398981000 |
| H  | 6.087331000  | -4.487859000 | -8.480800000 | H | 6.932112000 | -0.580448000 | -4.560201000 |
| H  | 5.115094000  | -4.070981000 | -9.890034000 | H | 6.651361000 | 0.913393000  | -3.653193000 |
| C  | 4.354423000  | -6.650739000 | -7.615320000 | H | 6.093407000 | 0.779135000  | -5.337531000 |
| H  | 5.429394000  | -6.485179000 | -7.564339000 | C | 1.927508000 | -3.732069000 | -3.514321000 |
| H  | 4.080727000  | -7.326972000 | -6.807636000 | C | 2.907679000 | -3.258544000 | -4.347976000 |
| H  | 4.135922000  | -7.154763000 | -8.562135000 | N | 3.424949000 | -2.089372000 | -3.743486000 |
| Co | 3.715222000  | -3.909231000 | -5.983838000 | C | 2.741260000 | -1.870131000 | -2.531583000 |
| C  | 5.467263000  | -5.034558000 | -3.987014000 | C | 1.812403000 | -2.852332000 | -2.395179000 |
| O  | 6.450394000  | -5.327246000 | -4.678609000 | H | 1.363164000 | -4.636374000 | -3.668126000 |
| N  | 4.354721000  | -4.998375000 | -4.758308000 | H | 2.978194000 | -1.060985000 | -1.870908000 |
| C  | 5.509224000  | -4.903287000 | -2.517080000 | H | 1.132481000 | -2.951879000 | -1.564223000 |
| C  | 4.434380000  | -5.260434000 | -1.699086000 |   |             |              |              |

## References:

- (1) Basuli, S.; Sahu, S.; Saha, S.; Maji, M. S. *Adv. Synth. Catal.* **2021**, *363*, 4605–4611.
- (2) Liu, Y.-H.; Li, P.-X.; Yao, Q.-J.; Zhang, Z.-Z.; Huang, D.-Y.; Le, M. D.; Song, H.; Liu, L.; Shi, B.-F. *Org. Lett.* **2019**, *21*, 1895–1899.
- (3) Sheldrick, G. M. *Acta Cryst.* **2015**, *71A*, 3–8.
- (4) Frisch, M. J.; Trucks, G. W.; Schlegel, H. B.; Scuseria, G. E.; Robb, M. A.; Cheeseman, J. R.; Scalmani, G.; Barone, V.; Petersson, G. A.; Nakatsuji, H.; Li, X.; Caricato, M.; Marenich, A. V.; Bloino, J.; Janesko, B. G.; Gomperts, R.; Mennucci, B.; Hratchian, H. P.; Ortiz, J. V.; Izmaylov, A. F.; Sonnenberg, J. L.; Williams-Young, D.; Ding, F.; Lipparini, F.; Egidi, F.; Goings, J.; Peng, B.; Petrone, A.; Henderson, T.; Ranasinghe, D.; Zakrzewski, V. G.; Gao, J.; Rega, N.; Zheng, G.; Liang, W.; Hada, M.; Ehara, M.; Toyota, K.; Fukuda, R.; Hasegawa, J.; Ishida, M.; Nakajima, T.; Honda, Y.; Kitao, O.; Nakai, H.; Vreven, T.; Throssell, K.; Montgomery, J. A., Jr.; Peralta, J. E.; Ogliaro, F.; Bearpark, M. J.; Heyd, J. J.; Brothers, E. N.; Kudin, K. N.; Staroverov, V. N.; Keith, T. A.; Kobayashi, R.; Normand, J.; Raghavachari, K.; Rendell, A. P.; Burant, J. C.; Iyengar, S. S.; Tomasi, J.; Cossi, M.; Millam, J. M.; Klene, M.; Adamo, C.; Cammi, R.; Ochterski, J. W.; Martin, R. L.; Morokuma, K.; Farkas, O.; Foresman, J. B.; Fox, D. J. *Gaussian 16* (Revision B.01): Gaussian, Inc.: Wallingford CT (**2016**).
- (5) (a) Becke, A. D. *J. Chem. Phys.* **1993**, *98*, 1372–1377; (b) Lee, C.; Yang, W.; Parr, R. G. *Phys. Rev. B* **1988**, *37*, 785–789; (c) Becke, A. D. *Phys. Rev. A* **1988**, *38*, 3098–3100.
- (6) Marenich, A. V.; Cramer, C. J.; Truhlar, D. G. *J. Phys. Chem. B* **2009**, *113*, 6378–6396.
- (7) Zhurko, D. A.; Zhurko, G. A. *ChemCraft 1.5*; Plimus: San Diego, CA. Available at <http://www.chemcraftprog.com>.

# <sup>1</sup>H NMR and <sup>13</sup>C NMR Spectra of Compound **1b**

msh.ssh966  
msh / ssh / 966 - 1h - 500mhz

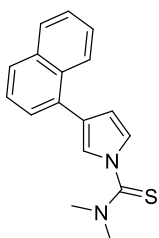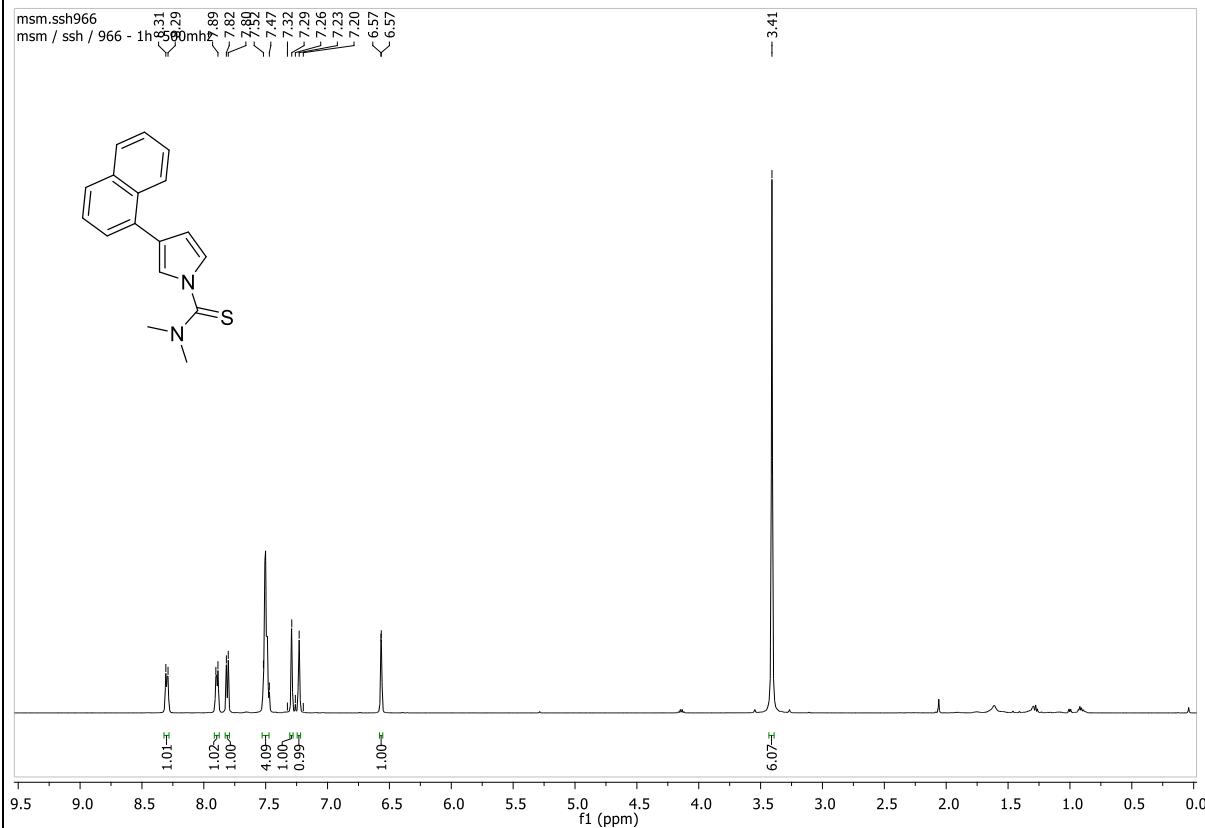

msh.ssh966  
msh / ssh / 966 - 13c - 500mhz

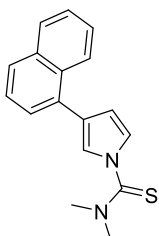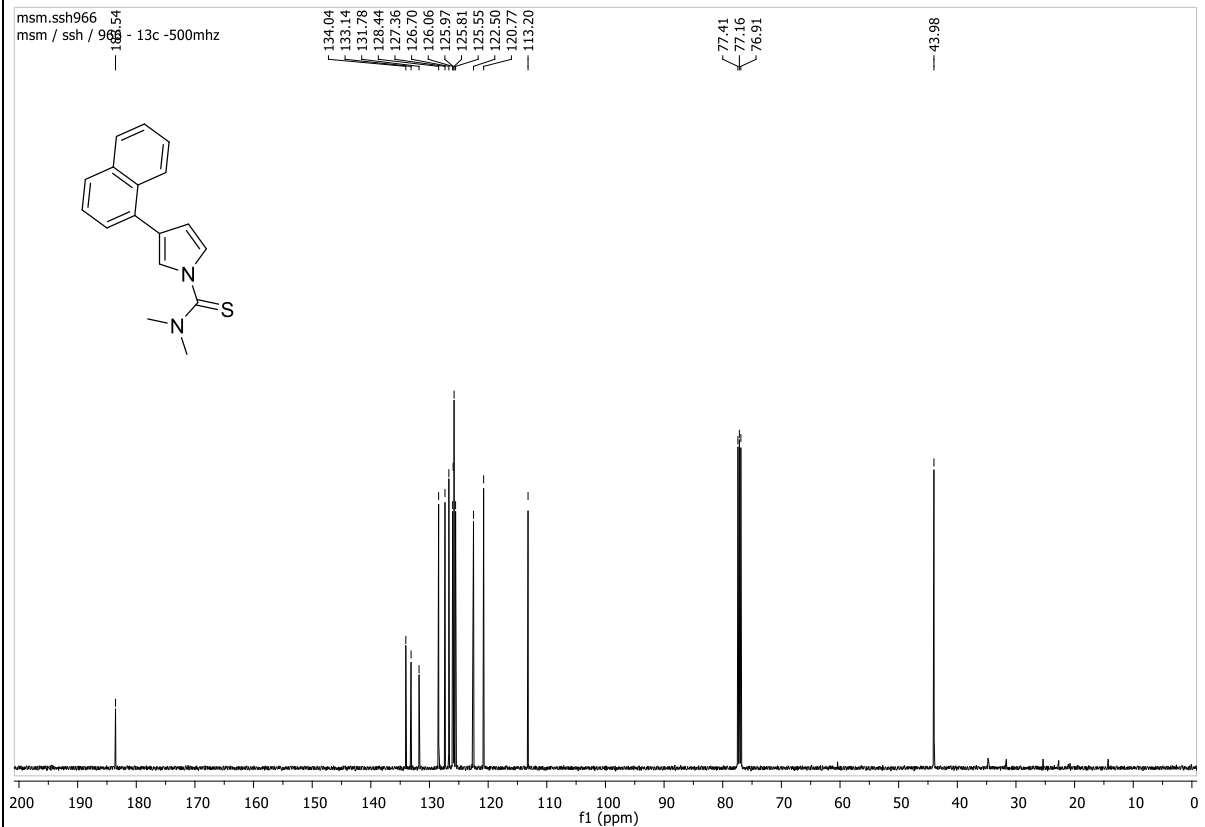



# <sup>1</sup>H NMR and <sup>13</sup>C NMR Spectra of Compound 1c

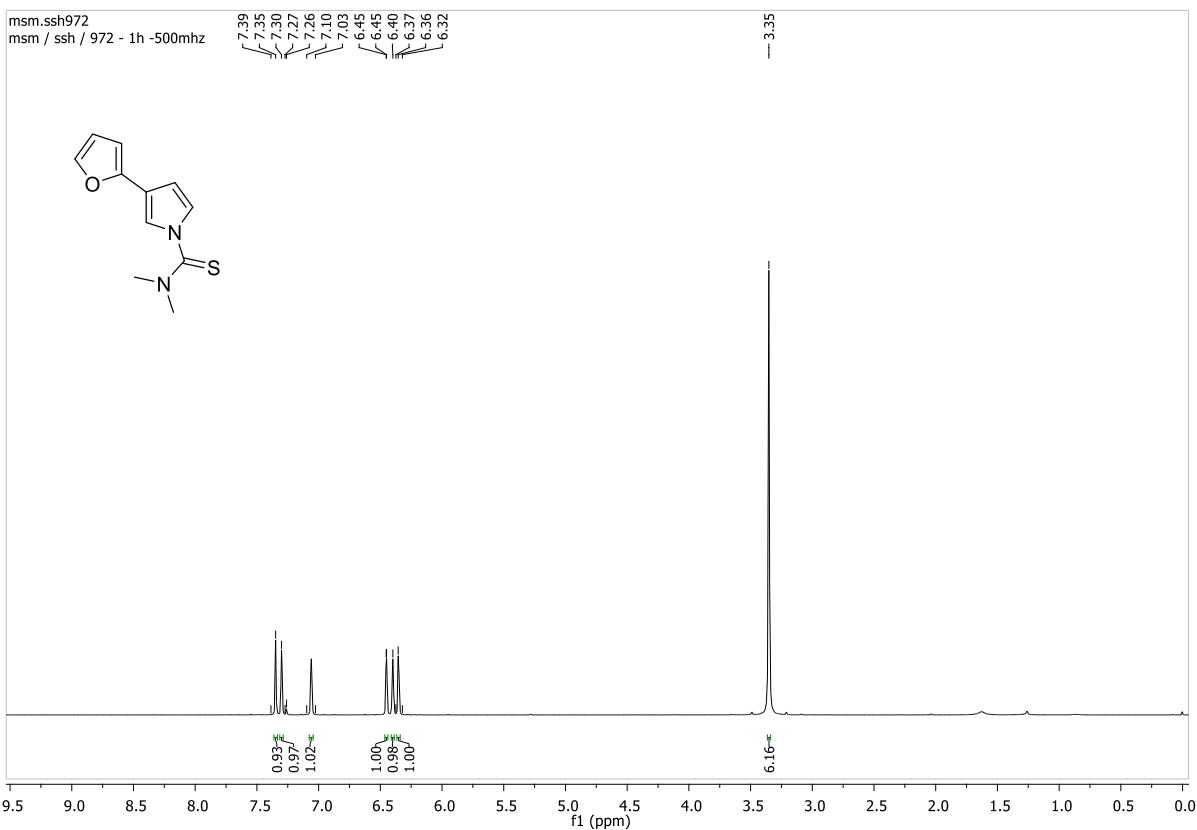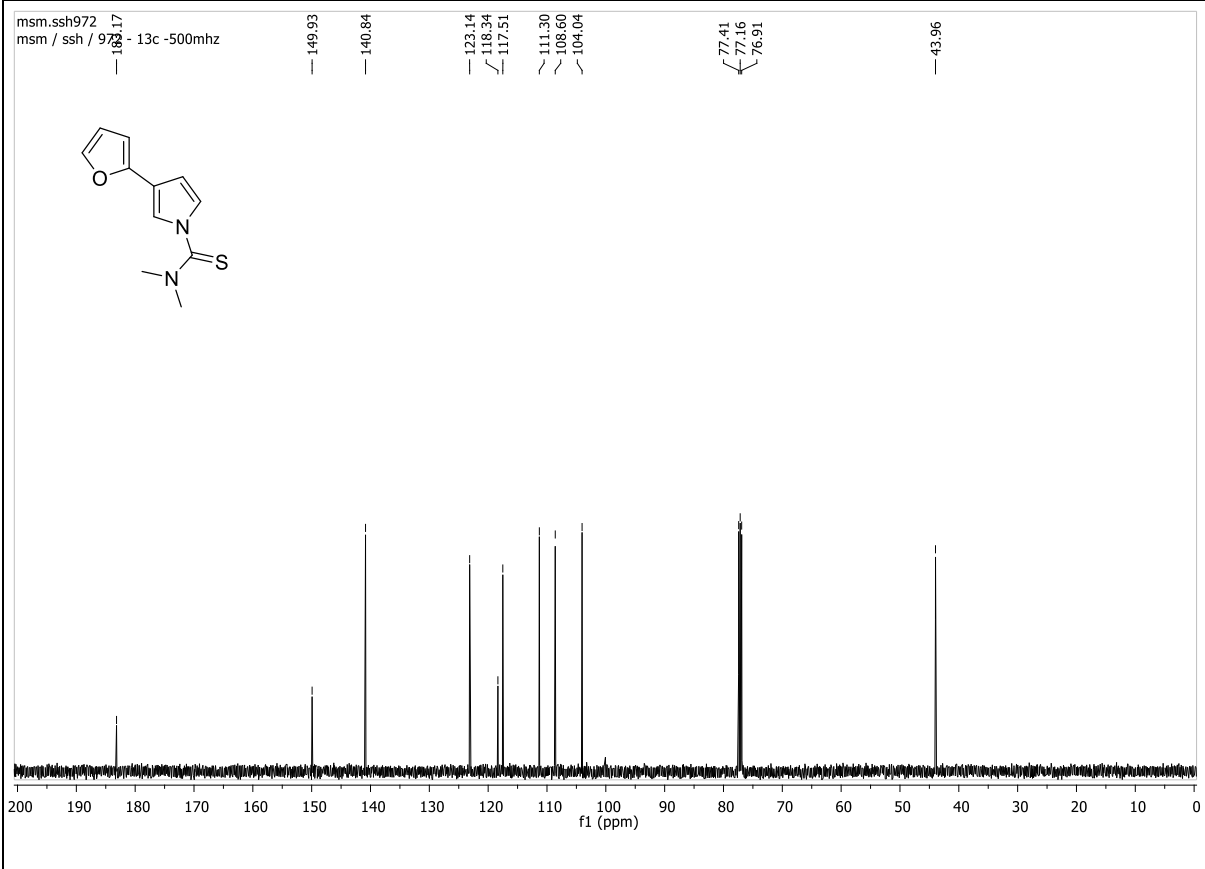

# <sup>1</sup>H NMR and <sup>13</sup>C NMR Spectra of Compound **1d**

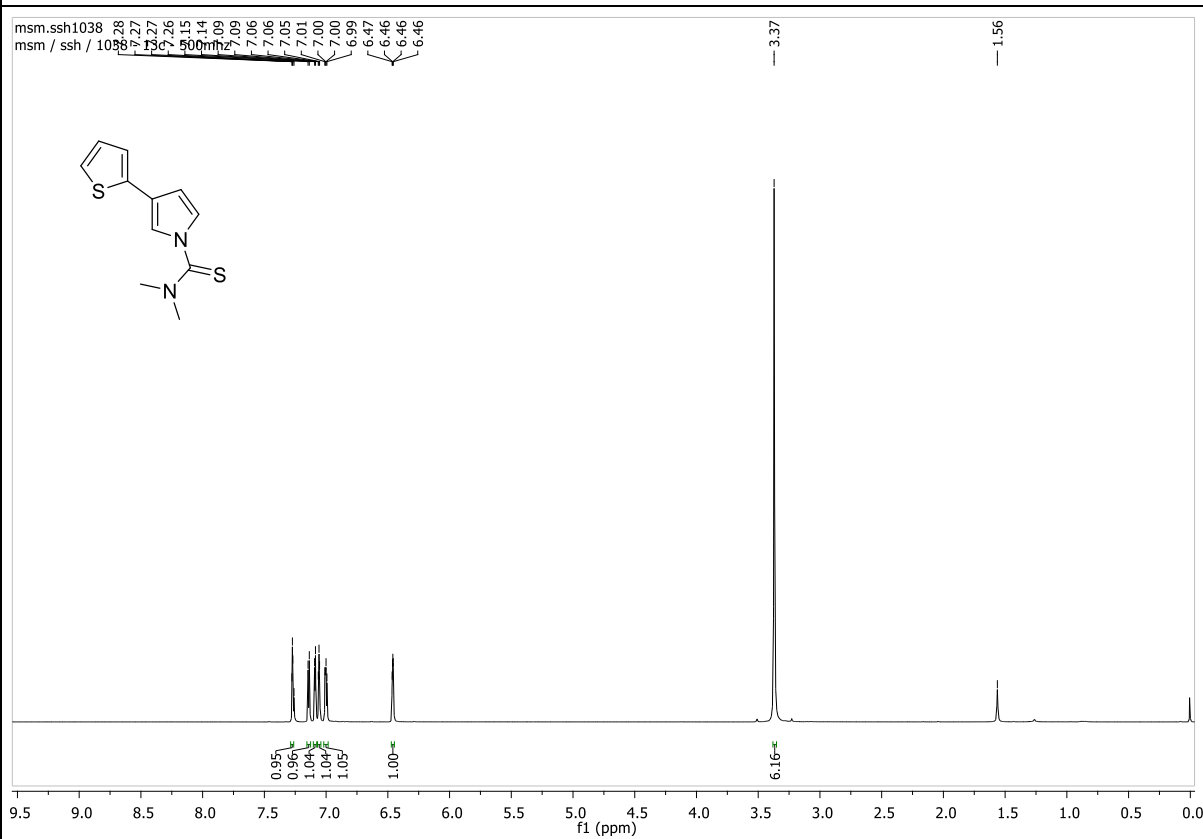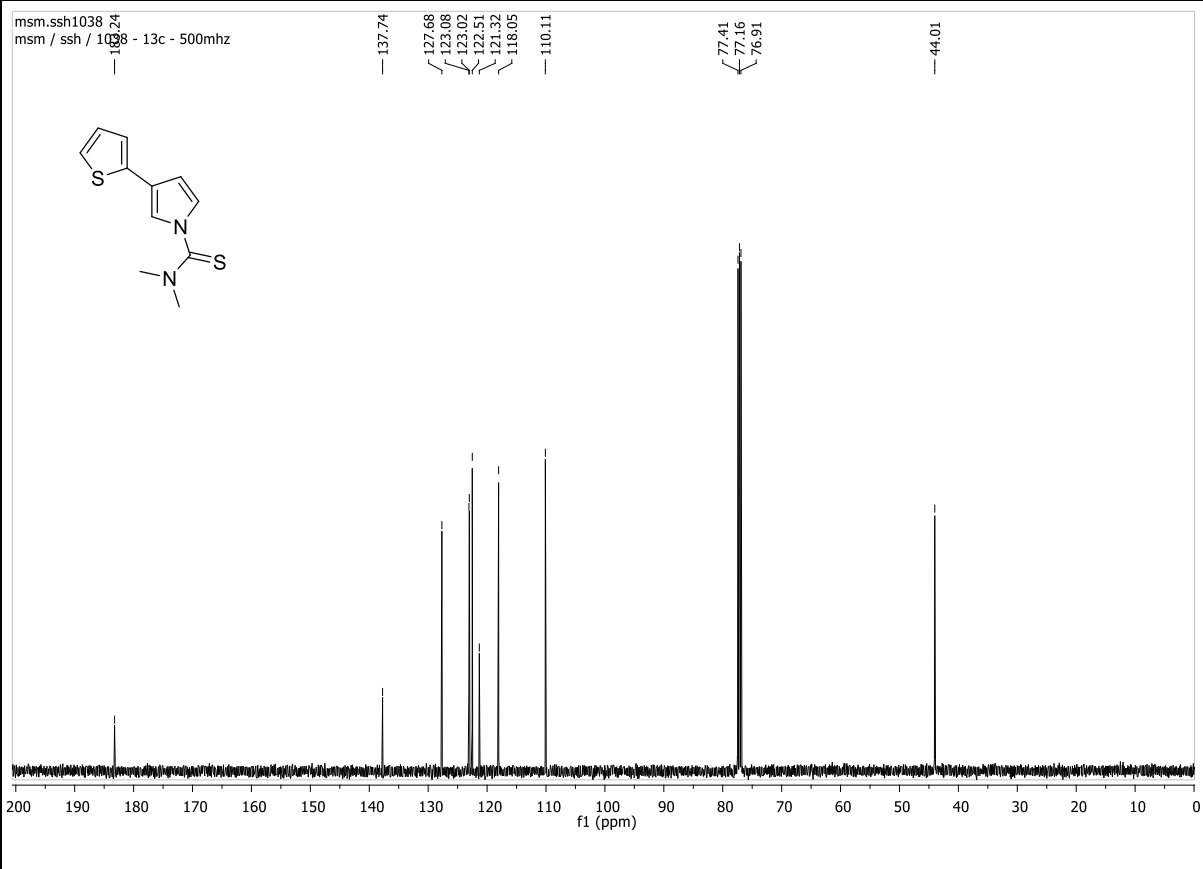

# $^1\text{H}$ NMR and $^{13}\text{C}$ NMR Spectra of Compound **1e**

mzm.ssh1034  
mzm / ssh / 1034 -1h -400MHz

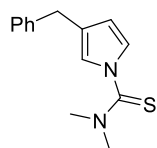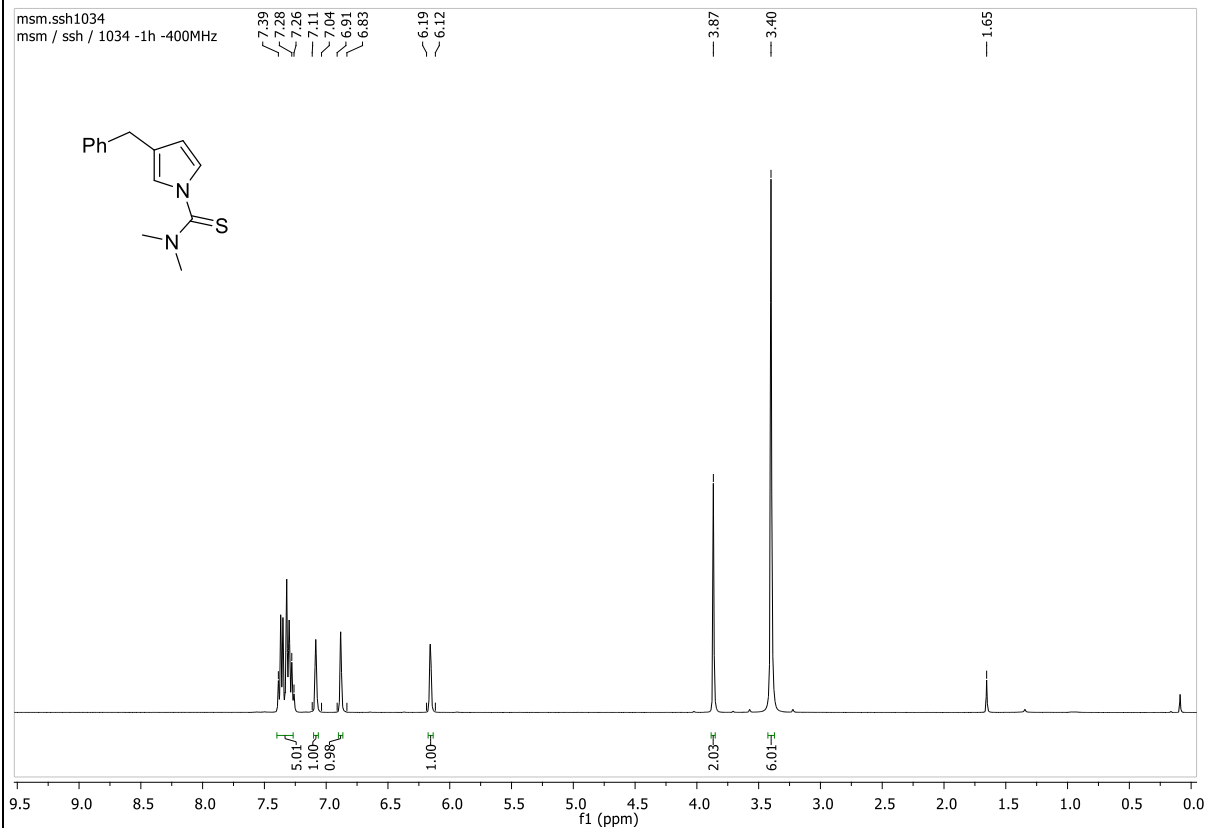

mzm.ssh1034.66  
mzm / ssh / 1034 -13C -400MHz

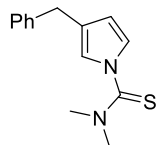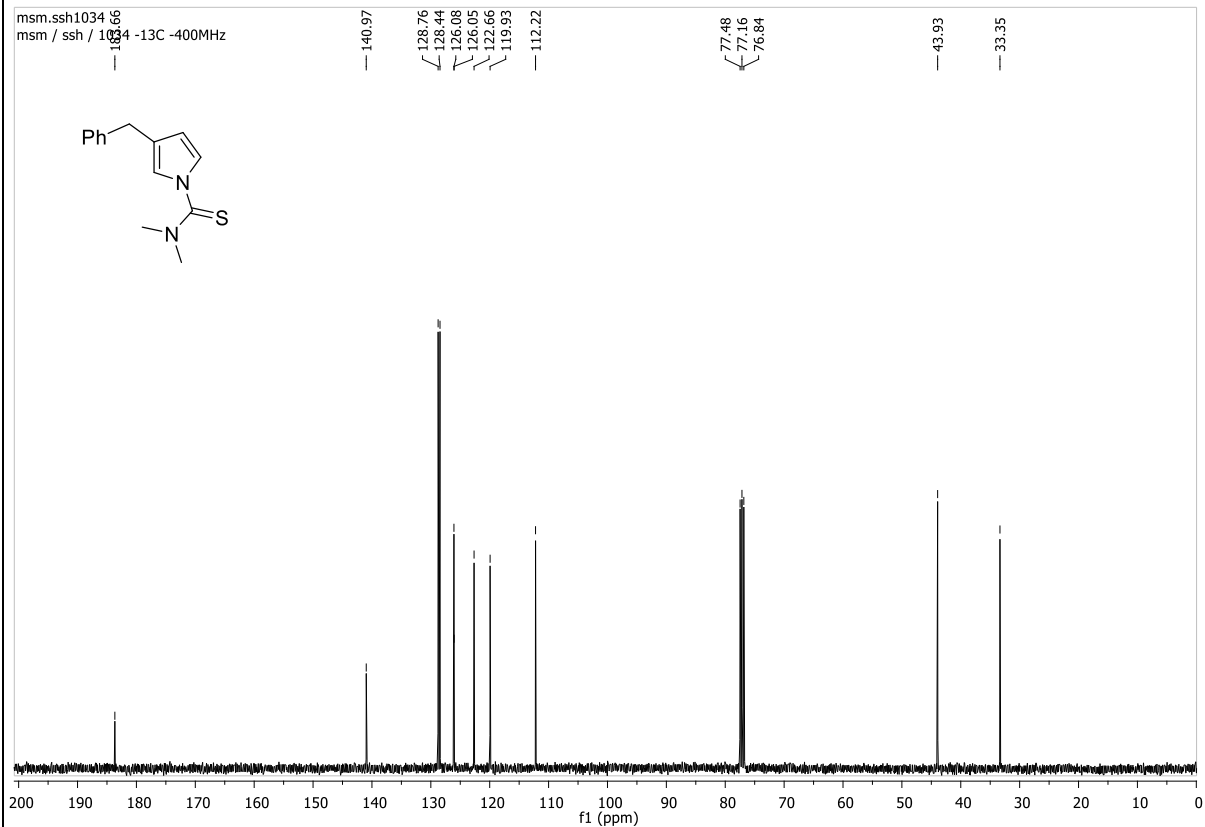

# <sup>1</sup>H NMR and <sup>13</sup>C NMR Spectra of Compound **1f**

mzm.ssh1063  
mzm / ssh / 1063-1H -400Mhz

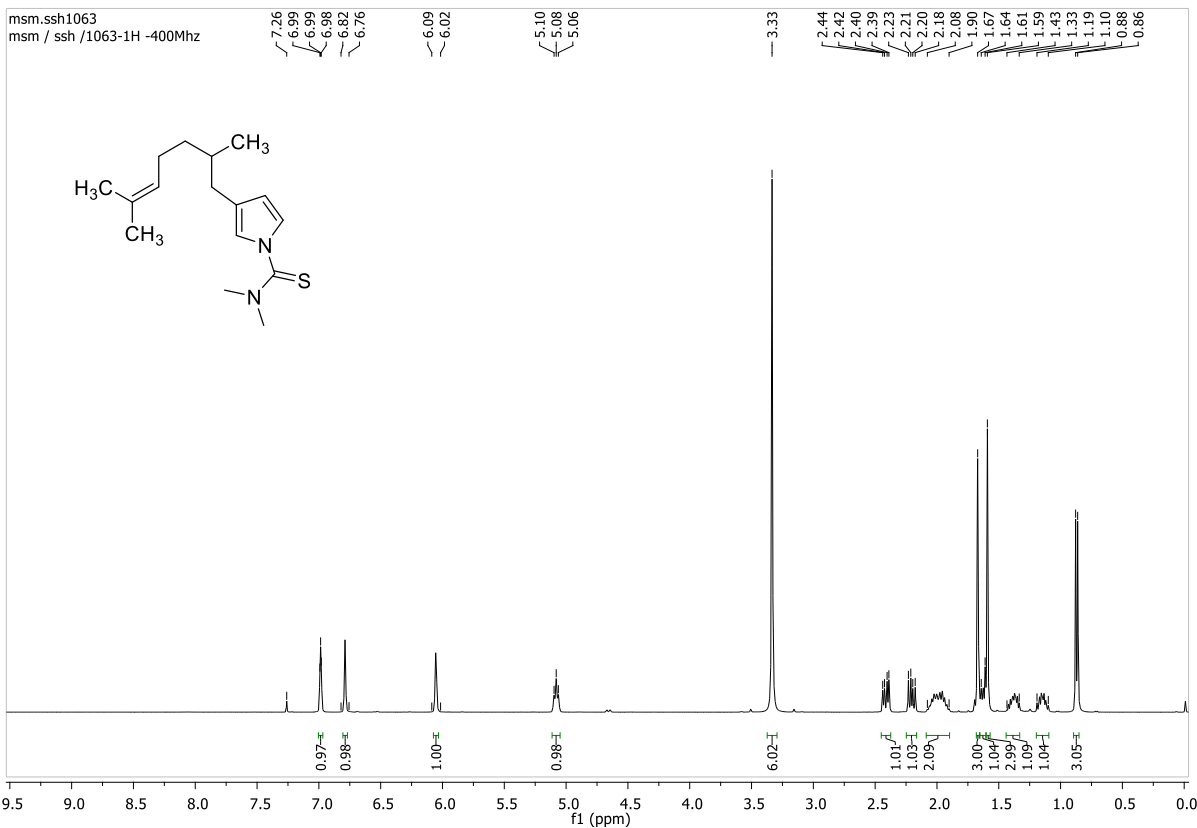

mzm.ssh1063  
mzm / ssh / 1063-13C -400Mhz

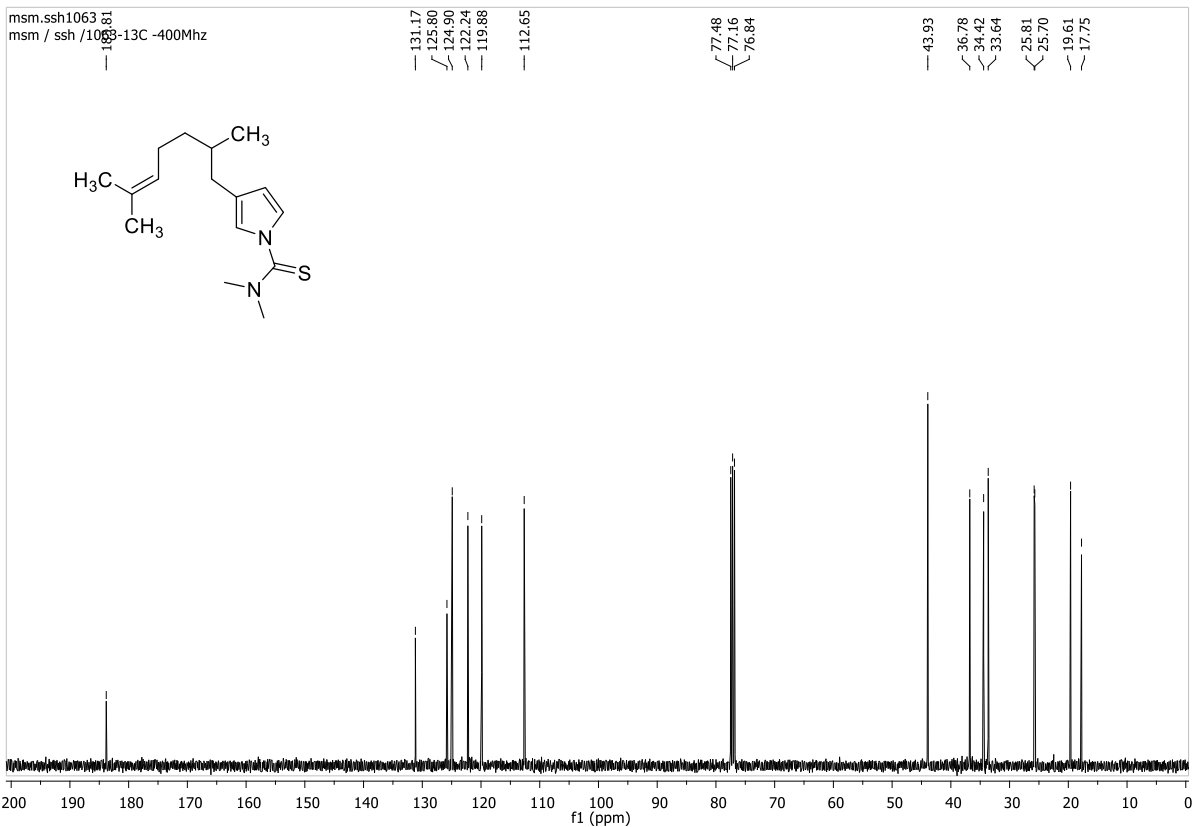

# $^1\text{H}$ NMR and $^{13}\text{C}$ NMR Spectra of Compound **1g**

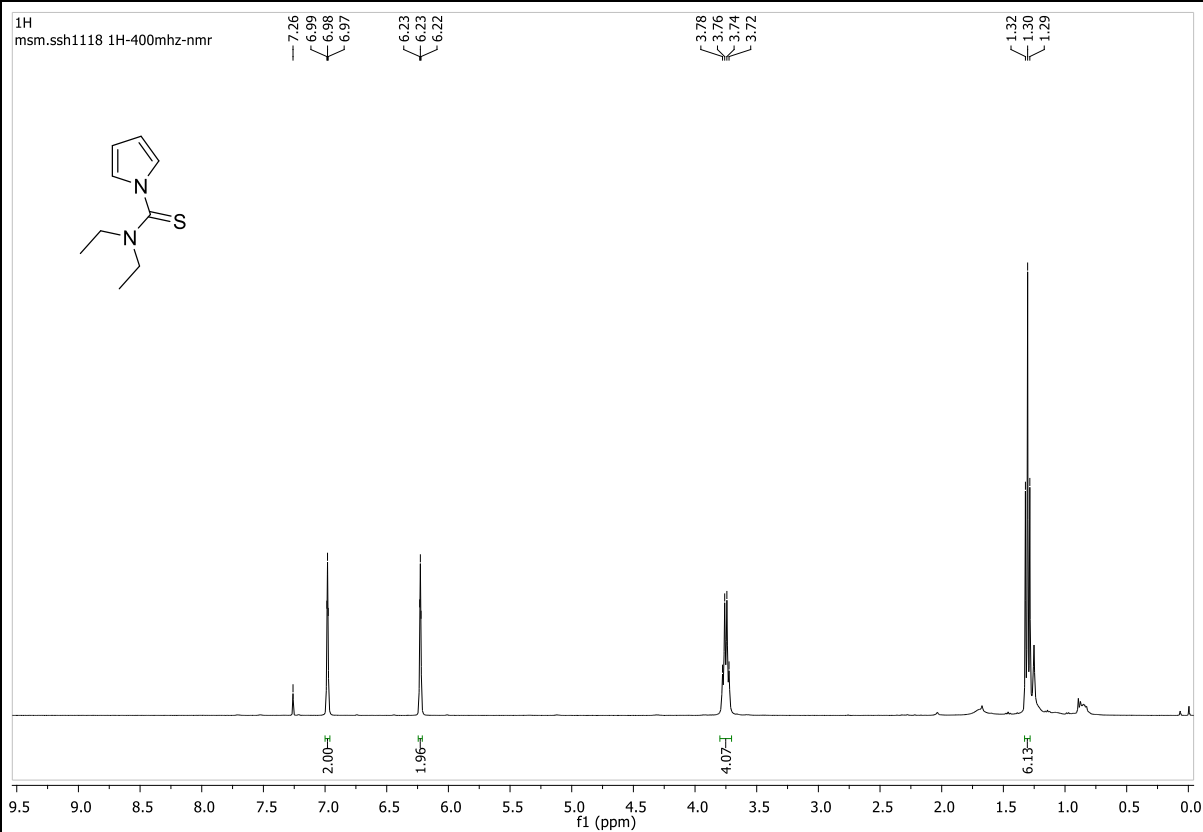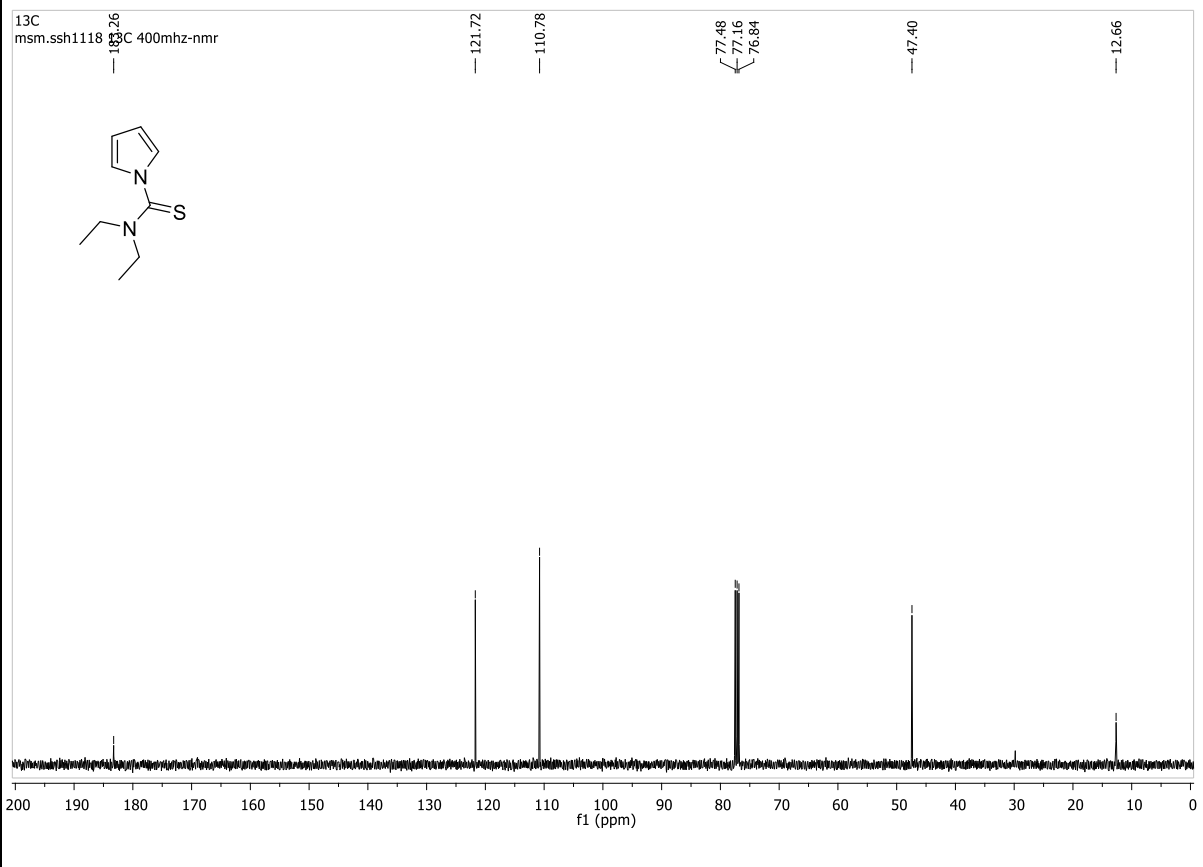

# <sup>1</sup>H NMR and <sup>13</sup>C NMR Spectra of Compound **1h**

<sup>1</sup>H  
msm / ssh / 1123 - 1H - 400mhz

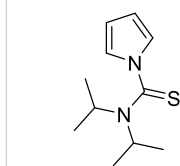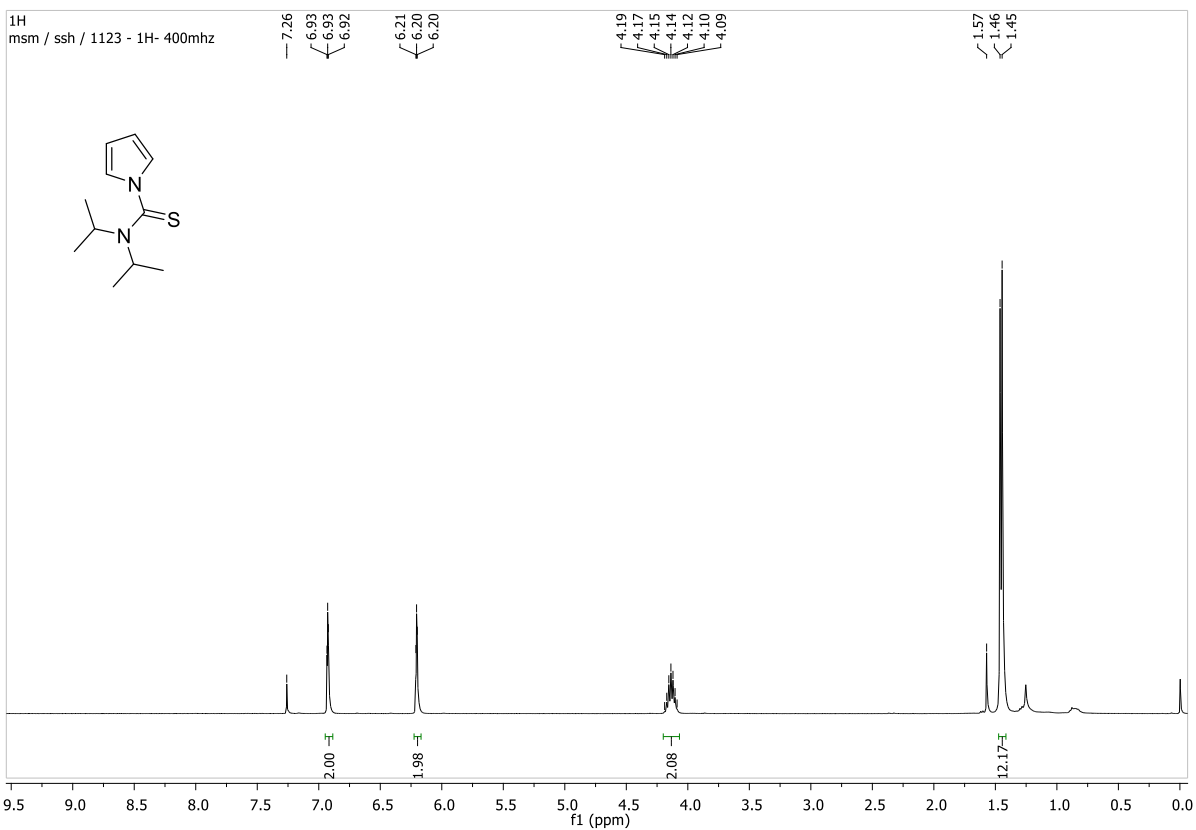

<sup>13</sup>C  
msm / ssh / 1123 - 13c - 400mhz

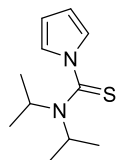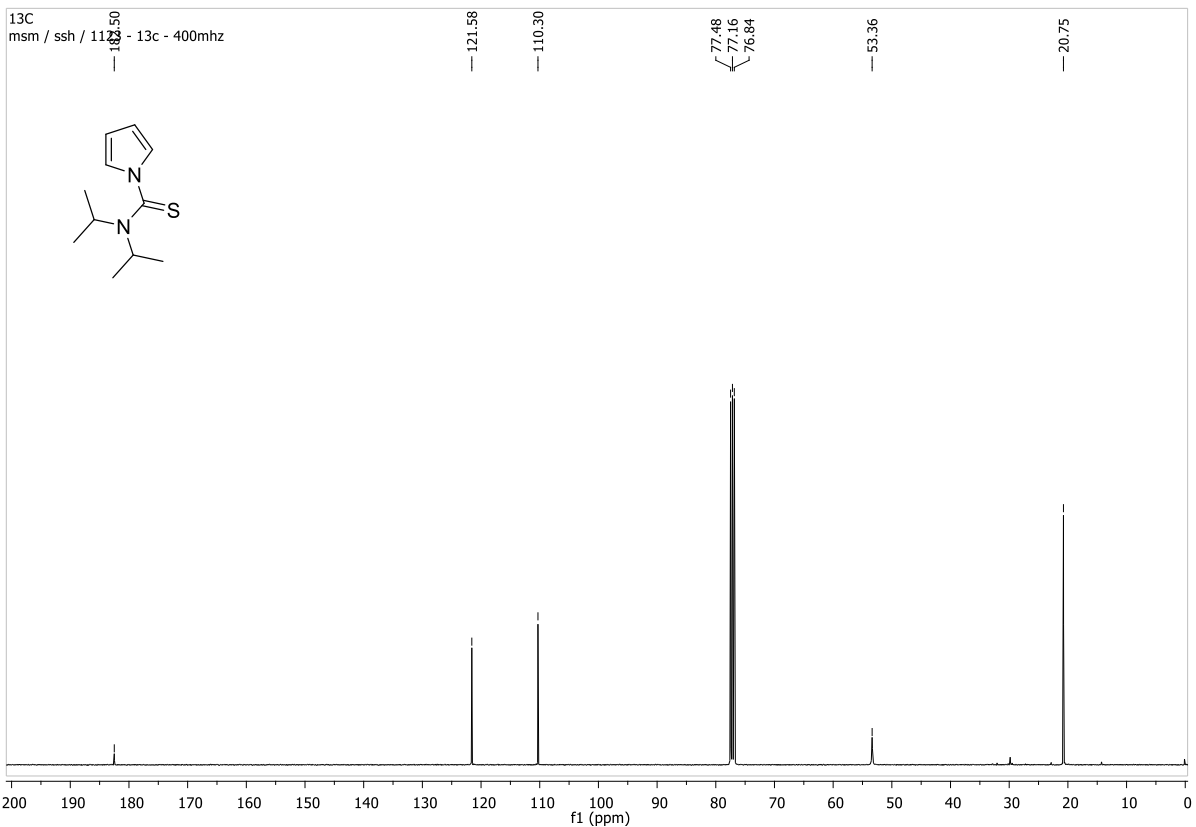

# <sup>1</sup>H NMR and <sup>13</sup>C NMR Spectra of Compound 3a

mzm.ssh1022  
mzm / ssh / 1022-1h-400Mhz

7.55  
7.46  
7.39  
7.37  
7.26  
6.88  
6.88  
6.49  
6.48  
6.48

1.61

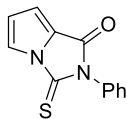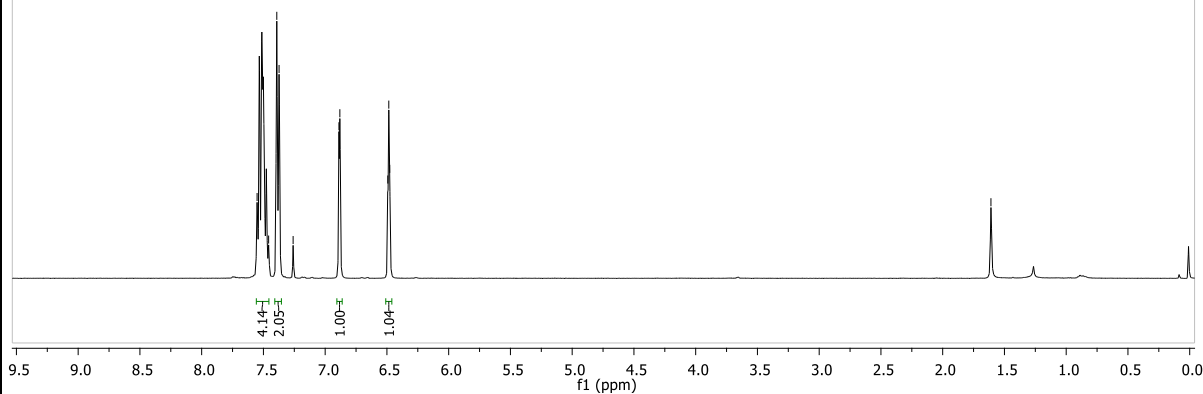

mzm.ssh1022  
mzm / ssh / 1022-13c-400Mhz

178.35

158.15

132.51  
129.42  
129.35  
128.45  
122.09  
120.15  
117.85  
114.57

77.48  
77.16  
76.84

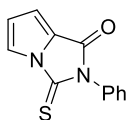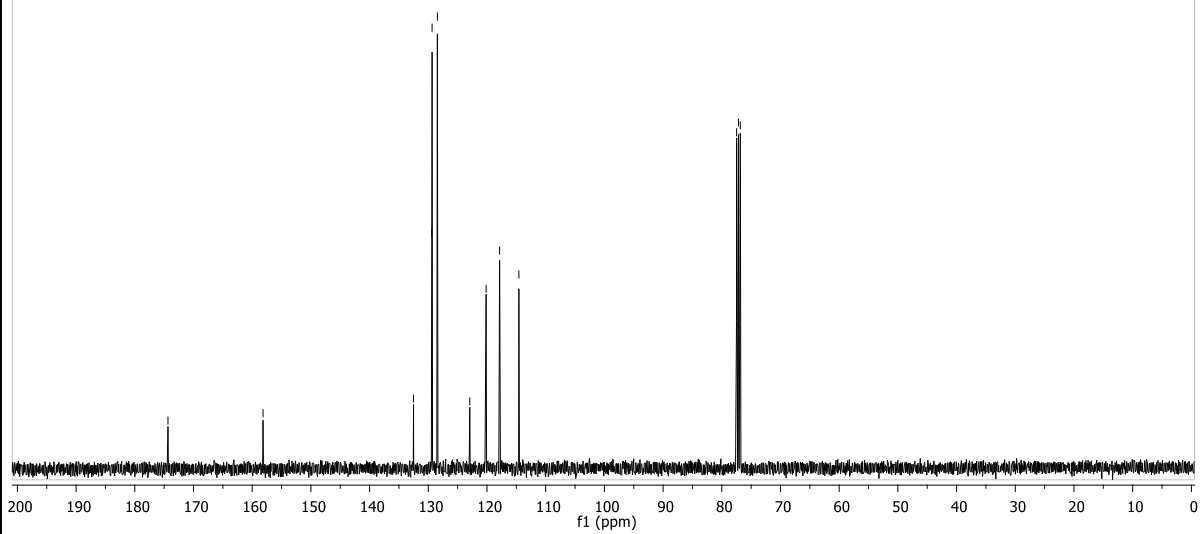

# <sup>1</sup>H NMR and <sup>13</sup>C NMR Spectra of Compound **3b**

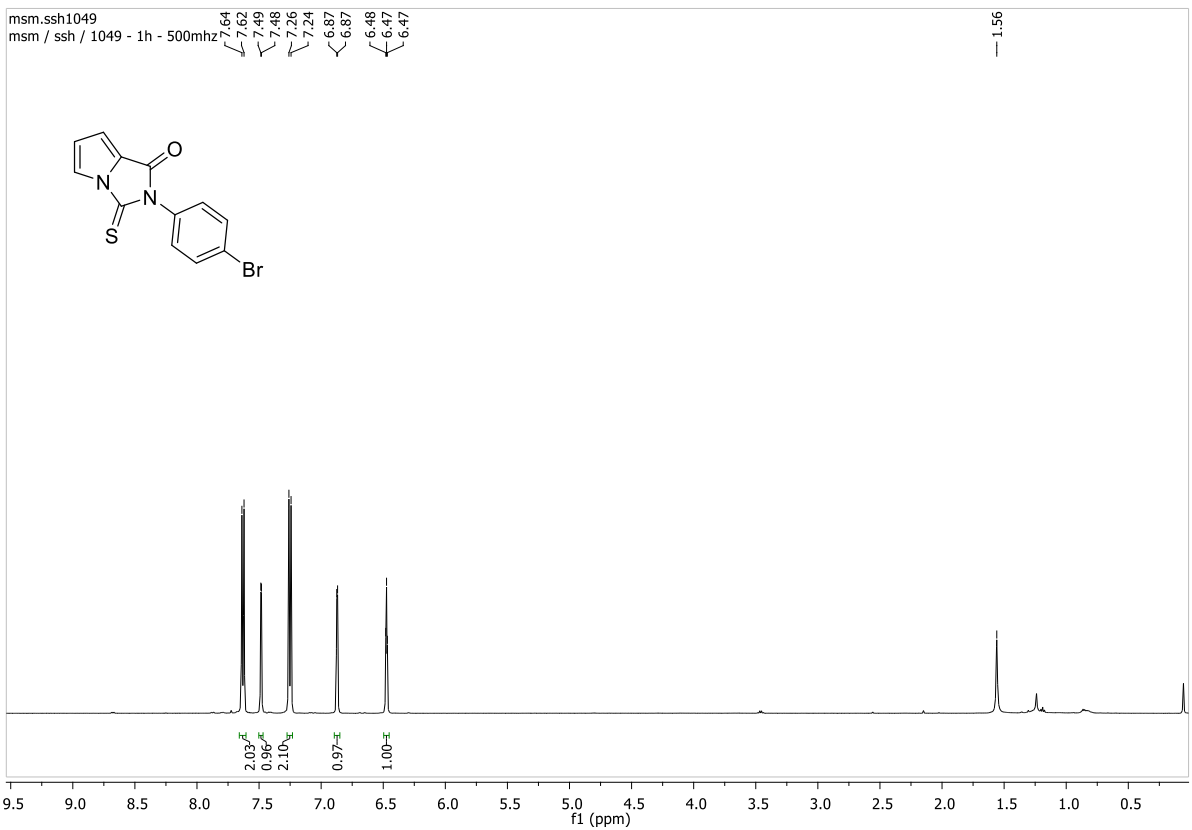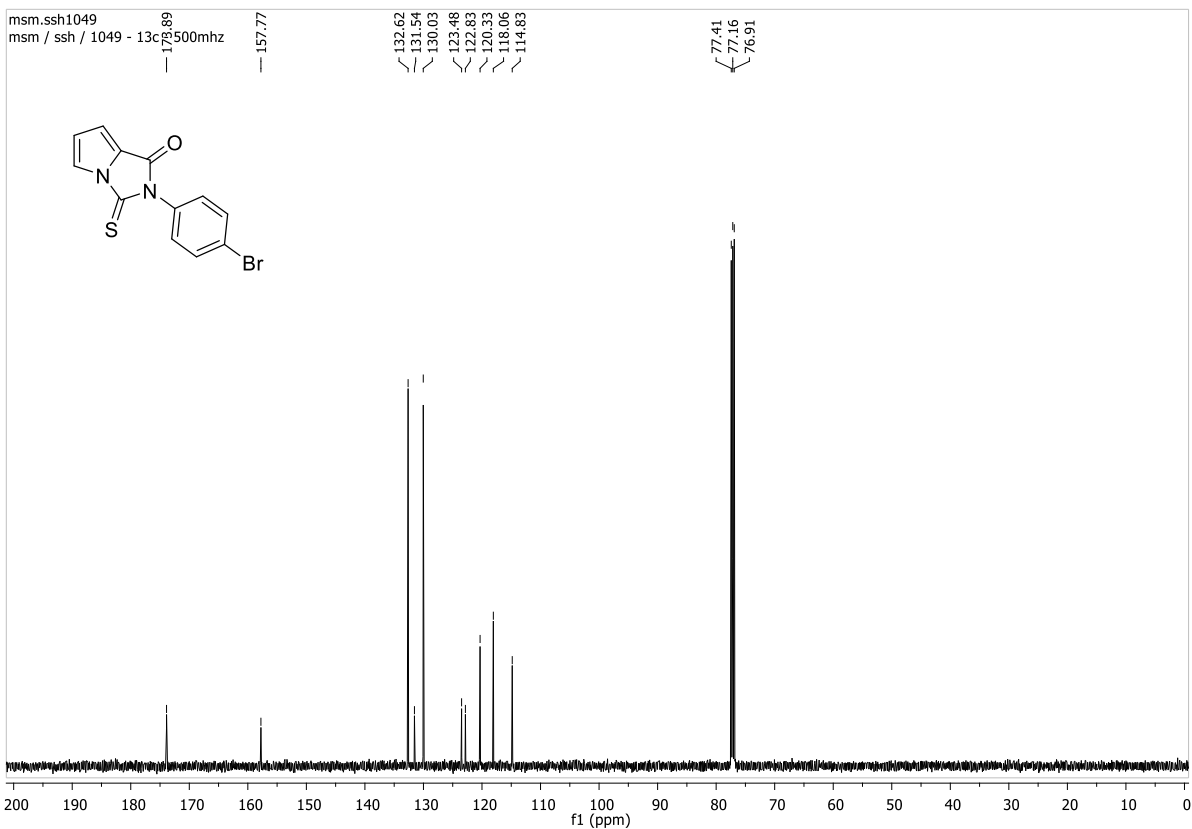



# <sup>1</sup>H NMR and <sup>13</sup>C NMR Spectra of Compound 3c

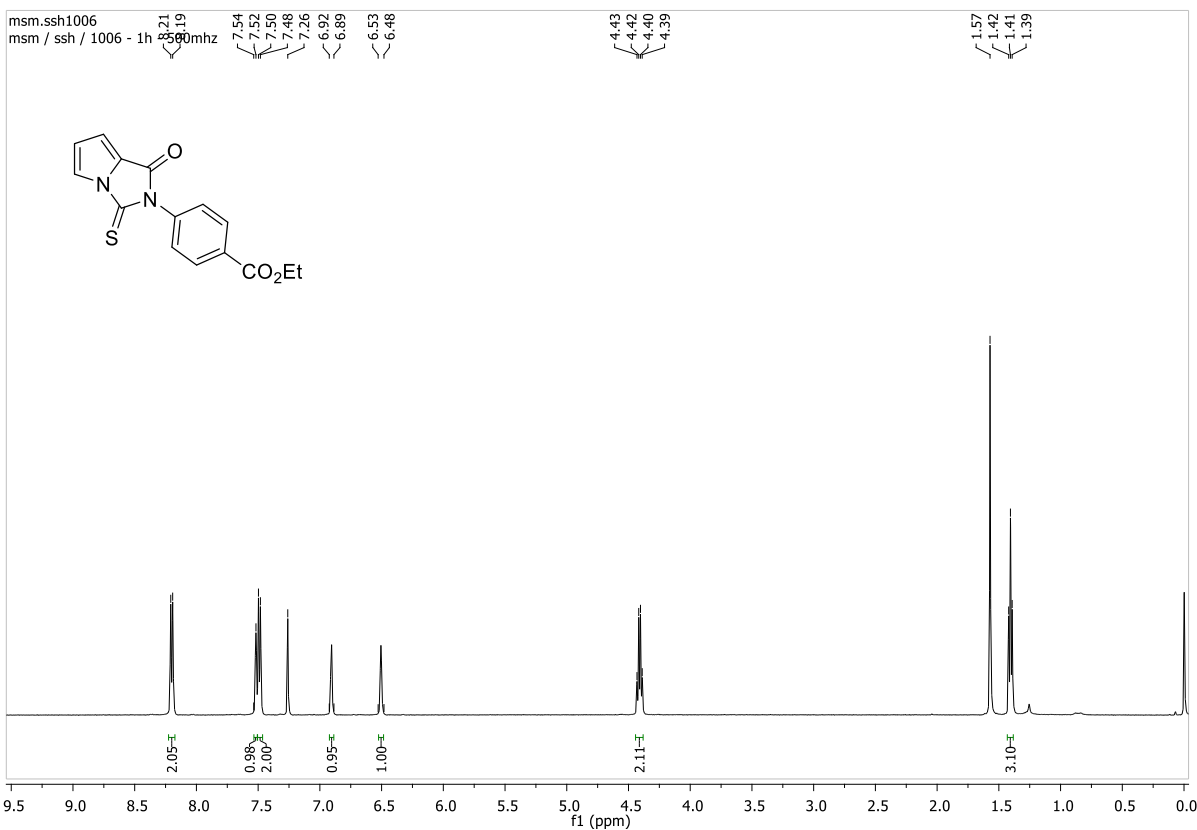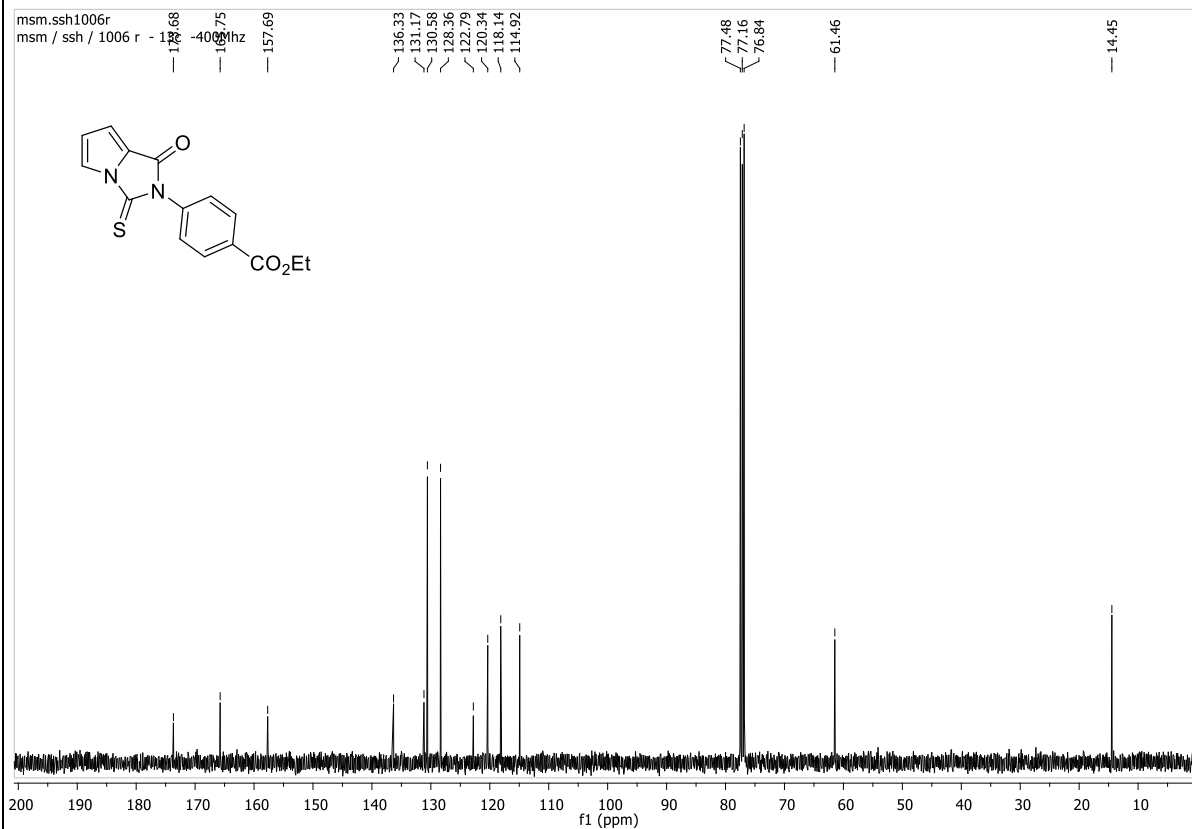

# <sup>1</sup>H NMR and <sup>13</sup>C NMR Spectra of Compound 3d

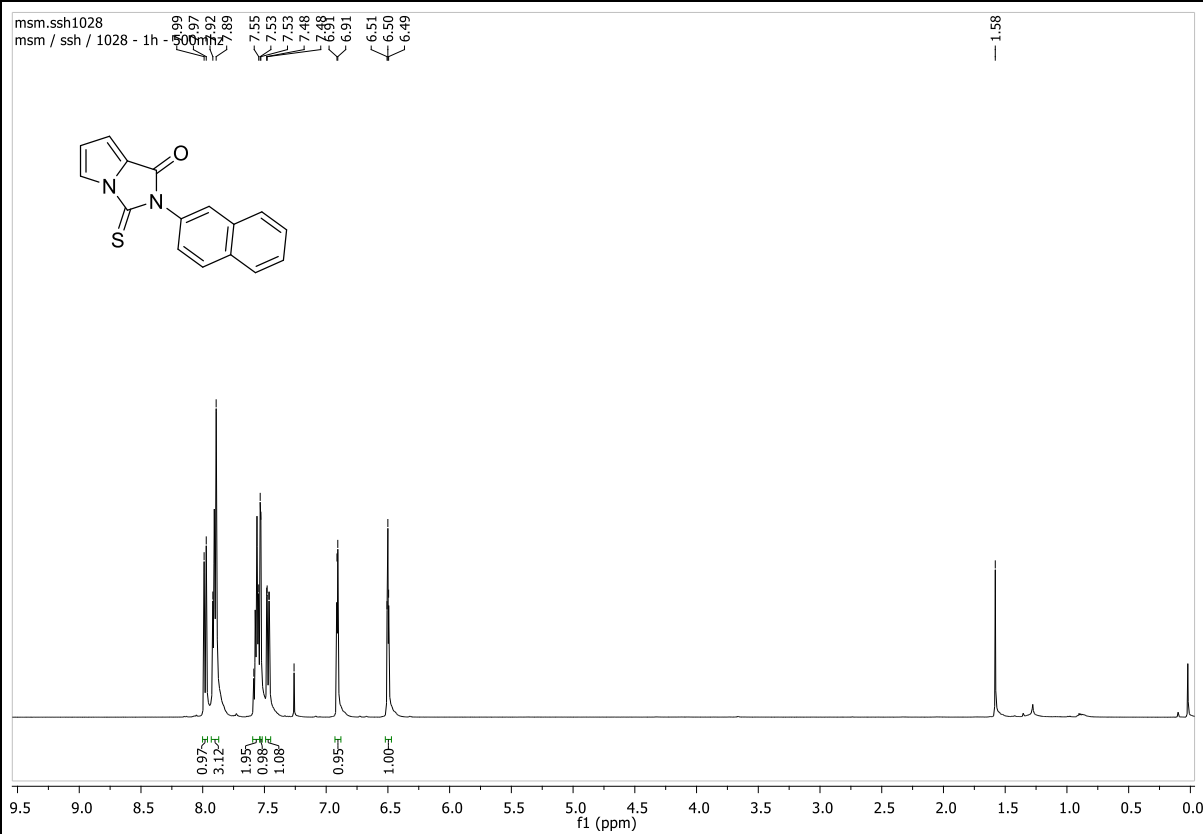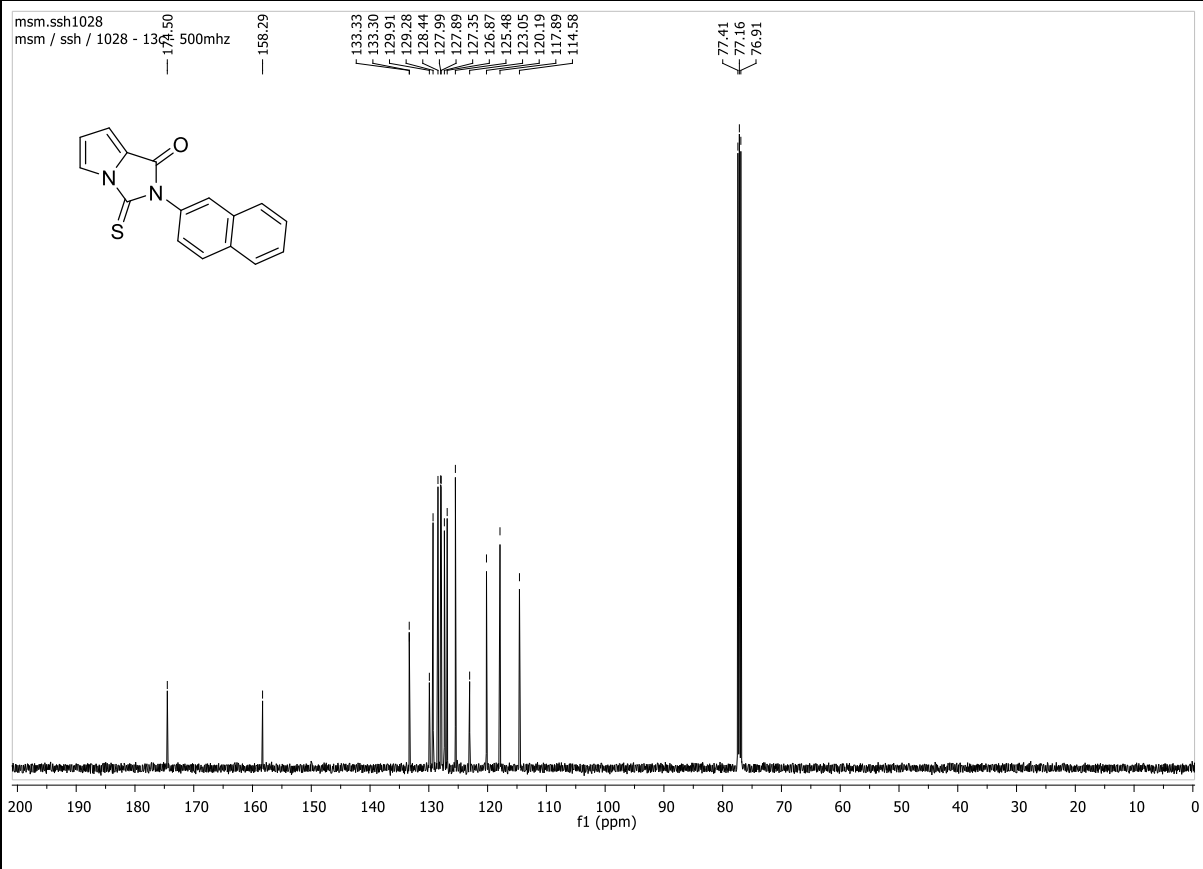

# <sup>1</sup>H NMR and <sup>13</sup>C NMR Spectra of Compound 3e

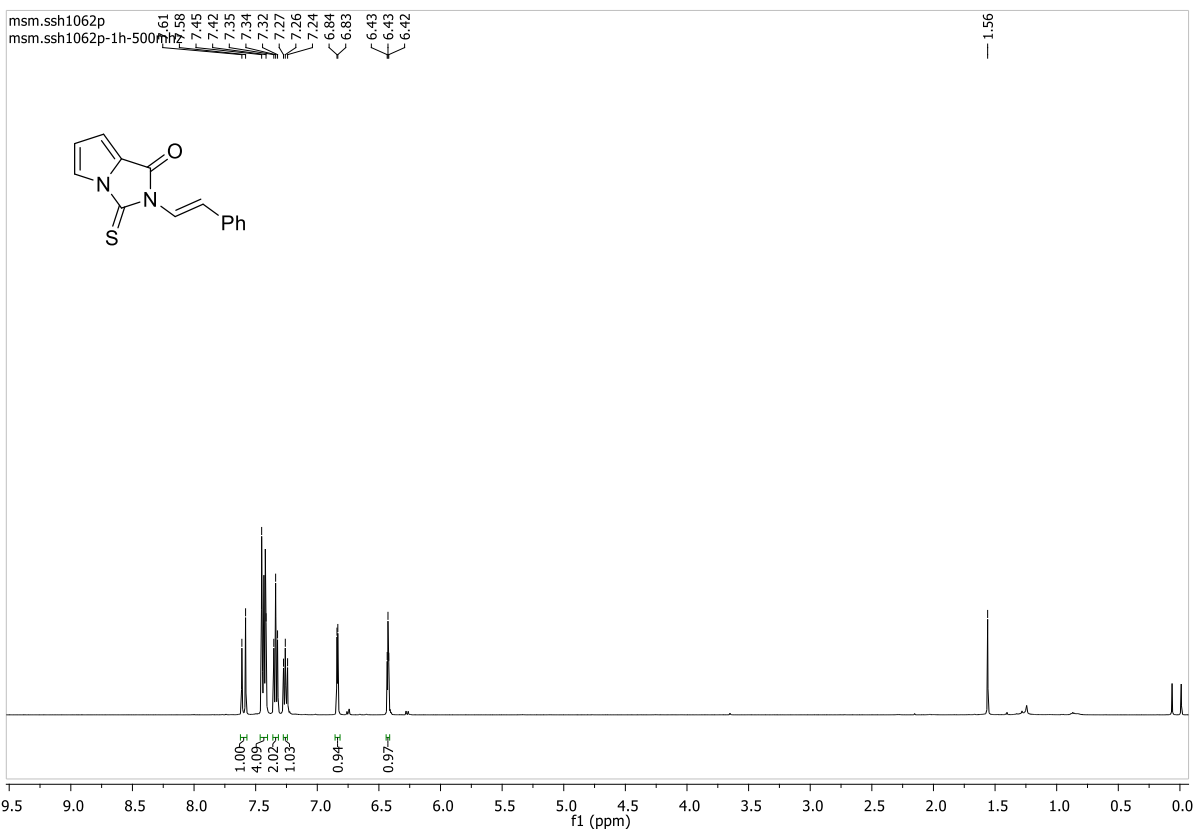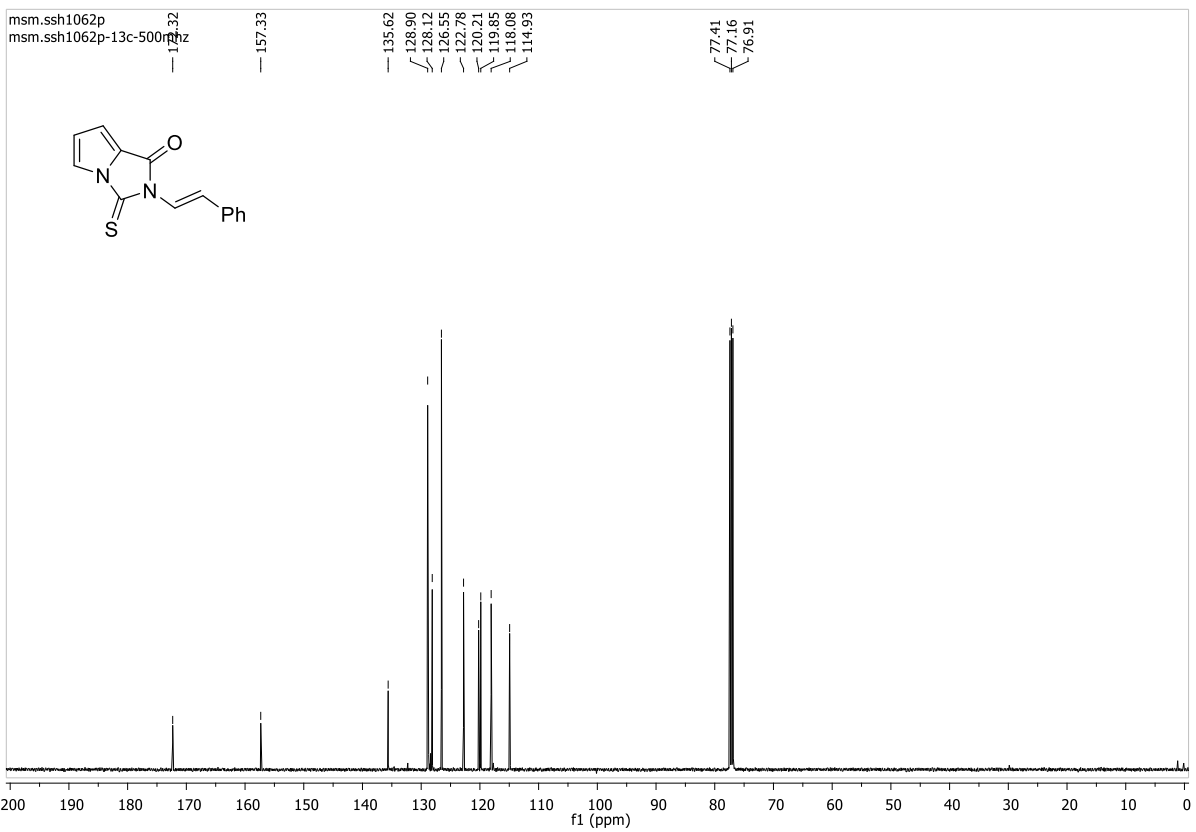

# <sup>1</sup>H NMR and <sup>13</sup>C NMR Spectra of Compound 3f

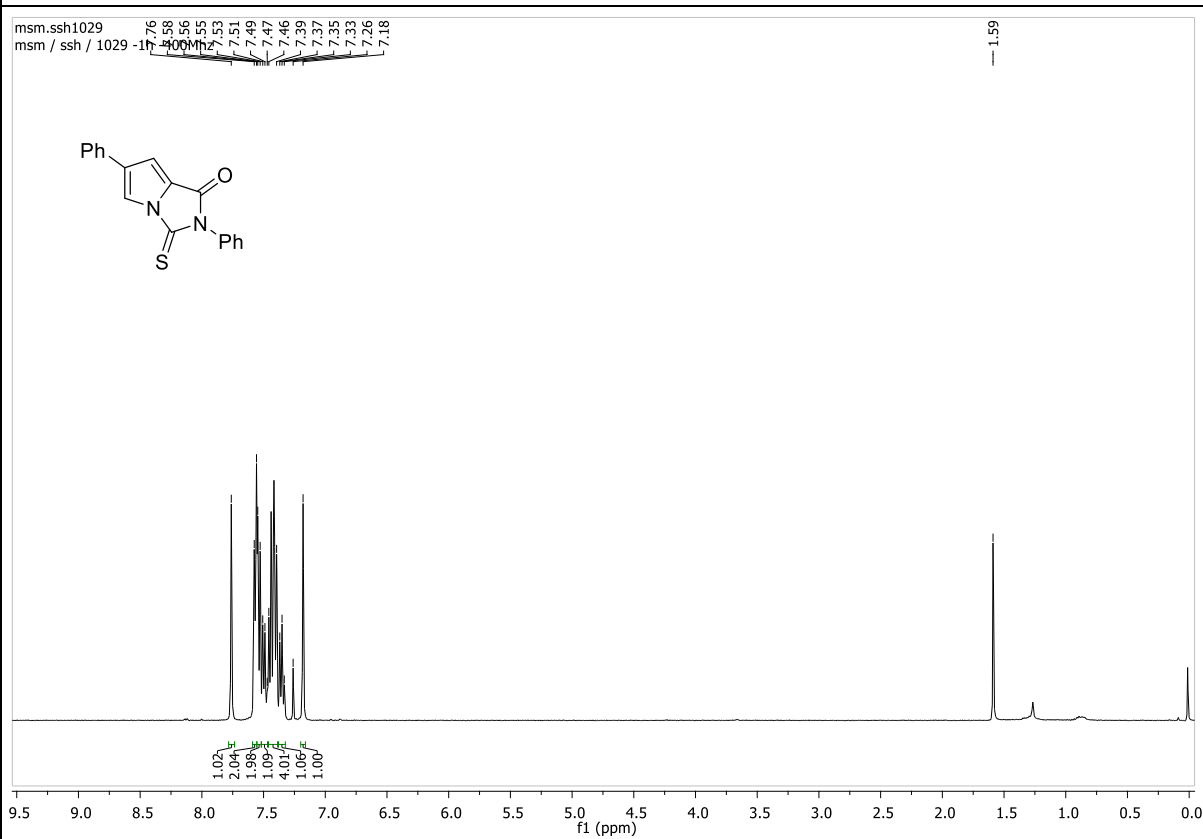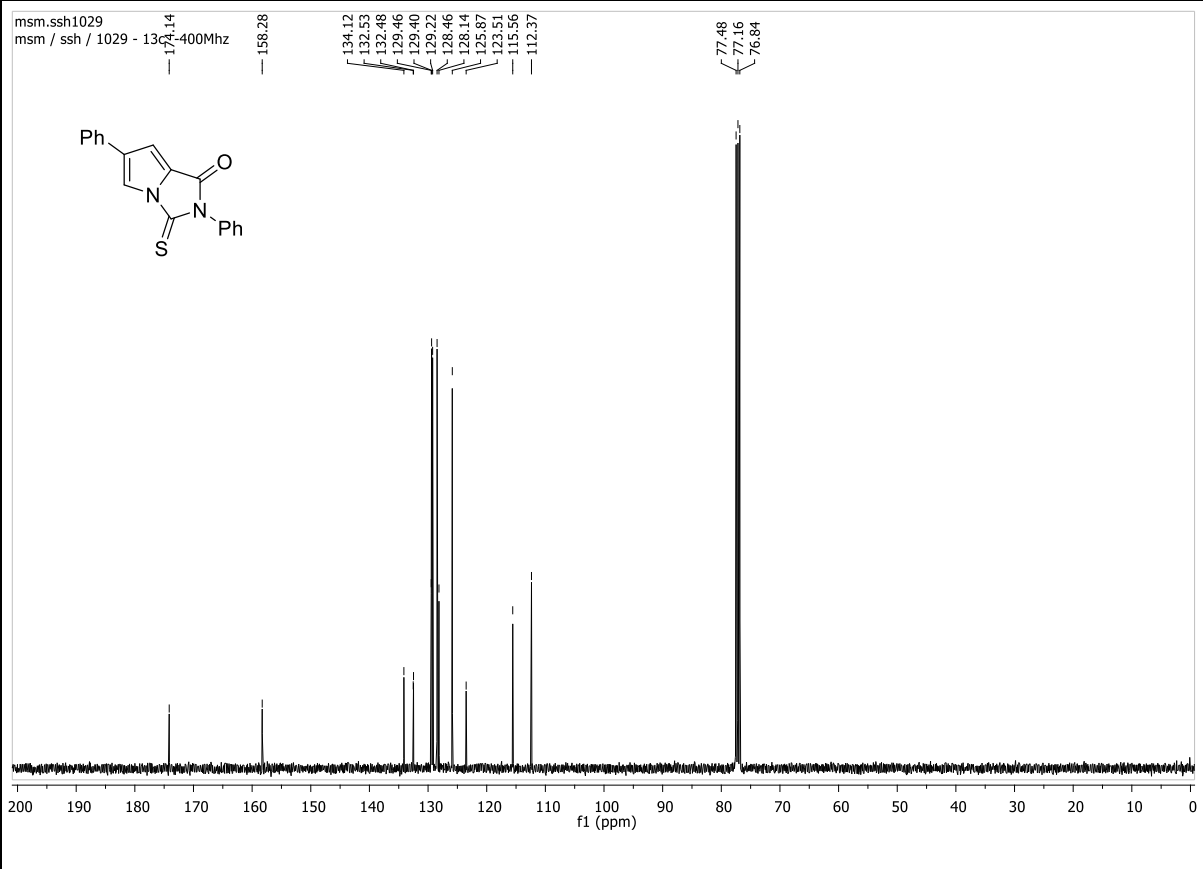

# <sup>1</sup>H NMR and <sup>13</sup>C NMR Spectra of Compound 3g

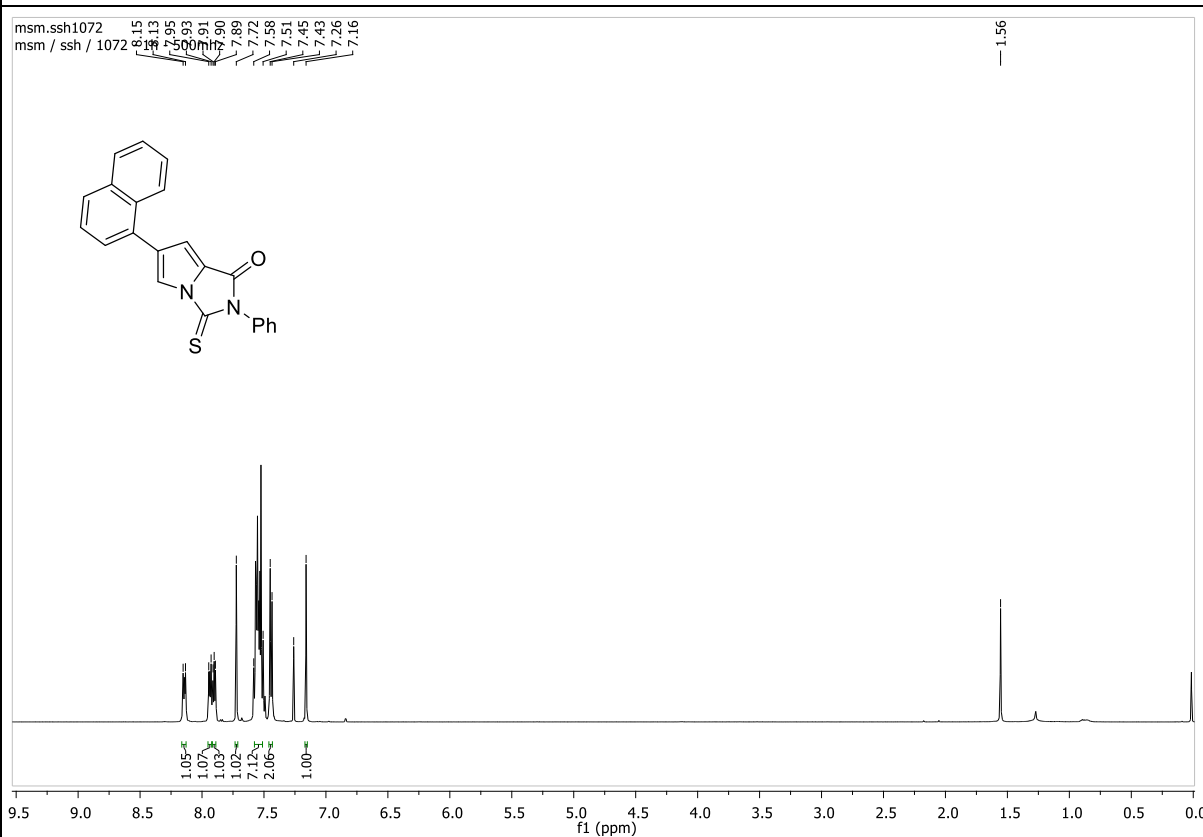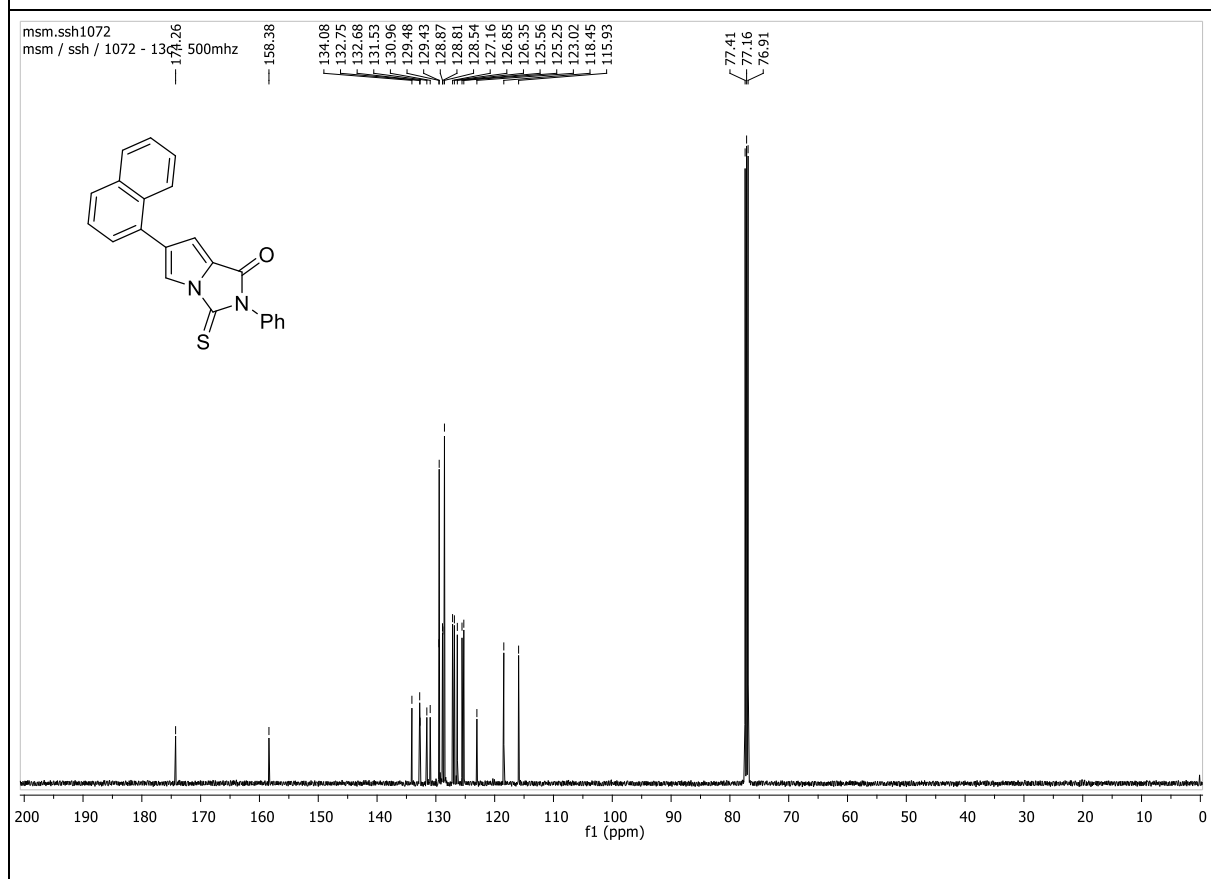

# <sup>1</sup>H NMR and <sup>13</sup>C NMR Spectra of Compound 3h

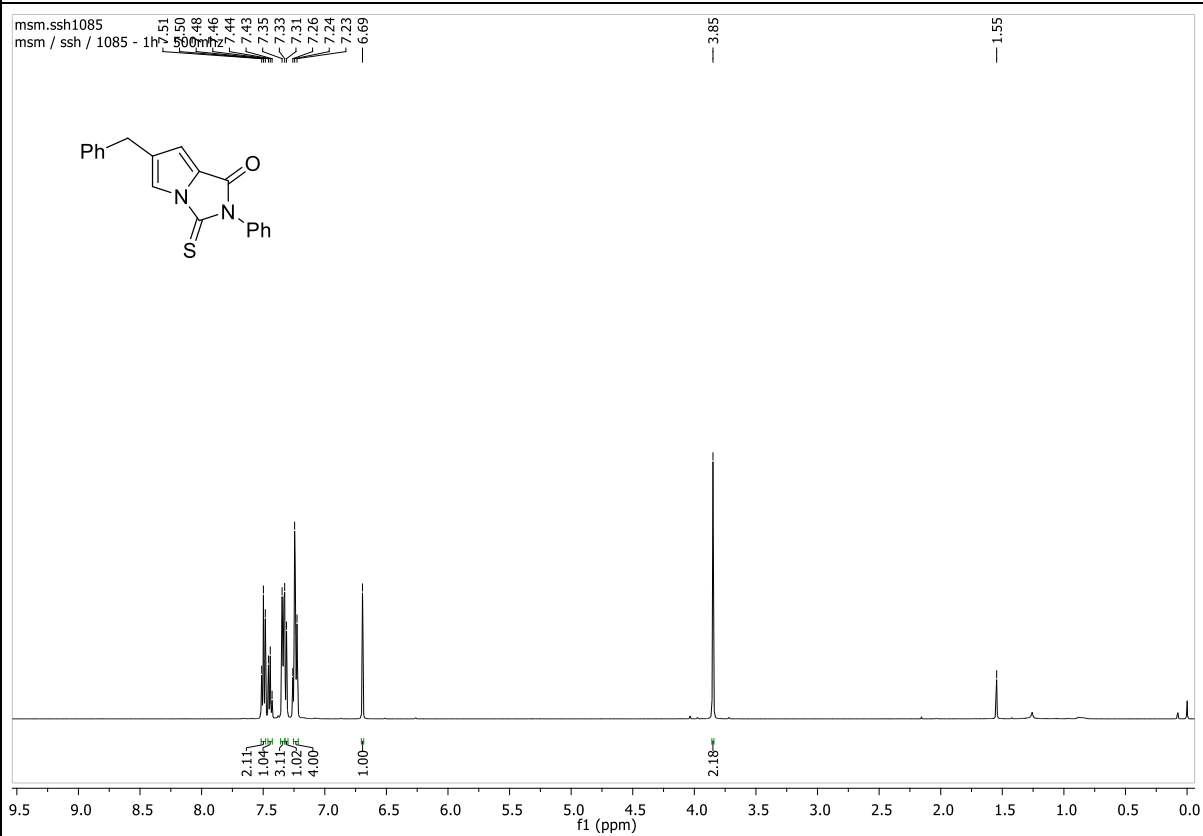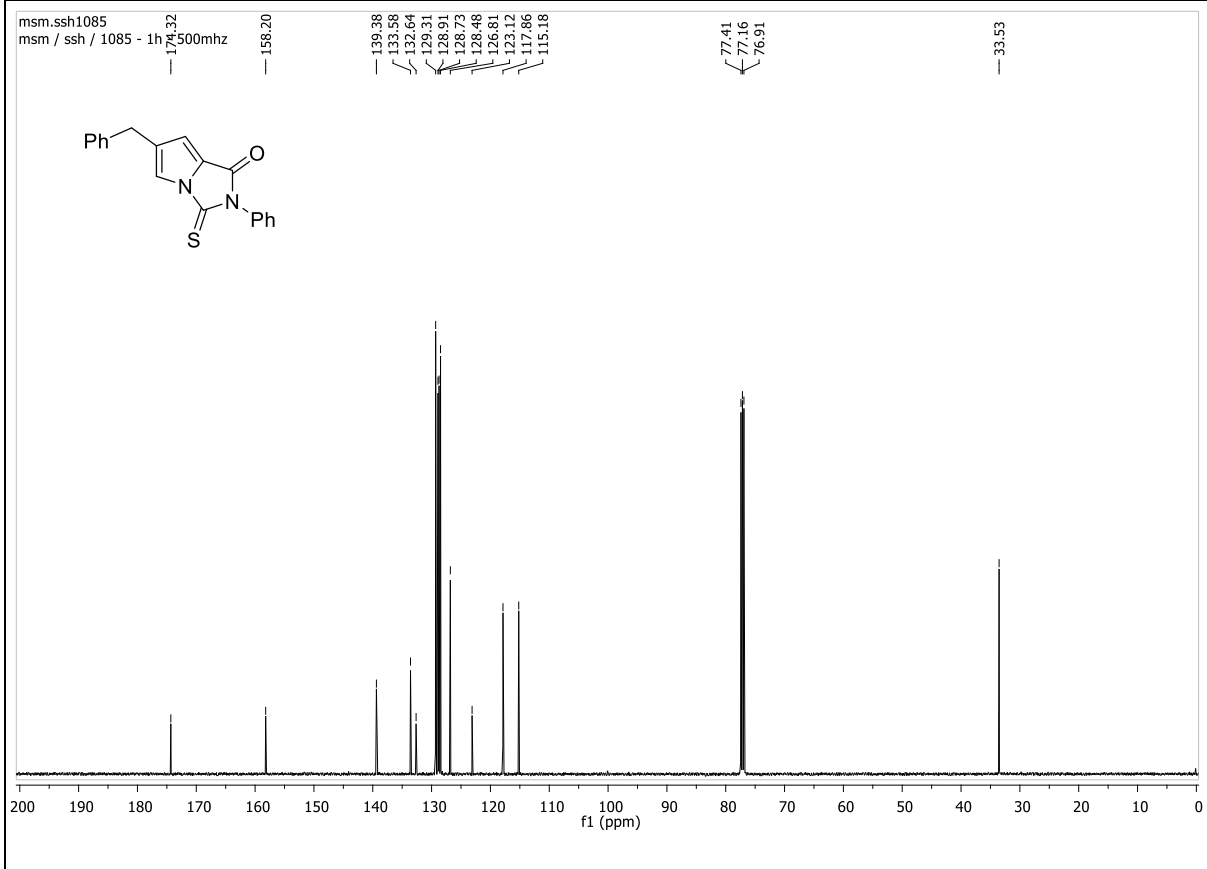

# <sup>1</sup>H NMR and <sup>13</sup>C NMR Spectra of Compound **3i**

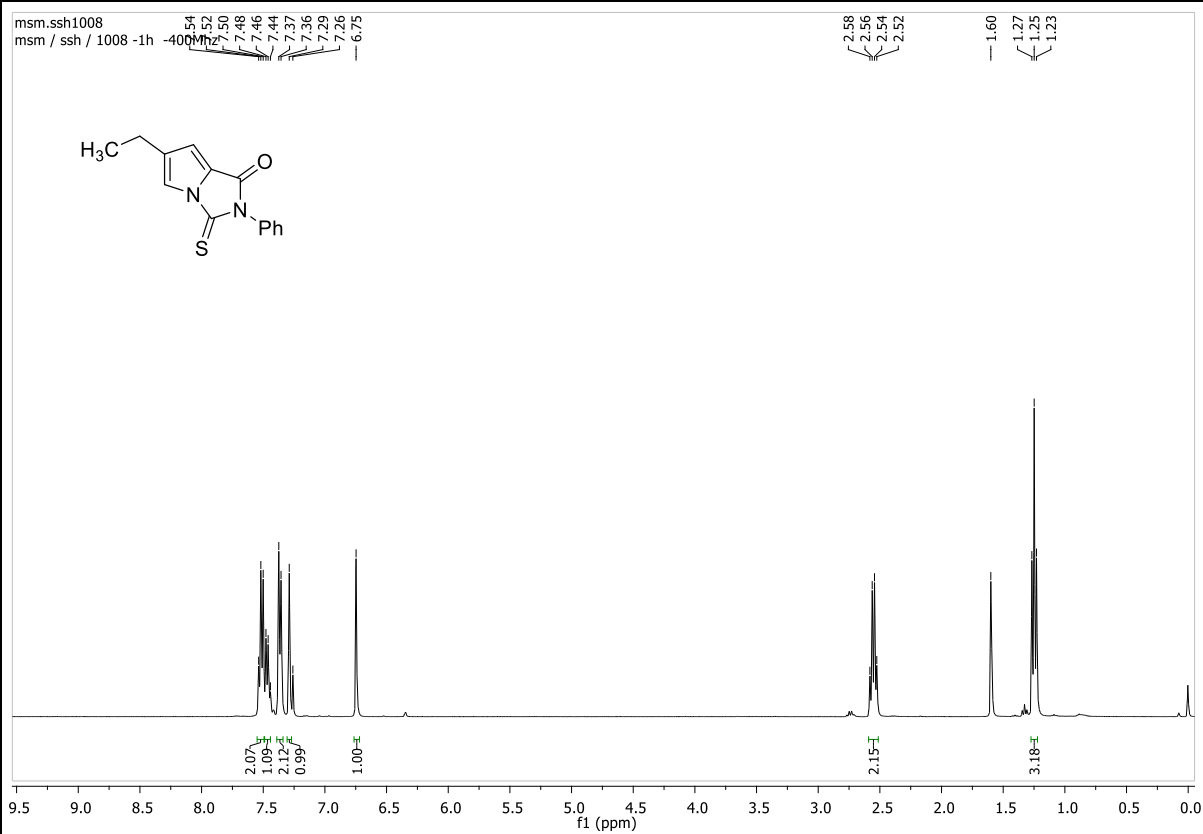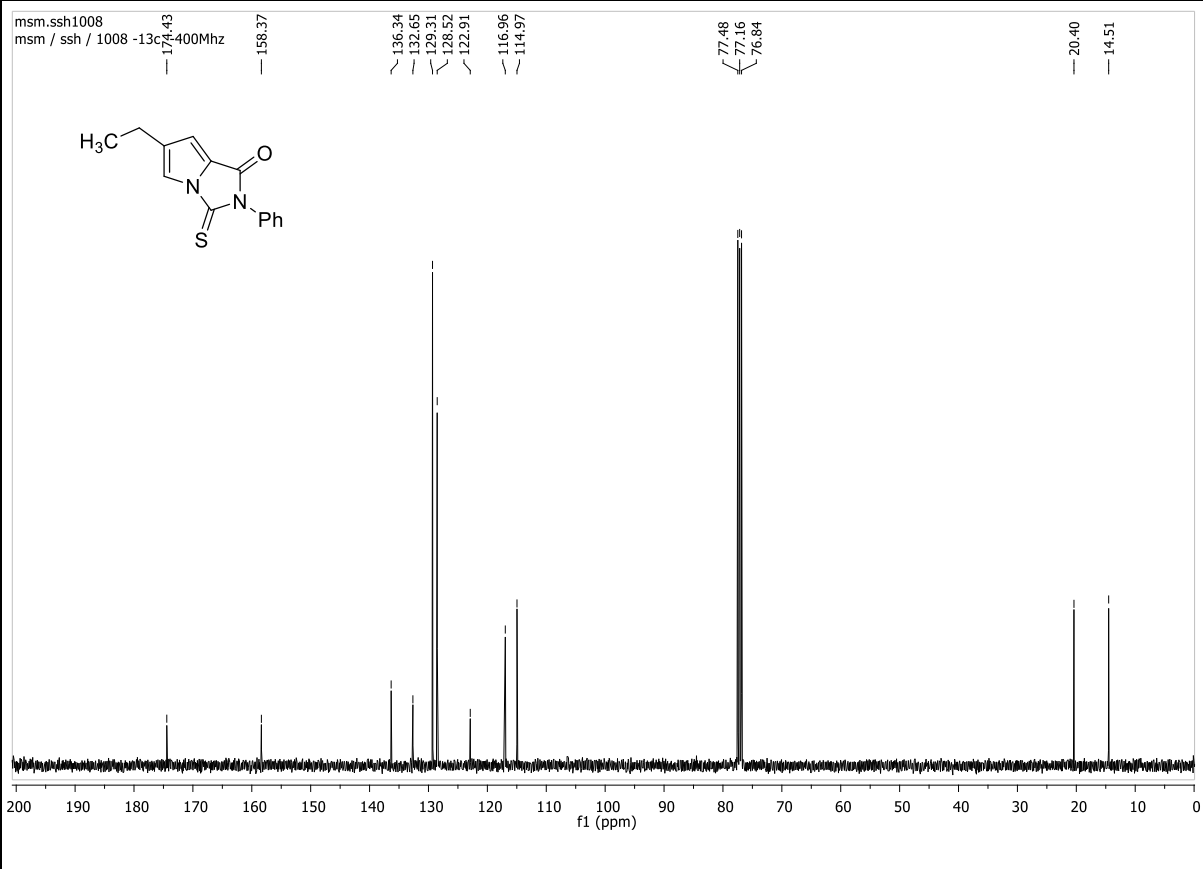

# <sup>1</sup>H NMR and <sup>13</sup>C NMR Spectra of Compound 3j

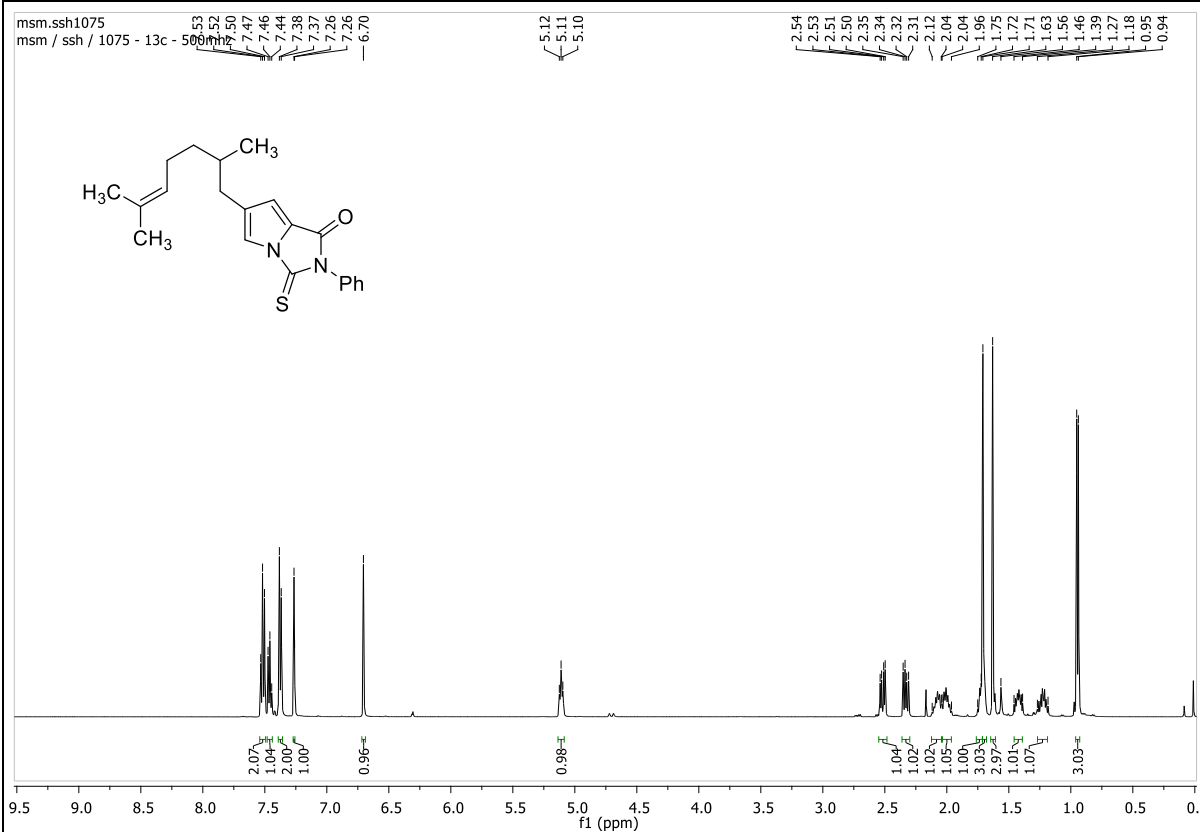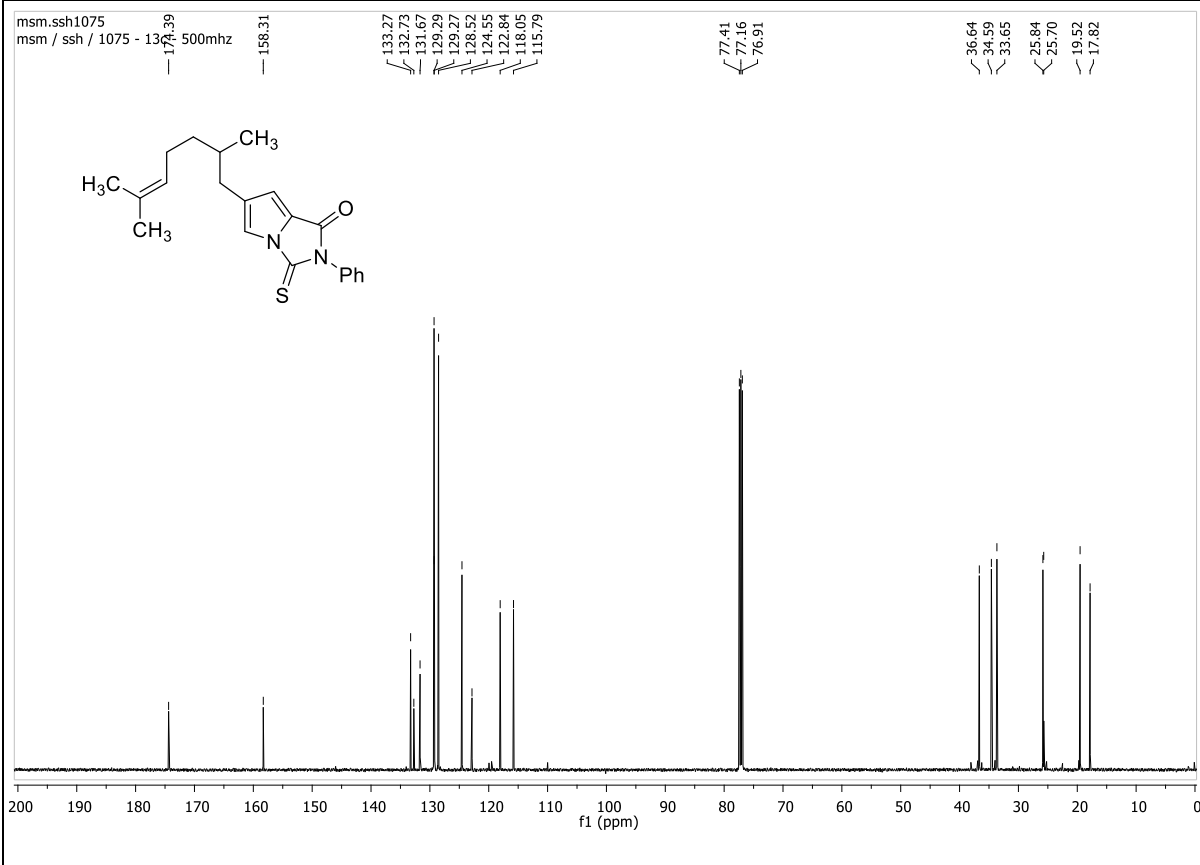



# <sup>1</sup>H NMR and <sup>13</sup>C NMR Spectra of Compound 3k

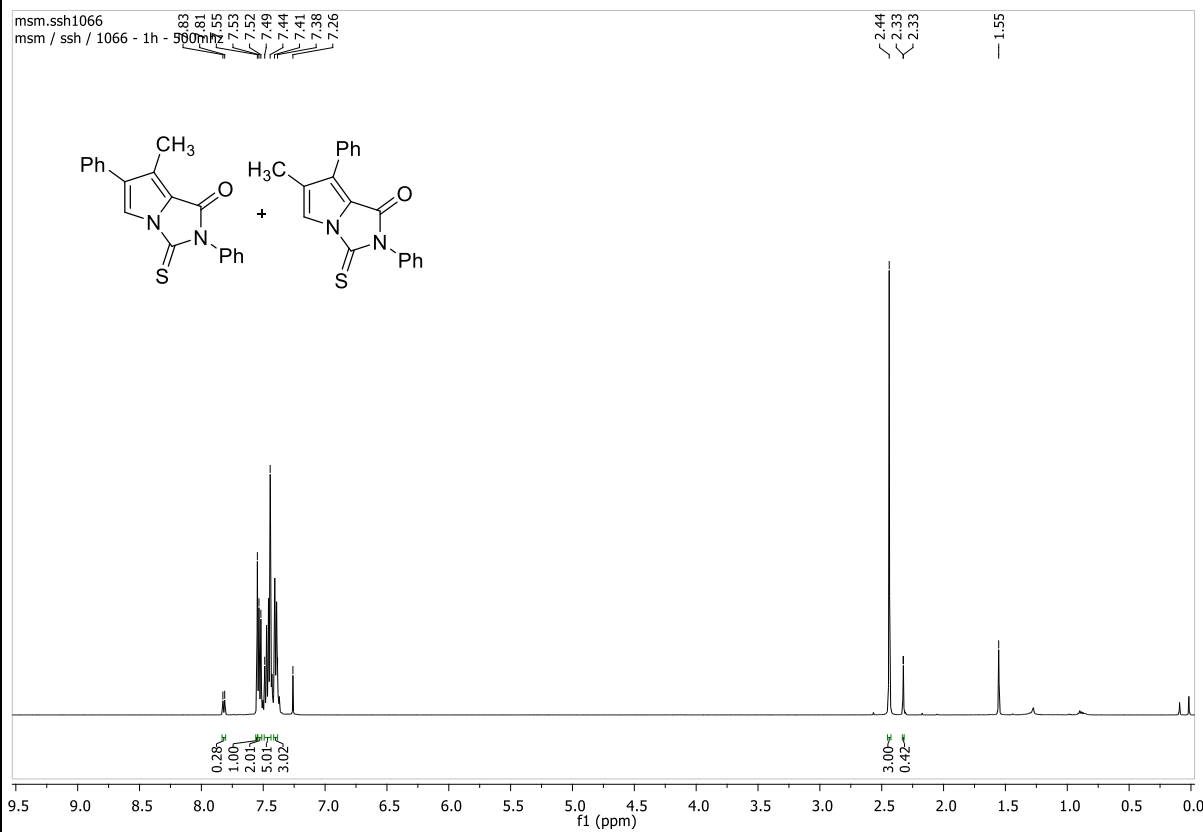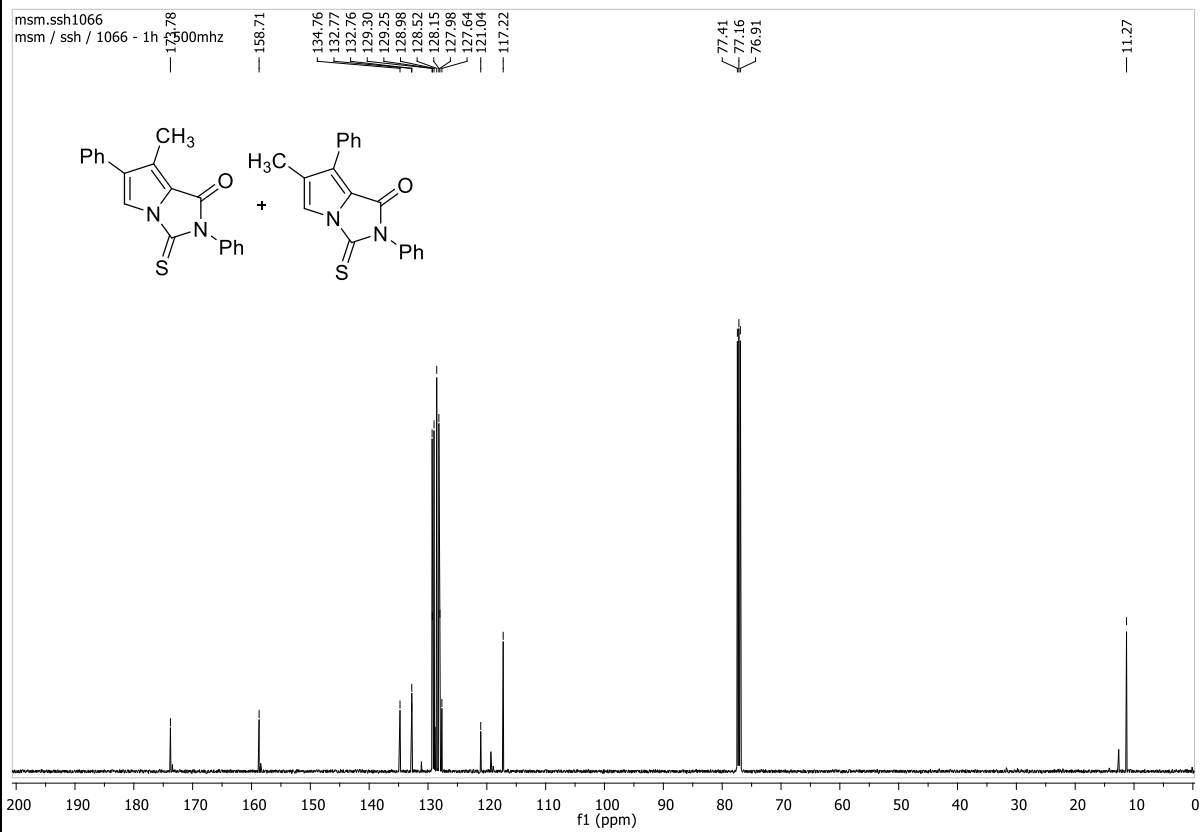

# <sup>1</sup>H NMR and <sup>13</sup>C NMR Spectra of Compound 31

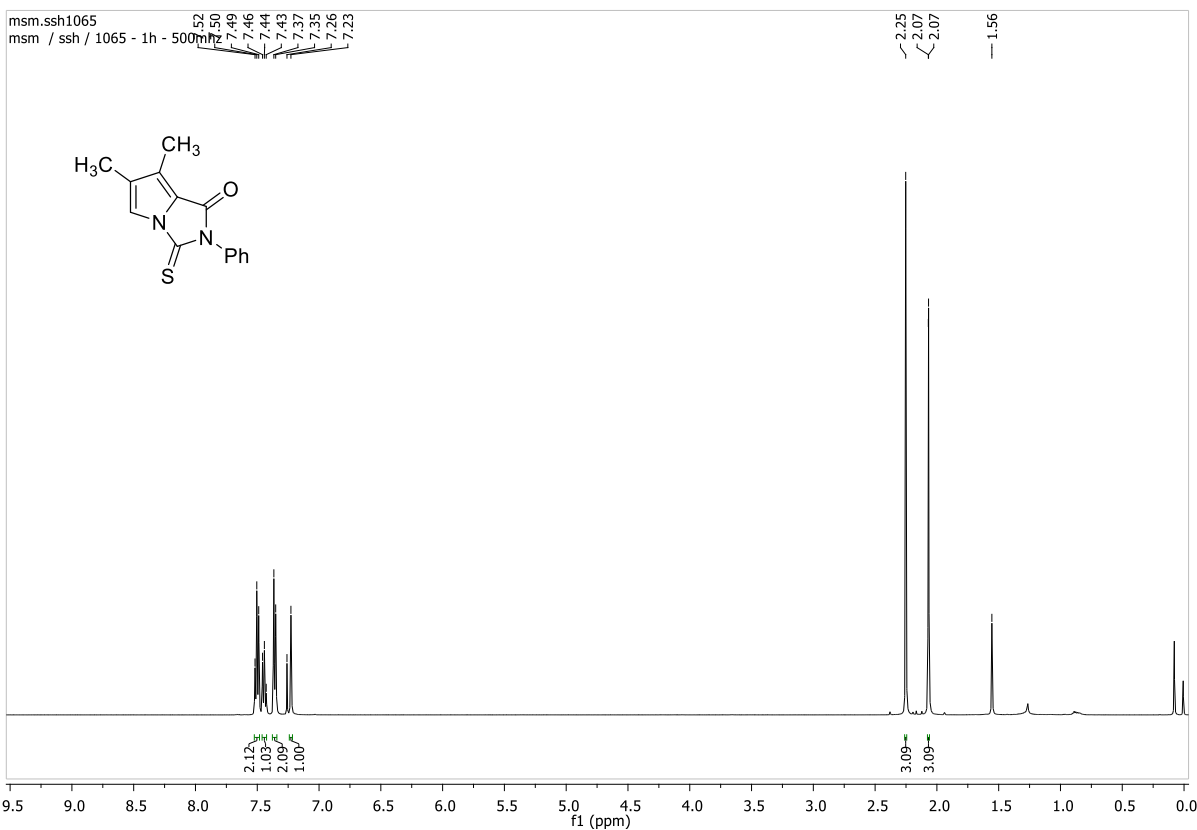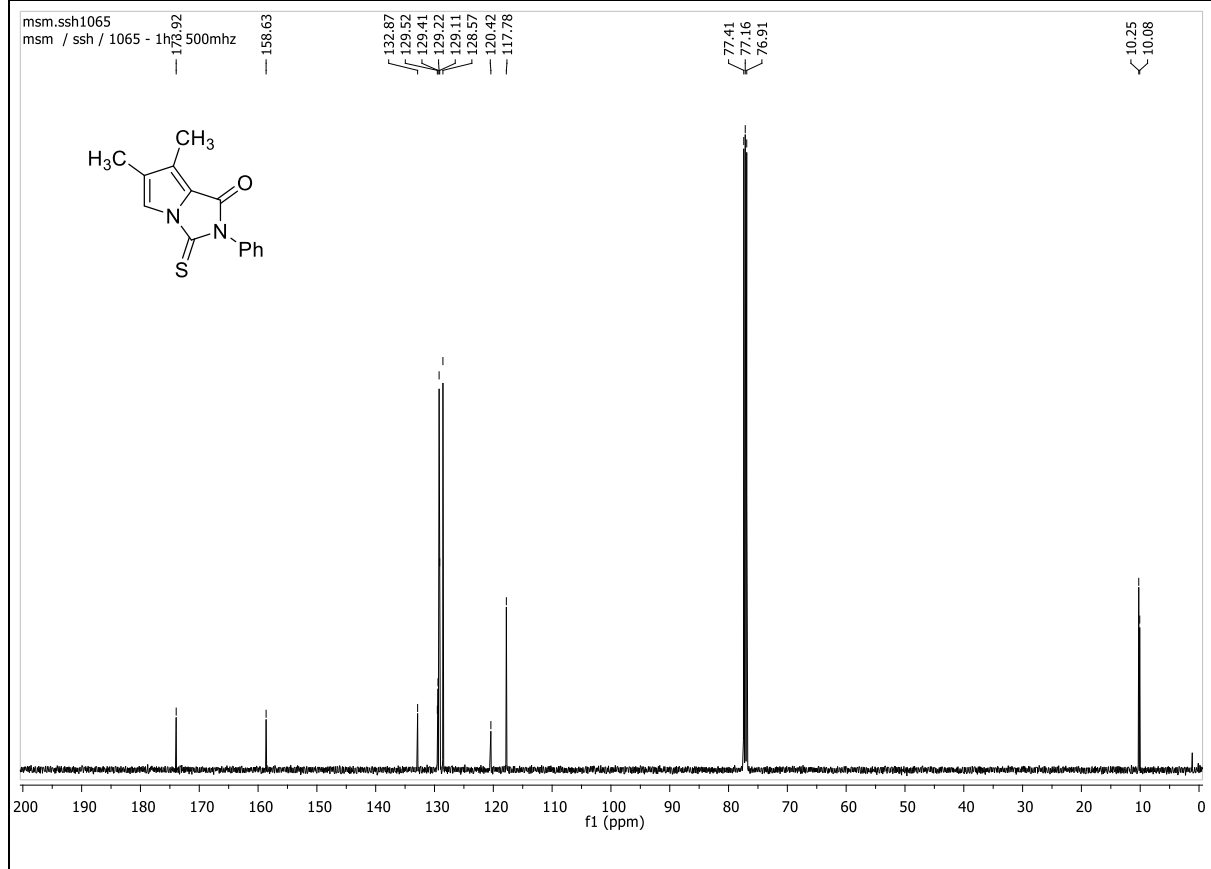

# $^1\text{H}$ NMR and $^{13}\text{C}$ NMR Spectra of Compound **3m**

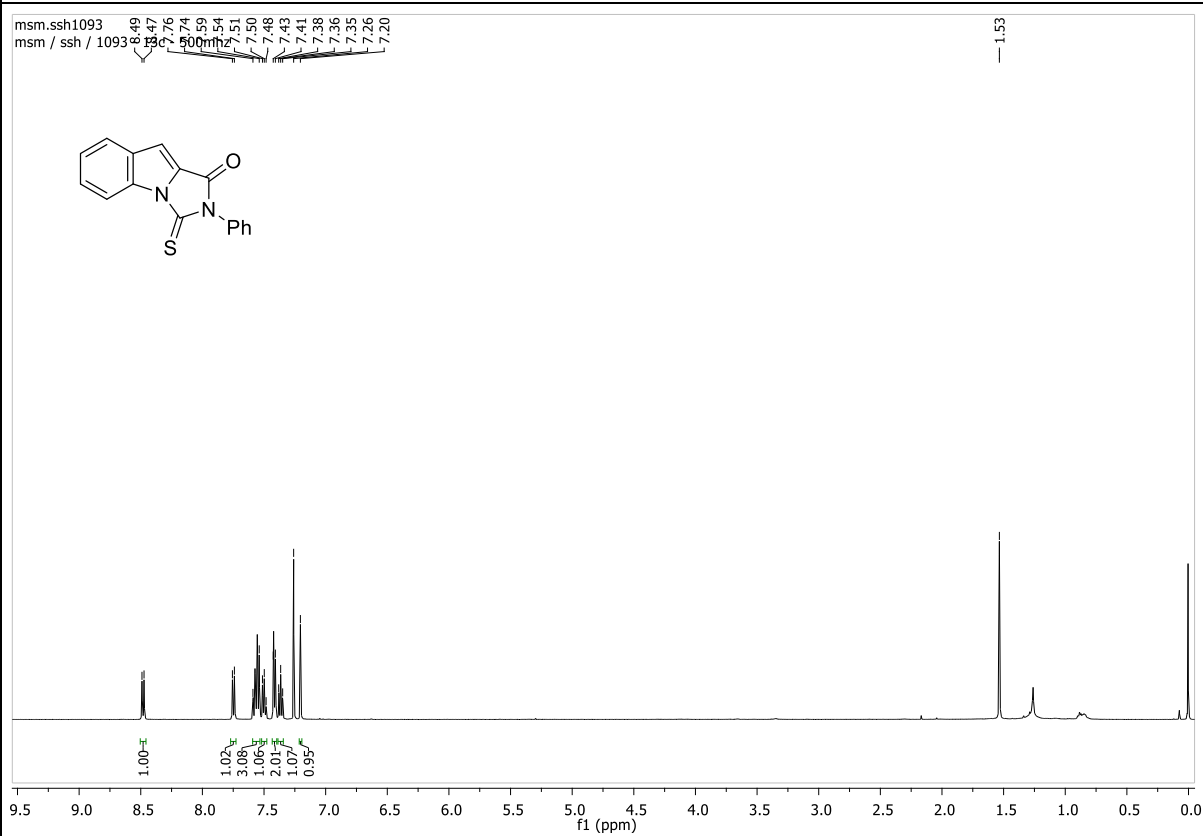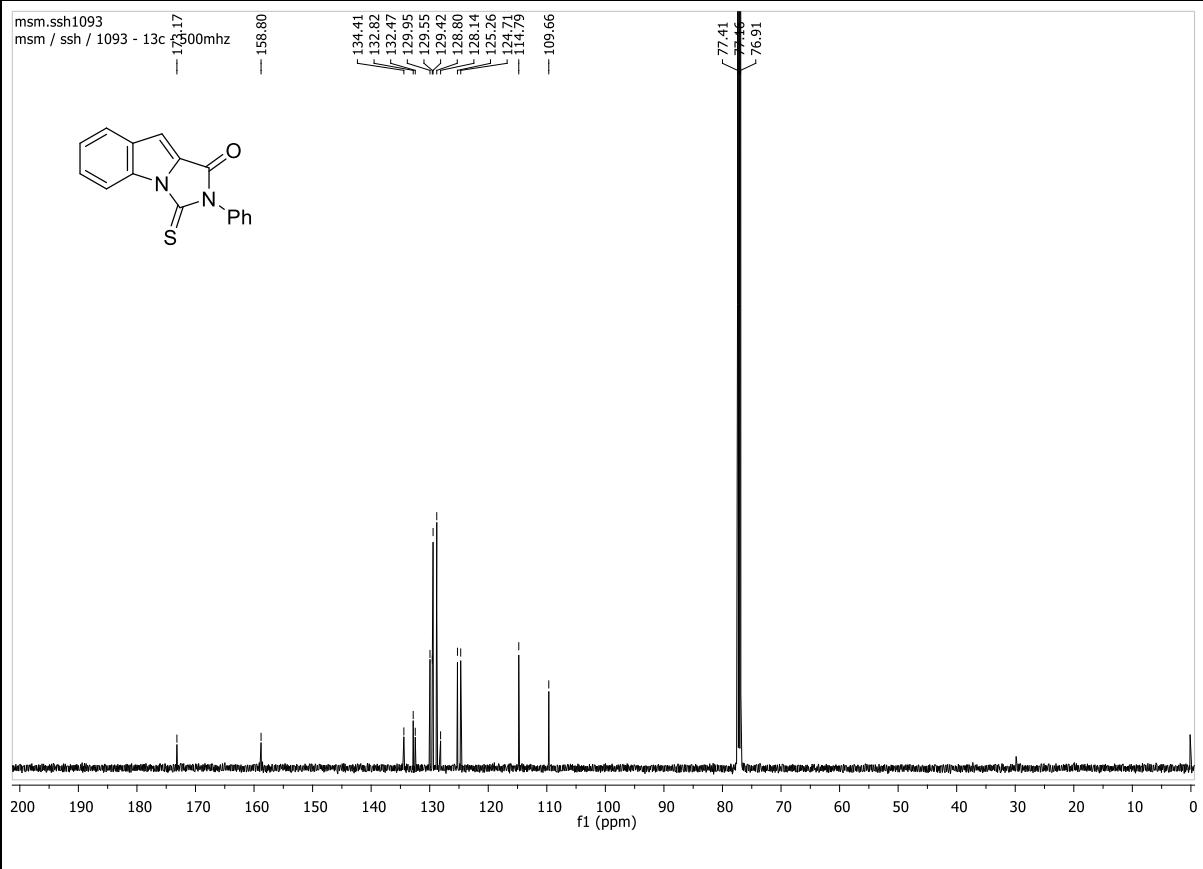

# <sup>1</sup>H NMR and <sup>13</sup>C NMR Spectra of Compound 3n

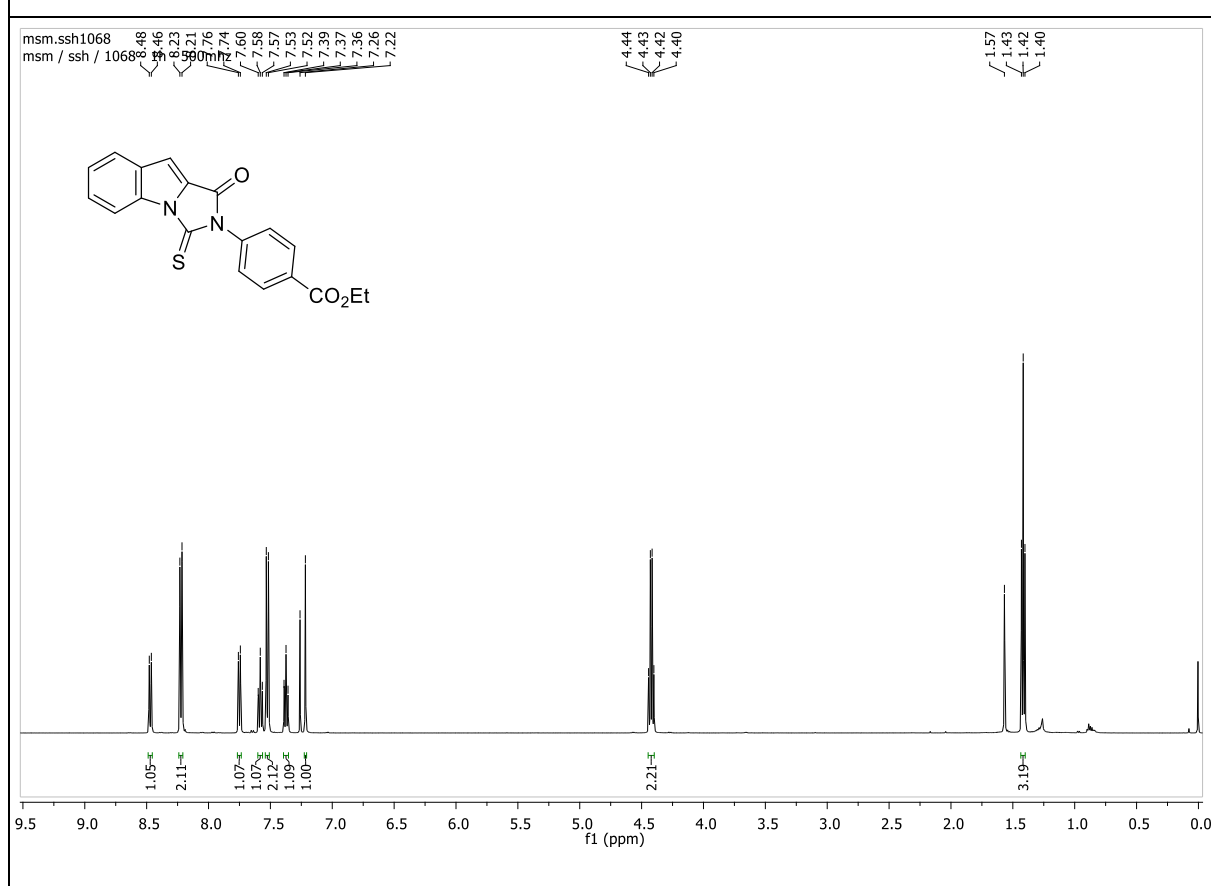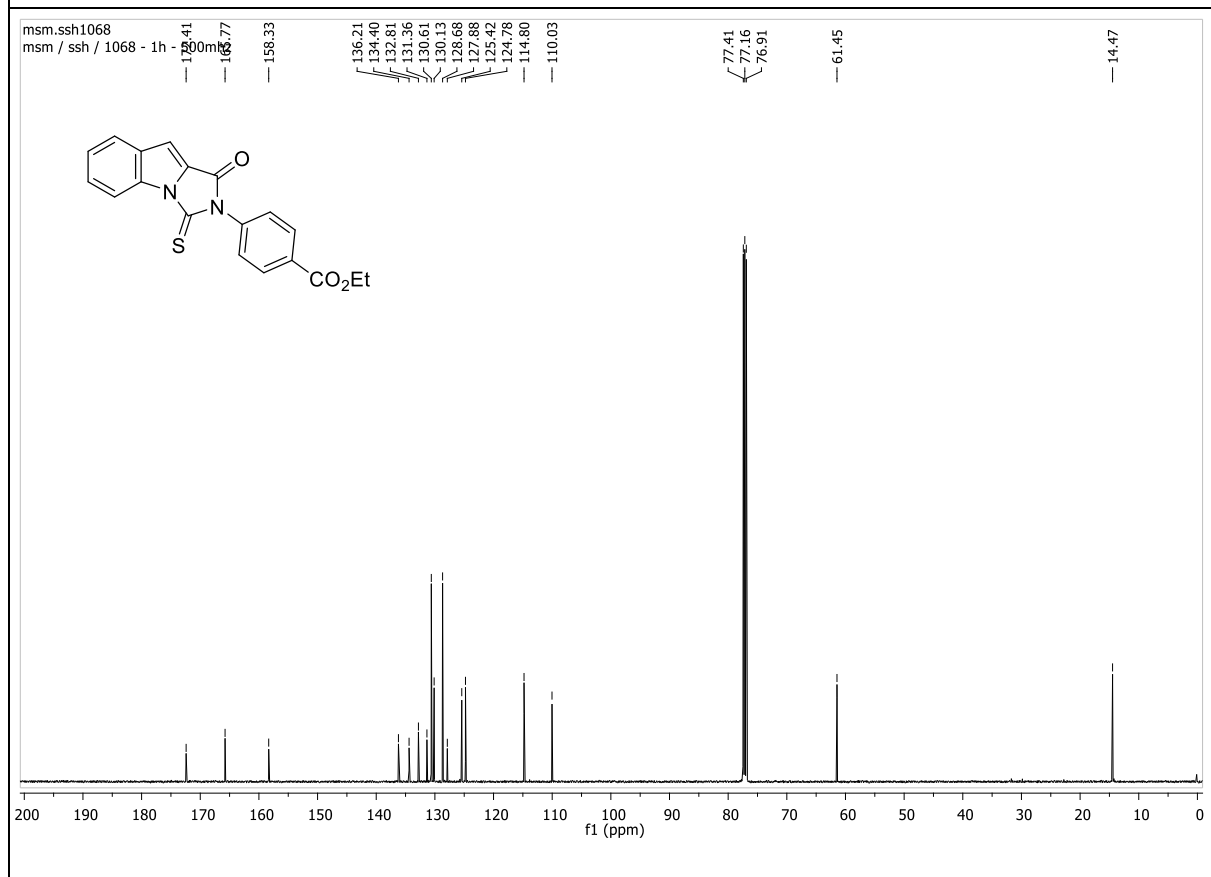

# <sup>1</sup>H NMR and <sup>13</sup>C NMR Spectra of Compound 4a

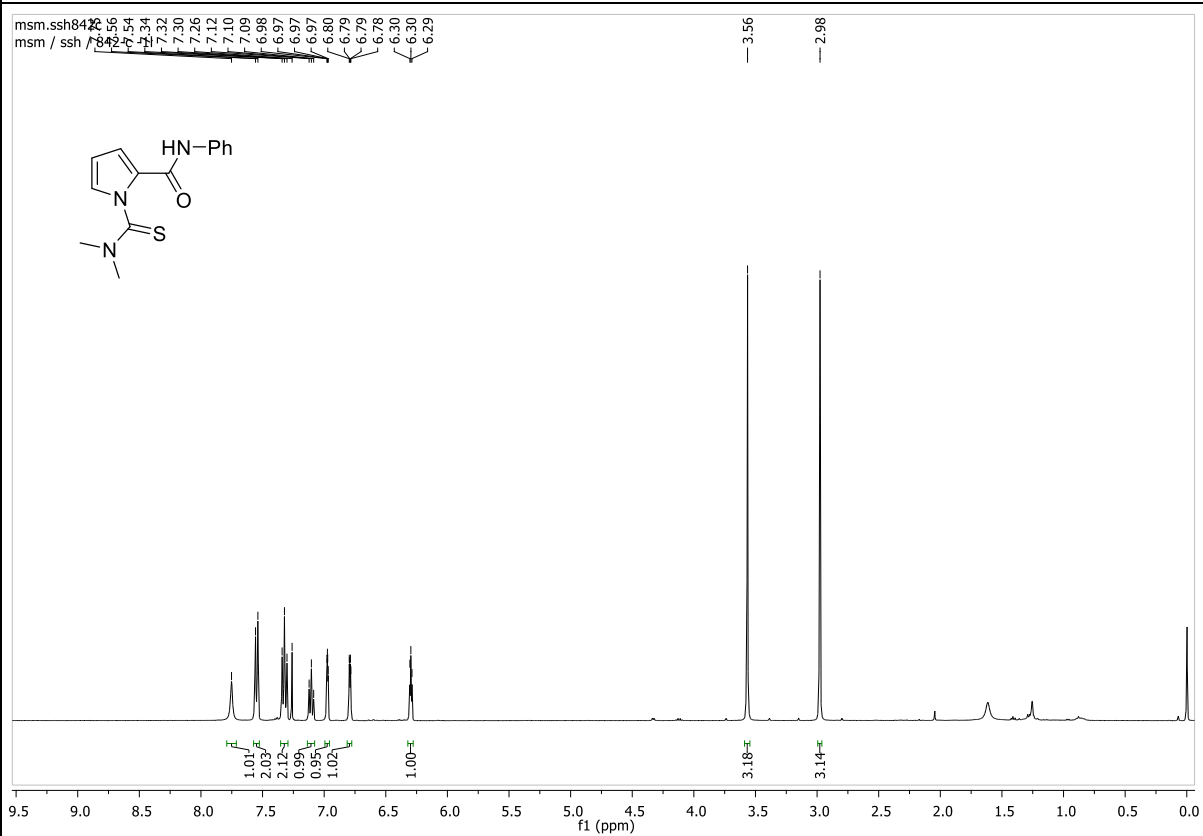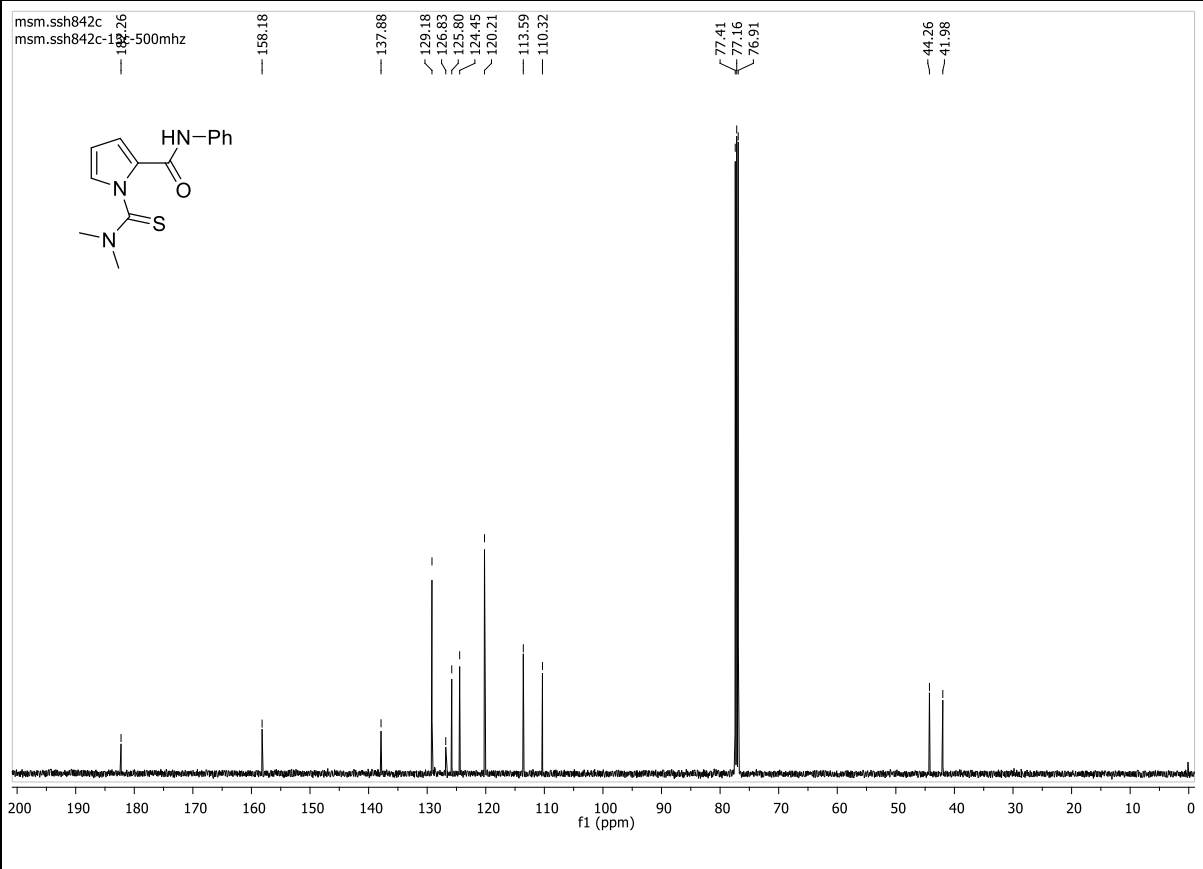

# <sup>1</sup>H NMR and <sup>13</sup>C NMR Spectra of Compound 4b

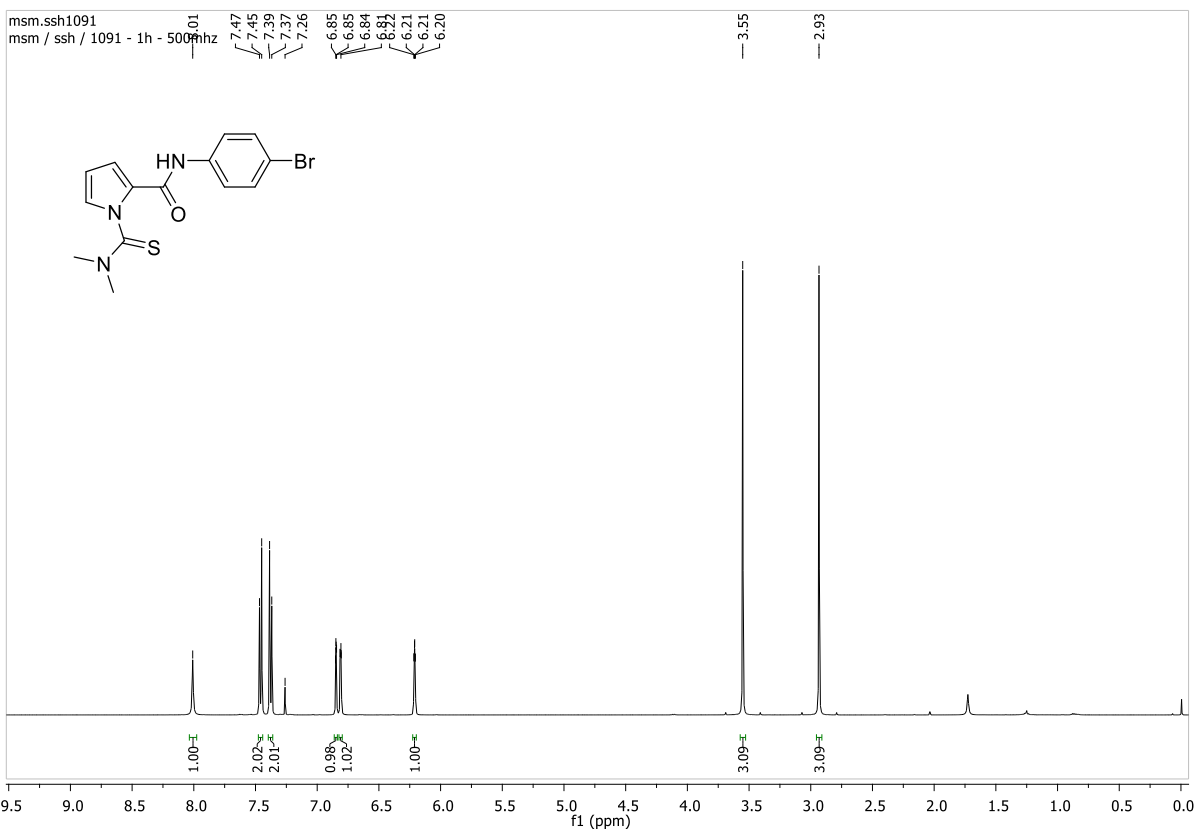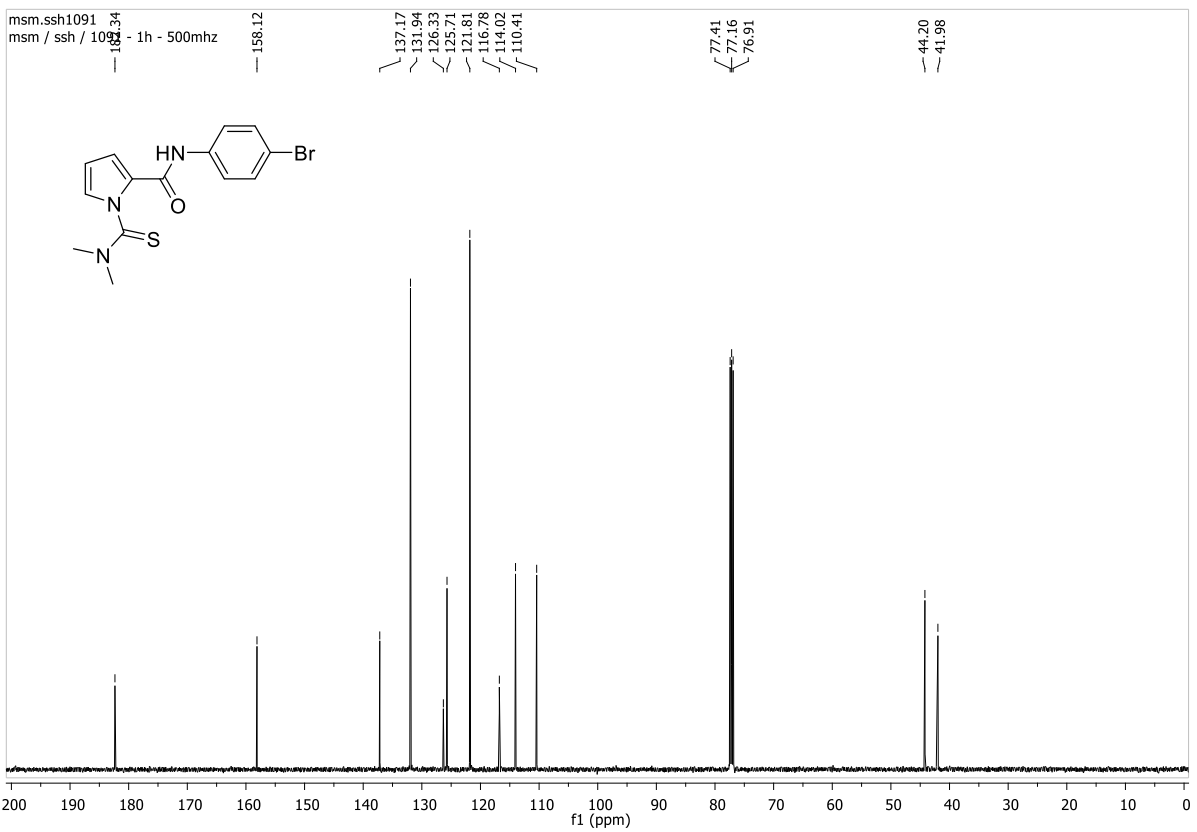

# <sup>1</sup>H NMR and <sup>13</sup>C NMR Spectra of Compound 4c

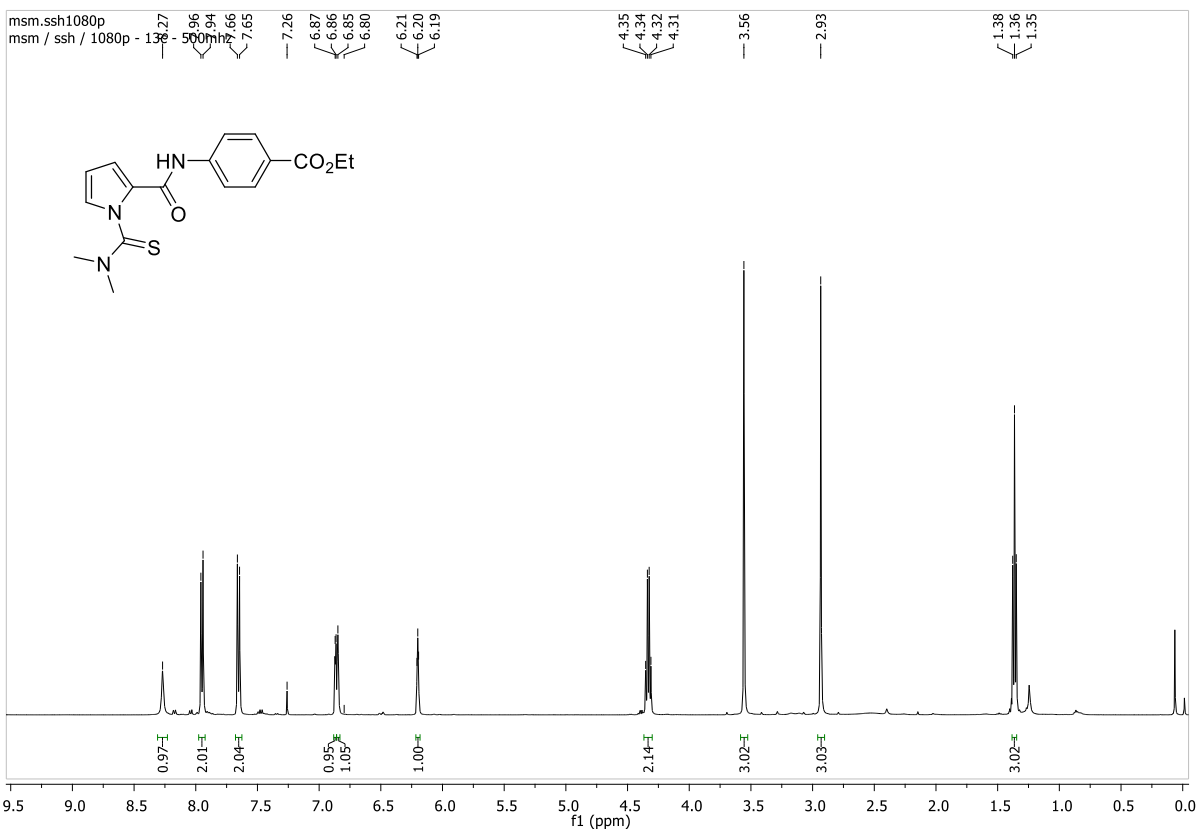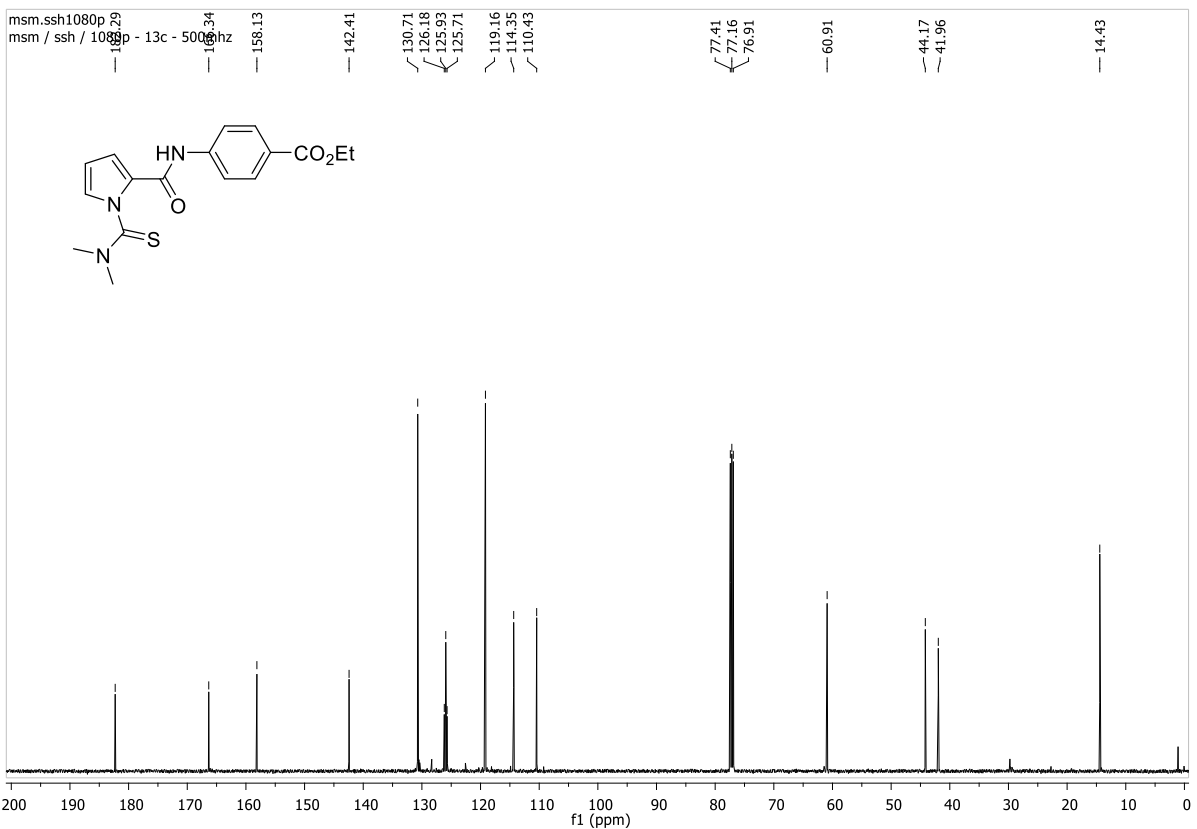

# $^1\text{H}$ NMR and $^{13}\text{C}$ NMR Spectra of Compound **4d**

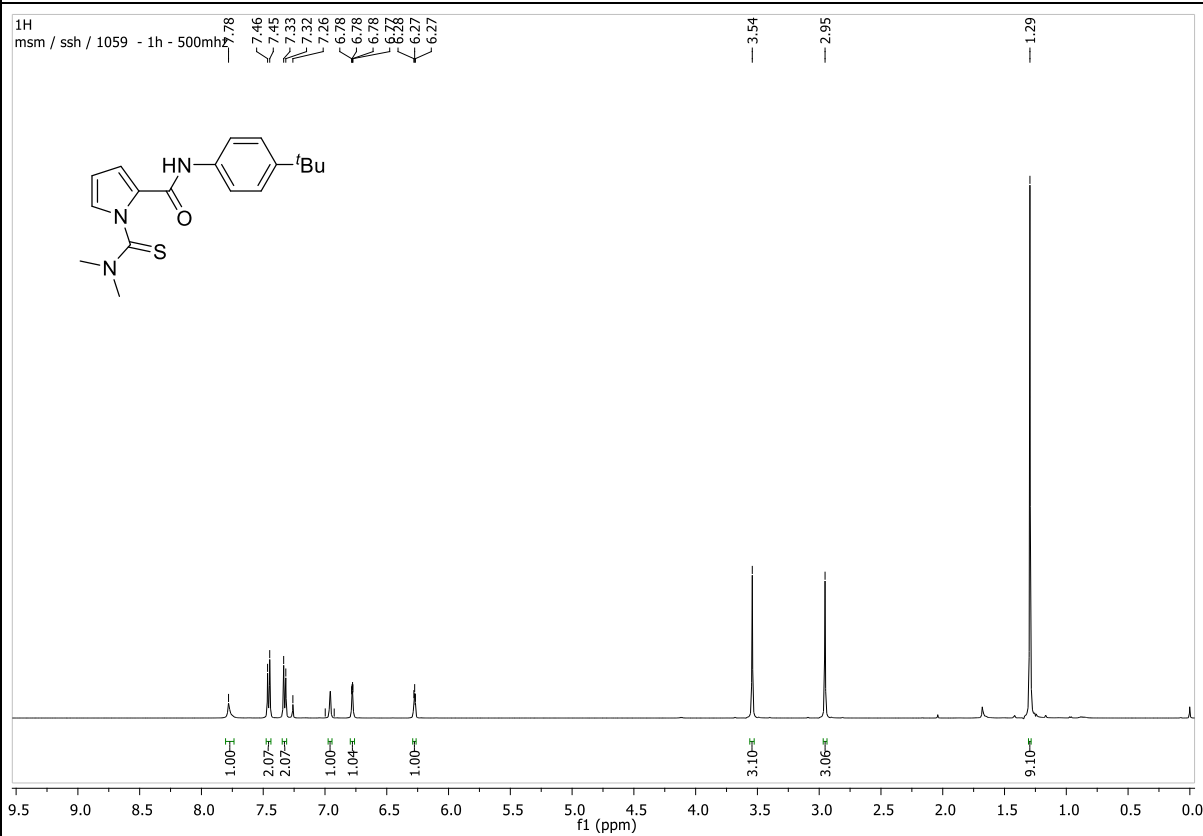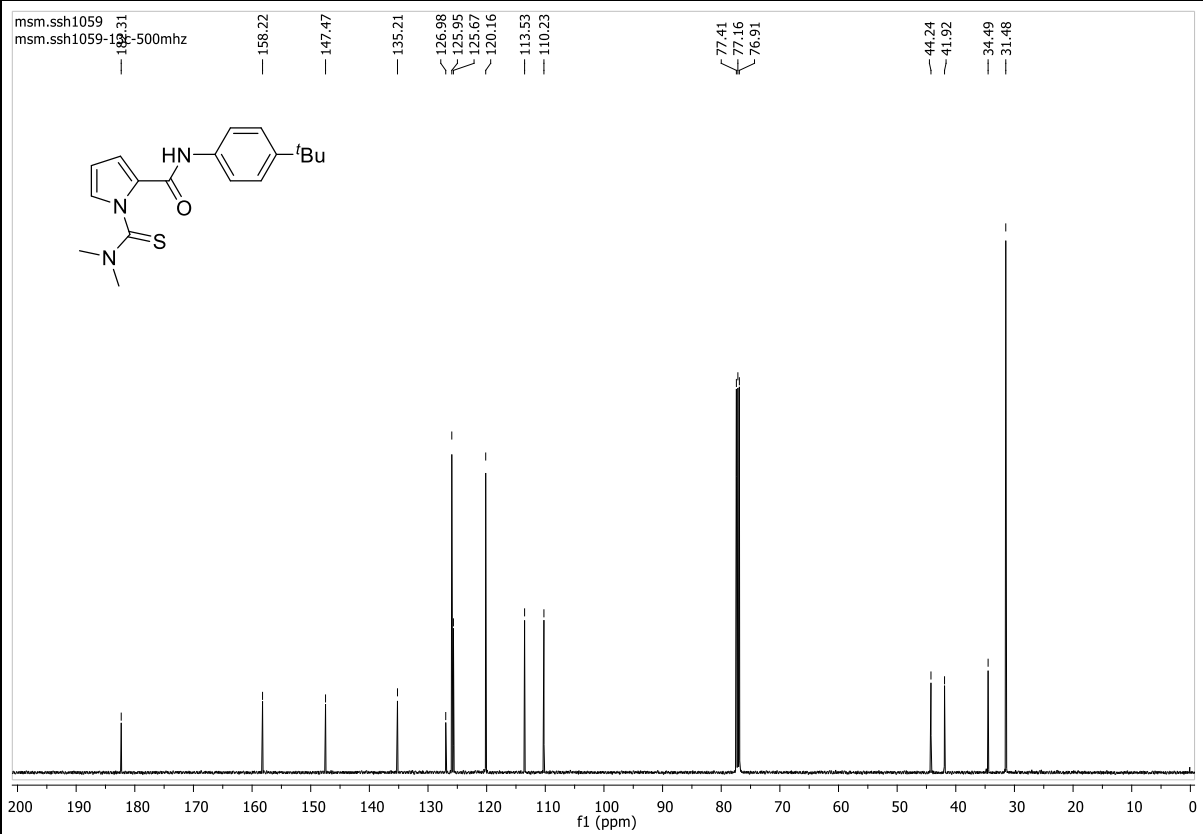



# <sup>1</sup>H NMR and <sup>13</sup>C NMR Spectra of Compound 4e

msh.ssh1025a  
msh / ssh / 1025-a -1h -400Mhz

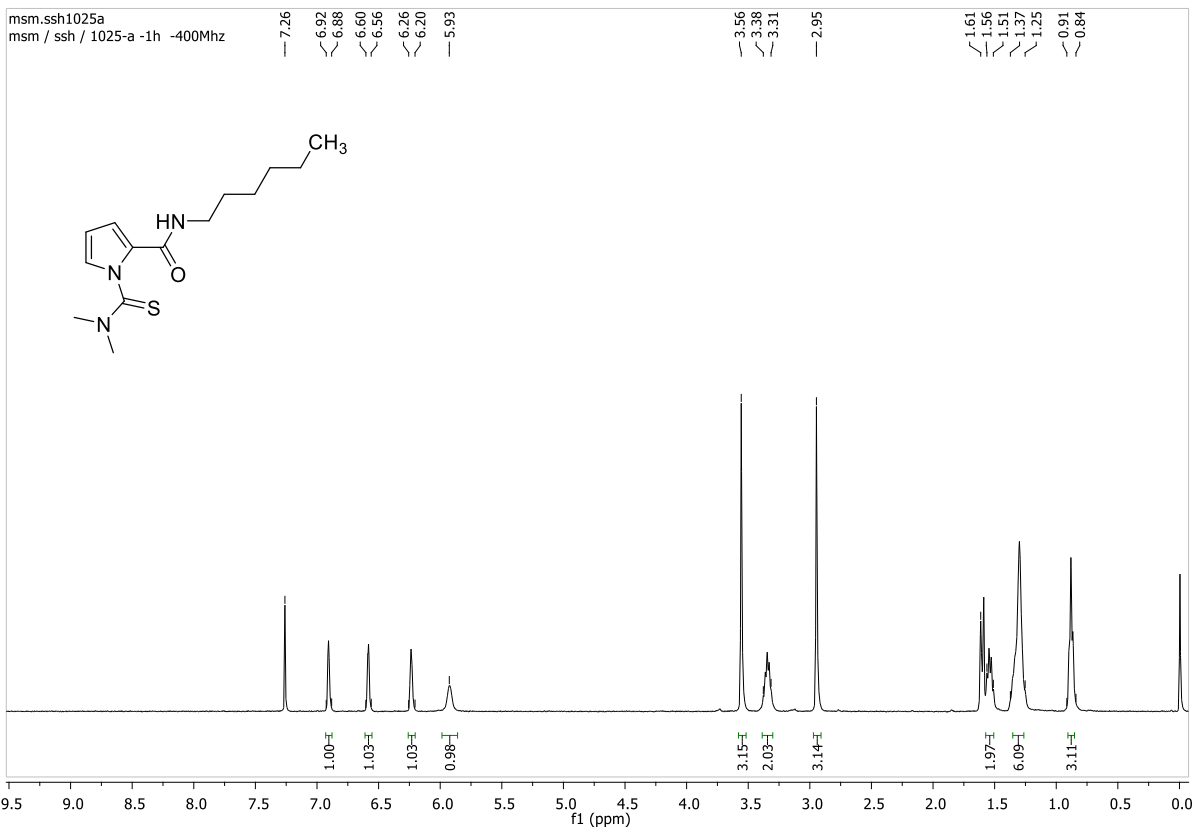

msh.ssh1025  
msh / ssh / 1025 - 13c - 500mhz

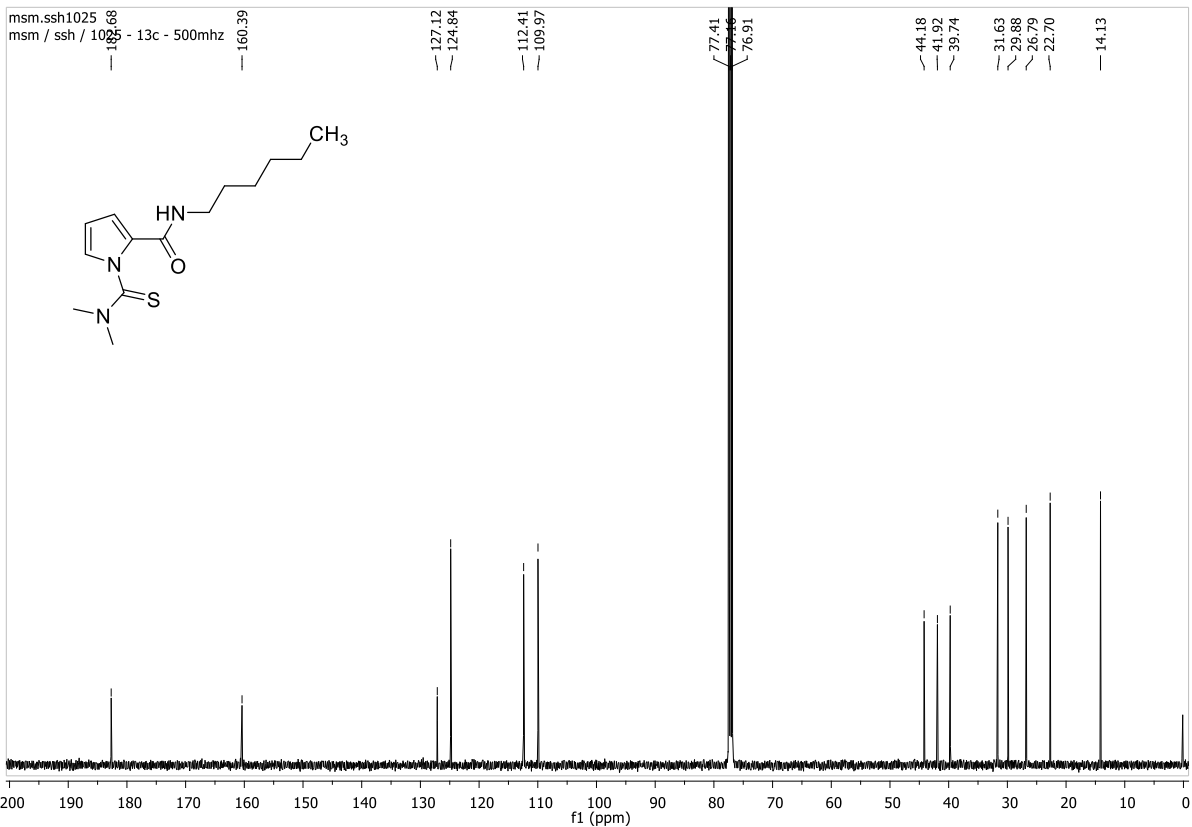

# <sup>1</sup>H NMR and <sup>13</sup>C NMR Spectra of Compound 4f

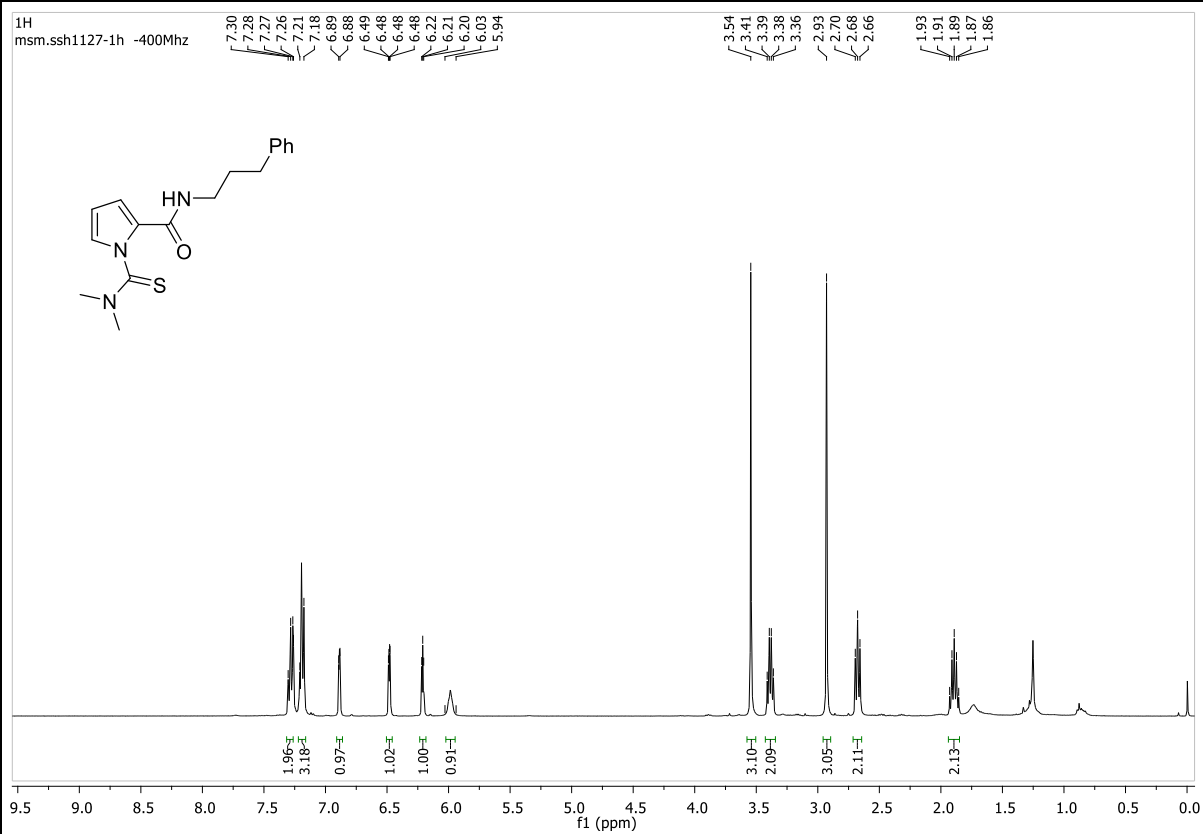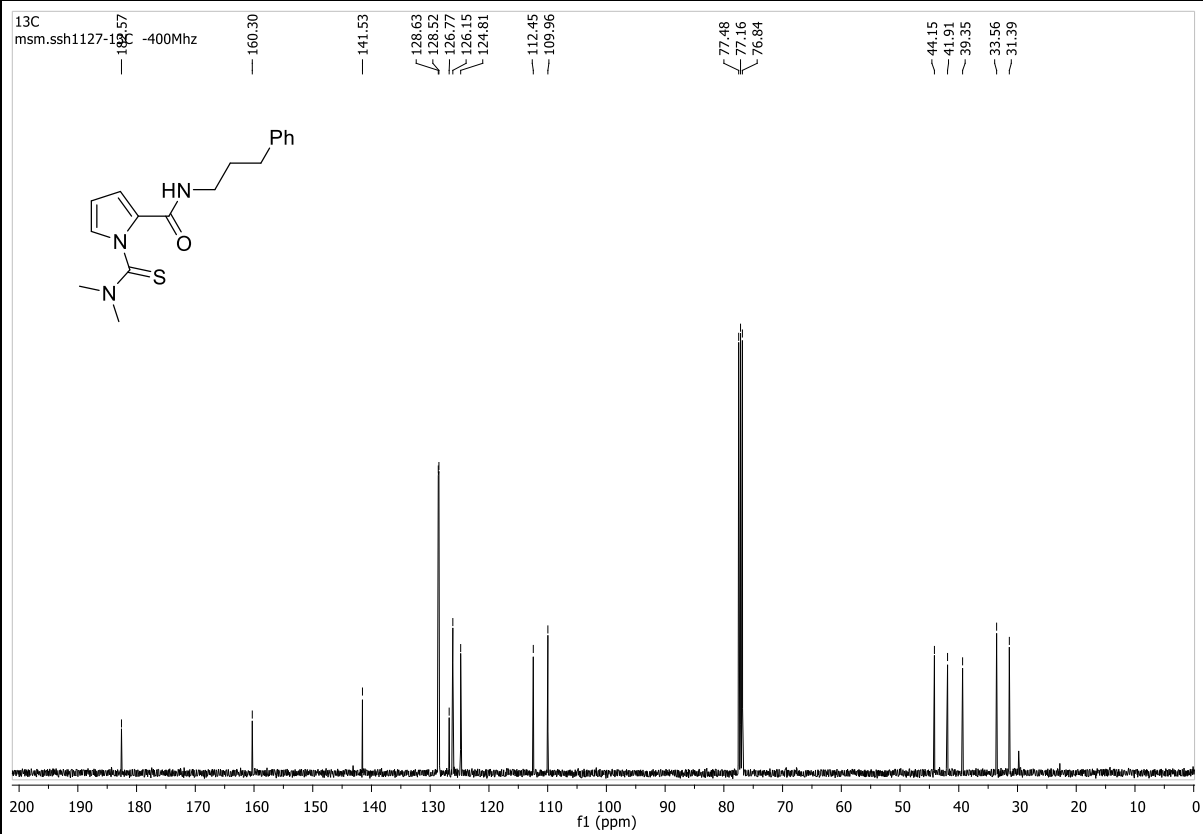

# $^1\text{H}$ NMR and $^{13}\text{C}$ NMR Spectra of Compound **4g**

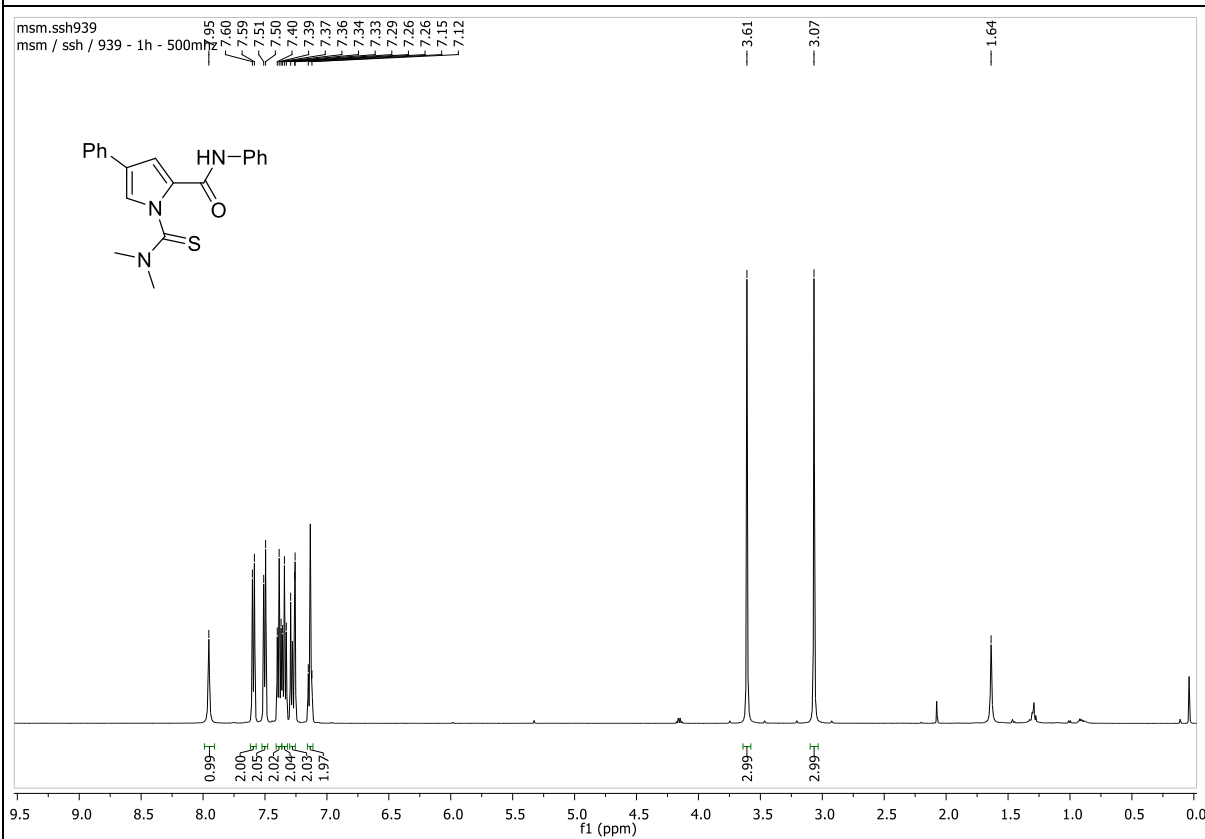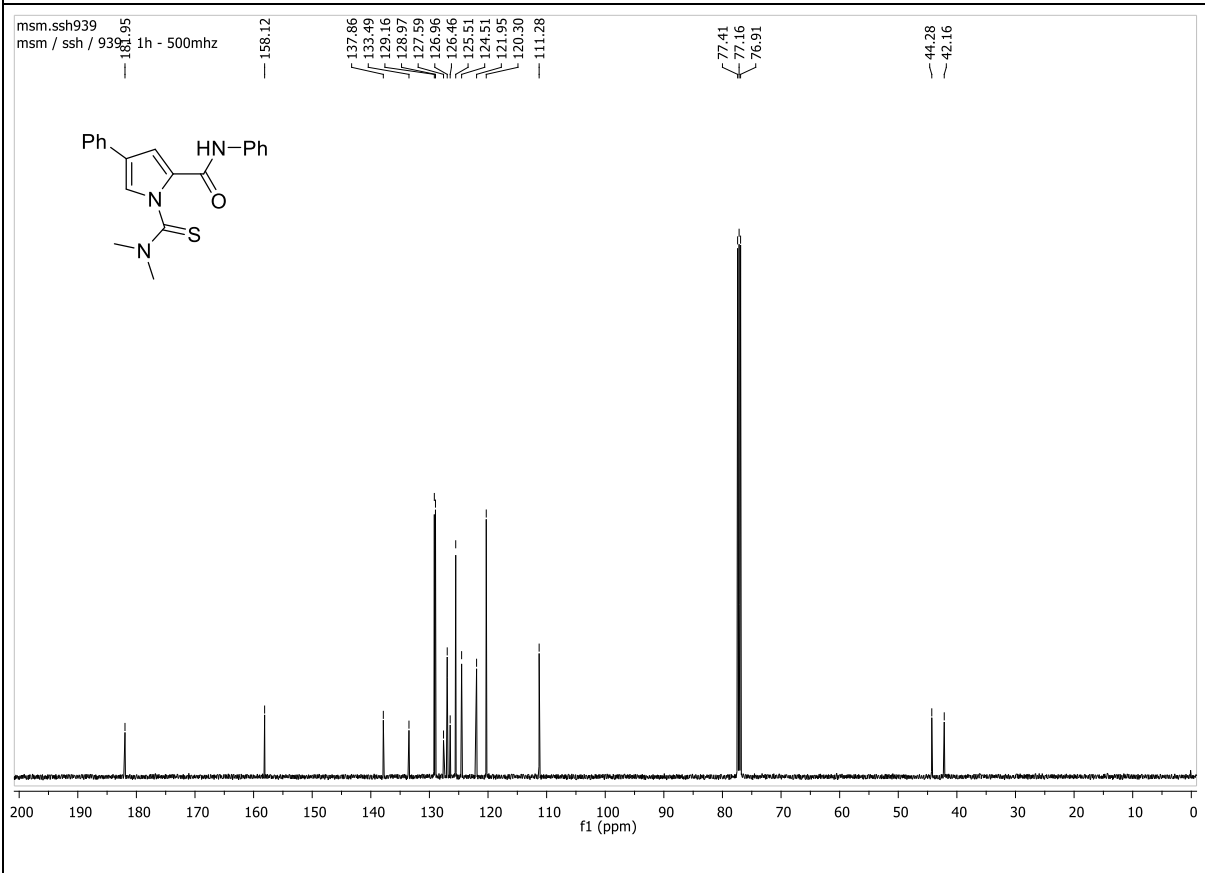

# <sup>1</sup>H NMR and <sup>13</sup>C NMR Spectra of Compound 4h

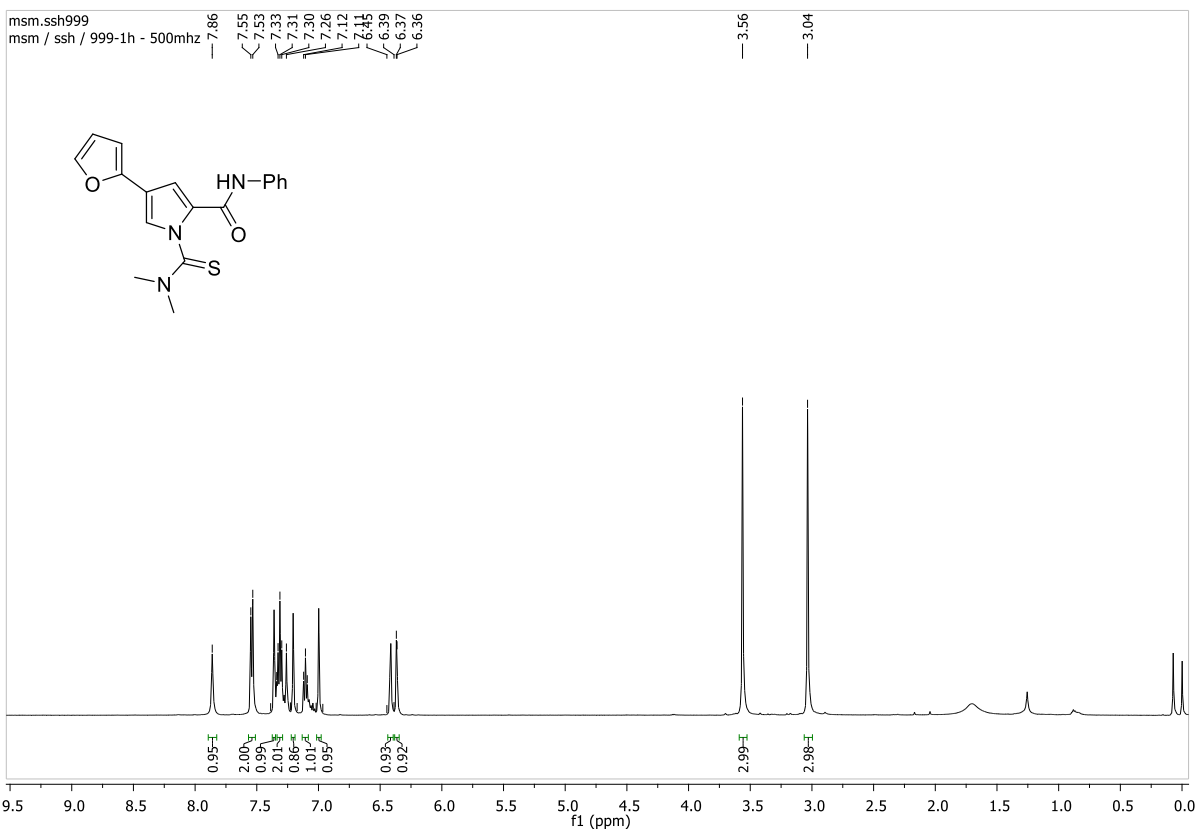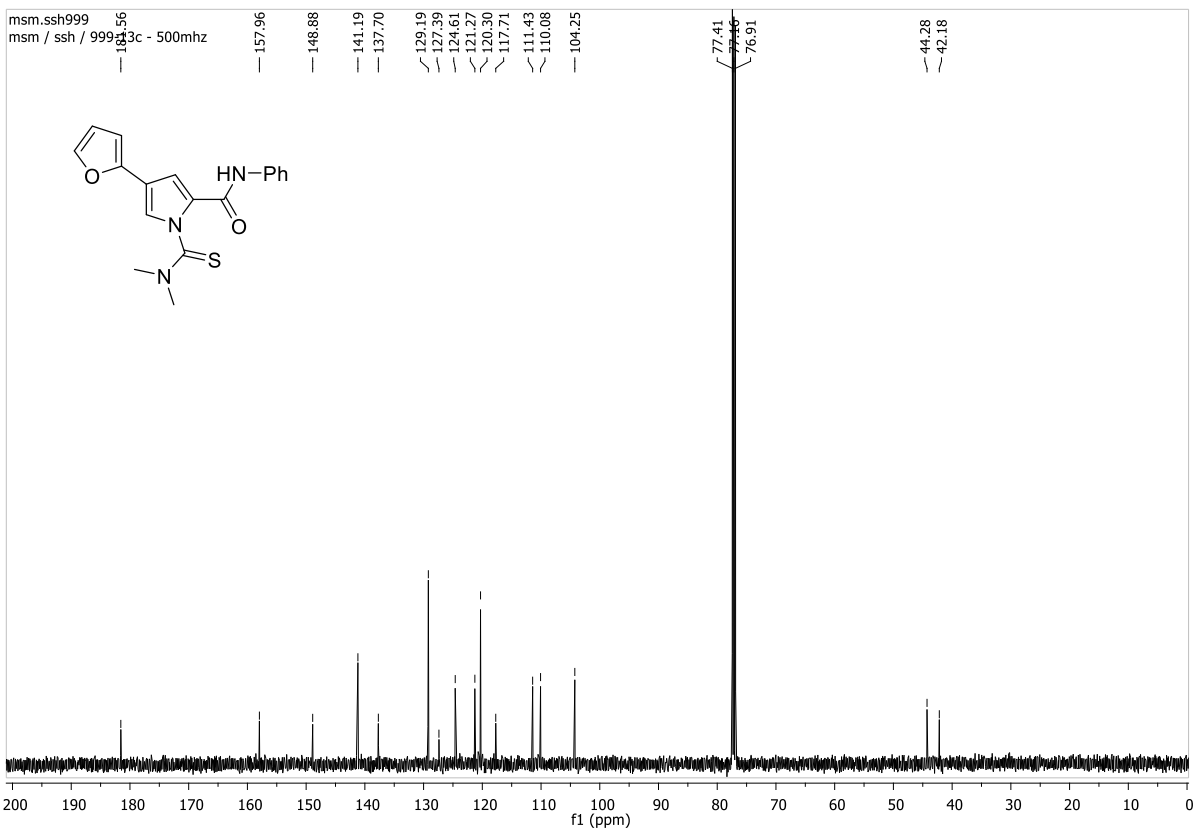

# <sup>1</sup>H NMR and <sup>13</sup>C NMR Spectra of Compound 4i

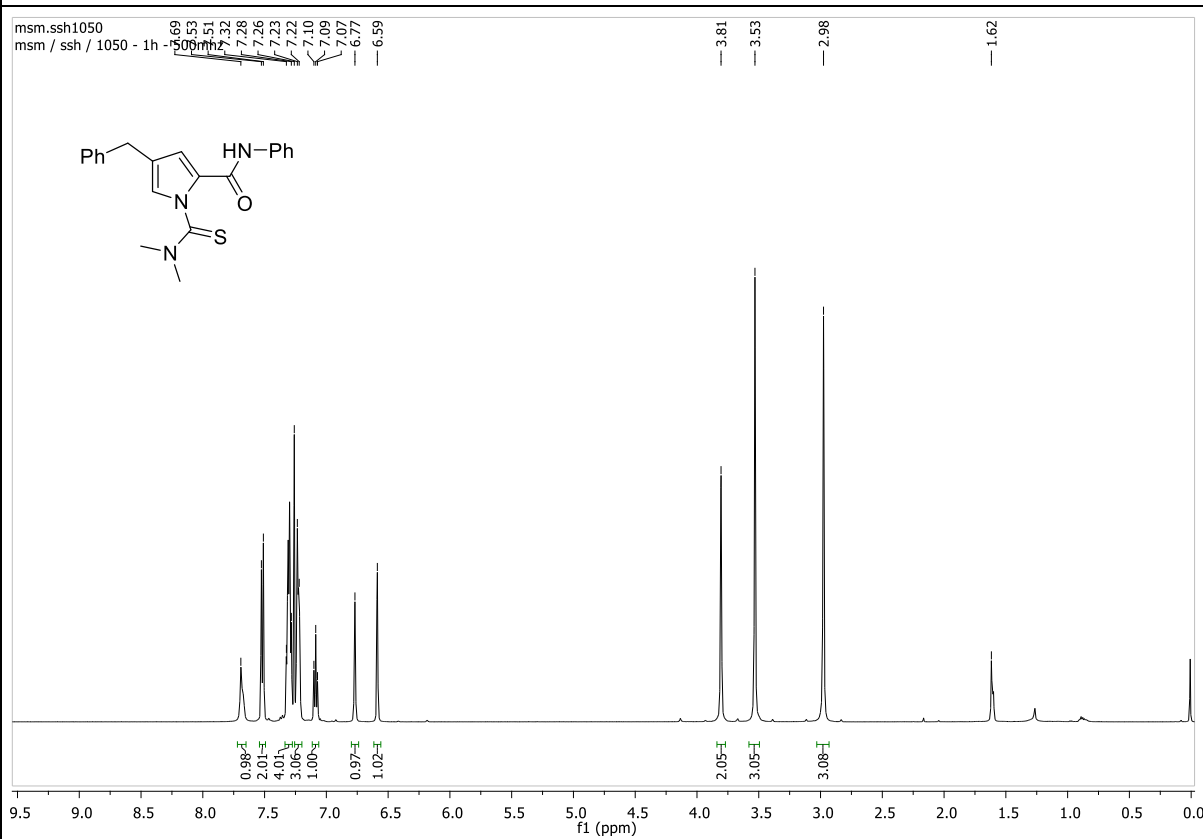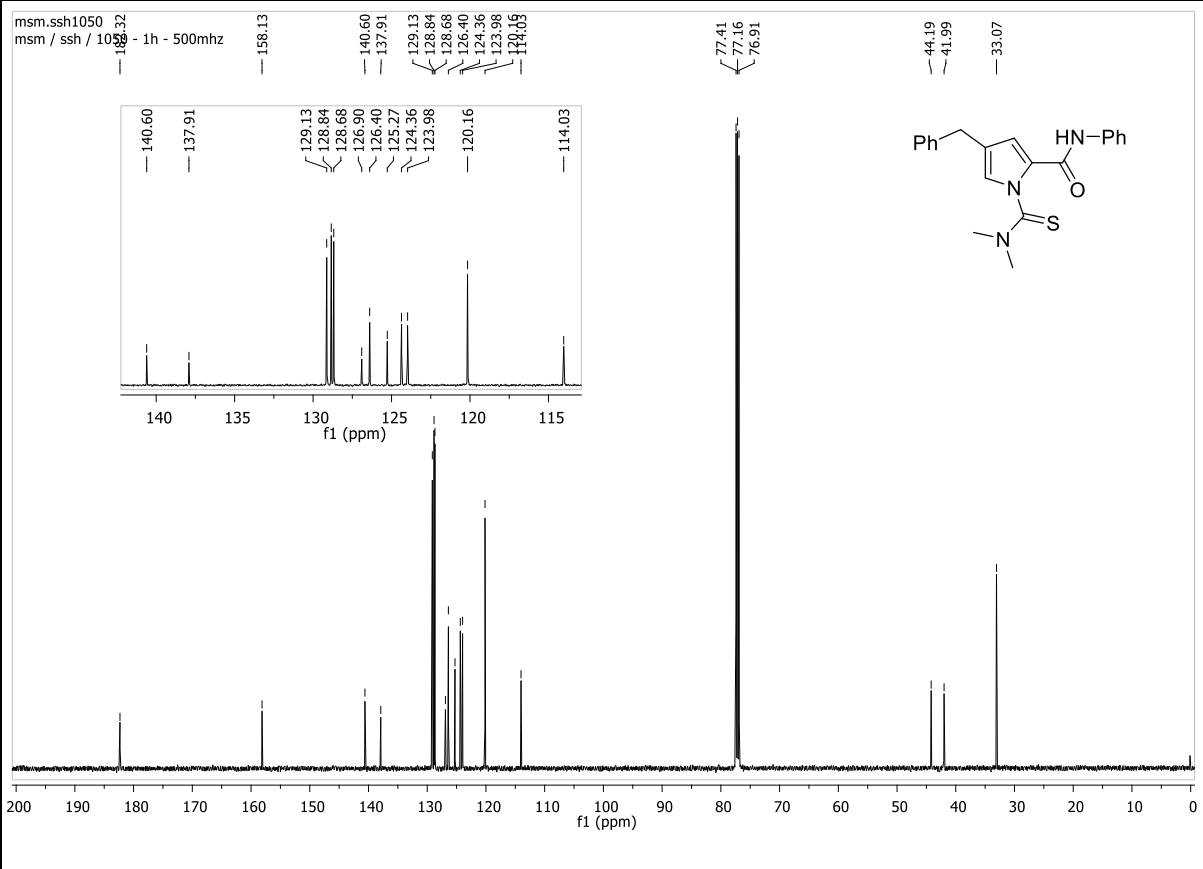

# <sup>1</sup>H NMR and <sup>13</sup>C NMR Spectra of Compound 4j

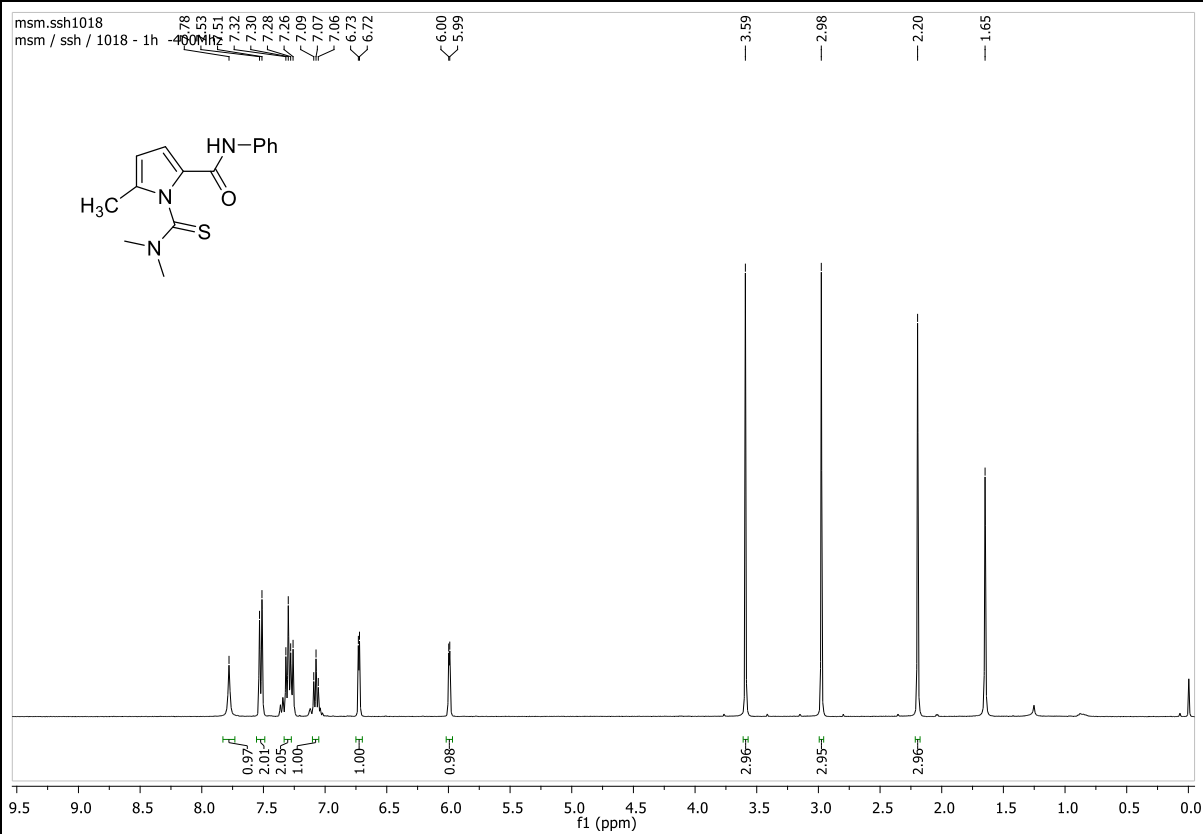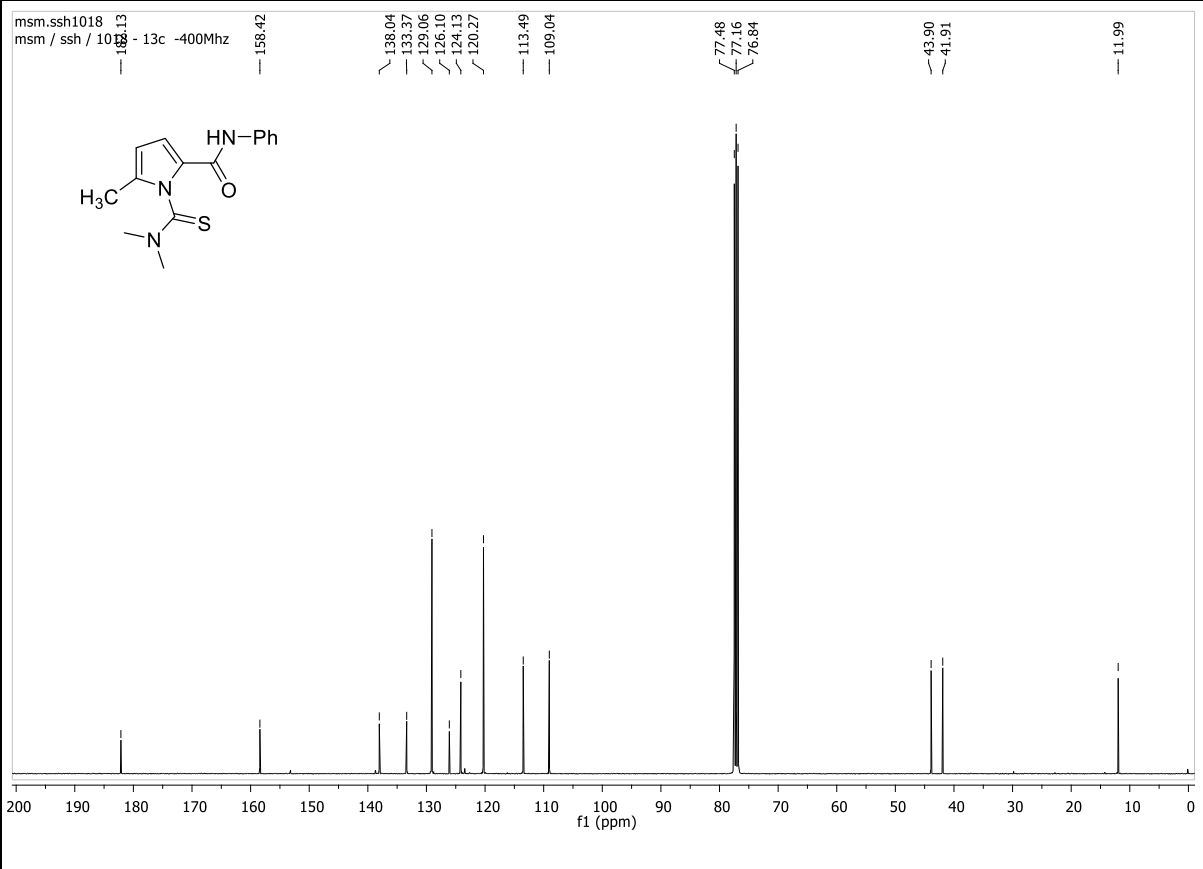

# <sup>1</sup>H NMR and <sup>13</sup>C NMR Spectra of Compound 4k

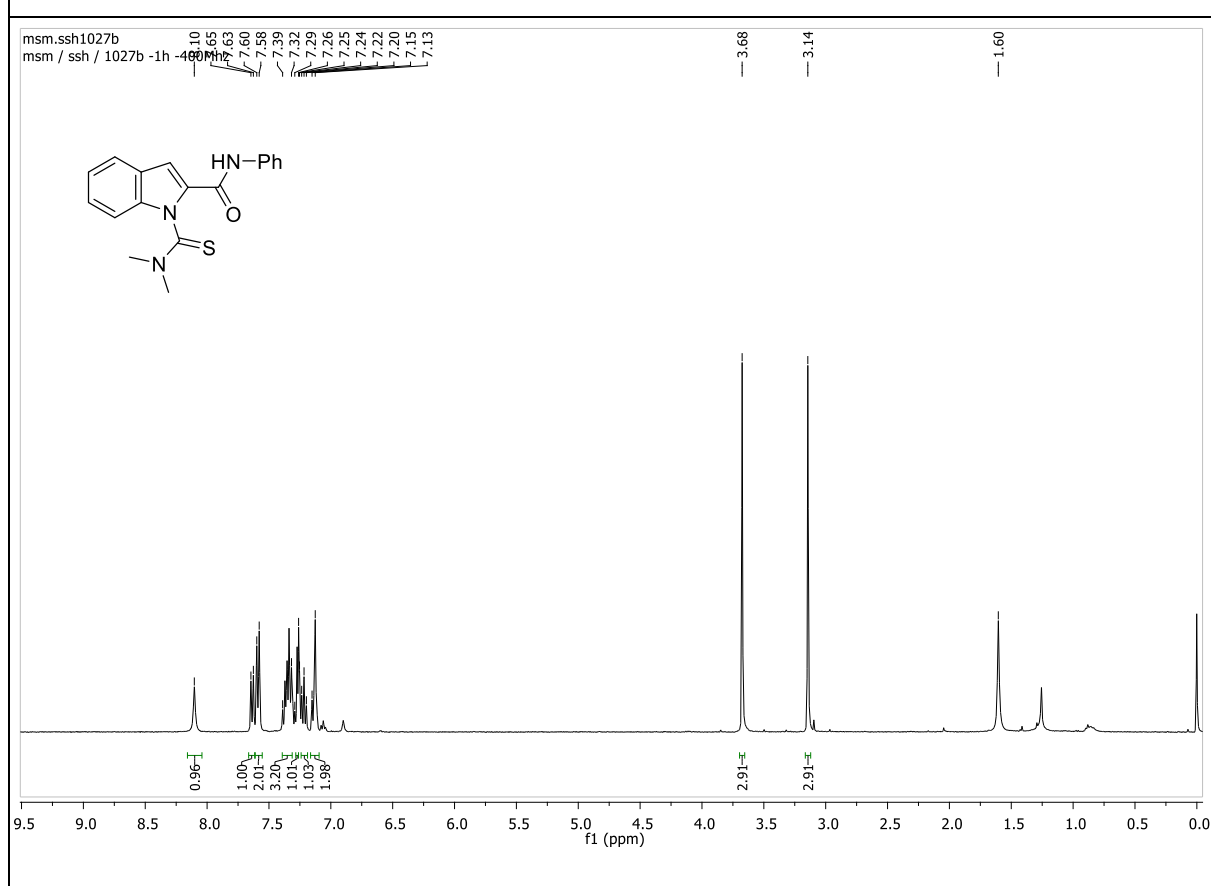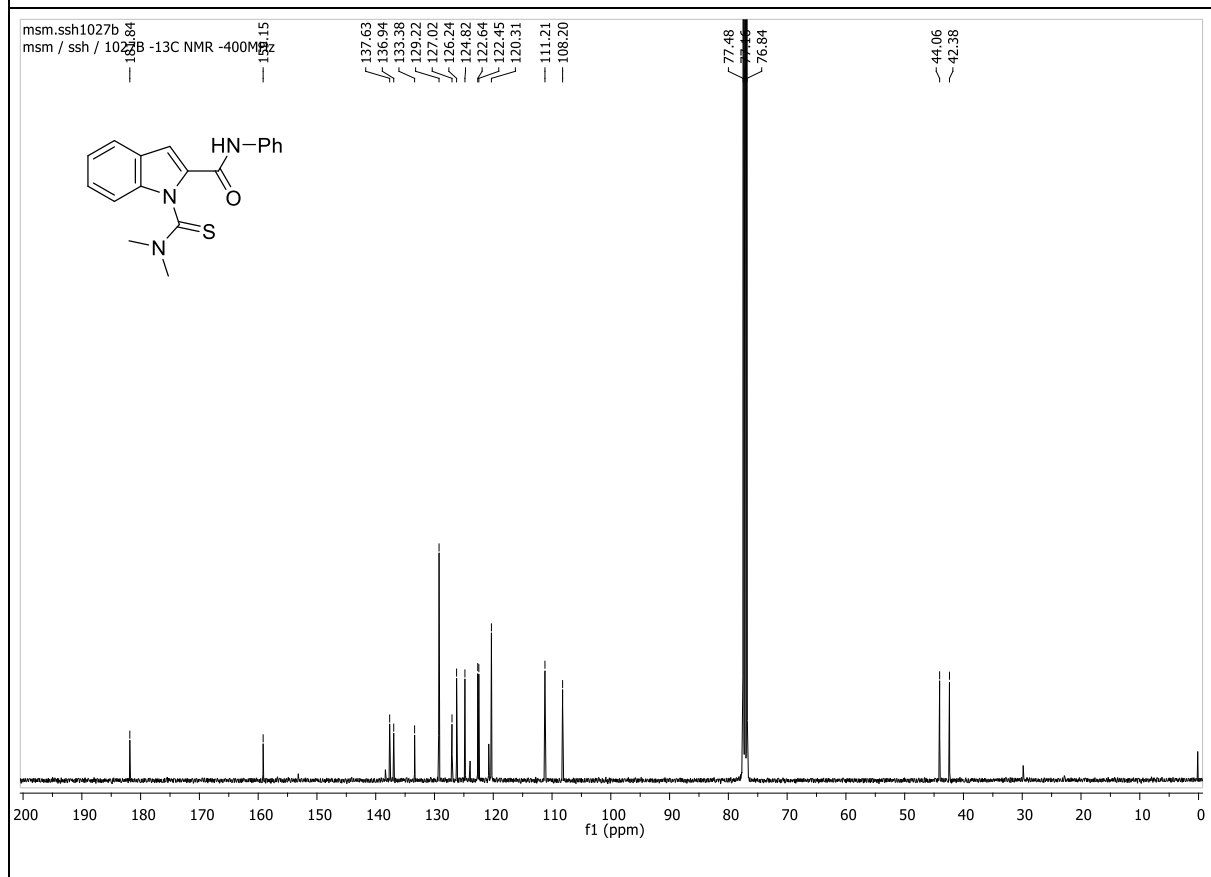

# <sup>1</sup>H NMR and <sup>13</sup>C NMR Spectra of Compound 6a

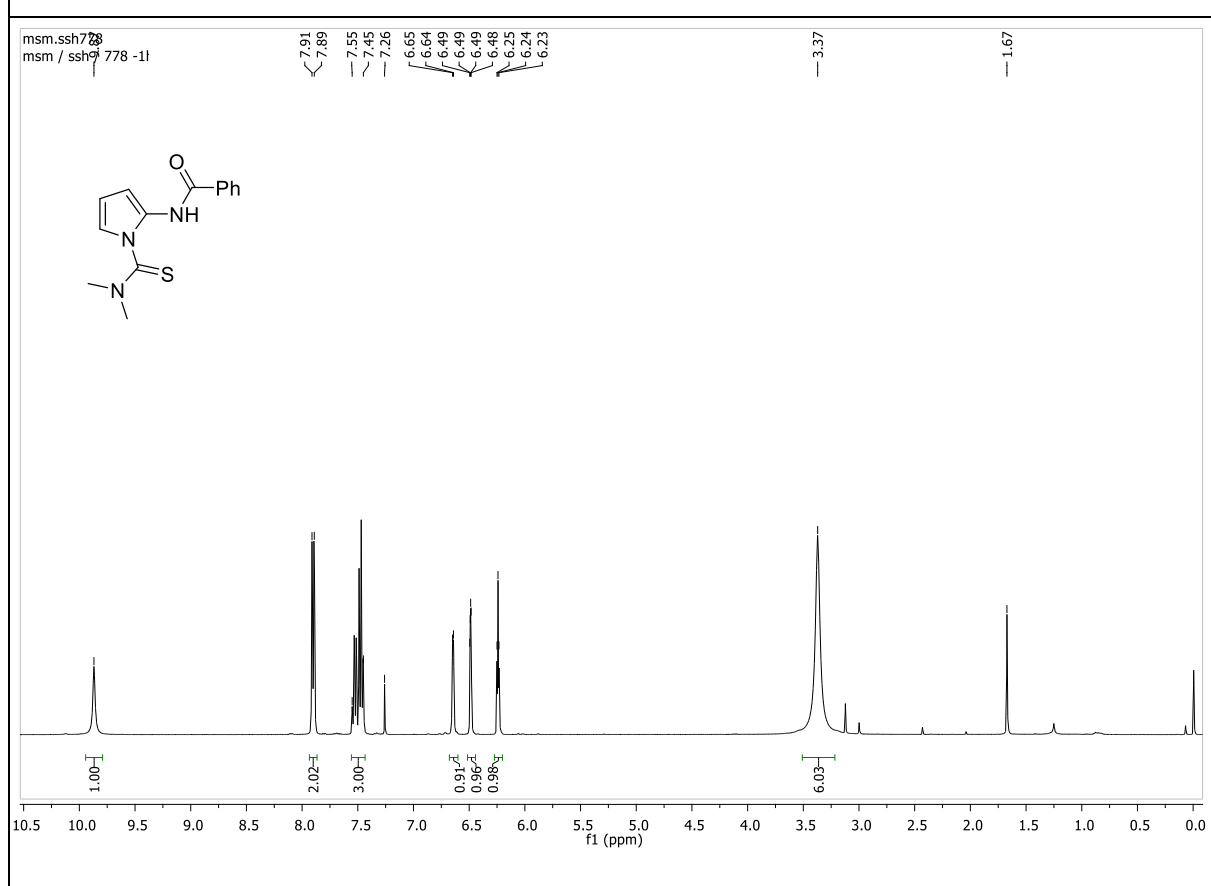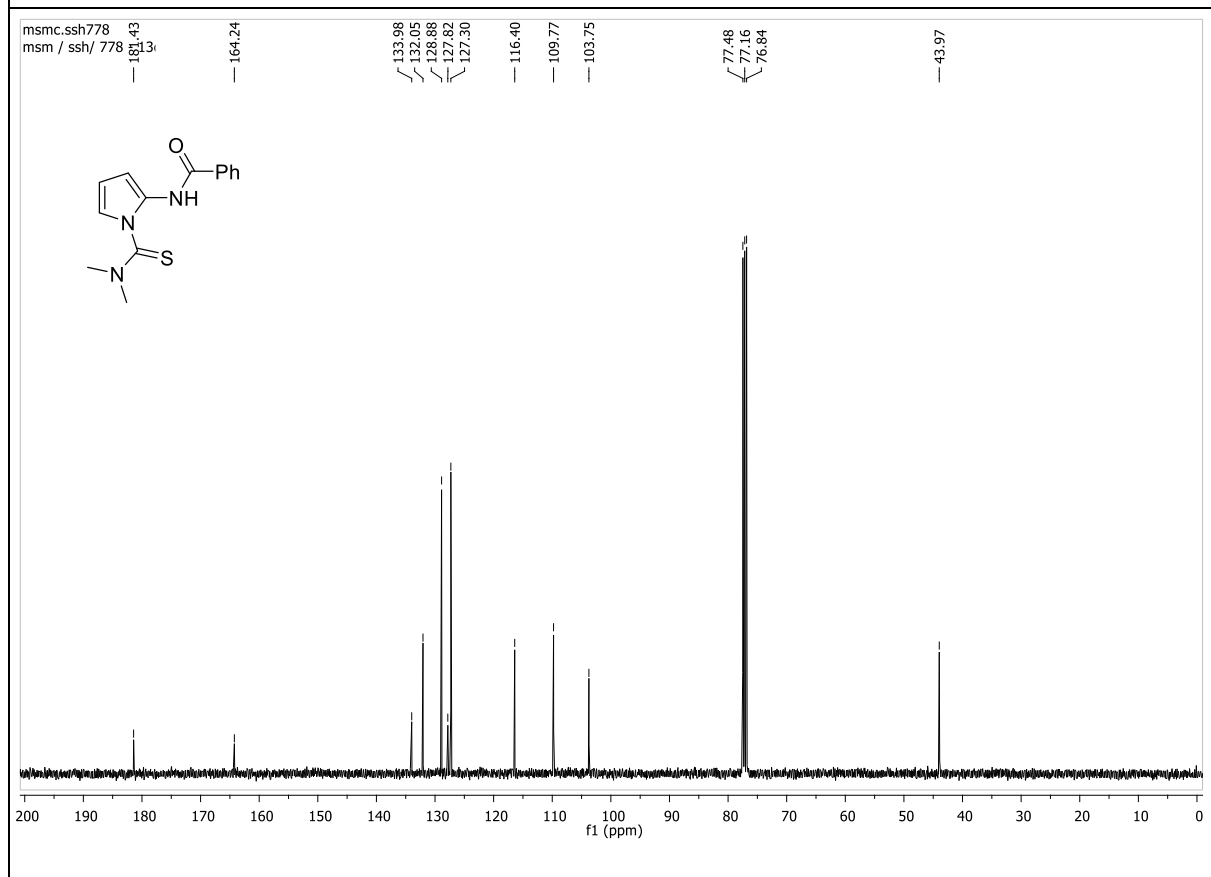



# <sup>1</sup>H NMR and <sup>13</sup>C NMR Spectra of Compound **6b**

msm.ssh929p  
msm / ssh / 929p - 1h - 500mhz

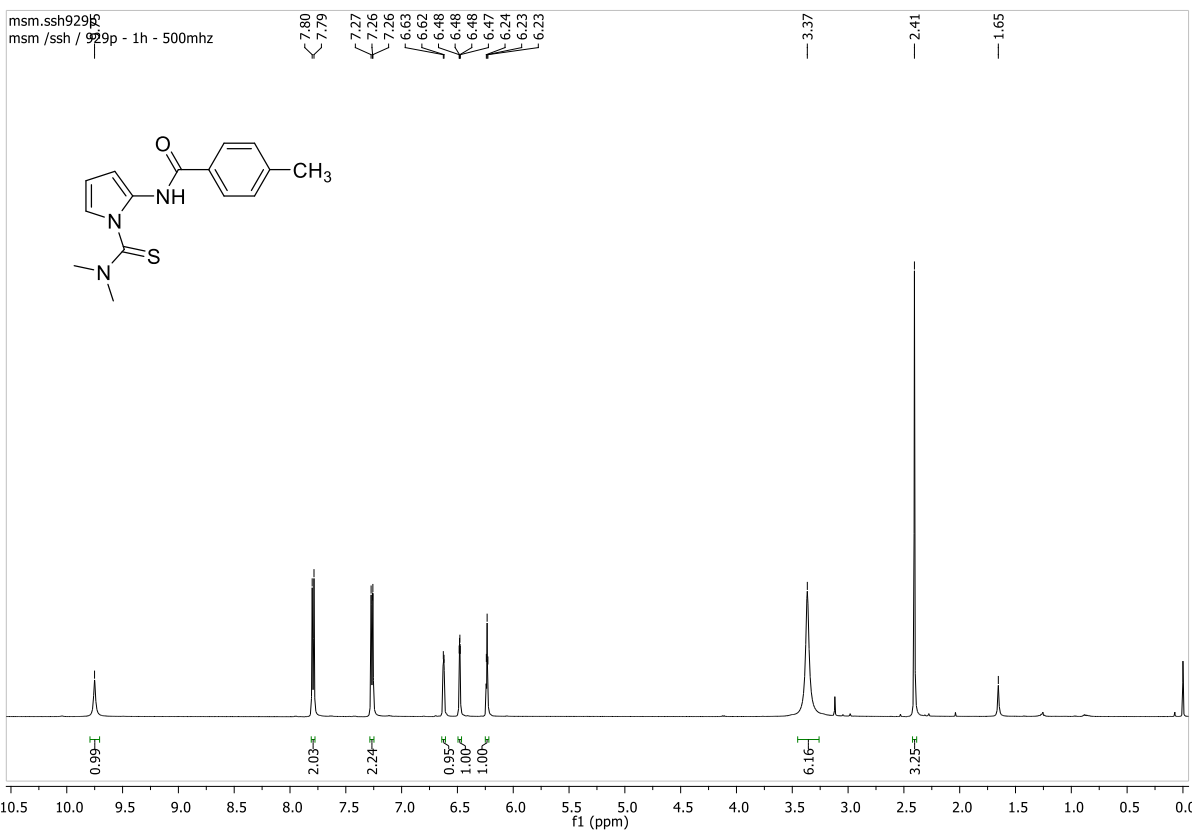

msm.ab2053p  
msm / ab / 2053p - 1h - 500mhz

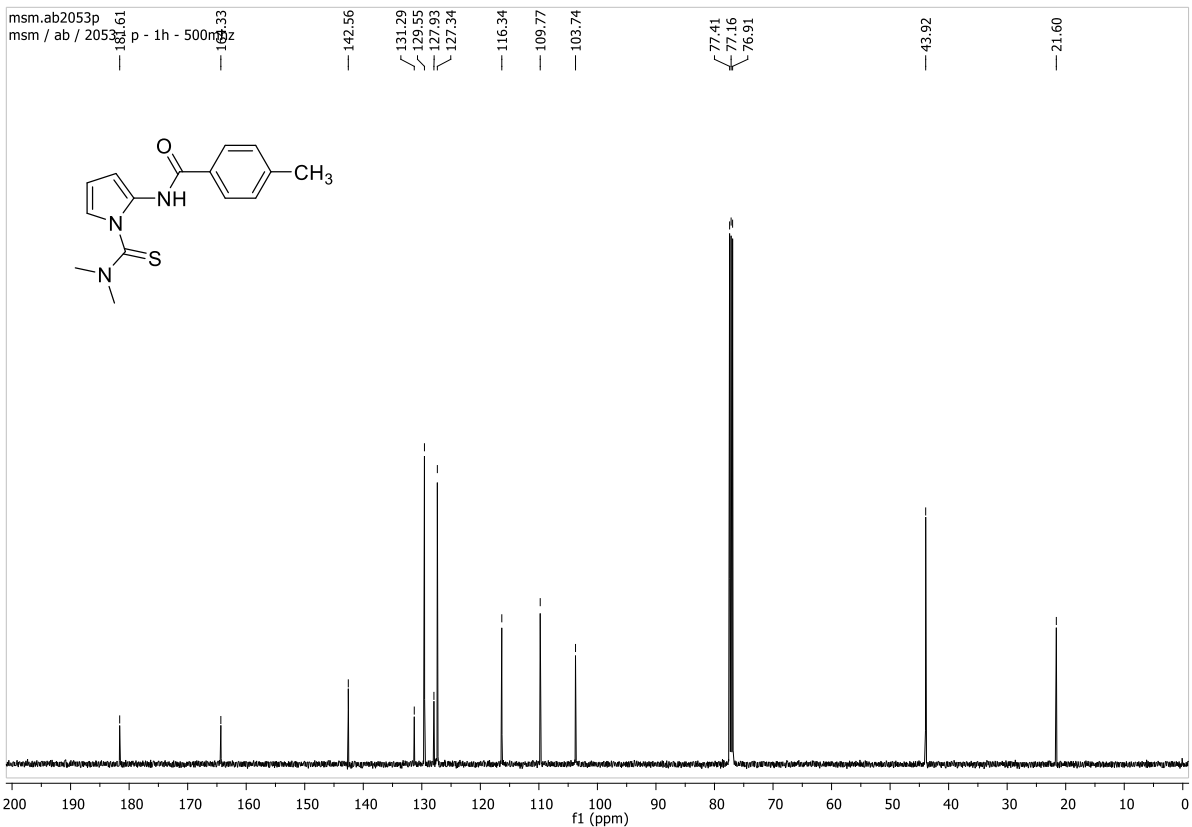

# <sup>1</sup>H NMR and <sup>13</sup>C NMR Spectra of Compound 6c

msh.ssh928p  
msh / ssh / 928p - 1h - 500mhz

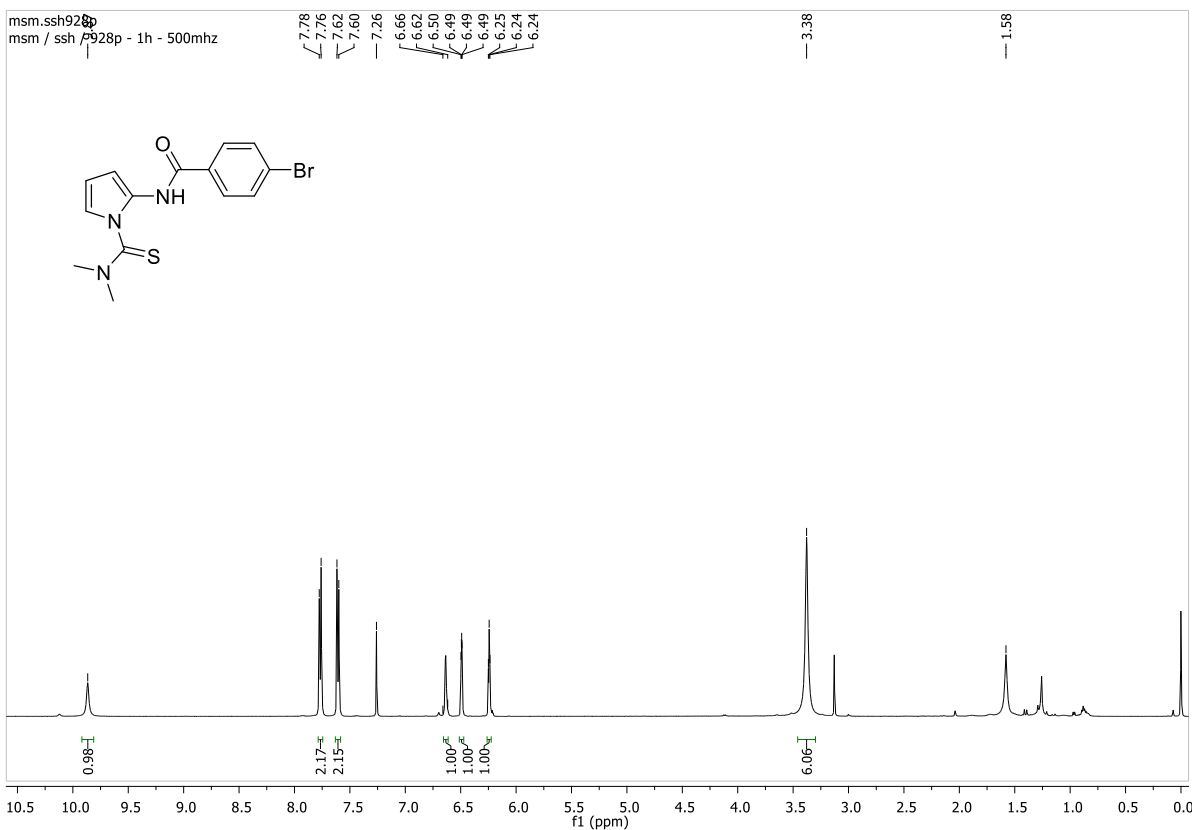

msh.ssh928  
msh / ssh / 928p - 13c - 500mhz

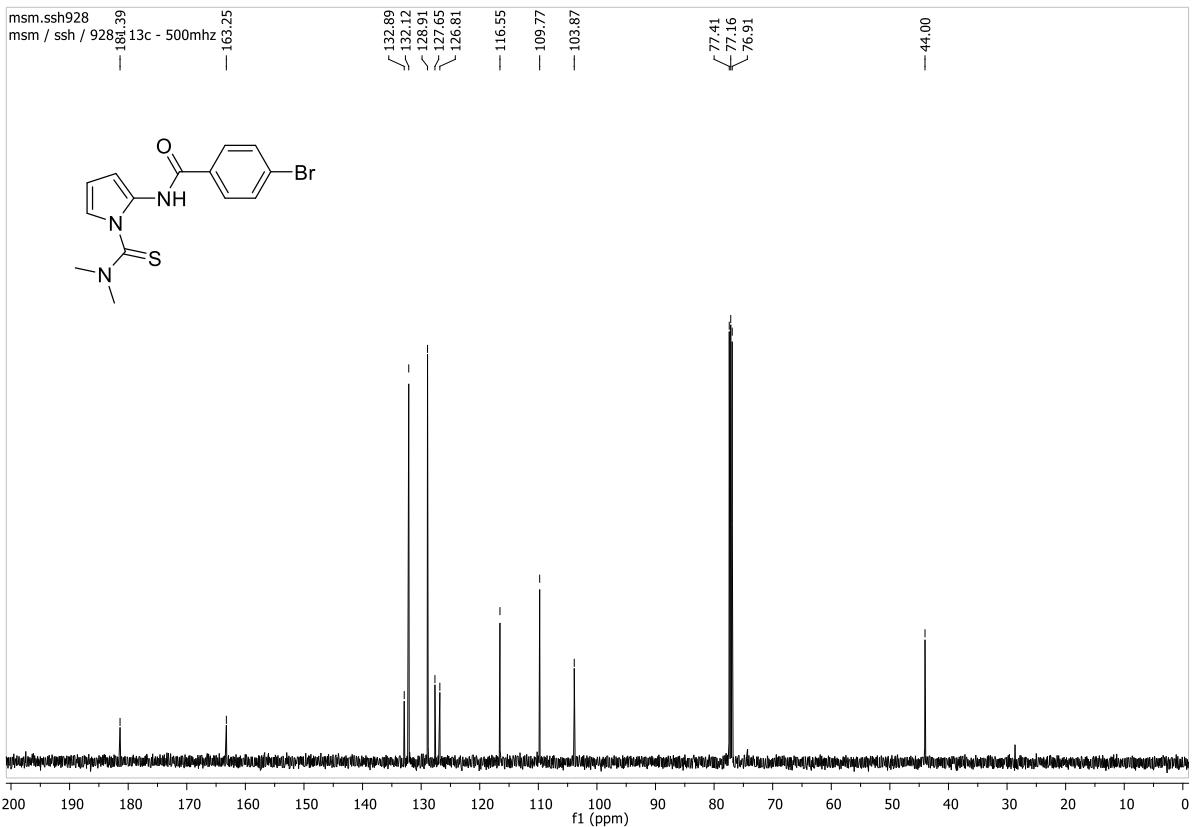

# <sup>1</sup>H NMR and <sup>13</sup>C NMR Spectra of Compound **6d**

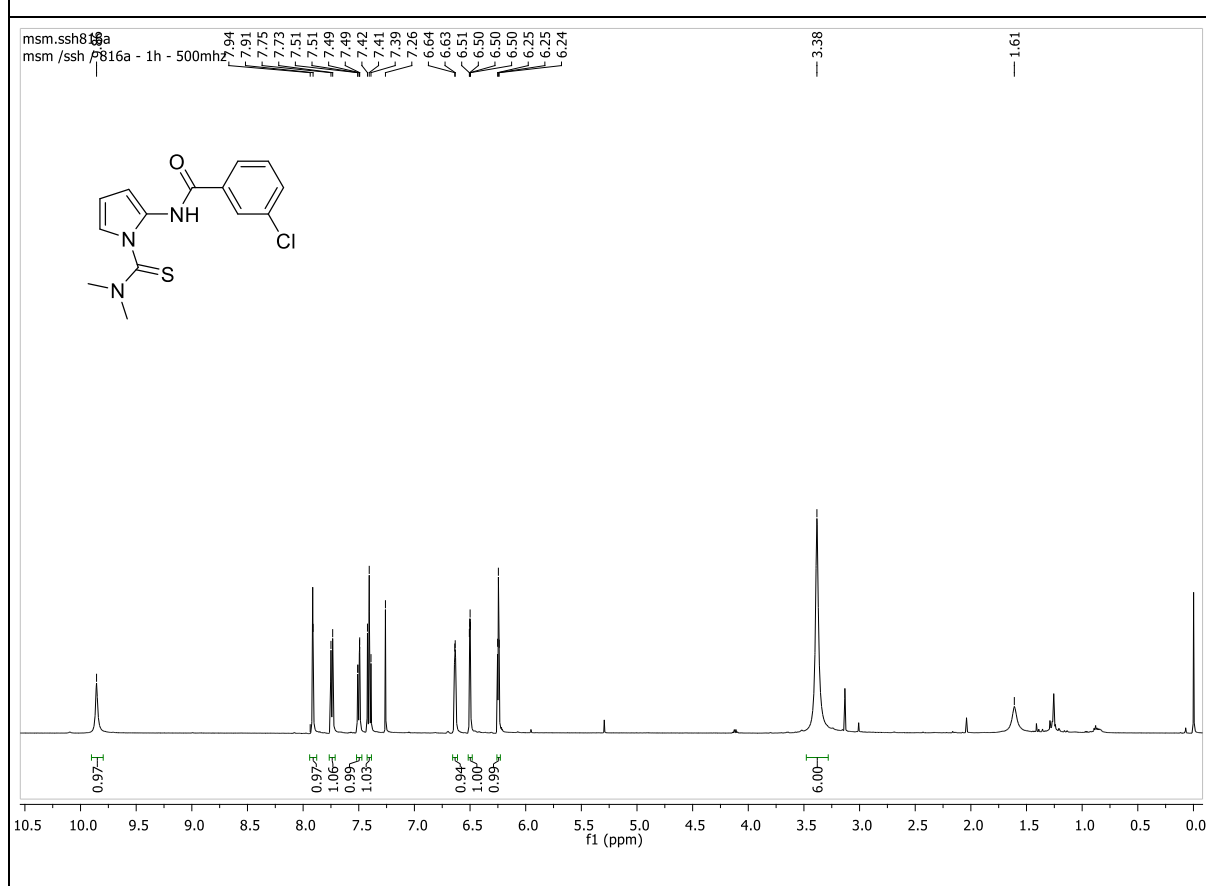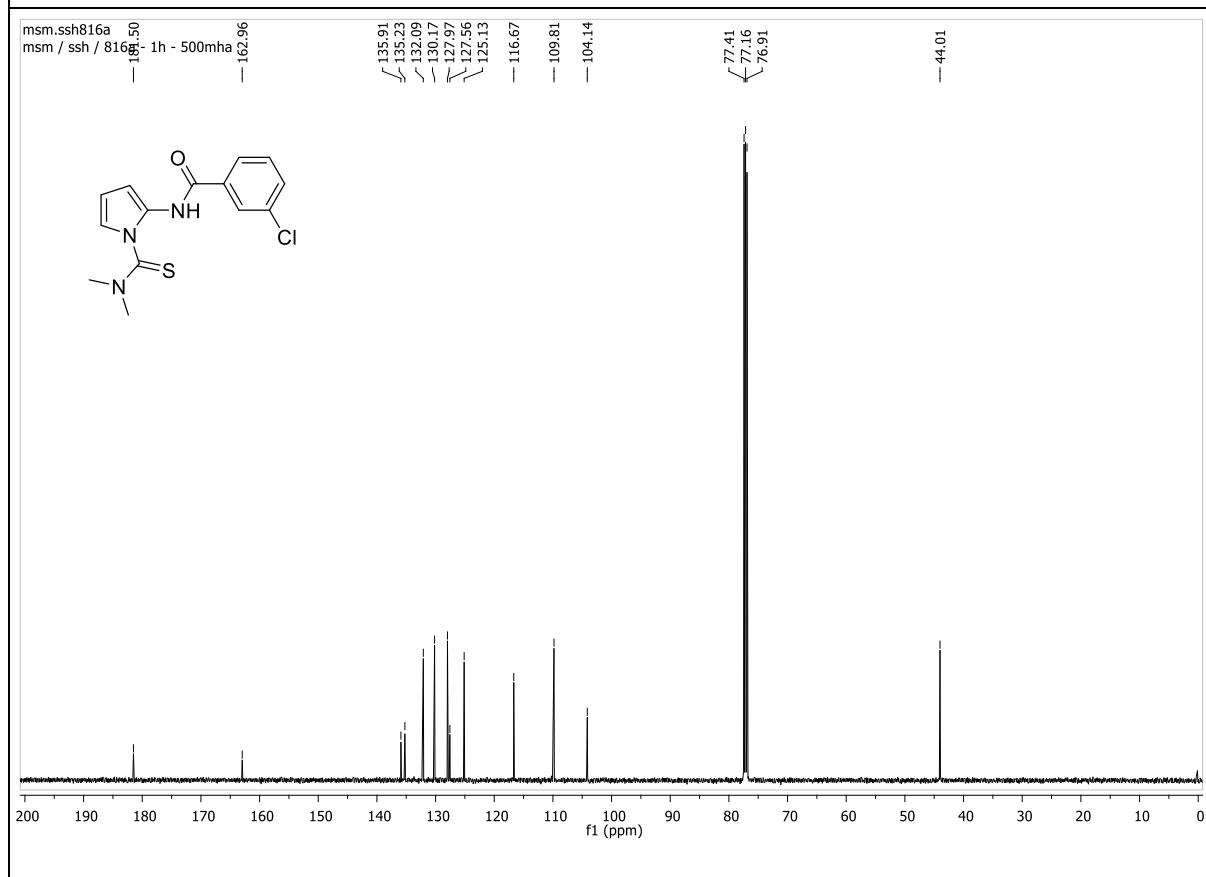

# <sup>1</sup>H NMR and <sup>13</sup>C NMR Spectra of Compound 6e

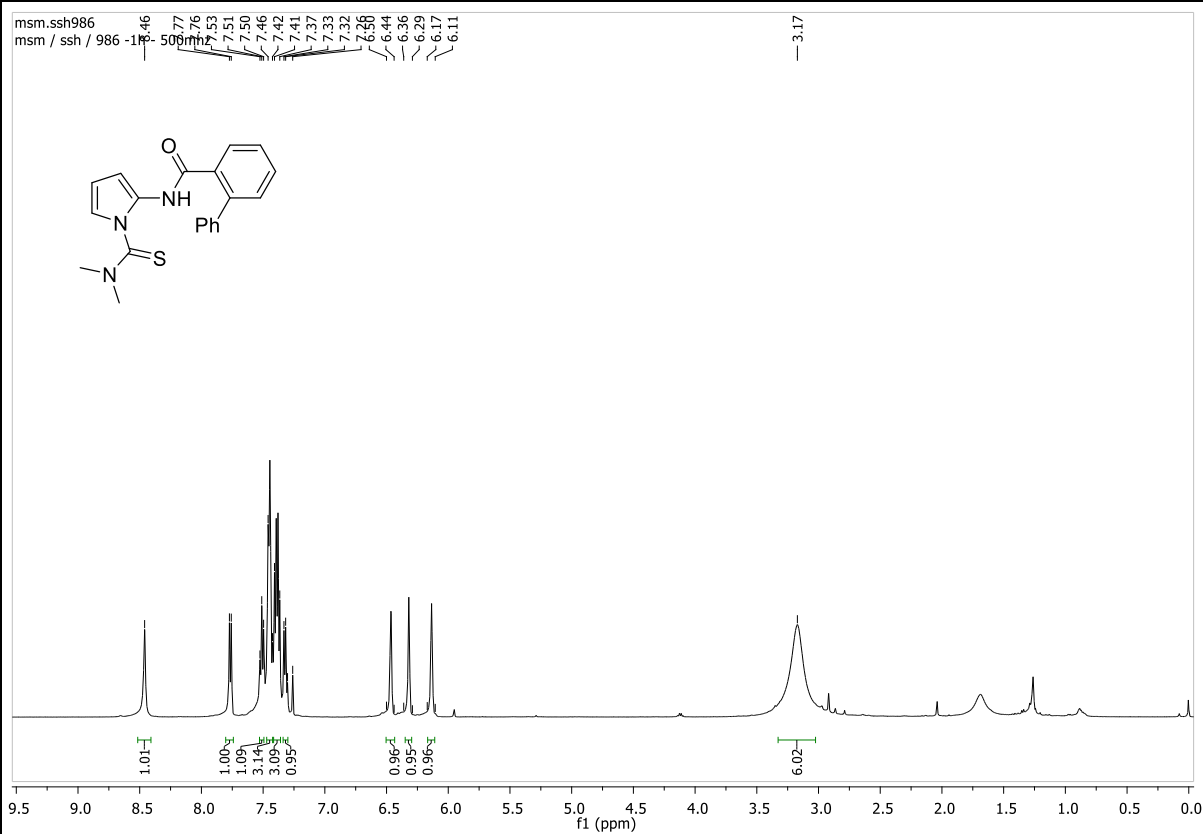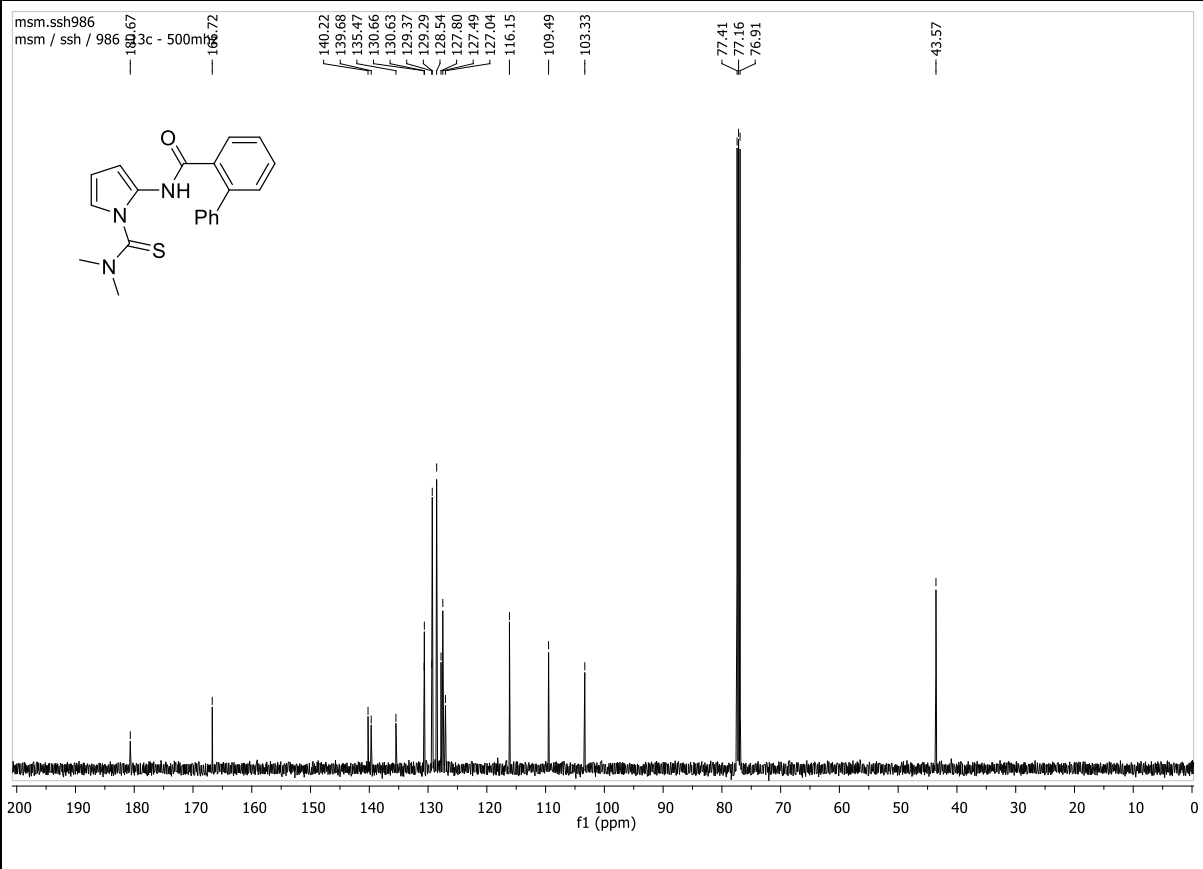

# $^1\text{H}$ NMR and $^{13}\text{C}$ NMR Spectra of Compound **6f**

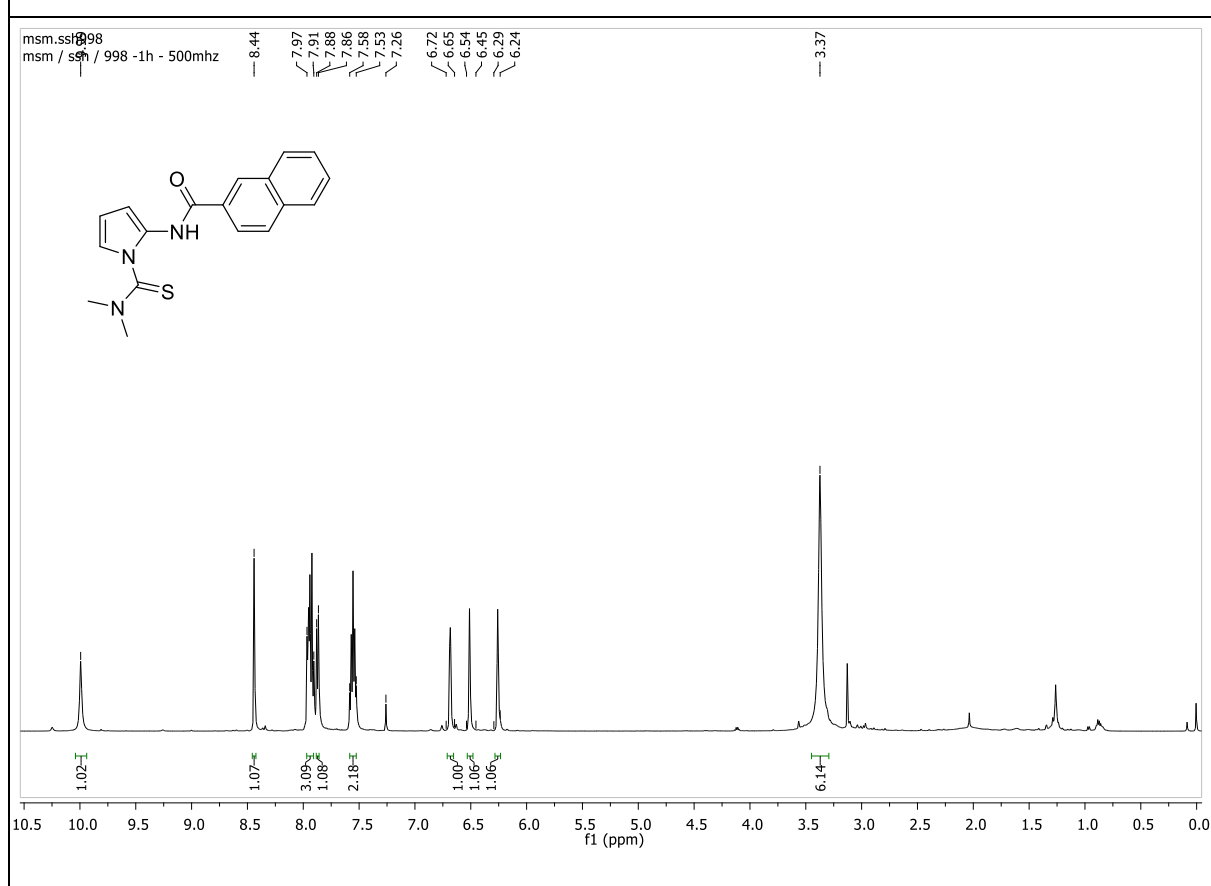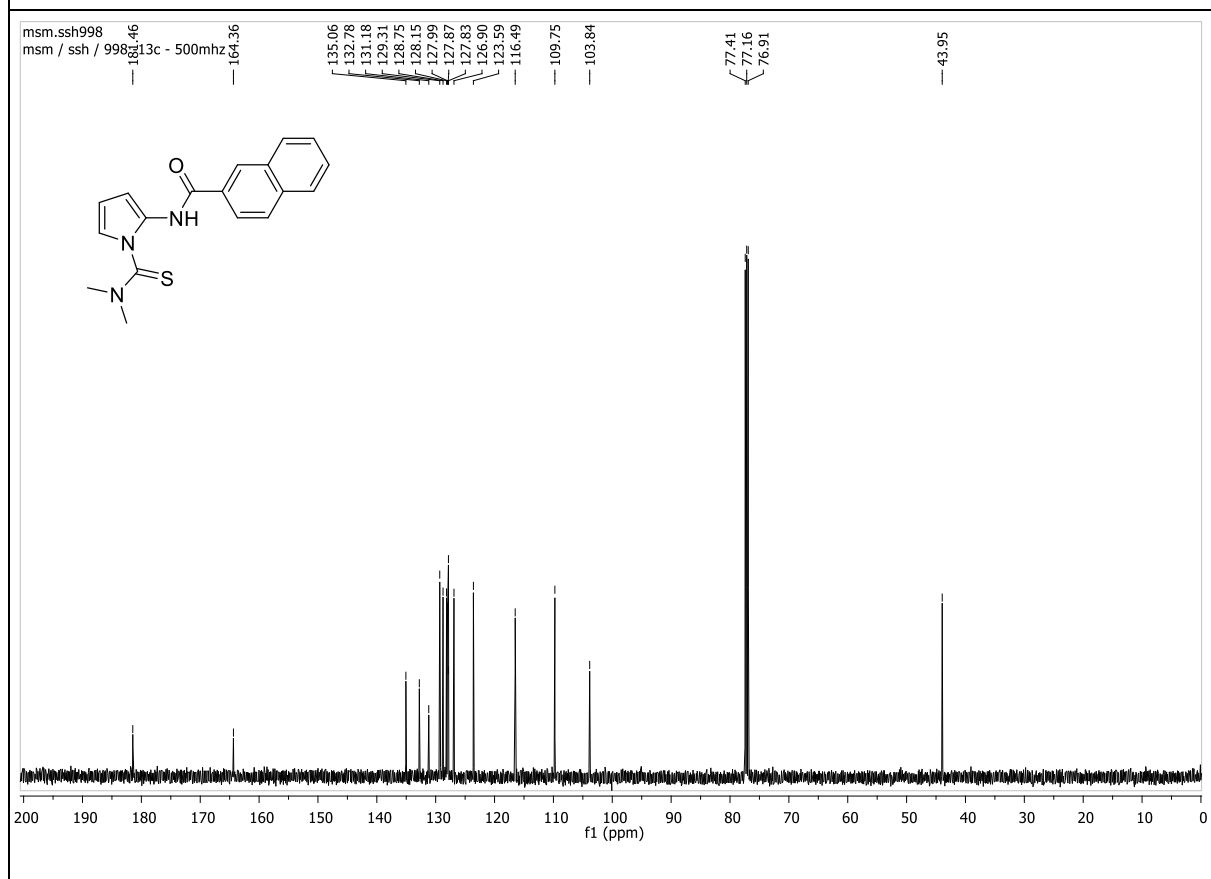

# <sup>1</sup>H NMR and <sup>13</sup>C NMR Spectra of Compound **6g**

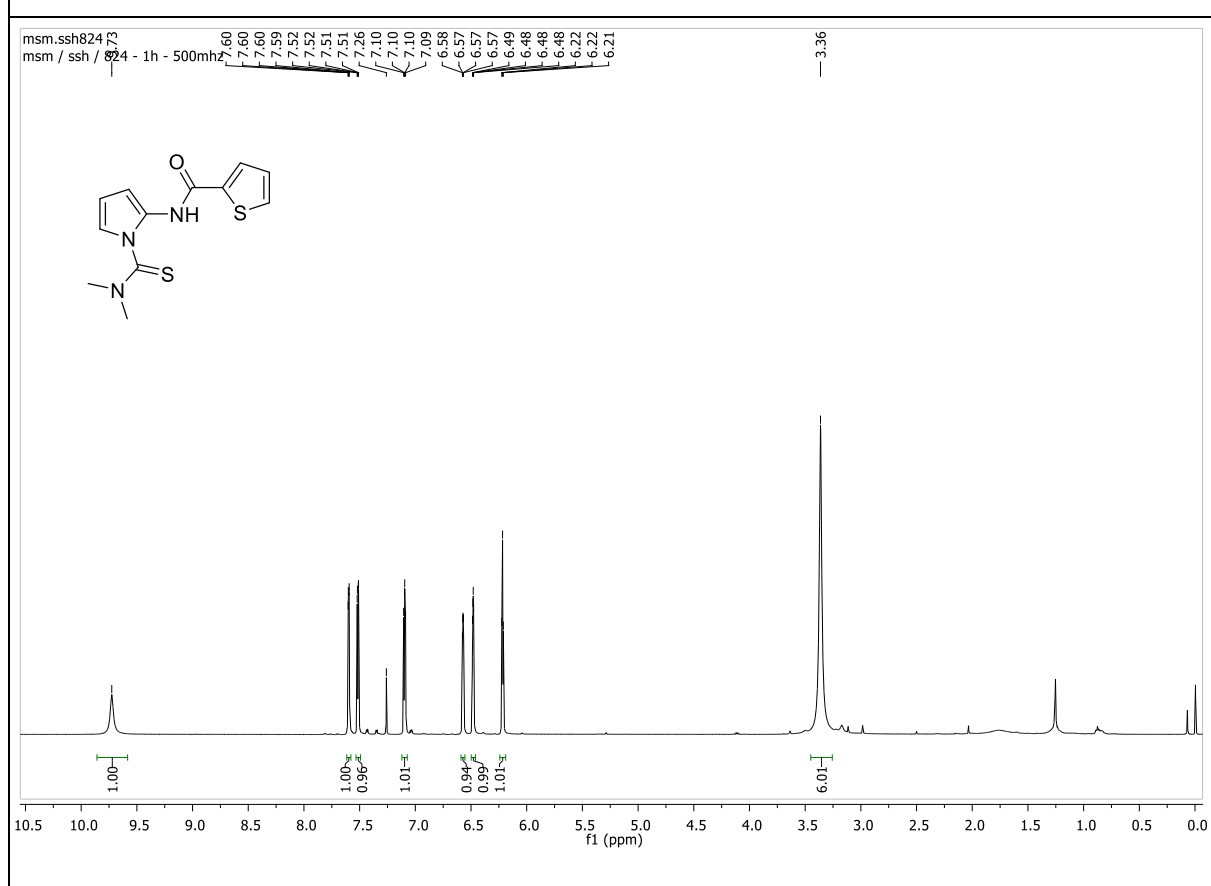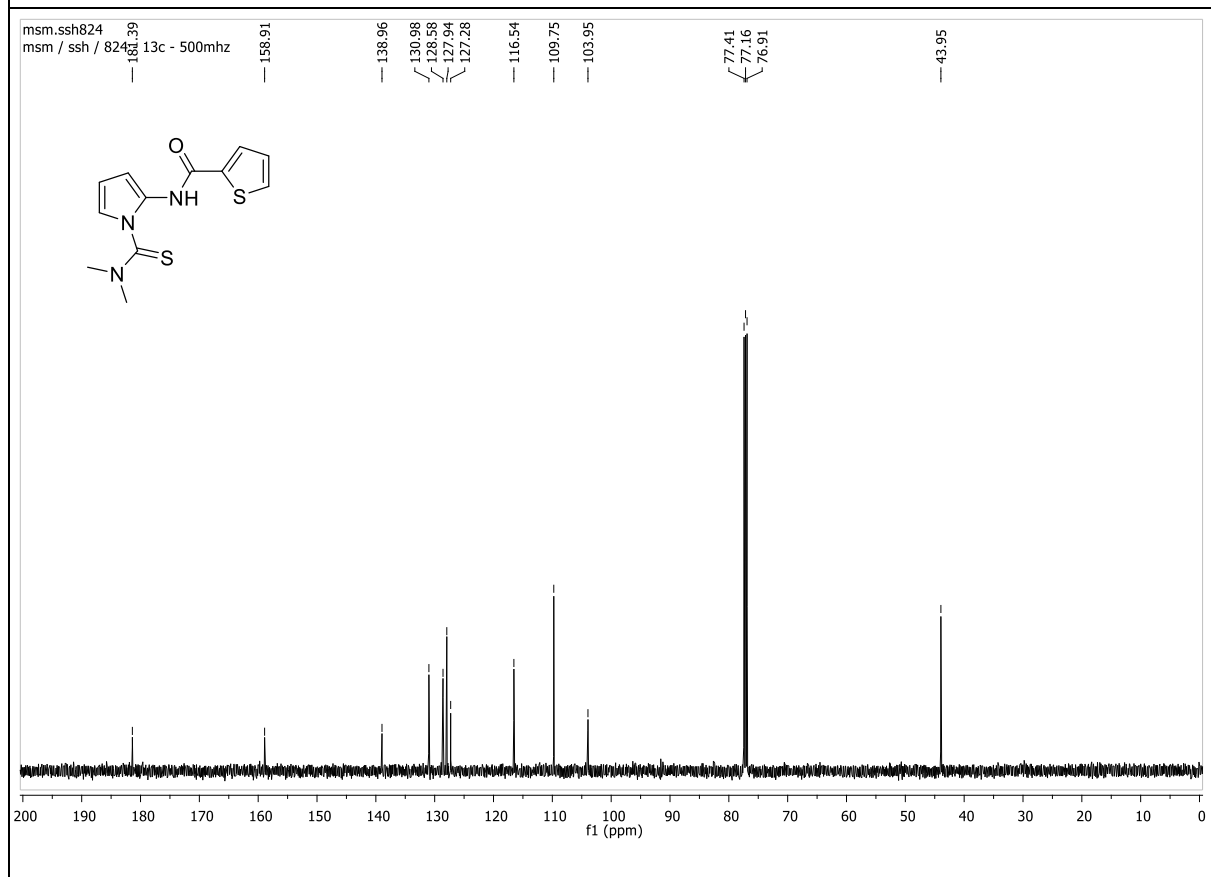

# <sup>1</sup>H NMR and <sup>13</sup>C NMR Spectra of Compound 6h

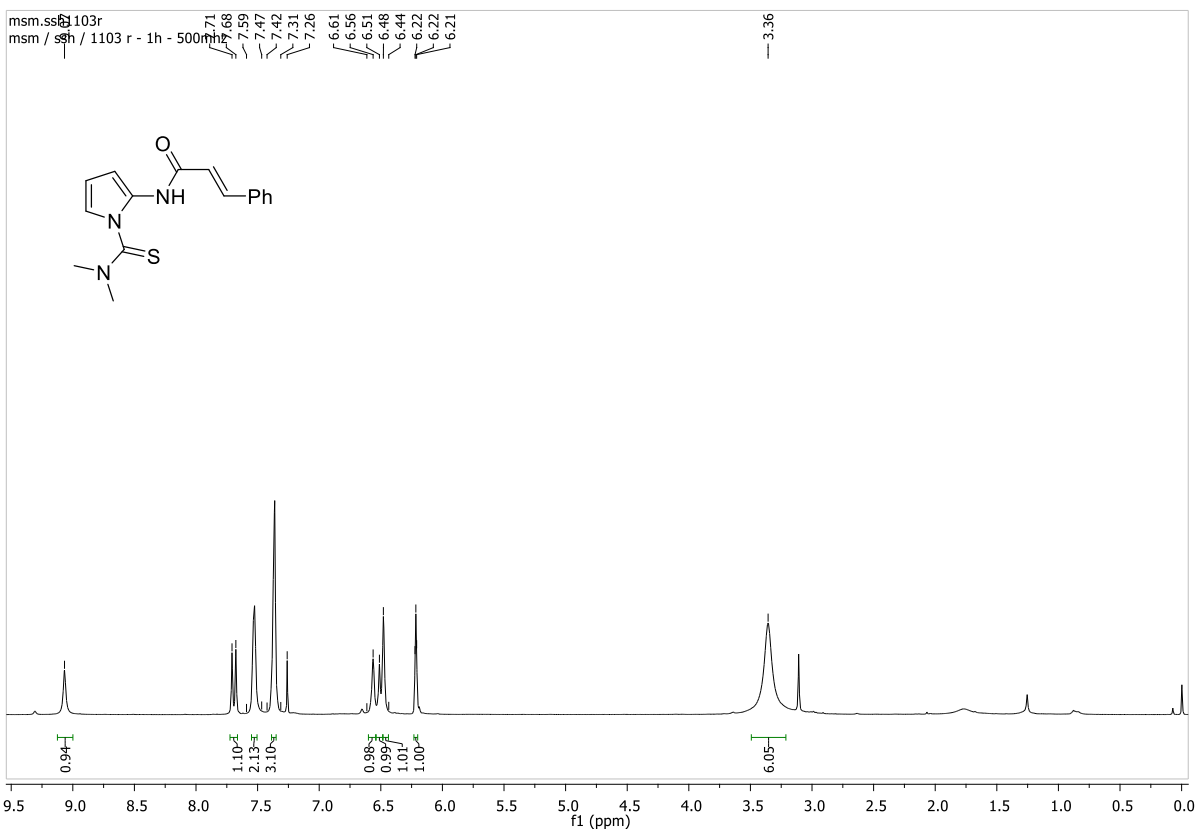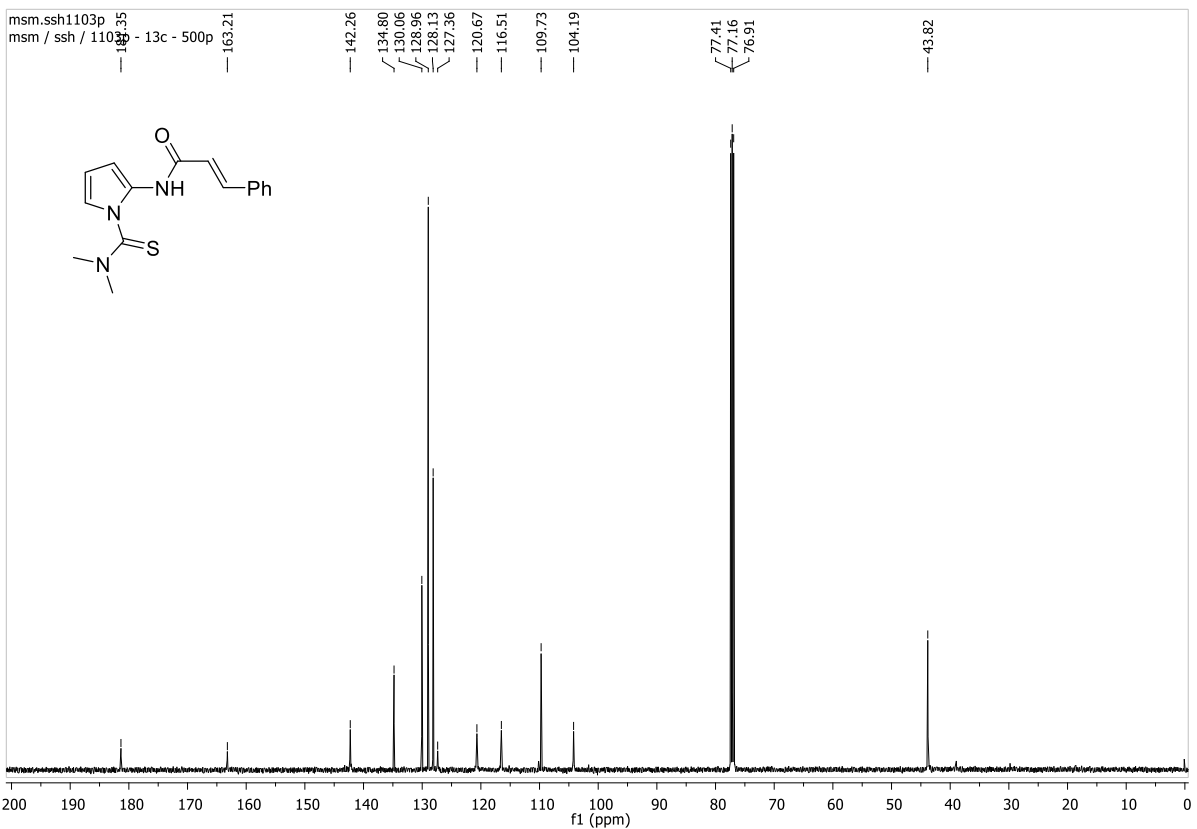

# $^1\text{H}$ NMR and $^{13}\text{C}$ NMR Spectra of Compound **6i**

mzm.ssh978  
mzm / ssh / 978 - 500mhz

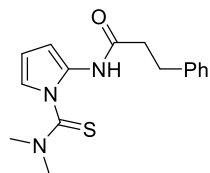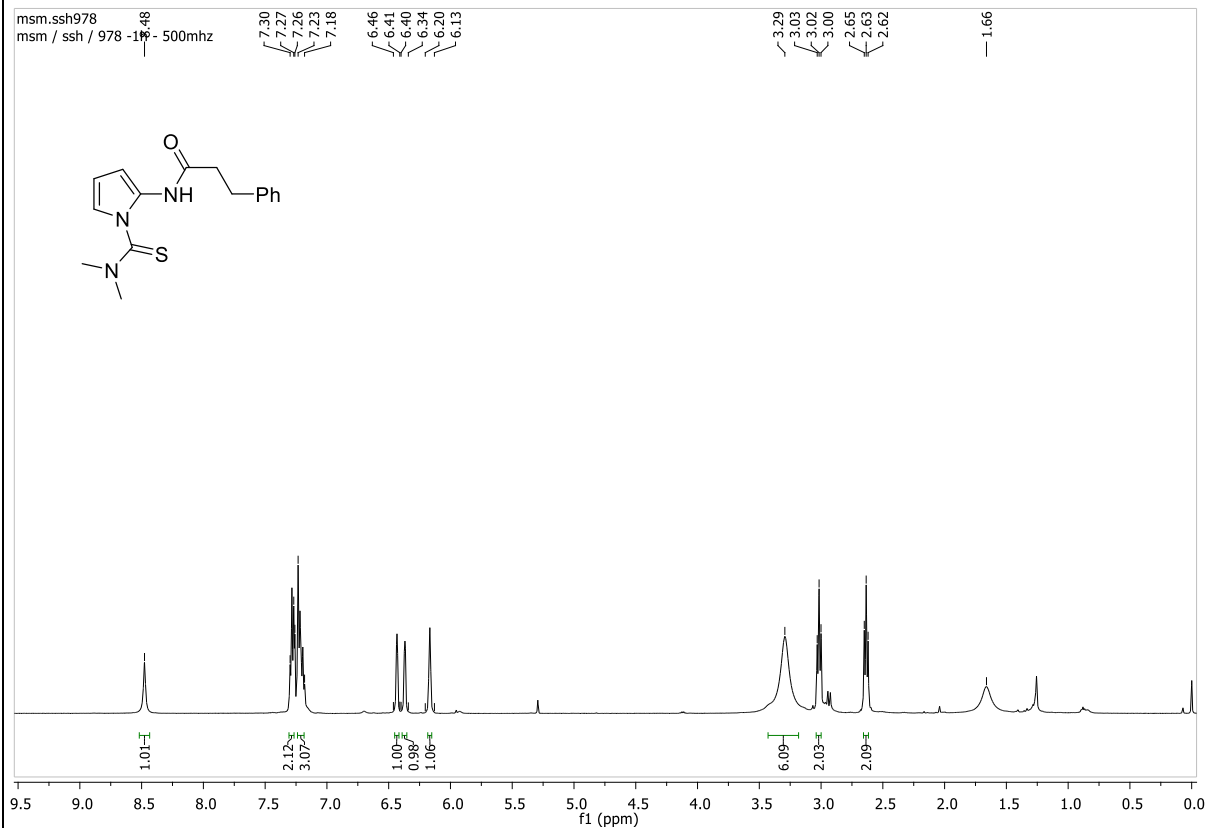

mzm.ssh975  
mzm / ssh / 975 - 130mhz

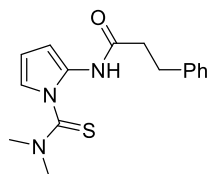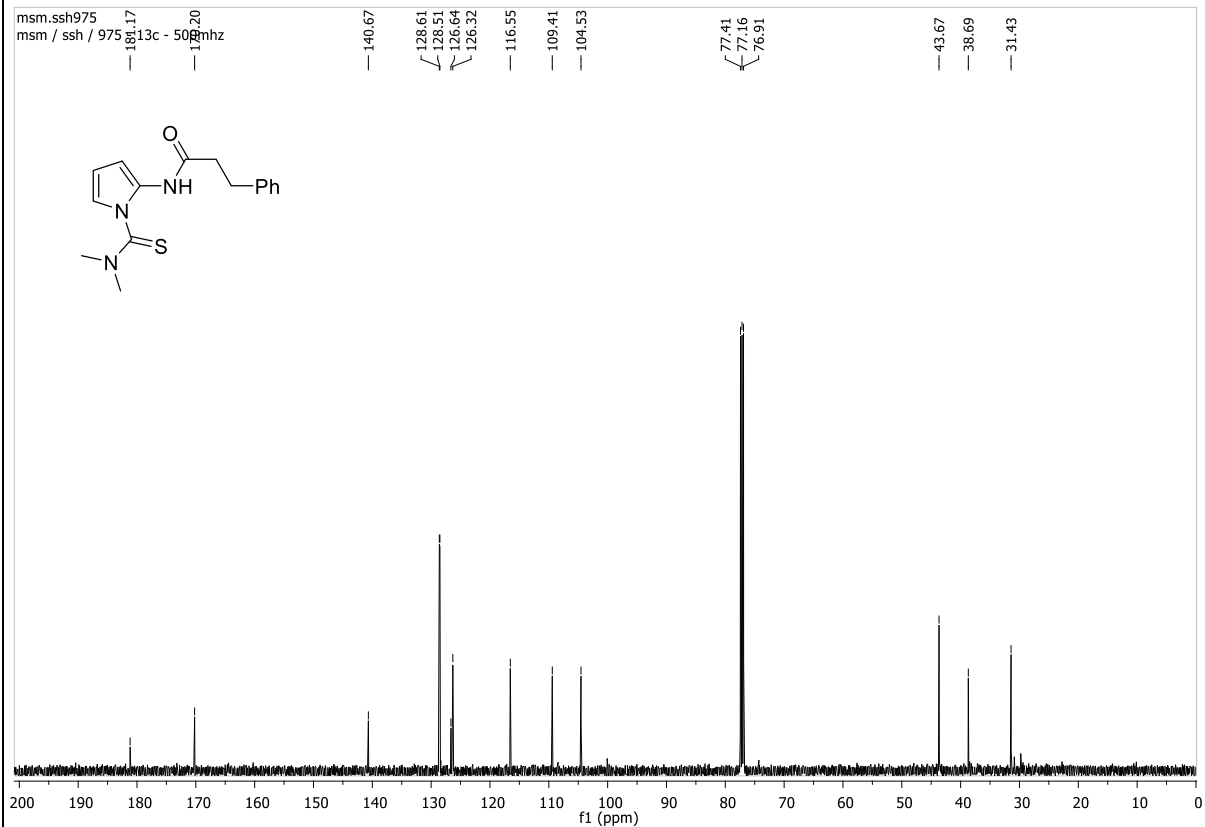



# <sup>1</sup>H NMR and <sup>13</sup>C NMR Spectra of Compound 6j

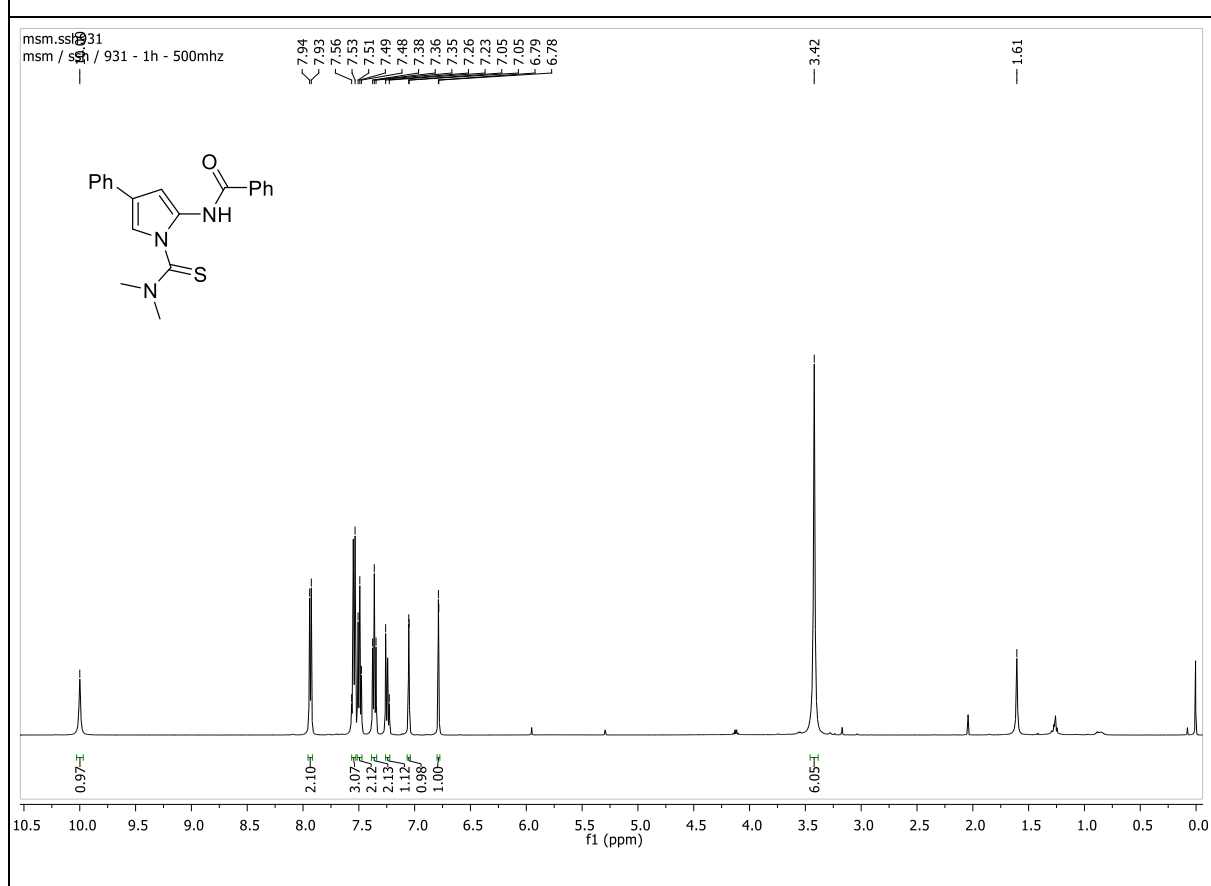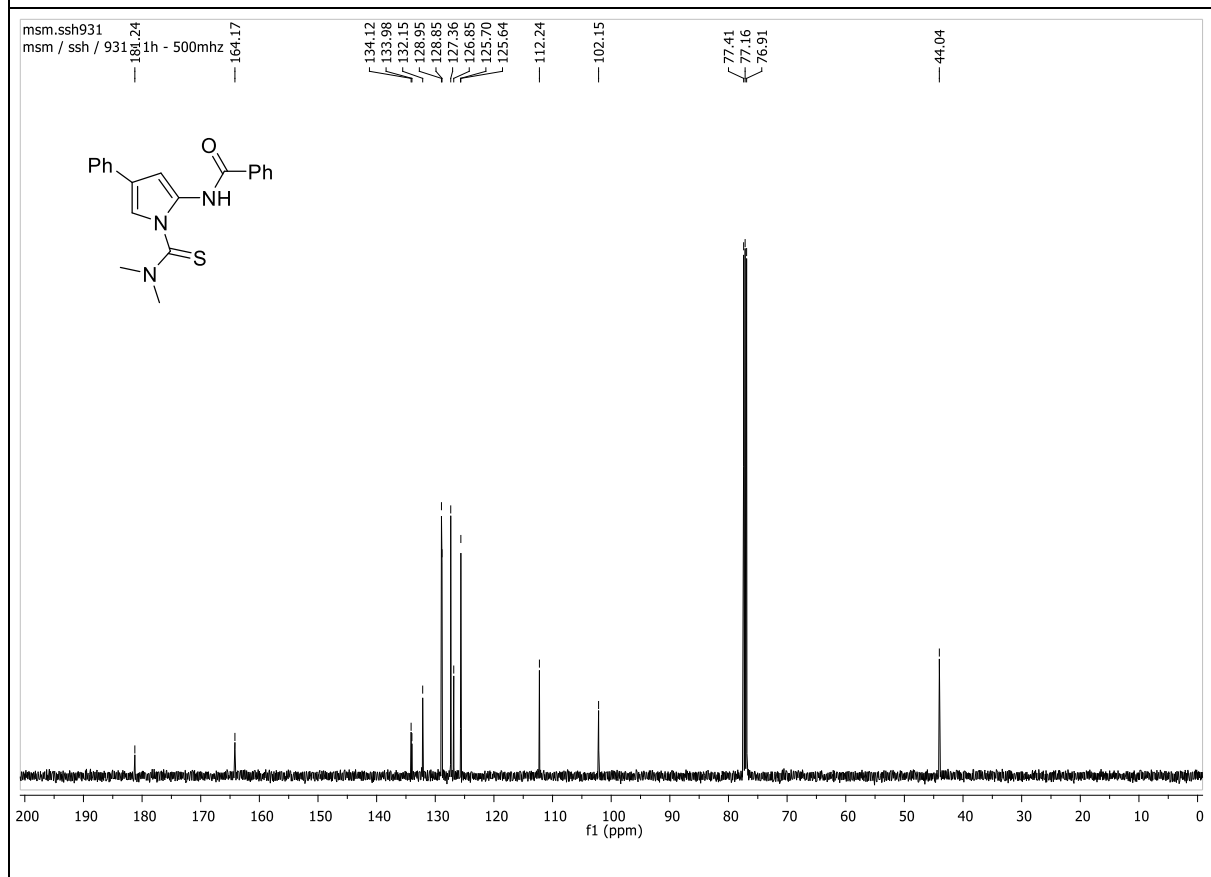

# <sup>1</sup>H NMR and <sup>13</sup>C NMR Spectra of Compound **6k**

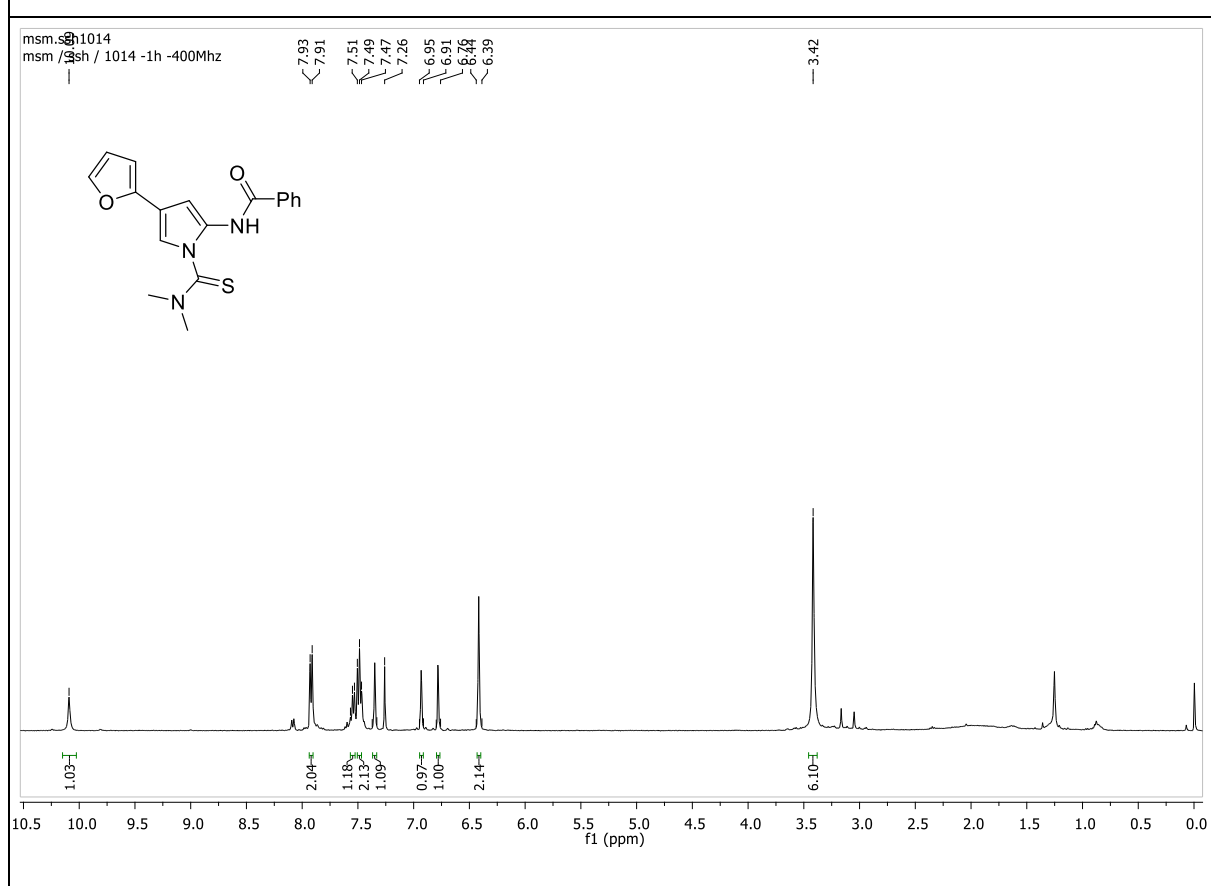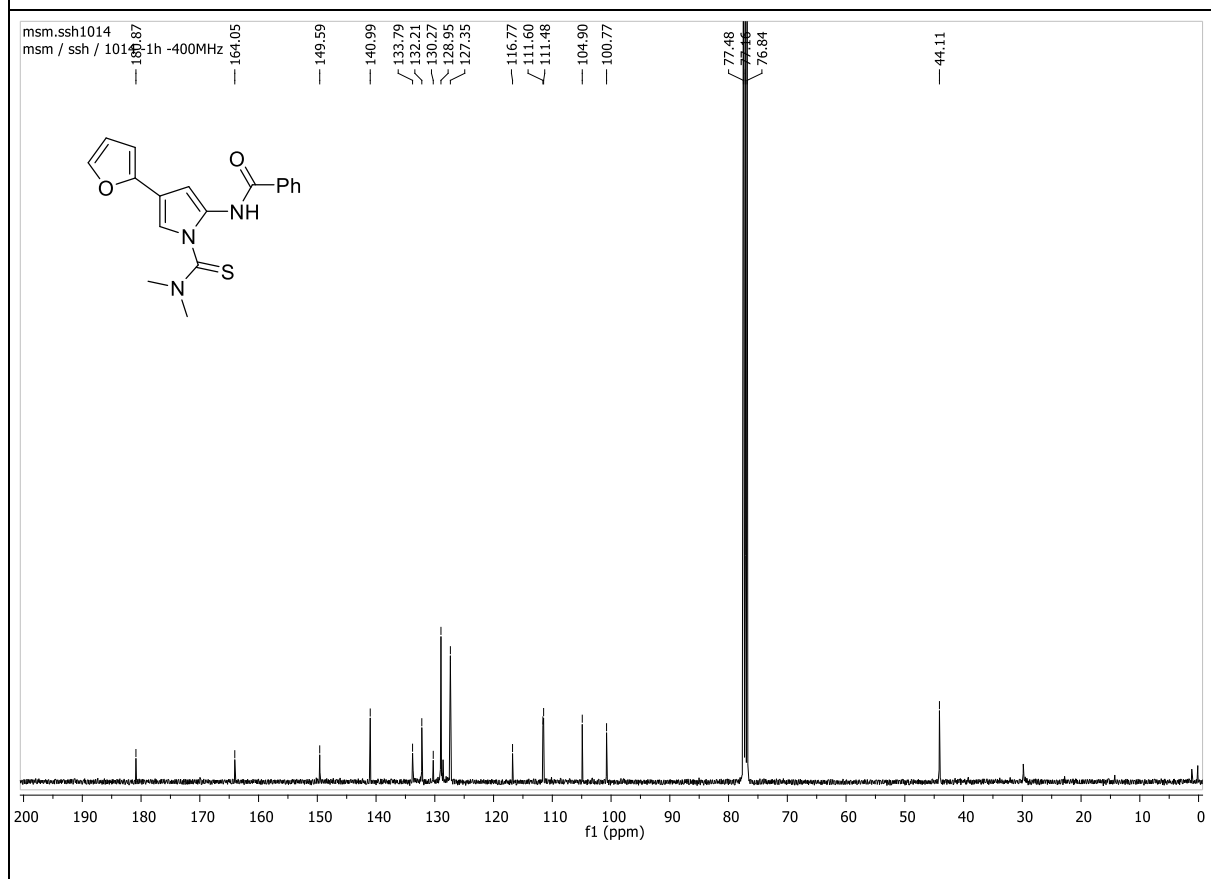

# <sup>1</sup>H NMR and <sup>13</sup>C NMR Spectra of Compound **6l**

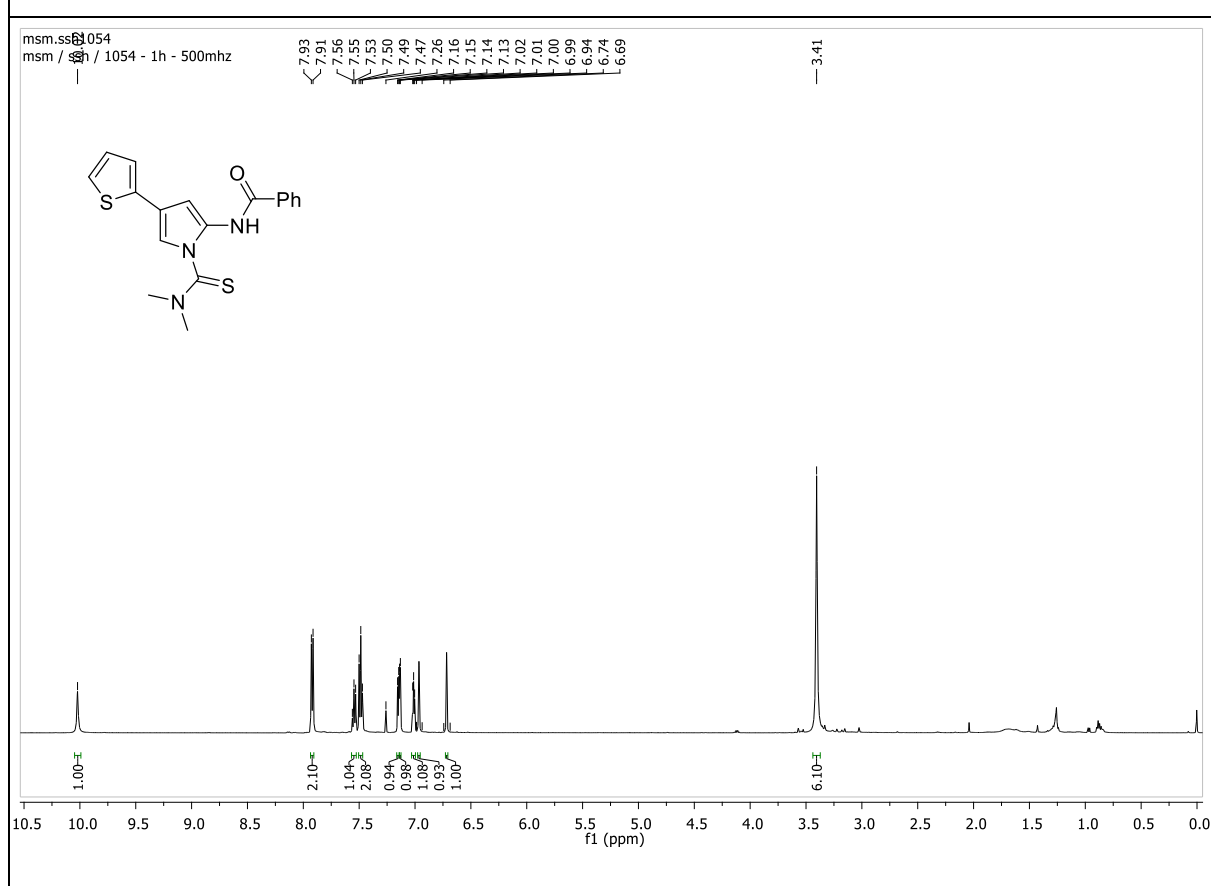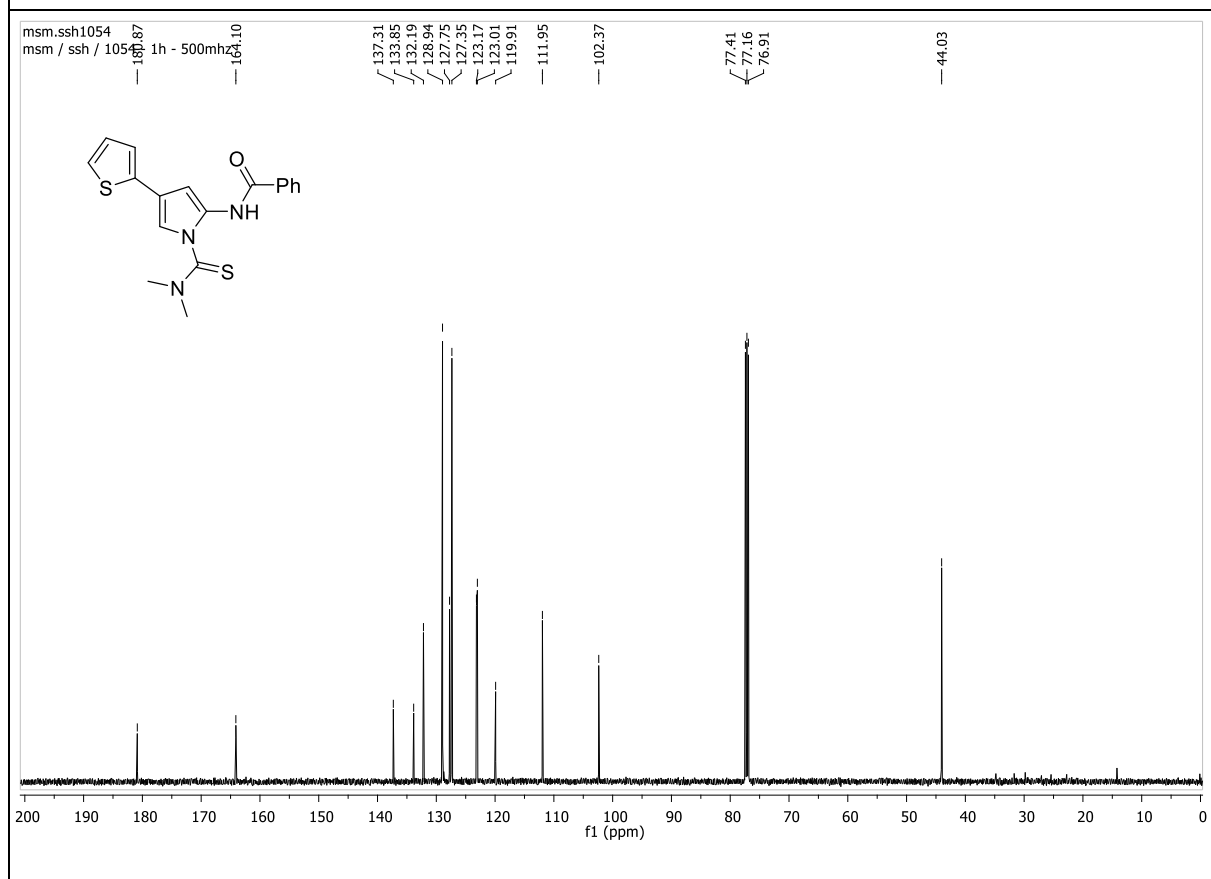

# <sup>1</sup>H NMR and <sup>13</sup>C NMR Spectra of Compound 6m

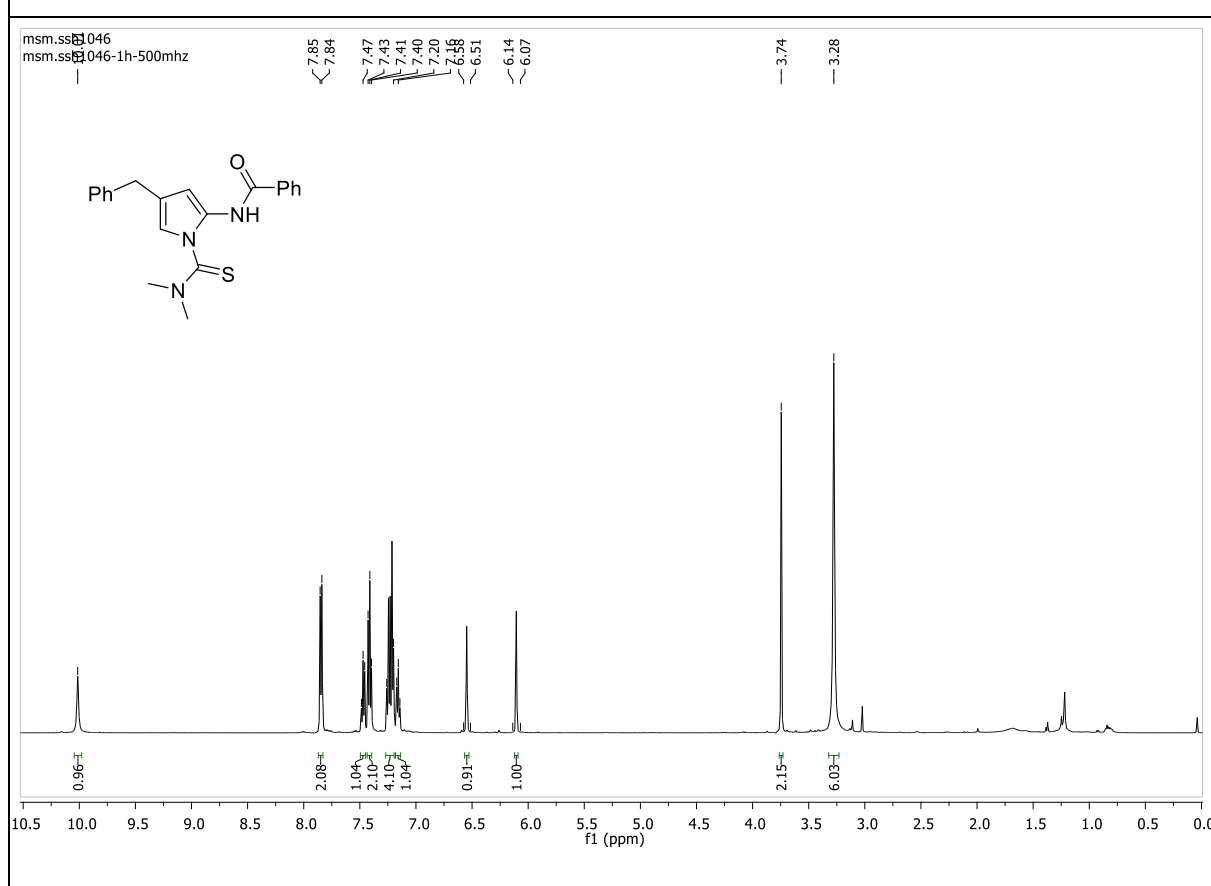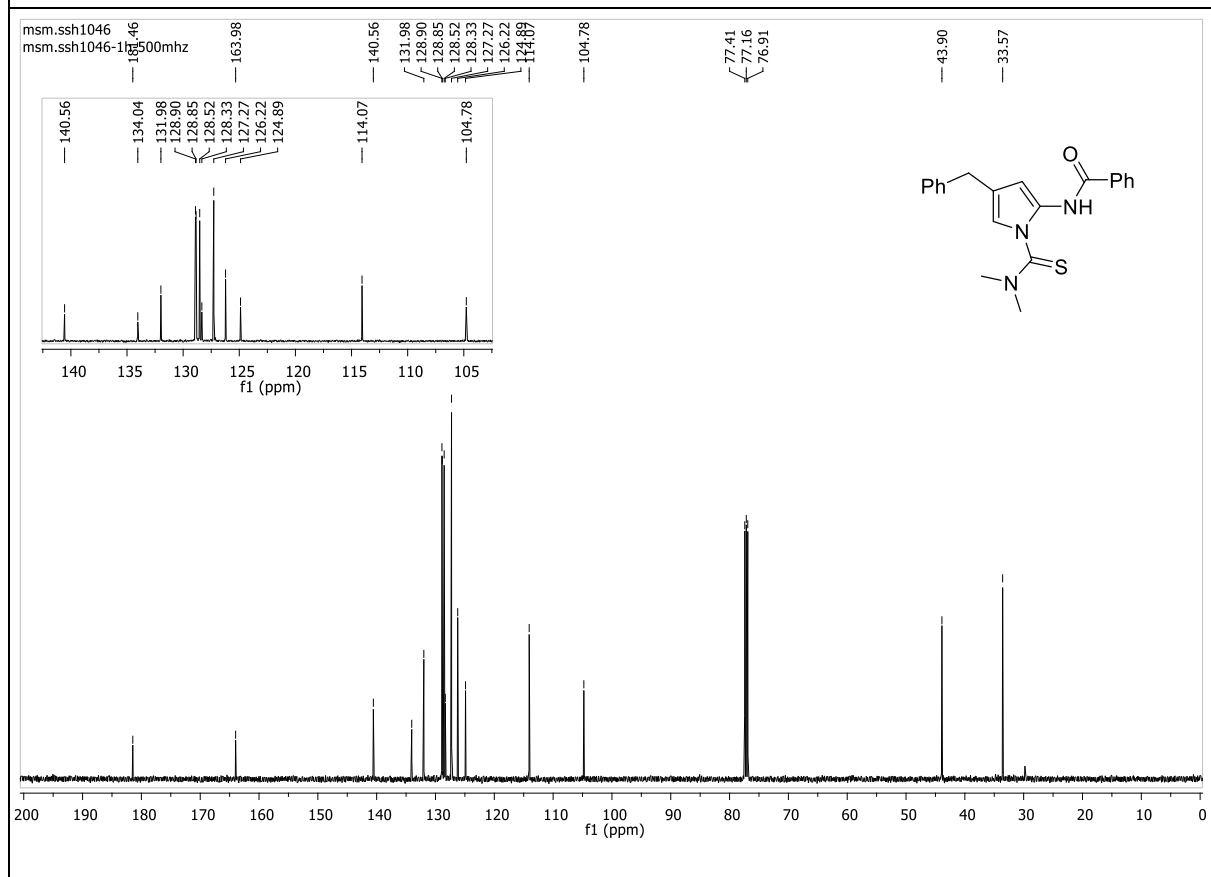

# $^1\text{H}$ NMR and $^{13}\text{C}$ NMR Spectra of Compound **6n**

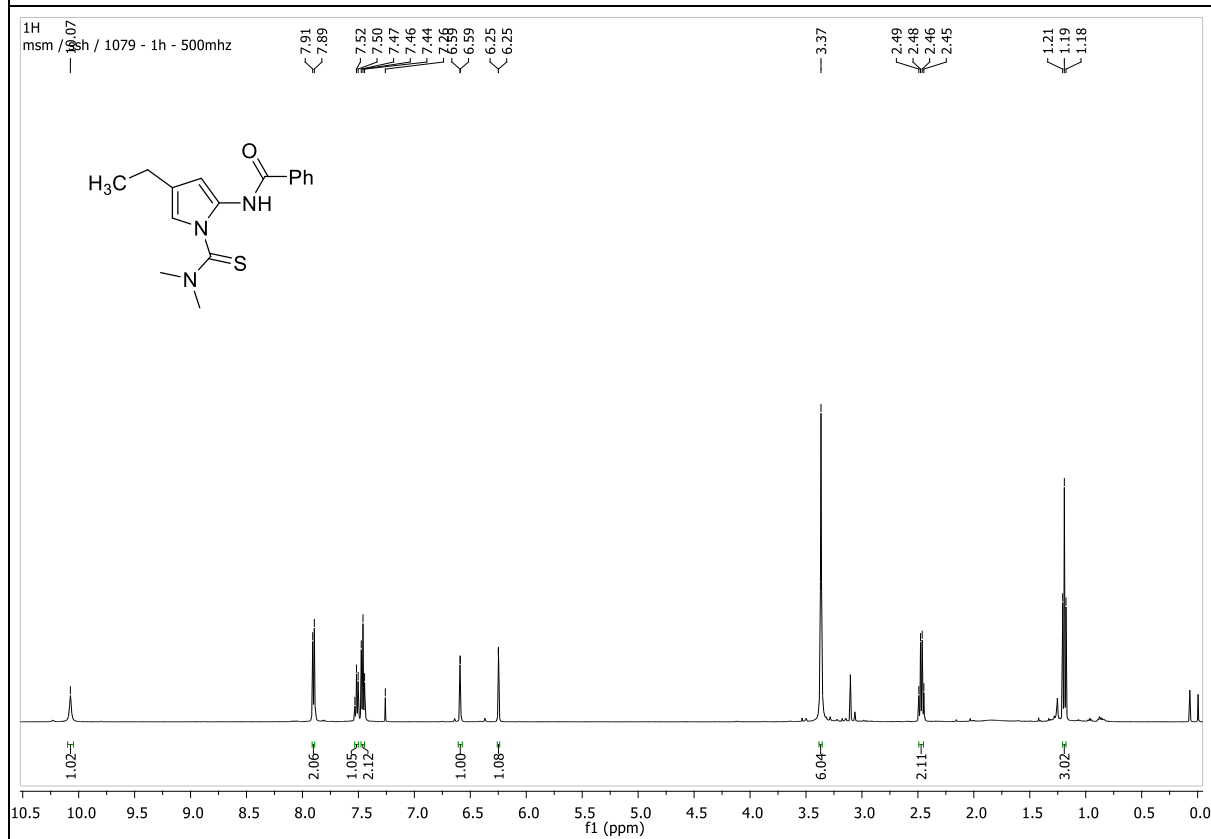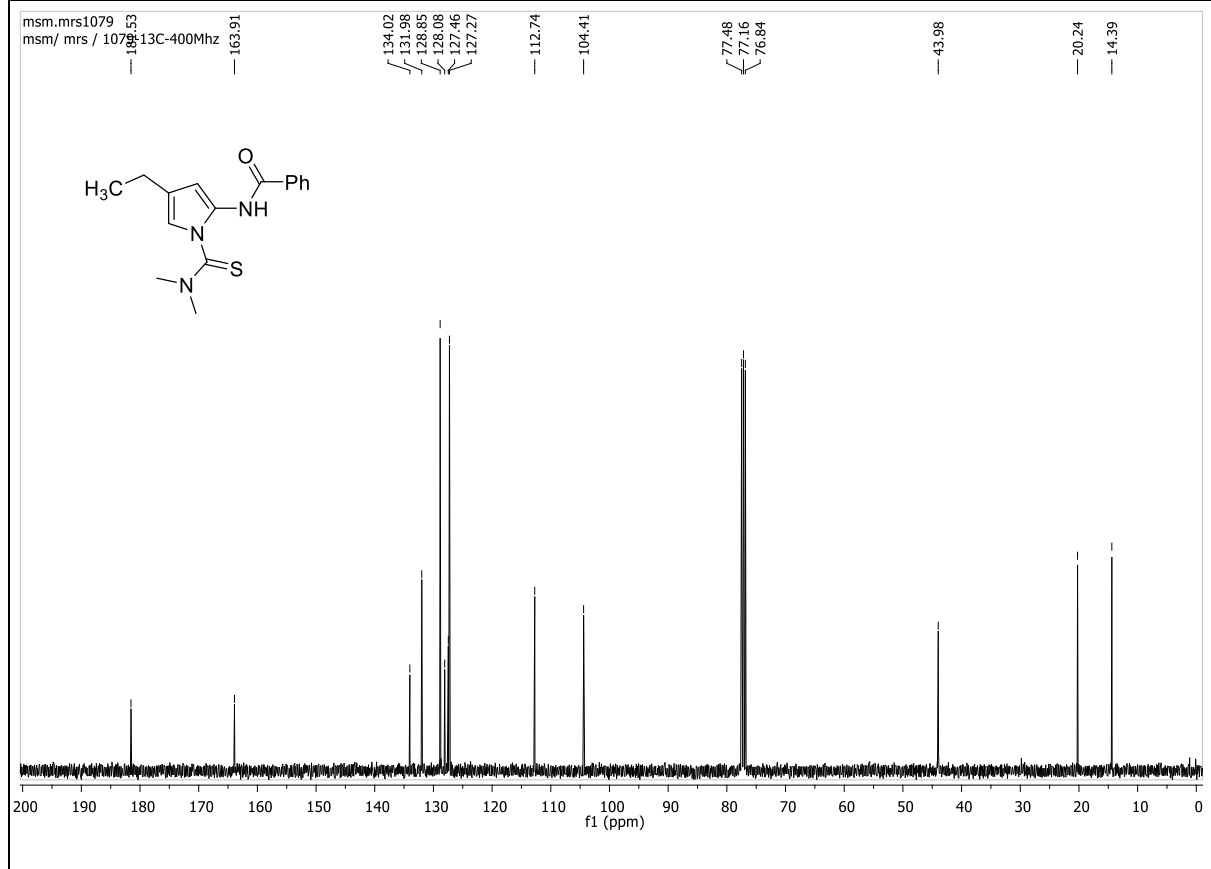

# $^1\text{H}$ NMR and $^{13}\text{C}$ NMR Spectra of Compound **60**

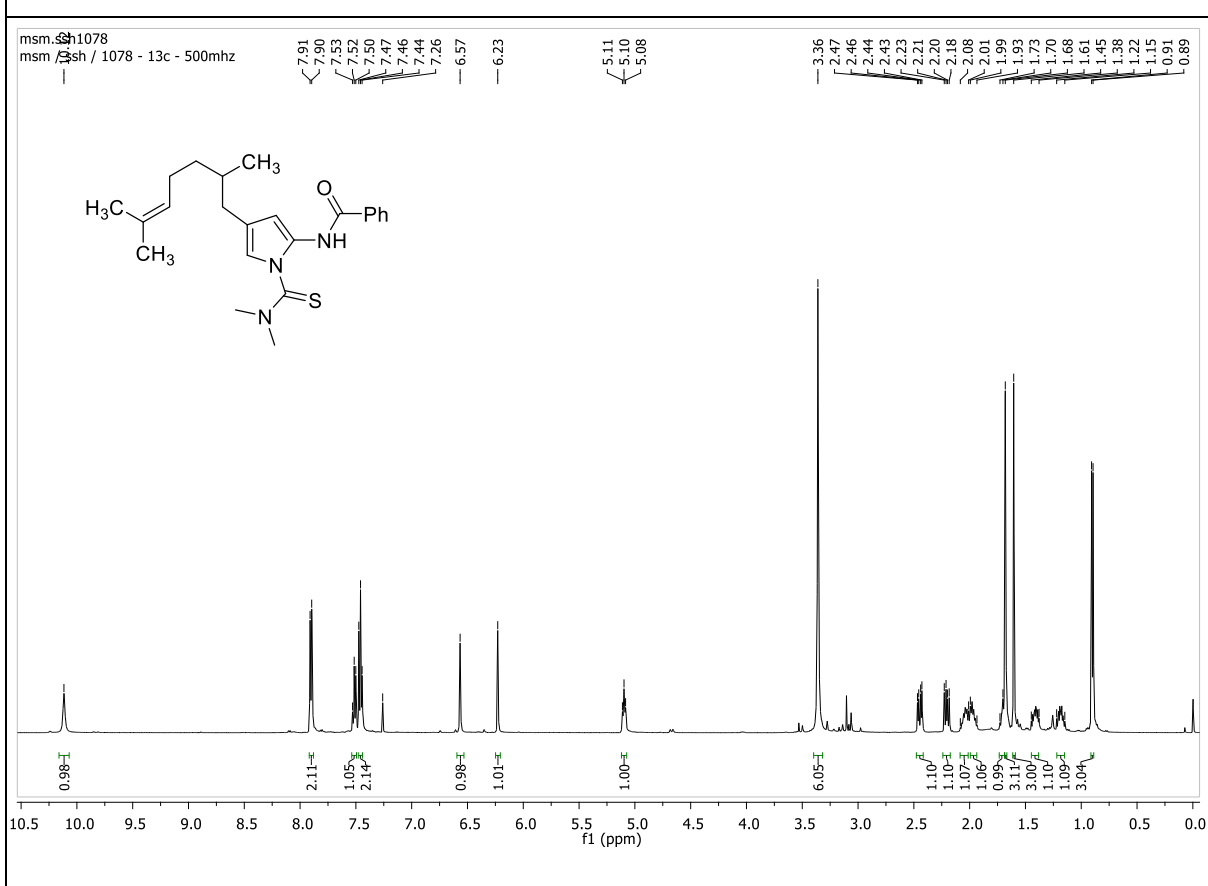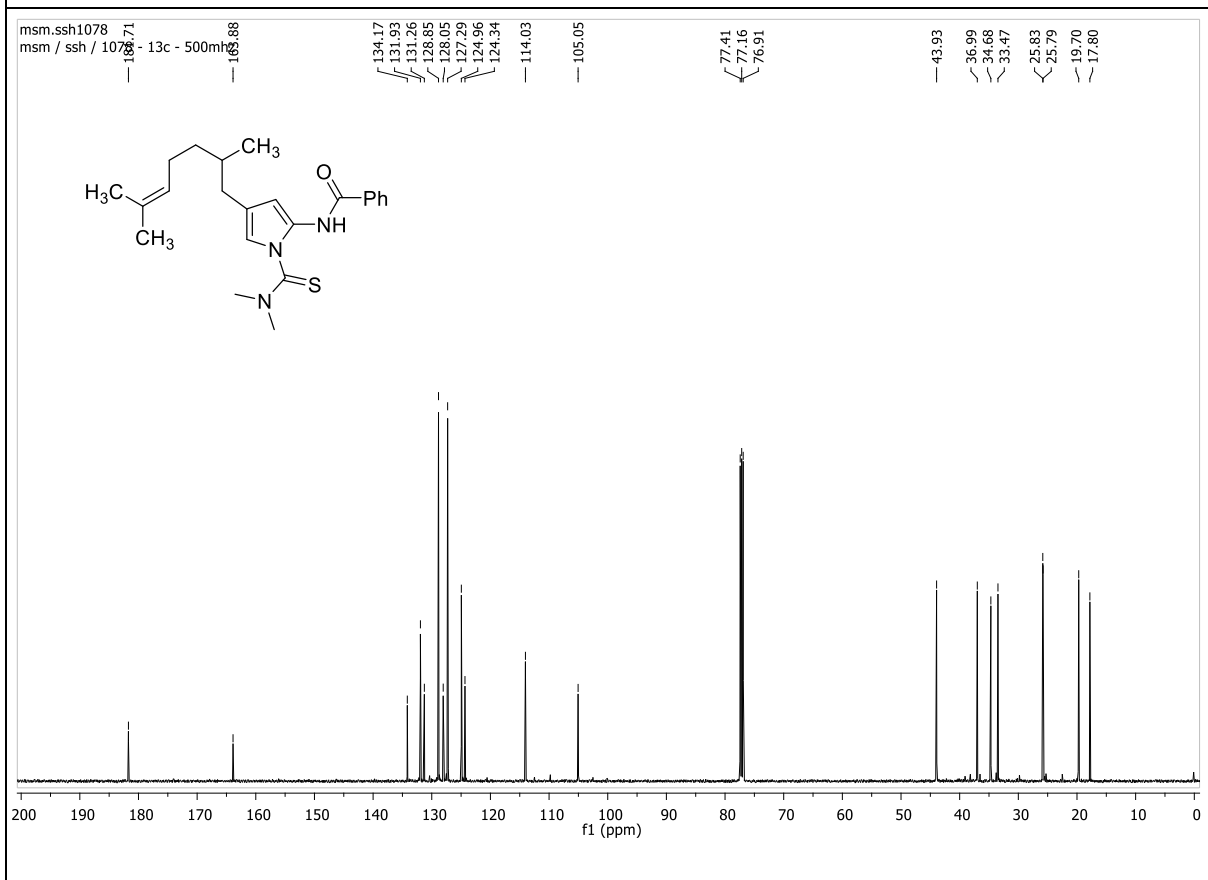

# <sup>1</sup>H NMR and <sup>13</sup>C NMR Spectra of Compound 6p

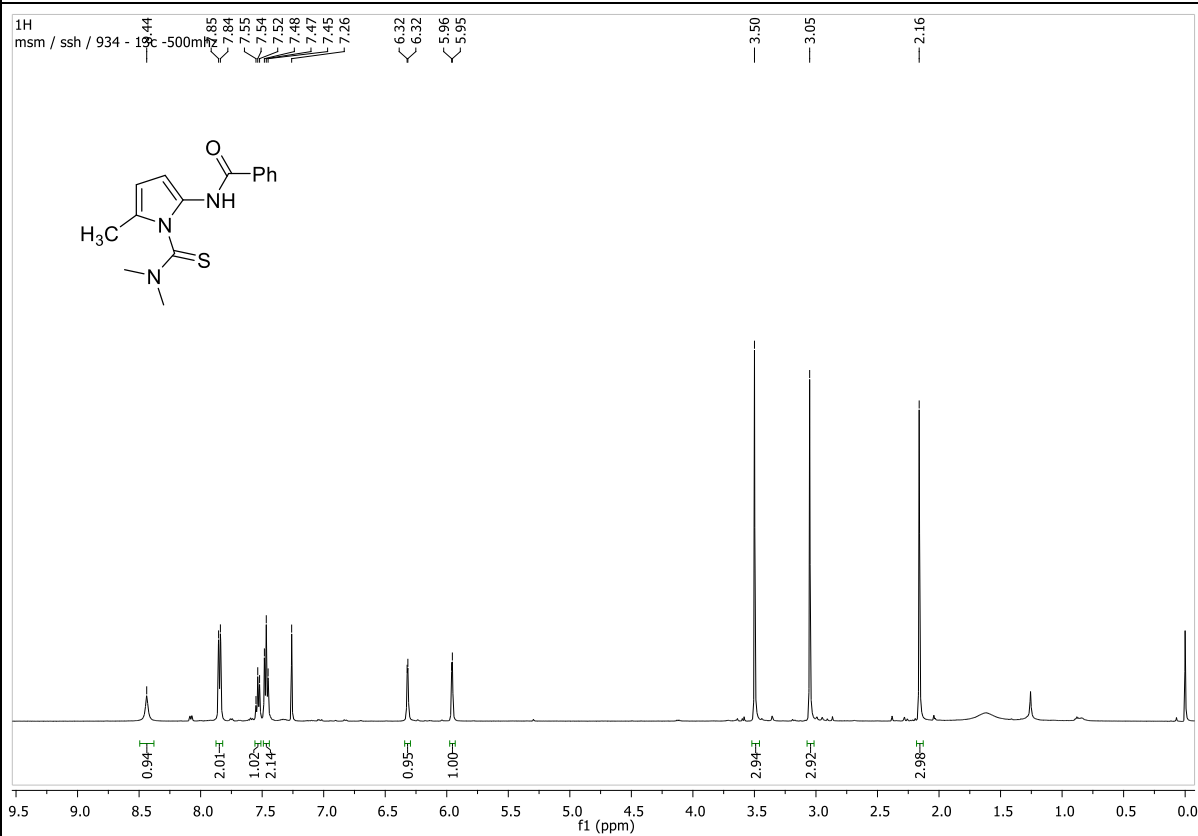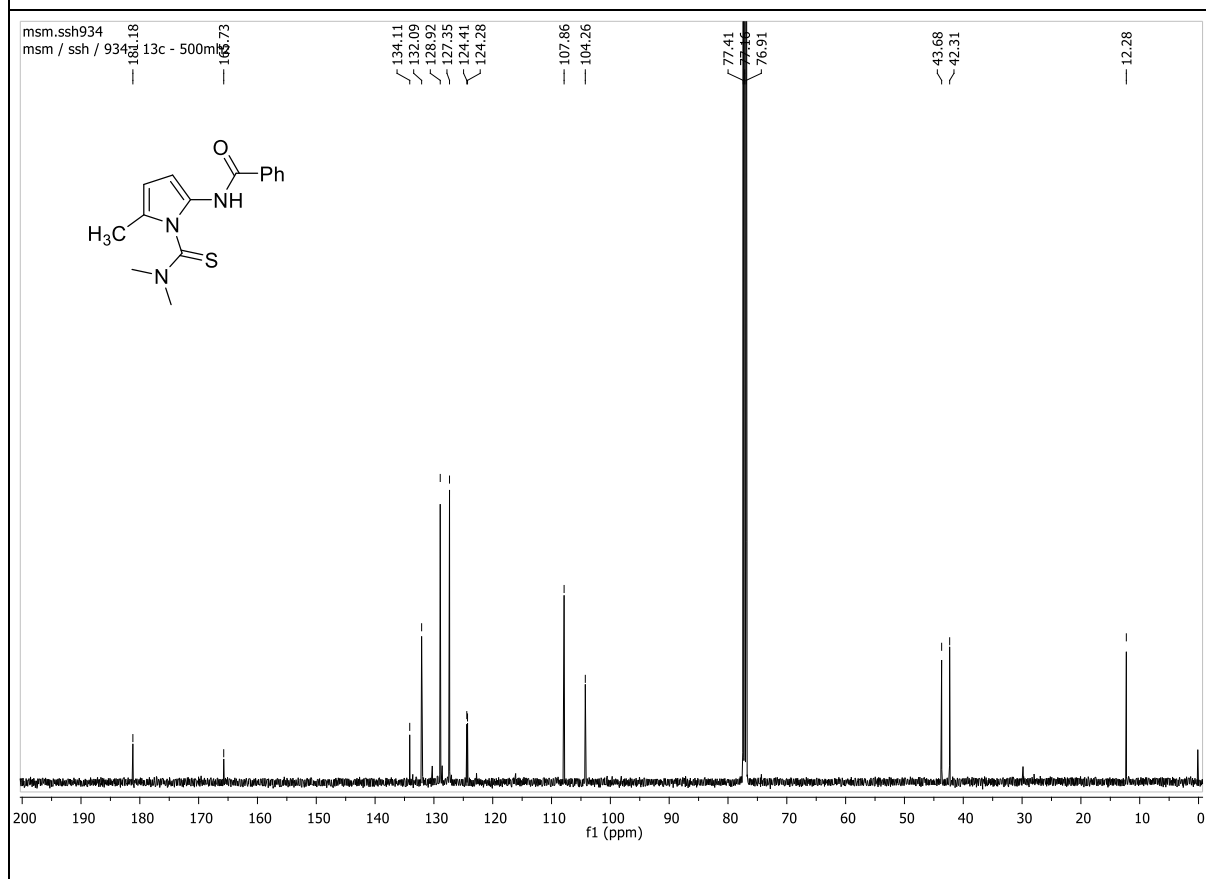

# $^1\text{H}$ NMR and $^{13}\text{C}$ NMR Spectra of Compound **6q**

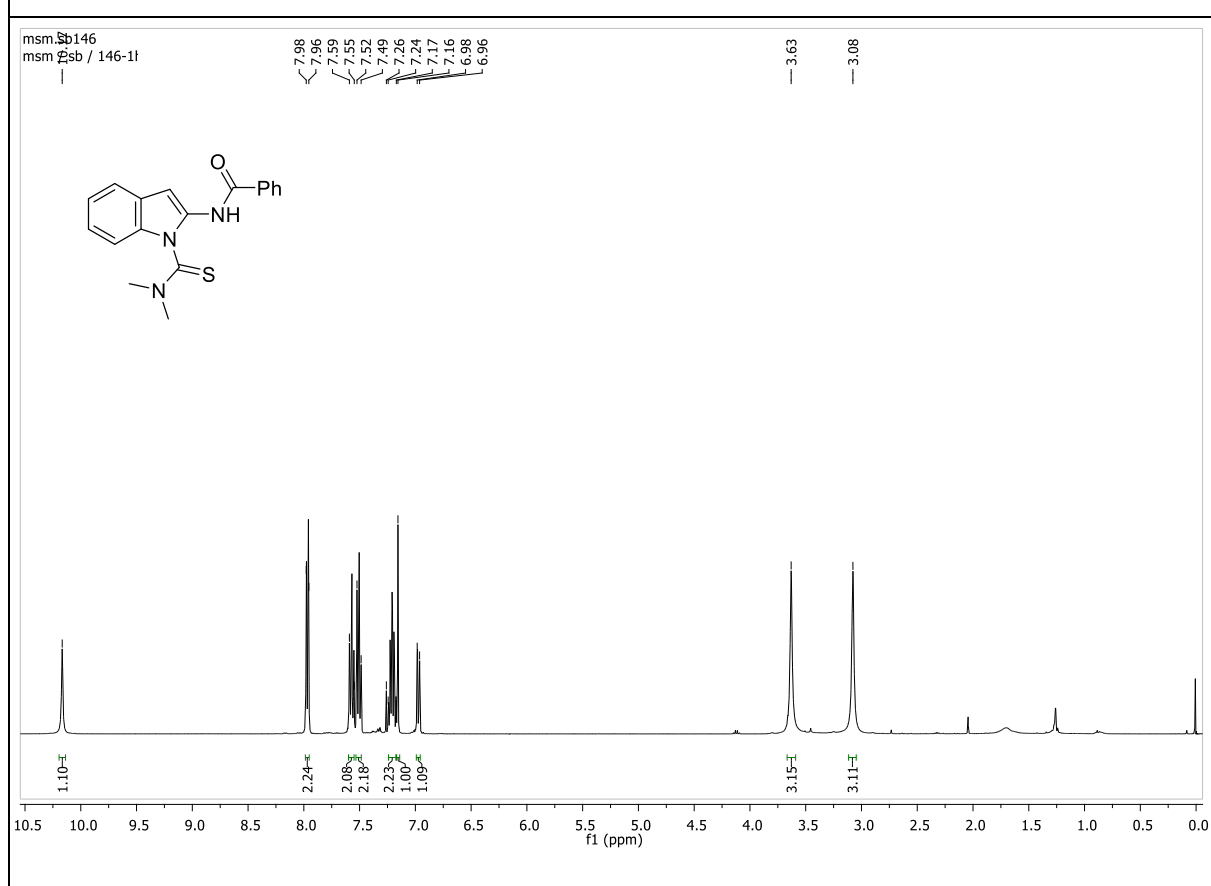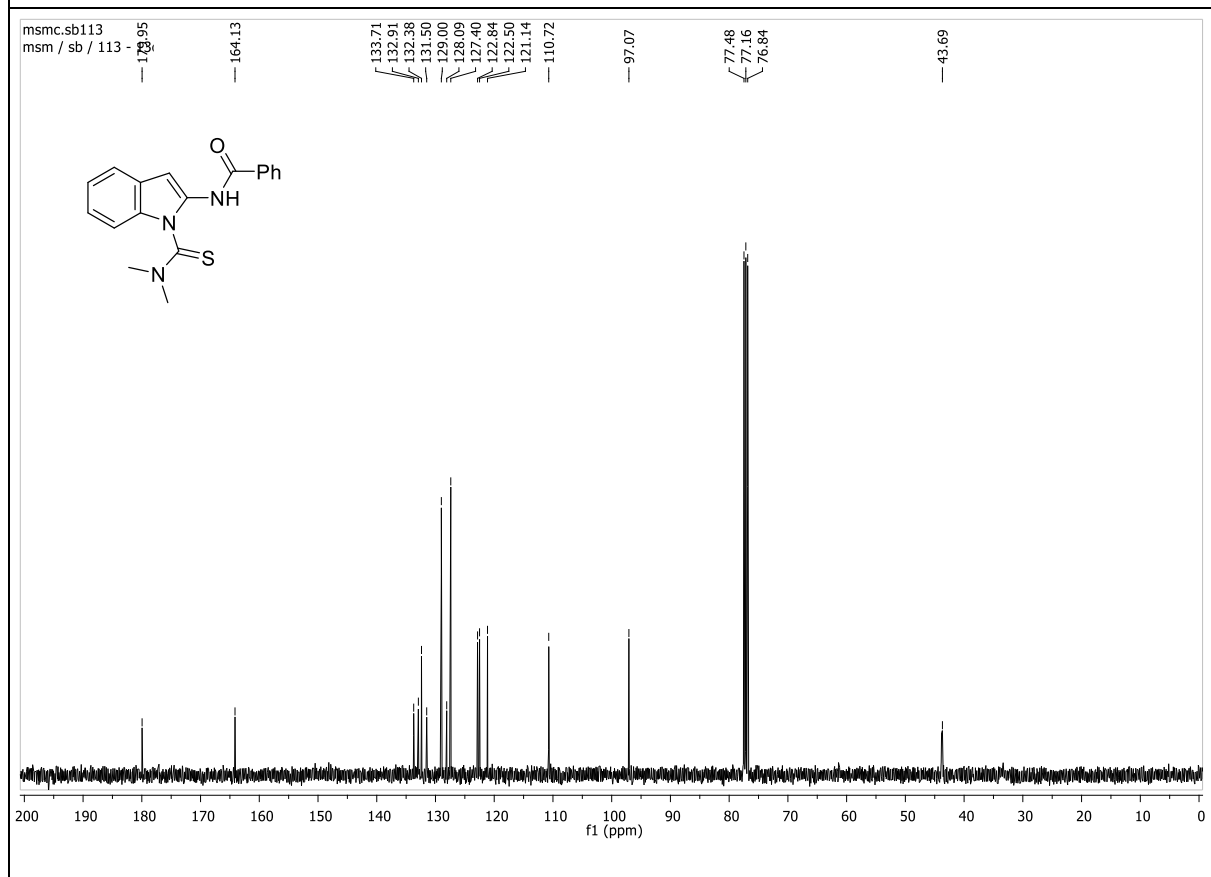



# $^1\text{H}$ NMR and $^{13}\text{C}$ NMR Spectra of Compound **6r**

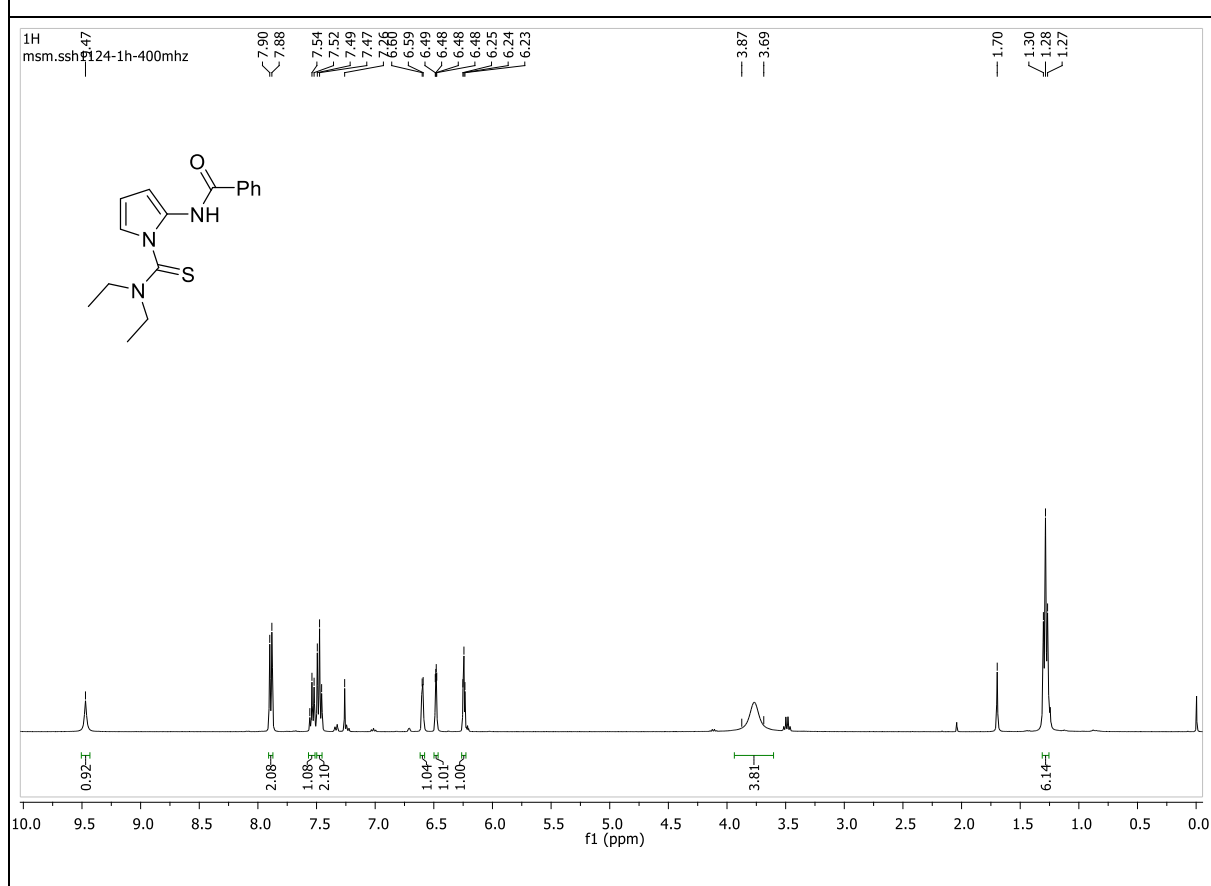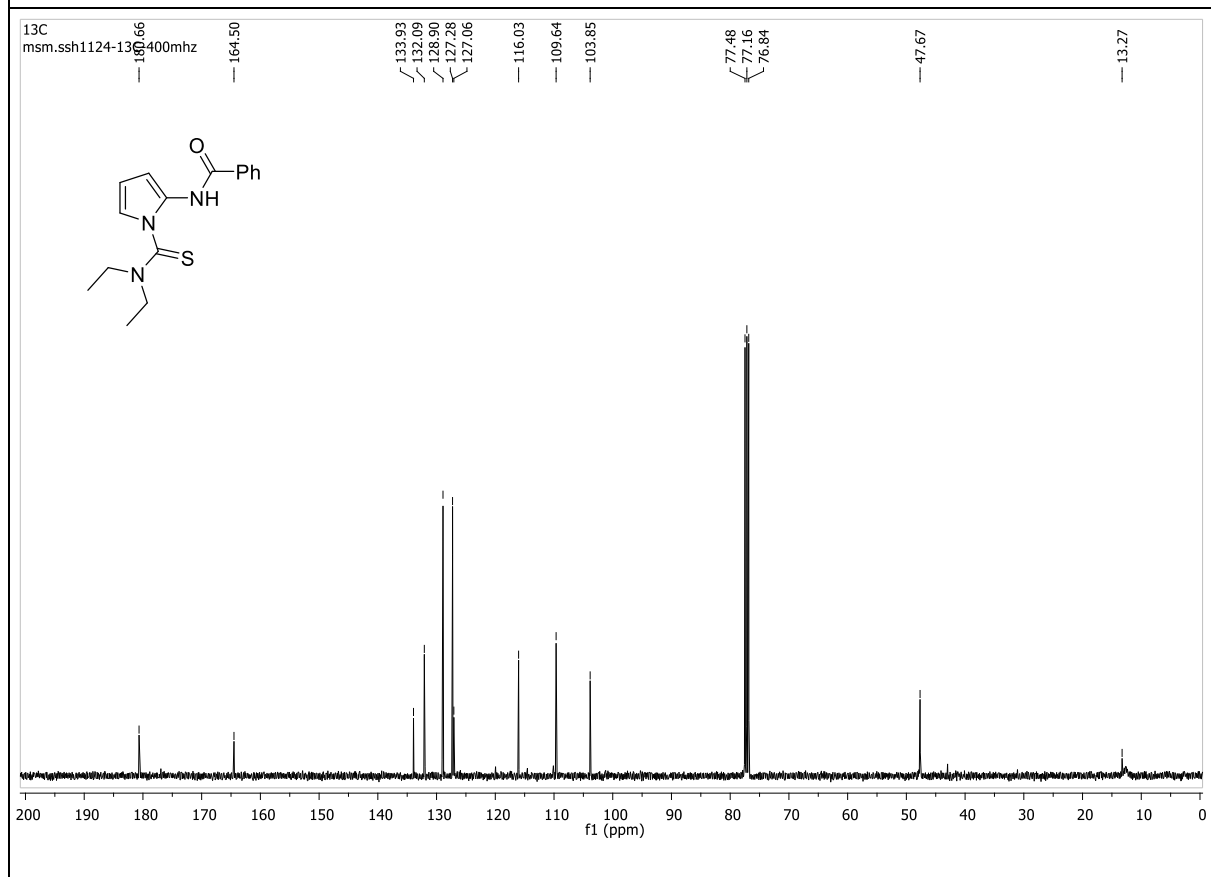

# <sup>1</sup>H NMR and <sup>13</sup>C NMR Spectra of Compound 6s

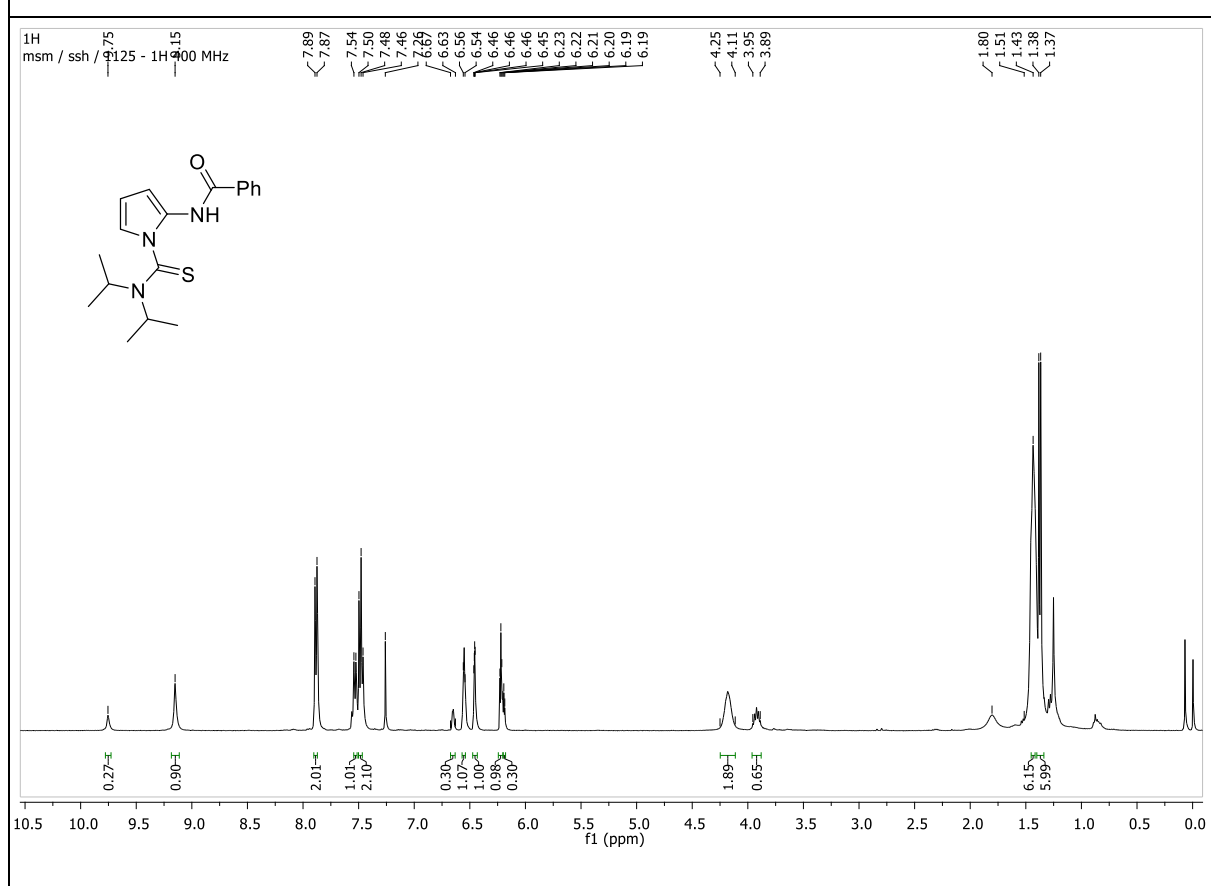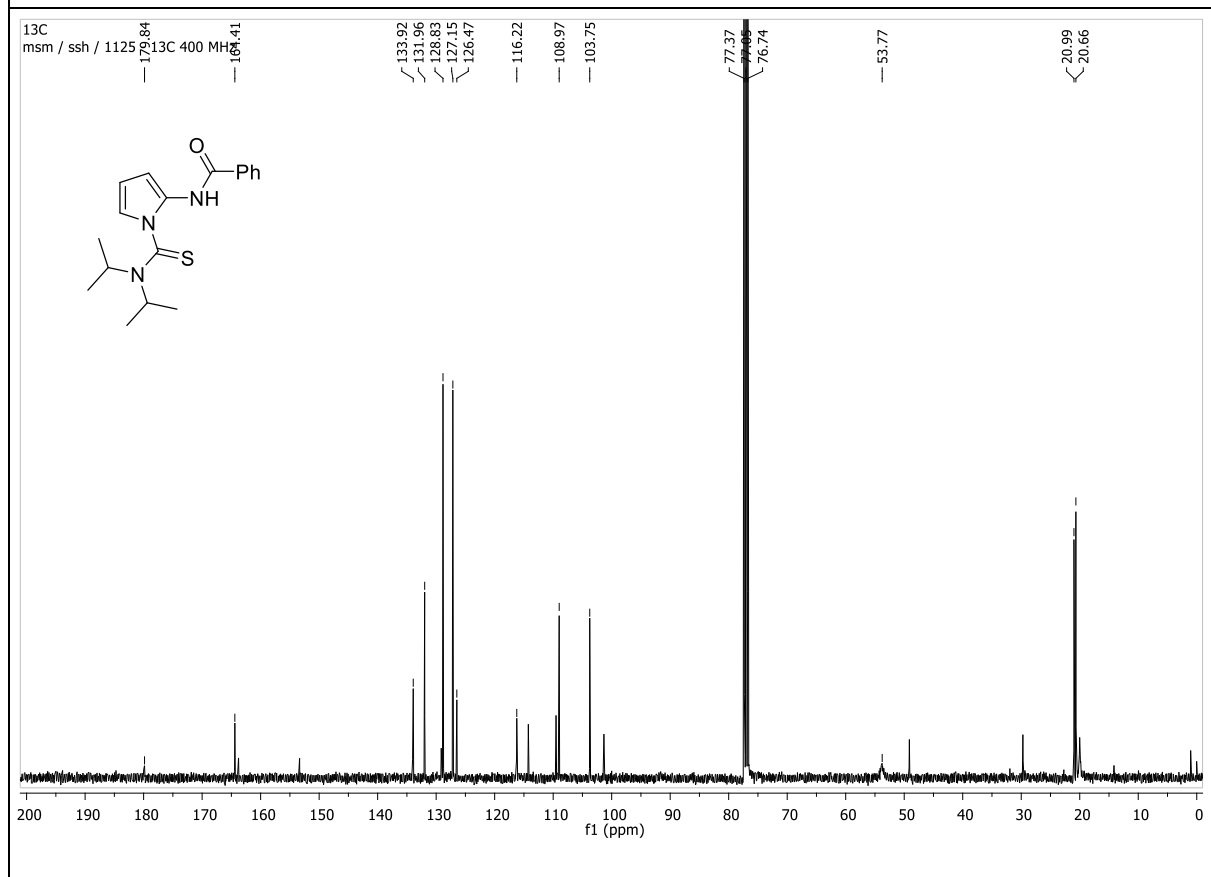

# <sup>1</sup>H NMR and <sup>13</sup>C NMR Spectra of Compound 7

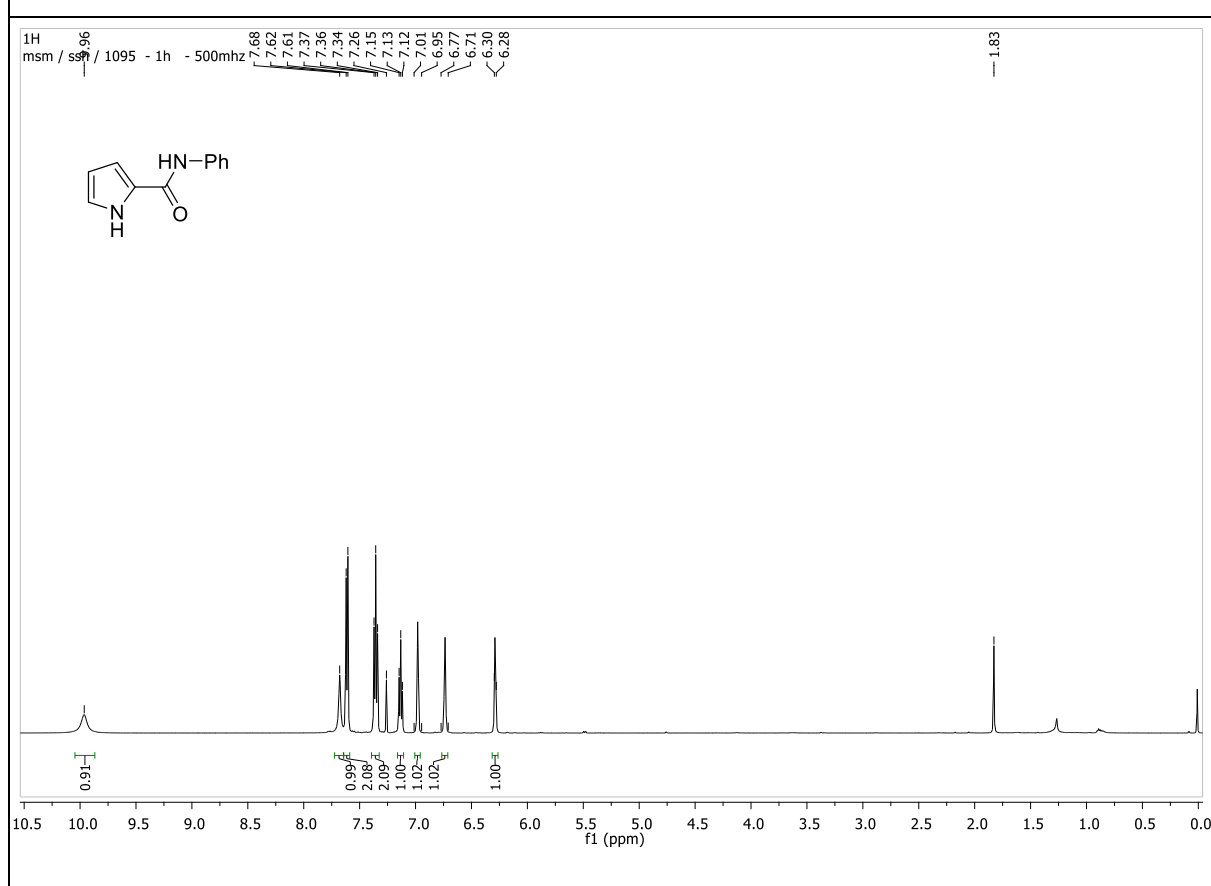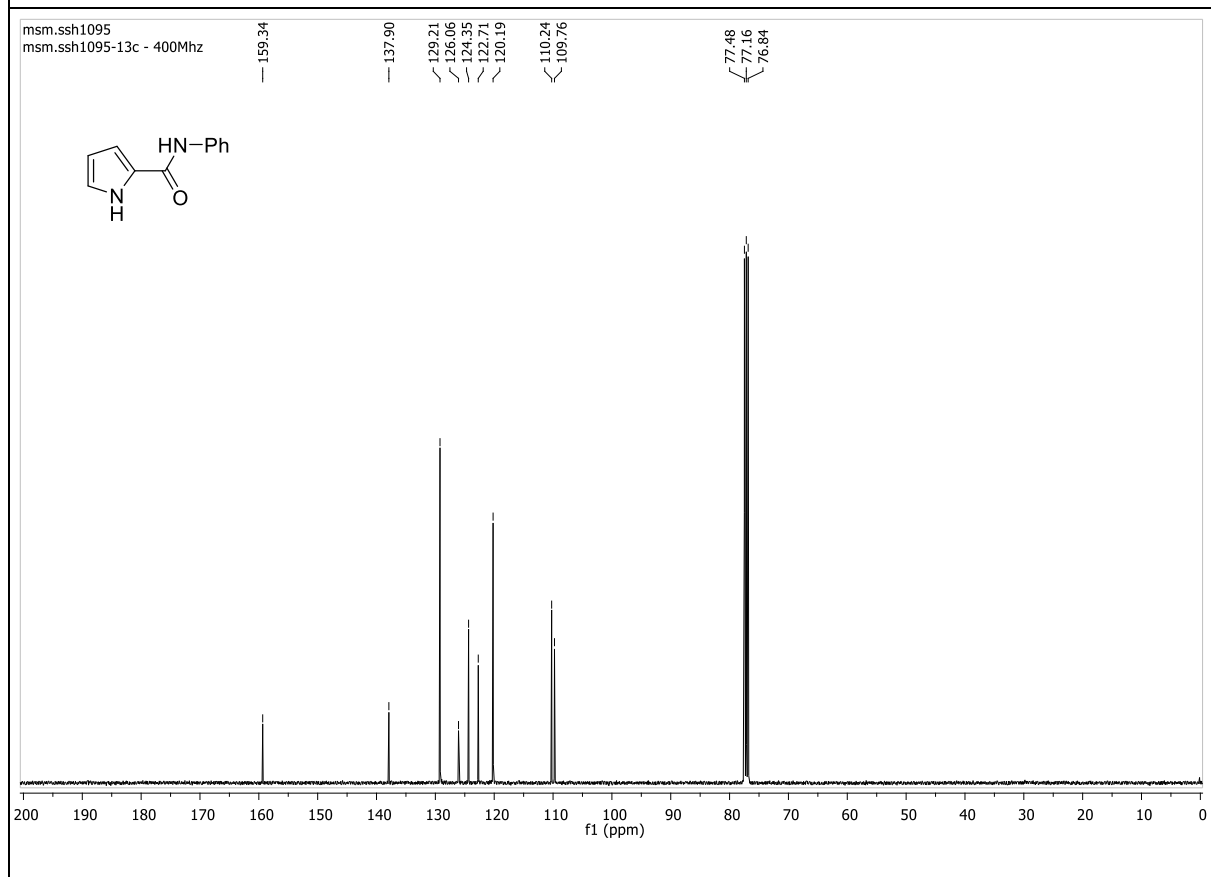

# <sup>1</sup>H NMR and <sup>13</sup>C NMR Spectra of Compound 8

mzm.ssh9222p  
mzm / ssh / 922p - 13c - 500mhz

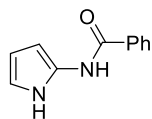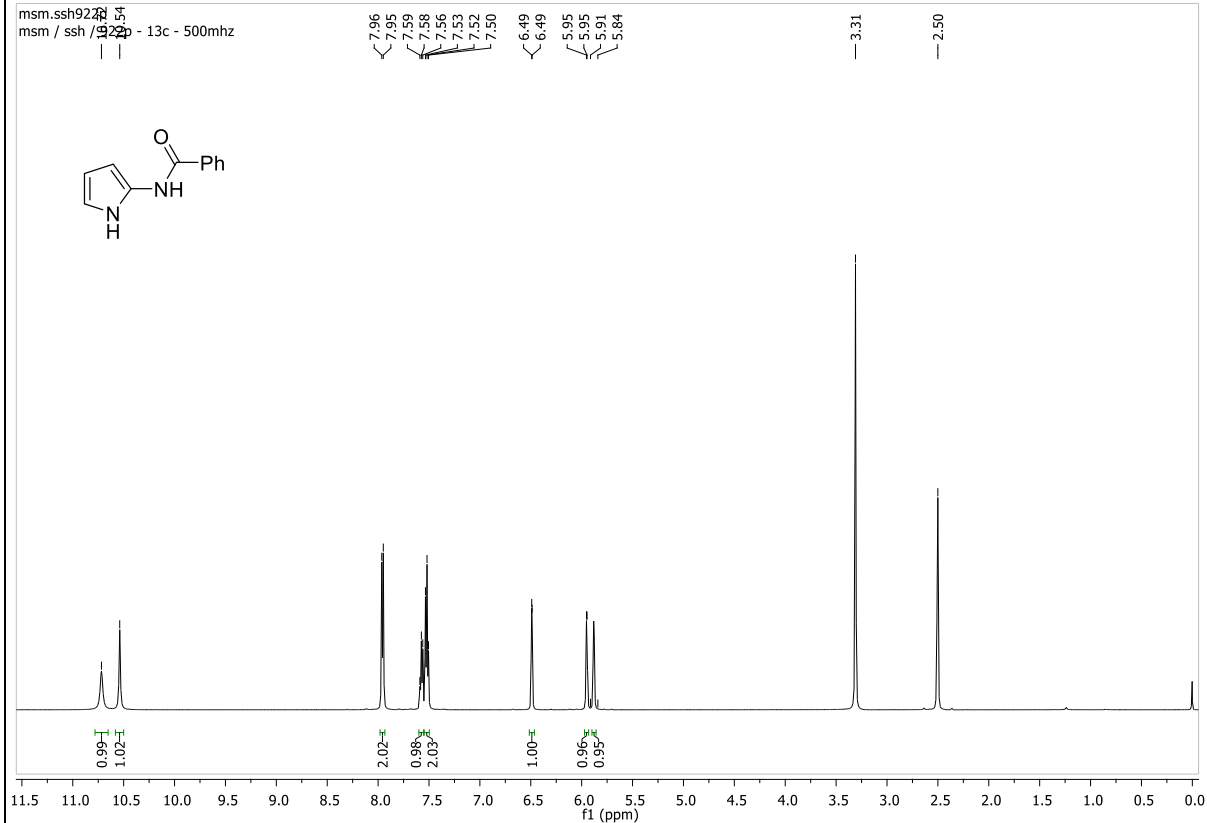

mzm.ssh922p  
mzm / ssh / 922p - 13c - 500mhz

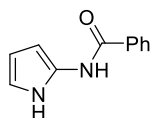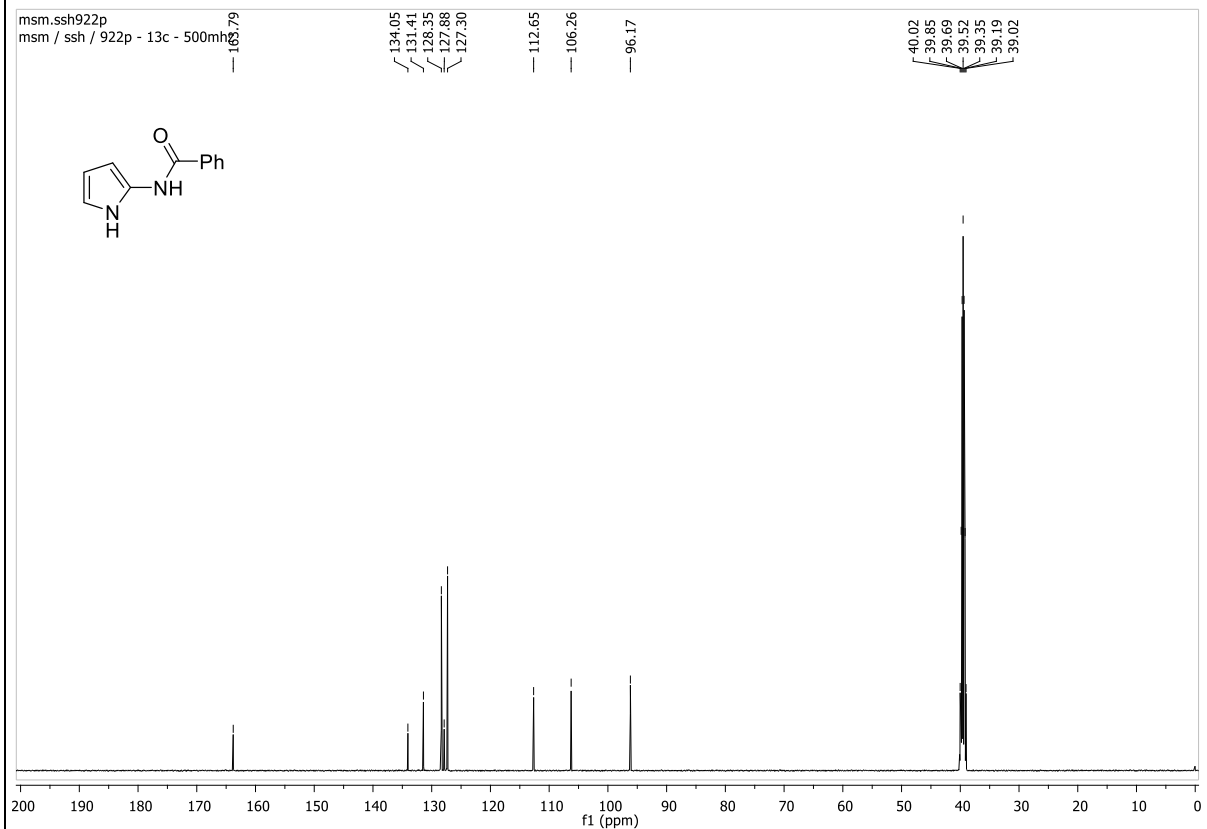

# $^1\text{H}$ NMR and $^{13}\text{C}$ NMR Spectra of Compound 9

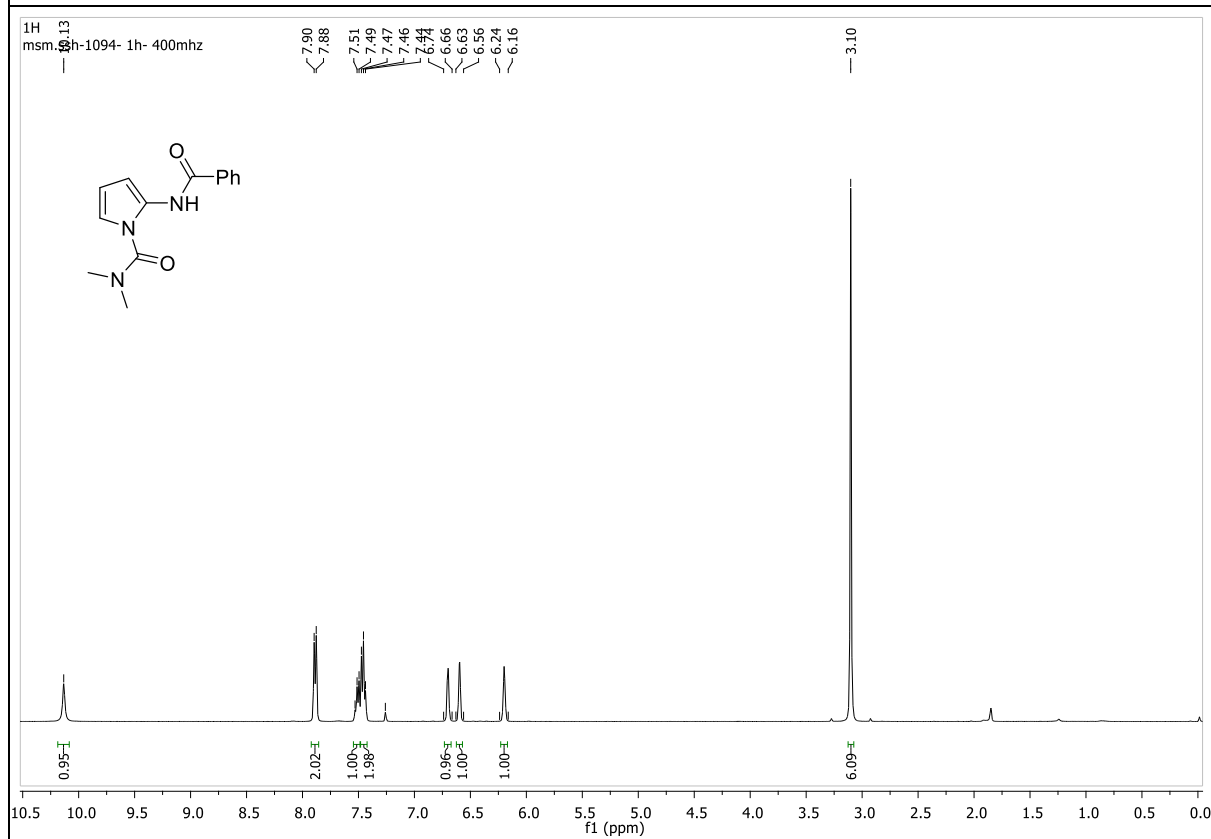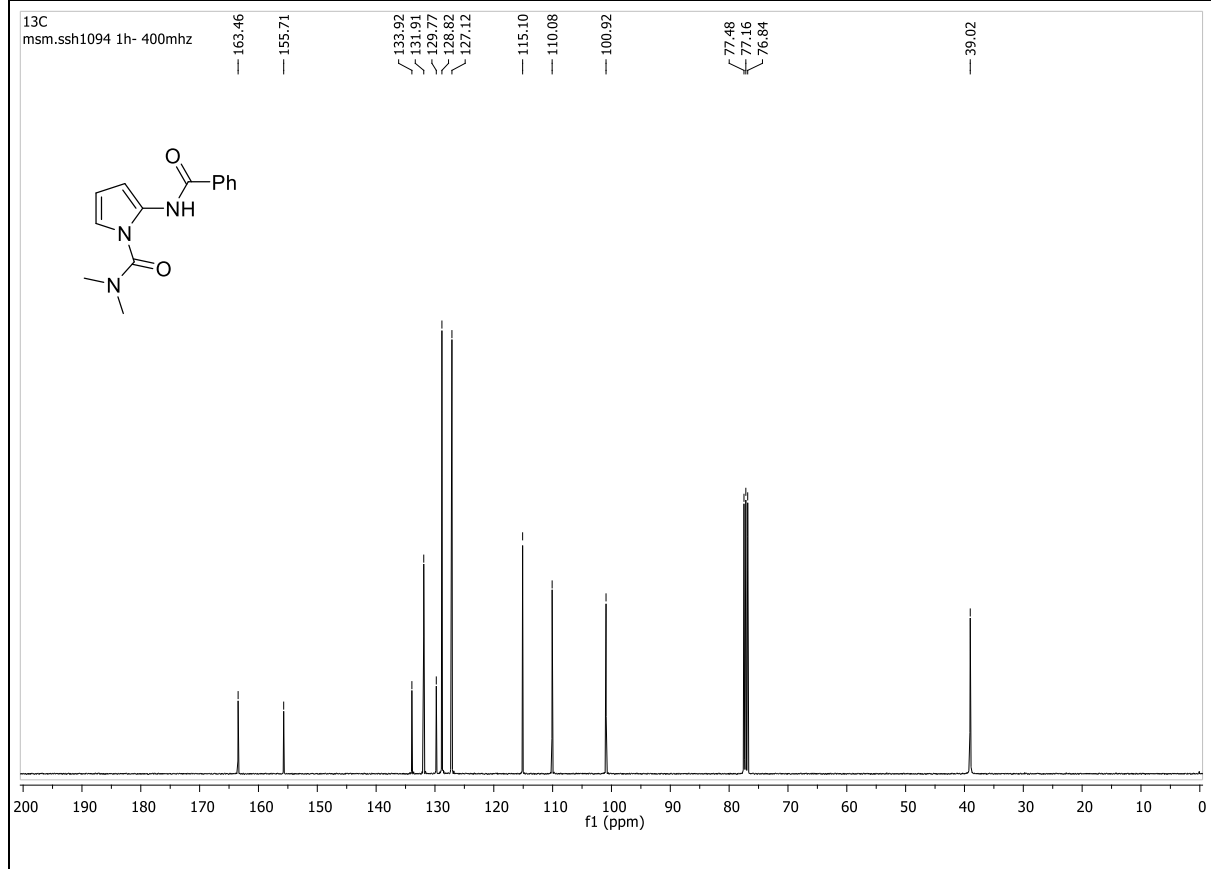

# <sup>1</sup>H NMR and <sup>13</sup>C NMR Spectra of Compound 10

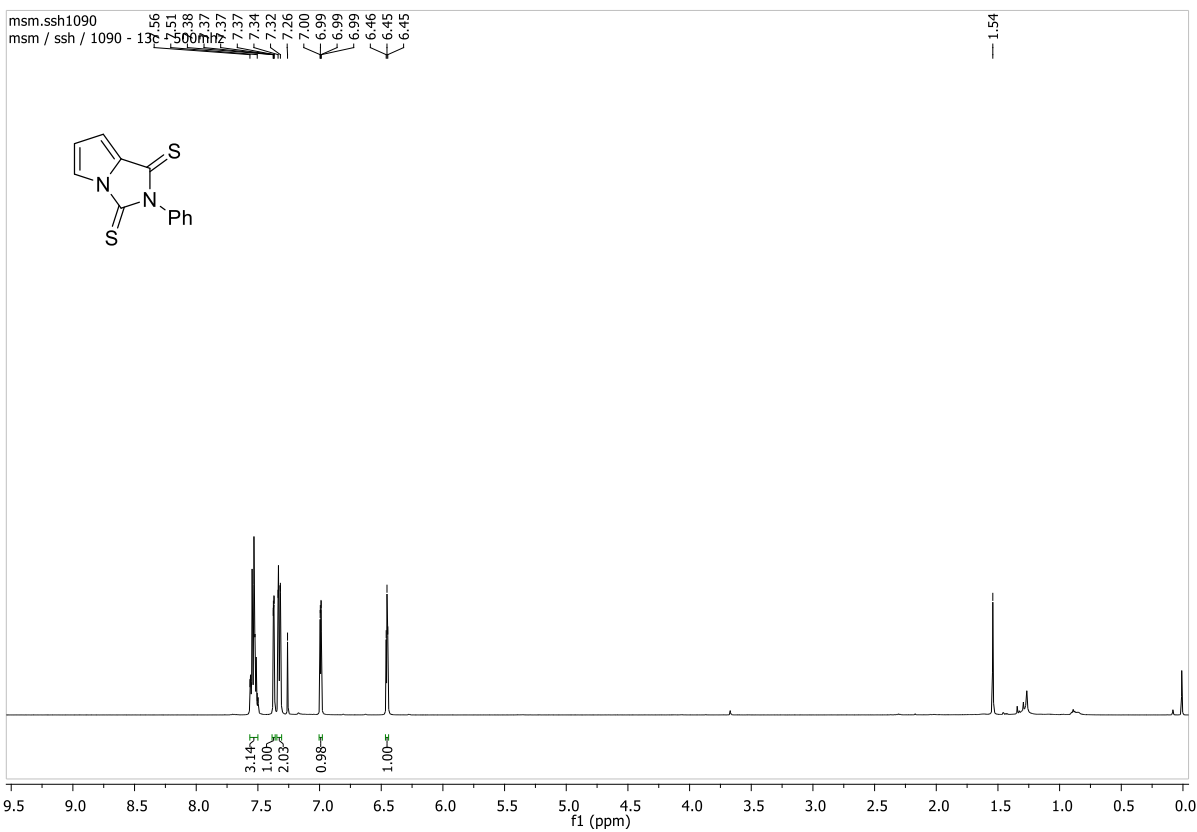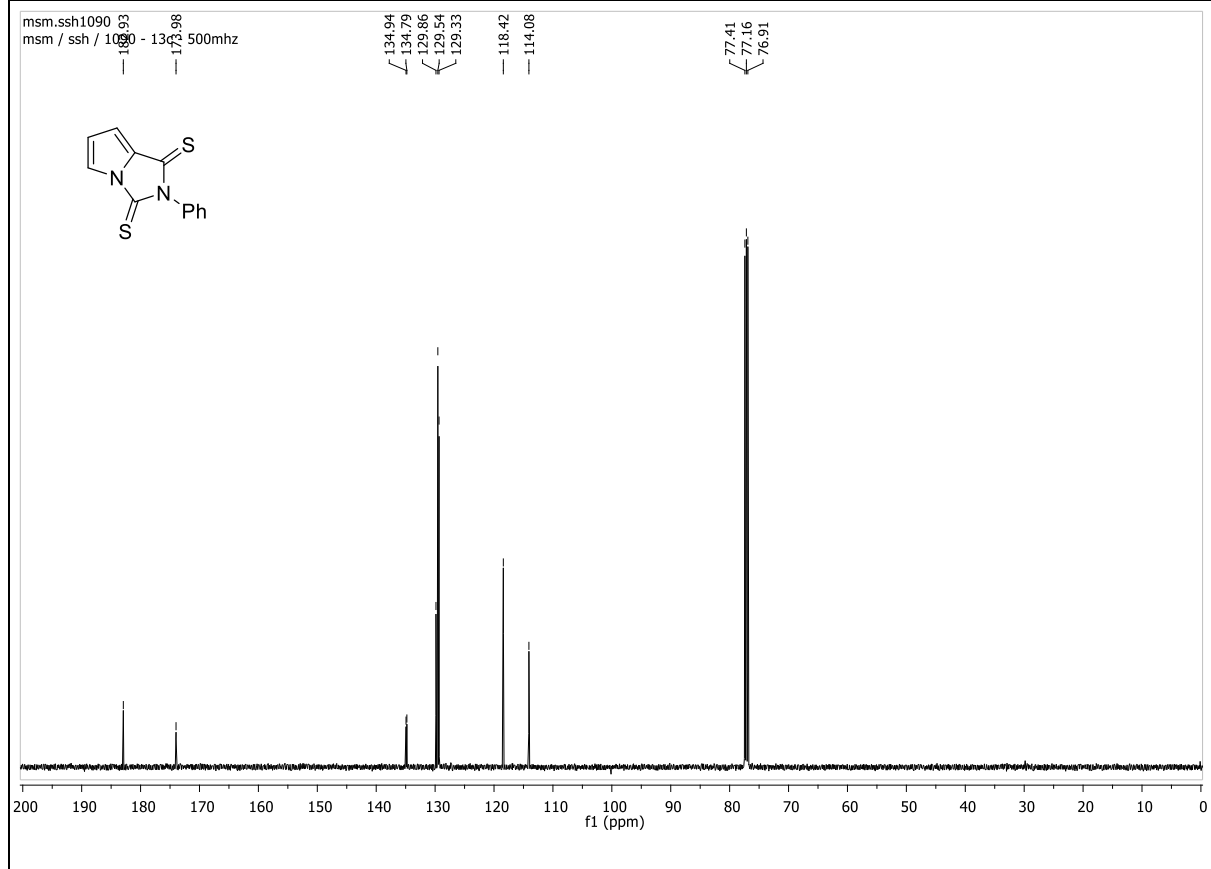

# <sup>1</sup>H NMR and <sup>13</sup>C NMR Spectra of Compound 11

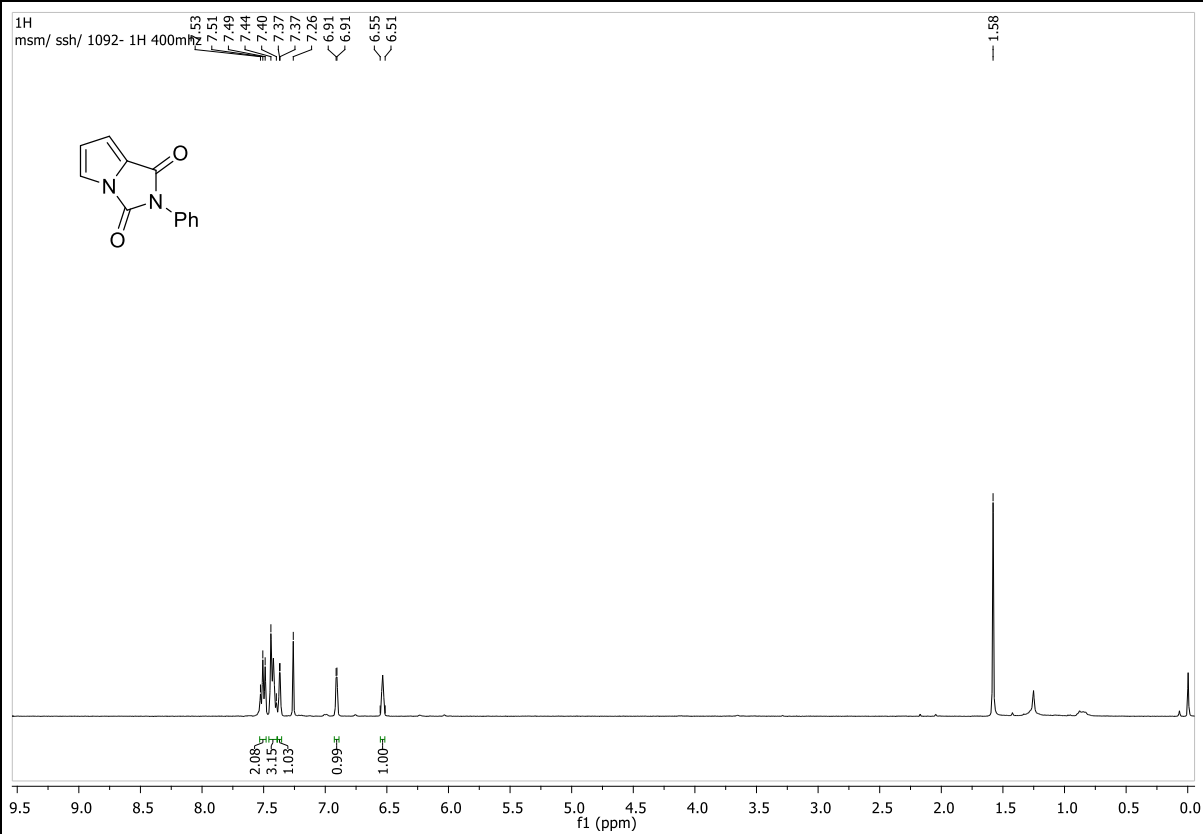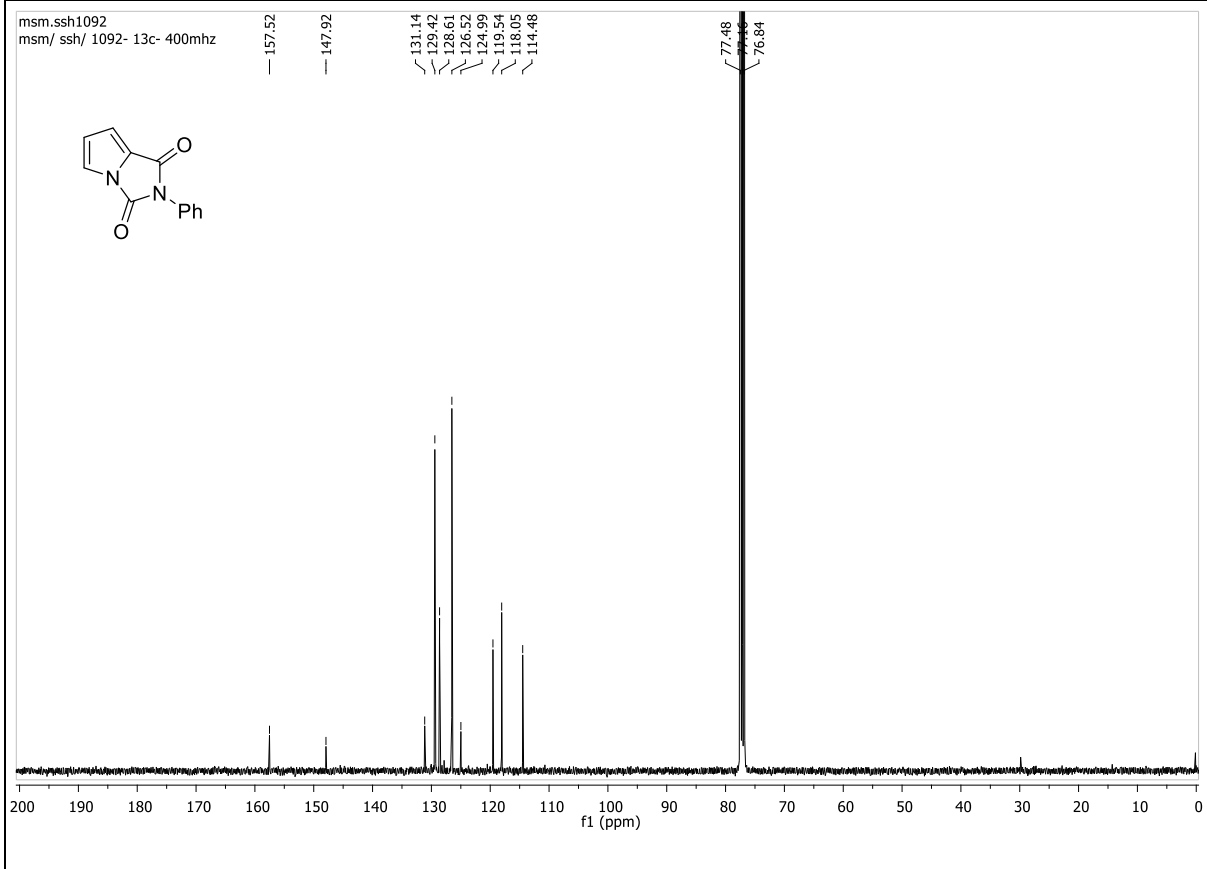

Supplement: d2cc03992c1.pdf [file d2cc03992c1.pdf]
